# Supplementary material for: Loss of Ezh2 in the medial ganglionic eminence alters interneuron fate, cell morphology and gene expression profiles
Source: bioRxiv preprint, doi:10.1101/2023.09.06.556544, version 1 (2023-09-06)
Supplement: Supplementary Table 3_E12CUTTAG [file 556544_file04.xlsx]

## Sheet: e12_annotated
SYMBOL	Conc	Fold	p.value	FDR	annotation	start	end	geneChr	geneStart	geneEnd	geneLength	geneStrand	geneId	transcriptId	distanceToTSS	ENSEMBL	GENENAME
Foxp4	7.20467	-1.82929	1.71307e-07	0.00134466	Promoter (2-3kb)	47921609	47922008	17	47867764	47924400	56637	2	74123	ENSMUST00000113263.7	2392	ENSMUSG00000023991	forkhead box P4
Trim71	6.16954	-3.0312	3.3316e-07	0.00134466	Promoter (2-3kb)	114561128	114561527	9	114507133	114564369	57237	2	636931	ENSMUST00000111816.2	2842	ENSMUSG00000079259	tripartite motif-containing 71
Nkx2-1	7.04161	1.56029	3.94212e-07	0.00134466	Promoter (1-2kb)	56533444	56533843	12	56531958	56535106	3149	2	21869	ENSMUST00000178477.8	1263	ENSMUSG00000001496	NK2 homeobox 1
Sntb2	4.67803	-4.8382	1.61619e-06	0.00413461	Intron (ENSMUST00000212524.1/20650, intron 1 of 6)	106976910	106977309	8	106936149	106981744	45596	1	20650	ENSMUST00000212298.1	40761	ENSMUSG00000041308	syntrophin, basic 2
Iqch	6.33294	-1.86427	6.59843e-06	0.0119359	Intron (ENSMUST00000126238.2/ENSMUST00000126238.2, intron 3 of 4)	63561913	63562312	9	63421835	63602417	180583	2	78250	ENSMUST00000171243.1	40105	ENSMUSG00000037801	IQ motif containing H
2300009A05Rik	5.307	-3.23628	7.45132e-06	0.0119359	Intron (ENSMUST00000126238.2/ENSMUST00000126238.2, intron 3 of 4)	63494937	63495336	9	63394447	63399241	4795	2	69478	ENSMUST00000168665.2	-95696	ENSMUSG00000032403	RIKEN cDNA 2300009A05 gene
Zfhx3	5.10997	-2.7287	8.1649e-06	0.0119359	Intron (ENSMUST00000220518.1/11906, intron 2 of 15)	108241171	108241570	8	107942644	108961630	1018987	1	11906	ENSMUST00000220518.1	298527	ENSMUSG00000038872	zinc finger homeobox 3
4930405A10Rik	6.06719	-1.52747	1.66885e-05	0.015736	Intron (ENSMUST00000075639.10/76633, intron 2 of 6)	22437715	22438114	14	22507174	22542798	35625	2	74896	ENSMUST00000225327.1	104684	ENSMUSG00000114412	RIKEN cDNA 4930405A10 gene
4930431P03Rik	6.7222	-1.26102	1.67338e-05	0.015736	Promoter (<=1kb)	44989366	44989765	14	44955217	44989624	34408	2	73895	ENSMUST00000227028.1	0	ENSMUSG00000075042	RIKEN cDNA 4930431P03 gene
C130071C03Rik	4.59481	1.71085	1.77746e-05	0.015736	Promoter (4-5kb)	83716504	83716903	13	83721381	83741308	19928	1	320203	ENSMUST00000131907.8	-4478	ENSMUSG00000050334	RIKEN cDNA C130071C03 gene
9530036O11Rik	7.37774	1.0867	1.97562e-05	0.015736	Promoter (3-4kb)	28463442	28463841	5	28466984	28719209	252226	1	654796	ENSMUST00000181202.1	-3143	ENSMUSG00000097726	RIKEN cDNA 9530036O11Rik
Lingo1	4.59983	-2.63018	1.9976e-05	0.015736	Promoter (1-2kb)	56767489	56767888	9	56685190	56769123	83934	2	235402	ENSMUST00000210995.1	1235	ENSMUSG00000049556	leucine rich repeat and Ig domain containing 1
Meis1	6.06637	-1.57357	1.9991e-05	0.015736	Promoter (<=1kb)	19015765	19016164	11	18881360	19016289	134930	2	17268	ENSMUST00000177357.3	125	ENSMUSG00000020160	Meis homeobox 1
Lif	5.69391	-1.8326	2.35628e-05	0.0170348	Distal Intergenic	4307684	4308083	11	4267095	4272514	5420	1	16878	ENSMUST00000040750.3	40589	ENSMUSG00000034394	leukemia inhibitory factor
Lrmda	7.16097	-1.31132	2.52996e-05	0.0170348	Promoter (<=1kb)	22019571	22019970	14	22019712	23056085	1036374	1	76633	ENSMUST00000075639.10	0	ENSMUSG00000063458	leucine rich melanocyte differentiation associated
Tmem260	4.6608	-2.69845	2.73552e-05	0.0170348	Distal Intergenic	48422037	48422436	14	48446124	48520368	74245	1	218989	ENSMUST00000227440.1	-23688	ENSMUSG00000036339	transmembrane protein 260
Smyd3	6.55578	-1.49426	2.88799e-05	0.0170348	Intron (ENSMUST00000128302.7/69726, intron 5 of 11)	179104373	179104772	1	178957250	178989345	32096	2	69726	ENSMUST00000129393.1	-115028	ENSMUSG00000055067	SET and MYND domain containing 3
Efnb2	5.2956	-1.94737	2.99645e-05	0.0170348	Intron (ENSMUST00000207967.1/ENSMUST00000207967.1, intron 3 of 4)	8378874	8379273	8	8620597	8639363	18767	2	13642	ENSMUST00000152698.1	260090	ENSMUSG00000001300	ephrin B2
Tgfbr3	4.5642	-2.59921	3.67185e-05	0.0192158	Intron (ENSMUST00000031224.14/21814, intron 2 of 16)	107262373	107262772	5	107147980	107289595	141616	2	21814	ENSMUST00000146591.1	26823	ENSMUSG00000029287	transforming growth factor, beta receptor III
Zfhx3	4.55579	-2.76984	3.75566e-05	0.0192158	Intron (ENSMUST00000220518.1/11906, intron 2 of 15)	108247033	108247432	8	107942644	108961630	1018987	1	11906	ENSMUST00000220518.1	304389	ENSMUSG00000038872	zinc finger homeobox 3
Tgfbr3	6.26241	-1.31987	4.28008e-05	0.0207003	Promoter (<=1kb)	107288490	107288889	5	107147980	107289595	141616	2	21814	ENSMUST00000146591.1	706	ENSMUSG00000029287	transforming growth factor, beta receptor III
B230323A14Rik	4.38282	-2.23674	4.45036e-05	0.0207003	Distal Intergenic	69839809	69840208	9	69761146	69830199	69054	1	319970	ENSMUST00000180914.1	78663	ENSMUSG00000097623	RIKEN cDNA B230323A14 gene
Zeb2	3.8057	-2.98542	4.71013e-05	0.020956	Promoter (1-2kb)	45108524	45108923	2	45105265	45110076	4812	2	24136	ENSMUST00000201298.1	1153	ENSMUSG00000026872	zinc finger E-box binding homeobox 2
Bub3	5.32109	-1.66521	5.99831e-05	0.0251438	Intron (ENSMUST00000124096.7/14183, intron 2 of 6)	131646014	131646413	7	131560710	131571164	10455	1	12237	ENSMUST00000207442.1	85304	ENSMUSG00000066979	BUB3 mitotic checkpoint protein
Lrp4	7.28478	-1.09453	6.23565e-05	0.0251438	Promoter (<=1kb)	91457727	91458126	2	91457511	91513779	56269	1	228357	ENSMUST00000028689.3	216	ENSMUSG00000027253	low density lipoprotein receptor-related protein 4
Gli2	4.68179	-1.82969	6.44693e-05	0.0251438	Promoter (<=1kb)	118981743	118982142	1	118868042	118982588	114547	2	14633	ENSMUST00000159678.2	446	ENSMUSG00000048402	GLI-Kruppel family member GLI2
Tnfrsf19	6.00587	-1.43108	6.82398e-05	0.0251438	Intron (ENSMUST00000227051.1/ENSMUST00000227051.1, intron 2 of 3)	61056489	61056888	14	60974361	61046490	72130	2	29820	ENSMUST00000224371.1	-9999	ENSMUSG00000060548	tumor necrosis factor receptor superfamily, member 19
Mir5120	6.28219	1.28964	7.1576e-05	0.0251438	Distal Intergenic	44521135	44521534	4	44607491	44607568	78	2	100628590	ENSMUST00000175020.1	86034	ENSMUSG00000092761	microRNA 5120
8430437L04Rik	3.86314	-2.72827	7.31789e-05	0.0251438	Distal Intergenic	72619169	72619568	2	72703510	72729468	25959	1	74541	ENSMUST00000124829.1	-83942	ENSMUSG00000085252	RIKEN cDNA 8430437L04 gene
Fzd7	8.28932	-1.02793	7.37138e-05	0.0251438	Promoter (<=1kb)	59483337	59483736	1	59482424	59486955	4532	1	14369	ENSMUST00000114246.3	913	ENSMUSG00000041075	frizzled class receptor 7
Ccl1	3.71172	-2.8907	8.4843e-05	0.0280064	Intron (ENSMUST00000138333.1/20290, intron 7 of 10)	82231008	82231407	11	82176659	82179812	3154	2	20290	ENSMUST00000021043.4	-51196	ENSMUSG00000020702	chemokine (C-C motif) ligand 1
Lncppara	6.98976	1.02793	9.16607e-05	0.0282604	Intron (ENSMUST00000230234.1/ENSMUST00000230234.1, intron 1 of 1)	85662629	85663028	15	85653616	85707524	53909	1	102800312	ENSMUST00000230913.1	9013	NA	long noncoding RNA near Ppara
Mideas	4.90841	-1.57539	9.48627e-05	0.0282604	Promoter (<=1kb)	84218322	84218721	12	84149176	84218881	69706	2	238317	ENSMUST00000046266.12	160	ENSMUSG00000042507	mitotic deacetylase associated SANT domain protein
Gsg1l	4.05293	-2.41263	9.51273e-05	0.0282604	Intron (ENSMUST00000073935.6/269994, intron 2 of 6)	126012026	126012425	7	125878420	126082411	203992	2	269994	ENSMUST00000073935.6	69986	ENSMUSG00000046182	GSG1-like
Gli3	4.29274	-2.14121	9.66592e-05	0.0282604	Promoter (<=1kb)	15463144	15463543	13	15463235	15715091	251857	1	14634	ENSMUST00000130065.7	0	ENSMUSG00000021318	GLI-Kruppel family member GLI3
Mdfic	3.604	-3.18243	0.000103358	0.0286531	Promoter (<=1kb)	15720790	15721189	6	15721087	15800808	79722	1	16543	ENSMUST00000120512.7	0	ENSMUSG00000041390	MyoD family inhibitor domain containing
Gm13889	4.37713	1.5189	0.000103603	0.0286531	Promoter (1-2kb)	93954828	93955227	2	93955810	93957049	1240	2	620695	ENSMUST00000148314.2	1822	ENSMUSG00000087006	predicted gene 13889
Mir9-3hg	4.0091	1.66832	0.00011156	0.0300418	Intron (ENSMUST00000206829.1/ENSMUST00000206829.1, intron 1 of 1)	79537559	79537958	7	79527850	79532044	4195	1	101694	ENSMUST00000182125.1	9709	ENSMUSG00000097023	Mir9-3 host gene
Sez6	5.23048	1.44348	0.000116769	0.0306384	Promoter (1-2kb)	77932141	77932540	11	77931039	77978061	47023	1	20370	ENSMUST00000155087.7	1102	ENSMUSG00000000632	seizure related gene 6
Gm10578	5.09715	-1.46234	0.000161164	0.0412297	Exon (ENSMUST00000169486.8/13593, exon 16 of 16)	137196172	137196571	7	137234683	137240366	5684	1	100038555	ENSMUST00000209747.1	-38112	ENSMUSG00000109722	predicted gene 10578
Shisa2	3.69571	-3.29358	0.000167393	0.0412955	Intron (ENSMUST00000080368.12/50769, intron 32 of 35)	59739446	59739845	14	59627189	59629677	2489	1	219134	ENSMUST00000224155.1	112257	ENSMUSG00000044461	shisa family member 2
1700108J01Rik	6.92422	-0.9417	0.000169492	0.0412955	Promoter (2-3kb)	122230502	122230901	14	122229905	122233654	3750	2	68245	ENSMUST00000187423.1	2753	ENSMUSG00000100585	RIKEN cDNA 1700108J01 gene
1700057H15Rik	3.94585	1.72324	0.000186634	0.0444146	Promoter (2-3kb)	124483044	124483443	4	124449902	124485959	36058	2	78460	ENSMUST00000143859.7	2516	NA	RIKEN cDNA 1700057H15 gene
Kirrel3	4.6605	-3.29392	0.00019951	0.0463996	Intron (ENSMUST00000115148.8/67703, intron 2 of 16)	34663488	34663887	9	34488936	35036310	547375	1	67703	ENSMUST00000187182.6	174552	ENSMUSG00000032036	kirre like nephrin family adhesion molecule 3
Tle2	7.23242	0.978663	0.000209699	0.047008	Promoter (1-2kb)	81573032	81573431	10	81574561	81590466	15906	1	21886	ENSMUST00000140433.7	-1130	ENSMUSG00000034771	transducin-like enhancer of split 2
Bdnf	8.36147	-0.965867	0.000211313	0.047008	Promoter (<=1kb)	109693918	109694317	2	109694409	109727007	32599	1	12064	ENSMUST00000111043.8	-92	ENSMUSG00000048482	brain derived neurotrophic factor
Trmt11	3.12719	2.4701	0.000224823	0.0476883	Distal Intergenic	30404027	30404426	10	30559121	30590109	30989	2	73681	ENSMUST00000215041.1	185683	ENSMUSG00000019792	tRNA methyltransferase 11
Efna5	3.87797	-2.2338	0.000226185	0.0476883	Intron (ENSMUST00000076840.11/13640, intron 1 of 4)	62735765	62736164	17	62607319	62881144	273826	2	13640	ENSMUST00000078839.4	144980	ENSMUSG00000048915	ephrin A5
B230323A14Rik	4.17627	-2.36176	0.000228352	0.0476883	Exon (ENSMUST00000180488.7/319970, exon 3 of 6)	69821371	69821770	9	69761146	69830199	69054	1	319970	ENSMUST00000180914.1	60225	ENSMUSG00000097623	RIKEN cDNA B230323A14 gene
Lrmda	5.51194	-1.48909	0.000250452	0.0512576	Intron (ENSMUST00000075639.10/76633, intron 5 of 6)	22742298	22742697	14	22596513	22599268	2756	1	76633	ENSMUST00000226003.1	145785	ENSMUSG00000063458	leucine rich melanocyte differentiation associated
Lrmda	4.11785	-1.80279	0.000271243	0.0544241	Intron (ENSMUST00000075639.10/76633, intron 5 of 6)	22724733	22725132	14	22596513	22599268	2756	1	76633	ENSMUST00000226003.1	128220	ENSMUSG00000063458	leucine rich melanocyte differentiation associated
Igdcc3	3.35445	1.93221	0.000278981	0.0548373	Promoter (<=1kb)	65141872	65142271	9	65141212	65185872	44661	1	19289	ENSMUST00000217371.1	660	ENSMUSG00000032394	immunoglobulin superfamily, DCC subclass, member 3
Mir9-3	4.00219	1.59208	0.000285135	0.0548373	Promoter (2-3kb)	79508019	79508418	7	79505264	79505353	90	1	723968	ENSMUST00000175497.1	2755	ENSMUSG00000093238	microRNA 9-3
Plekha6	3.65318	-2.50424	0.000289379	0.0548373	Intron (ENSMUST00000212252.1/240753, intron 3 of 9)	133194316	133194715	1	133181321	133301219	119899	1	240753	ENSMUST00000187285.6	12995	ENSMUSG00000041757	pleckstrin homology domain containing, family A member 6
Egln3	5.31241	-1.32245	0.000299106	0.0556501	Promoter (<=1kb)	54203132	54203531	12	54178981	54203860	24880	2	112407	ENSMUST00000039516.3	329	ENSMUSG00000035105	egl-9 family hypoxia-inducible factor 3
Sfta3-ps	4.46471	1.72905	0.000306537	0.0560142	Distal Intergenic	56463283	56463682	12	56488321	56493324	5004	2	104798	ENSMUST00000219680.1	29642	ENSMUSG00000112343	surfactant associated 3, pseudogene
Zfp532	5.34077	1.38198	0.000314121	0.056393	Intron (ENSMUST00000236404.1/ENSMUST00000236404.1, intron 2 of 3)	65527479	65527878	18	65579912	65689443	109532	1	328977	ENSMUST00000235822.1	-52034	ENSMUSG00000042439	zinc finger protein 532
Cdhr3	5.54381	-2.01895	0.000337204	0.0585174	Exon (ENSMUST00000095774.2/68764, exon 16 of 20)	33040064	33040463	12	33050786	33052986	2201	2	68764	ENSMUST00000219158.1	12523	ENSMUSG00000035860	cadherin-related family member 3
Rnf217	4.34386	-1.79716	0.000347815	0.0585174	Promoter (<=1kb)	31608236	31608635	10	31493193	31609184	115992	2	268291	ENSMUST00000081989.7	549	ENSMUSG00000063760	ring finger protein 217
Elf4	6.80818	-0.985472	0.000347921	0.0585174	Promoter (<=1kb)	48453000	48453399	20	48411046	48454169	43124	2	56501	ENSMUST00000114958.7	770	ENSMUSG00000031103	E74-like factor 4 (ets domain transcription factor)
Ebf1	4.72834	-1.59396	0.000348829	0.0585174	Intron (ENSMUST00000109268.1/13591, intron 6 of 15)	44741073	44741472	11	44621761	44643459	21699	1	13591	ENSMUST00000138452.1	119312	ENSMUSG00000057098	early B cell factor 1
9130015G15Rik	4.76974	1.37556	0.000355792	0.0587228	Intron (ENSMUST00000183659.7/78286, intron 2 of 39)	49068524	49068923	7	49122334	49134276	11943	2	108167511	ENSMUST00000208636.1	65353	NA	RIKEN cDNA 9130015G15 gene
Zfp608	4.31628	1.7271	0.000369124	0.0599563	Distal Intergenic	54825608	54826007	18	54892481	54895562	3082	2	269023	ENSMUST00000237009.1	69555	ENSMUSG00000052713	zinc finger protein 608
Csmd2	4.81108	1.30844	0.000381064	0.0609285	Promoter (<=1kb)	127986891	127987290	4	127987857	128339657	351801	1	329942	ENSMUST00000129619.7	-567	ENSMUSG00000028804	CUB and Sushi multiple domains 2
Ptprs	3.58219	1.78818	0.000419653	0.0660662	Promoter (<=1kb)	56473559	56473958	17	56454966	56474627	19662	2	19280	ENSMUST00000223742.1	669	ENSMUSG00000013236	protein tyrosine phosphatase, receptor type, S
Adcy7	6.51451	-1.21214	0.000430887	0.0662683	Promoter (<=1kb)	88272437	88272836	8	88272403	88329039	56637	1	11513	ENSMUST00000169037.8	34	ENSMUSG00000031659	adenylate cyclase 7
Tgfbr3	5.5315	-2.28765	0.000433888	0.0662683	Intron (ENSMUST00000031224.14/21814, intron 2 of 16)	107248741	107249140	5	107147980	107289595	141616	2	21814	ENSMUST00000146591.1	40455	ENSMUSG00000029287	transforming growth factor, beta receptor III
B130024G19Rik	3.16137	2.09358	0.000502365	0.075017	Distal Intergenic	70789279	70789678	7	70388305	70388842	538	1	434198	ENSMUST00000080024.5	400974	ENSMUSG00000100005	RIKEN cDNA B130024G19 gene
Dlx1	7.47165	1.08181	0.000514307	0.075017	Promoter (3-4kb)	71533954	71534353	2	71530780	71532689	1910	1	13390	ENSMUST00000172629.1	3174	ENSMUSG00000041911	distal-less homeobox 1
Prr5	4.15431	-1.57129	0.000515291	0.075017	Promoter (<=1kb)	84680889	84681288	15	84681002	84703672	22671	1	109270	ENSMUST00000065499.4	0	ENSMUSG00000036106	proline rich 5 (renal)
Mdm1	4.45735	-1.57242	0.000520493	0.075017	Distal Intergenic	118129134	118129533	10	118141811	118146760	4950	1	17245	ENSMUST00000219827.1	-12278	ENSMUSG00000020212	transformed mouse 3T3 cell double minute 1
Zfhx3	4.50963	-1.65077	0.000550697	0.0773453	Promoter (2-3kb)	107945147	107945546	8	107942644	108961630	1018987	1	11906	ENSMUST00000220518.1	2503	ENSMUSG00000038872	zinc finger homeobox 3
F730043M19Rik	4.86496	-1.36403	0.000551764	0.0773453	Promoter (<=1kb)	33147213	33147612	12	33111711	33147586	35876	2	320046	ENSMUST00000140105.7	0	ENSMUSG00000052125	RIKEN cDNA F730043M19 gene
Fbxw4	5.79727	1.11316	0.000593914	0.0814434	Promoter (4-5kb)	45598031	45598430	19	45578449	45593499	15051	2	30838	ENSMUST00000160018.7	-4532	ENSMUSG00000040913	F-box and WD-40 domain protein 4
Prdm16	4.24357	-1.54907	0.000596917	0.0814434	Intron (ENSMUST00000030902.12/70673, intron 2 of 16)	154499275	154499674	4	154476469	154528765	52297	2	70673	ENSMUST00000135064.1	29091	ENSMUSG00000039410	PR domain containing 16
Msrb3	4.90633	-1.72724	0.000648616	0.0873327	Promoter (<=1kb)	120899028	120899427	10	120781096	120899101	118006	2	320183	ENSMUST00000092143.11	0	ENSMUSG00000051236	methionine sulfoxide reductase B3
Wwc1	4.72761	-1.37877	0.00067626	0.0898723	Intron (ENSMUST00000102801.7/23964, intron 11 of 30)	36158728	36159127	11	35838400	35980527	142128	2	211652	ENSMUST00000018993.6	-178201	ENSMUSG00000018849	WW, C2 and coiled-coil domain containing 1
Lncbate1	5.2873	-1.62944	0.000709012	0.0922554	Intron (ENSMUST00000220518.1/11906, intron 3 of 15)	108449035	108449434	8	108553252	108584595	31344	2	109215	ENSMUST00000211953.1	135161	ENSMUSG00000110613	brown adipose tissue enriched long non-coding RNA 1
Six3	6.98701	-0.853156	0.000712223	0.0922554	Promoter (<=1kb)	85613956	85614355	17	85613608	85625222	11615	1	20473	ENSMUST00000175898.3	348	ENSMUSG00000038805	sine oculis-related homeobox 3
Smad2	6.85622	-0.796519	0.000729497	0.0933118	Distal Intergenic	76542731	76543130	18	76262492	76302642	40151	1	17126	ENSMUST00000113930.2	280239	ENSMUSG00000024563	SMAD family member 2
Tyw3	4.14075	-1.69447	0.00075639	0.0955573	Distal Intergenic	154470433	154470832	3	154579845	154594534	14690	2	209584	ENSMUST00000148680.2	123702	ENSMUSG00000047583	tRNA-yW synthesizing protein 3 homolog (S. cerevisiae)
Slit1	4.20691	1.17305	0.000767262	0.0957486	Promoter (<=1kb)	41742905	41743304	19	41646103	41743486	97384	2	20562	ENSMUST00000171586.1	182	ENSMUSG00000025020	slit guidance ligand 1
Prtg	4.24166	-1.80819	0.000813486	0.100294	Promoter (<=1kb)	72806594	72806993	9	72806874	72917291	110418	1	235472	ENSMUST00000055535.8	0	ENSMUSG00000036030	protogenin
4930548J01Rik	4.0133	-2.3848	0.000824263	0.100413	Distal Intergenic	4175422	4175821	17	4120217	4122113	1897	2	78043	ENSMUST00000231319.1	-53309	ENSMUSG00000116615	RIKEN cDNA 4930548J01 gene
Basp1	3.22091	-2.78092	0.000863473	0.103952	Exon (ENSMUST00000226199.1/ENSMUST00000226199.1, exon 5 of 5)	25286163	25286562	15	25364857	25413698	48842	2	70350	ENSMUST00000228597.1	127136	ENSMUSG00000045763	brain abundant, membrane attached signal protein 1
Pou3f1	6.8583	0.904614	0.000920243	0.109498	Promoter (1-2kb)	124658529	124658928	4	124656807	124660655	3849	1	18991	ENSMUST00000053491.8	1722	ENSMUSG00000090125	POU domain, class 3, transcription factor 1
Tgfbr3	3.57971	-2.72917	0.000959431	0.112849	Intron (ENSMUST00000031224.14/21814, intron 7 of 16)	107146317	107146716	5	107118197	107132923	14727	2	21814	ENSMUST00000136882.1	-13394	ENSMUSG00000029287	transforming growth factor, beta receptor III
Gli3	3.74639	-2.33788	0.000975245	0.113405	Intron (ENSMUST00000130065.7/14634, intron 4 of 11)	15622300	15622699	13	15463980	15730026	266047	1	14634	ENSMUST00000110510.3	158320	ENSMUSG00000021318	GLI-Kruppel family member GLI3
Thsd4	5.3272	1.22998	0.000994752	0.114374	Intron (ENSMUST00000171654.7/207596, intron 5 of 16)	60279036	60279435	9	59969719	60141220	171502	2	207596	ENSMUST00000034829.5	-137816	ENSMUSG00000032289	thrombospondin, type I, domain containing 4
Mir124-2hg	2.60704	-6.12882	0.0010133	0.115212	Distal Intergenic	17319252	17319651	3	17789921	17800073	10153	1	70441	ENSMUST00000188983.6	-470270	ENSMUSG00000100252	Mir124-2 host gene (non-protein coding)
Trhde	5.95887	-0.996915	0.00104356	0.117349	Promoter (<=1kb)	114800759	114801158	10	114398823	114801364	402542	2	237553	ENSMUST00000061632.7	206	ENSMUSG00000050663	TRH-degrading enzyme
Epha5	4.91902	1.48827	0.00106639	0.117381	Intron (ENSMUST00000053733.14/13839, intron 3 of 15)	84296301	84296700	5	84057791	84416806	359016	2	13839	ENSMUST00000113403.7	120106	ENSMUSG00000029245	Eph receptor A5
Slit3	4.49329	-1.40992	0.00106678	0.117381	Intron (ENSMUST00000069837.3/20564, intron 4 of 35)	35364821	35365220	11	35544685	35612636	67952	1	20564	ENSMUST00000124438.1	-179465	ENSMUSG00000056427	slit guidance ligand 3
Lingo1	3.32012	-3.44423	0.00108012	0.117583	Intron (ENSMUST00000210032.1/235402, intron 2 of 6)	56734545	56734944	9	56685190	56769123	83934	2	235402	ENSMUST00000210995.1	34179	ENSMUSG00000049556	leucine rich repeat and Ig domain containing 1
Acot11	3.71362	-2.58842	0.00109608	0.117855	Promoter (<=1kb)	106804829	106805228	4	106747235	106804998	57764	2	329910	ENSMUST00000065253.12	0	ENSMUSG00000034853	acyl-CoA thioesterase 11
Micall2	4.91668	-1.52467	0.00111957	0.117855	Distal Intergenic	139670299	139670698	5	139706886	139710227	3342	2	231830	ENSMUST00000164584.2	39529	ENSMUSG00000036718	MICAL-like 2
Cmtm7	3.96968	-1.63827	0.00113257	0.117855	Promoter (<=1kb)	114781475	114781874	9	114756836	114781849	25014	2	102545	ENSMUST00000035009.15	0	ENSMUSG00000032436	CKLF-like MARVEL transmembrane domain containing 7
Gli2	7.4807	-0.965095	0.00113698	0.117855	Promoter (1-2kb)	119051780	119052179	1	118848460	119053339	204880	2	14633	ENSMUST00000159839.7	1160	ENSMUSG00000048402	GLI-Kruppel family member GLI2
Vgll4	6.77244	-0.766218	0.0011402	0.117855	Promoter (<=1kb)	114968480	114968879	6	114862321	114969180	106860	2	232334	ENSMUST00000147639.7	301	ENSMUSG00000030315	vestigial like family member 4
Ntrk2	5.70468	0.911188	0.00115552	0.118244	Promoter (<=1kb)	58808392	58808791	13	58808691	58888479	79789	1	18212	ENSMUST00000225583.1	0	ENSMUSG00000055254	neurotrophic tyrosine kinase, receptor, type 2
Nid2	5.73369	-1.03135	0.00119433	0.121006	Promoter (<=1kb)	19751996	19752395	14	19751284	19806130	54847	1	18074	ENSMUST00000225791.1	712	ENSMUSG00000021806	nidogen 2
Prlhr	6.92932	-0.777499	0.00120694	0.121085	Promoter (<=1kb)	60467246	60467645	19	60466732	60468304	1573	2	226278	ENSMUST00000051277.3	659	ENSMUSG00000045052	prolactin releasing hormone receptor
Gm973	5.53146	-1.0504	0.00123081	0.122151	Intron (ENSMUST00000114243.7/381260, intron 12 of 19)	59592162	59592561	1	59582396	59607805	25410	1	381260	ENSMUST00000212835.1	9766	ENSMUSG00000047361	predicted gene 973
Bub3	3.68608	-2.26756	0.00124172	0.122151	Intron (ENSMUST00000124096.7/14183, intron 2 of 6)	131594247	131594646	7	131560710	131571164	10455	1	12237	ENSMUST00000207442.1	33537	ENSMUSG00000066979	BUB3 mitotic checkpoint protein
Echdc3	4.67837	1.20288	0.00125338	0.122151	Intron (ENSMUST00000151782.1/320132, intron 3 of 6)	6258053	6258452	2	6188465	6213033	24569	2	67856	ENSMUST00000042658.4	-45020	ENSMUSG00000039063	enoyl Coenzyme A hydratase domain containing 3
Eno4	4.70334	-1.19229	0.0012736	0.122951	Intron (ENSMUST00000054280.9/226265, intron 11 of 13)	58967853	58968252	19	58955456	58970933	15478	1	226265	ENSMUST00000201123.1	12397	ENSMUSG00000048029	enolase 4
Nnmt	4.24415	-1.81496	0.00129161	0.123038	Intron (ENSMUST00000093852.4/235320, intron 4 of 6)	48675272	48675671	9	48591877	48605153	13277	2	18113	ENSMUST00000119426.1	-70119	ENSMUSG00000032271	nicotinamide N-methyltransferase
Ebf1	6.70889	-0.894201	0.00129912	0.123038	Intron (ENSMUST00000109268.1/13591, intron 6 of 15)	44791320	44791719	11	44912138	44972914	60777	1	13591	ENSMUST00000140822.1	-120419	ENSMUSG00000057098	early B cell factor 1
Snx20	3.88611	-1.68468	0.00131058	0.123038	Exon (ENSMUST00000034087.8/71607, exon 4 of 4)	88626878	88627277	8	88626563	88636128	9566	2	71607	ENSMUST00000034087.8	8851	ENSMUSG00000031662	sorting nexin 20
Tjp2	5.69091	-1.24895	0.00136753	0.126281	Promoter (<=1kb)	24224504	24224903	19	24094523	24225026	130504	2	21873	ENSMUST00000099558.4	123	ENSMUSG00000024812	tight junction protein 2
9130019P16Rik	6.90759	-0.800066	0.00137449	0.126281	Promoter (<=1kb)	54327015	54327414	6	54302652	54327341	24690	2	100042056	ENSMUST00000185712.1	0	ENSMUSG00000073067	RIKEN cDNA 9130019P16 gene
Dusp6	4.40192	-1.52742	0.00138463	0.126281	Promoter (<=1kb)	99264333	99264732	10	99264277	99266044	1768	1	67603	ENSMUST00000219988.1	56	ENSMUSG00000019960	dual specificity phosphatase 6
Dlx6os1	7.4465	0.974465	0.00139448	0.126281	Promoter (4-5kb)	6875823	6876222	6	6820543	6871592	51050	2	320038	ENSMUST00000159568.5	-4231	ENSMUSG00000090063	distal-less homeobox 6, opposite strand 1
Tcf15	6.15885	-0.88498	0.00148439	0.133244	Promoter (<=1kb)	152143655	152144054	2	152143561	152149097	5537	1	21407	ENSMUST00000089112.5	94	ENSMUSG00000068079	transcription factor 15
Foxp1	2.98003	-4.00096	0.00151173	0.134518	Distal Intergenic	98771261	98771660	6	98930171	98935545	5375	2	108655	ENSMUST00000175880.1	163885	ENSMUSG00000030067	forkhead box P1
Lyzl1	4.08872	1.18004	0.00155497	0.135852	Distal Intergenic	3837750	3838149	18	4165832	4182232	16401	1	67328	ENSMUST00000025076.9	-327683	ENSMUSG00000024233	lysozyme-like 1
Itga4	3.80641	-1.60456	0.00156639	0.135852	Promoter (<=1kb)	79255704	79256103	2	79255721	79293273	37553	1	16401	ENSMUST00000135919.7	0	ENSMUSG00000027009	integrin alpha 4
Pcdhgc3	2.9437	2.04799	0.00156656	0.135852	Promoter (1-2kb)	37808073	37808472	18	37806416	37841873	35458	1	93706	ENSMUST00000192103.1	1657	ENSMUSG00000102918	protocadherin gamma subfamily C, 3
Mir9-3hg	4.91121	1.07727	0.00163829	0.136744	Exon (ENSMUST00000206829.1/ENSMUST00000206829.1, exon 2 of 2)	79555494	79555893	7	79527850	79532044	4195	1	101694	ENSMUST00000182125.1	27644	ENSMUSG00000097023	Mir9-3 host gene
Iqch	3.9527	-2.80225	0.00165038	0.136744	Intron (ENSMUST00000126238.2/ENSMUST00000126238.2, intron 3 of 4)	63507350	63507749	9	63421835	63602417	180583	2	78250	ENSMUST00000171243.1	94668	ENSMUSG00000037801	IQ motif containing H
Gpr50	7.1729	0.682306	0.00165234	0.136744	Promoter (<=1kb)	71664505	71664904	20	71663966	71667392	3427	1	14765	ENSMUST00000144712.6	539	ENSMUSG00000056380	G-protein-coupled receptor 50
Plekha6	6.75952	-0.764499	0.00166629	0.136744	Promoter (<=1kb)	133163835	133164234	1	133164210	133272280	108071	1	240753	ENSMUST00000212252.1	0	ENSMUSG00000041757	pleckstrin homology domain containing, family A member 6
Zfp608	3.53135	1.46923	0.00167172	0.136744	Exon (ENSMUST00000195736.1/ENSMUST00000195736.1, exon 1 of 1)	55143336	55143735	18	54888723	54992555	103833	2	269023	ENSMUST00000237844.1	-150781	ENSMUSG00000052713	zinc finger protein 608
Zfhx3	3.61626	-1.95771	0.0016791	0.136744	Intron (ENSMUST00000220518.1/11906, intron 1 of 15)	108085319	108085718	8	107942644	108961630	1018987	1	11906	ENSMUST00000220518.1	142675	ENSMUSG00000038872	zinc finger homeobox 3
Nampt	6.2022	-0.880486	0.00168021	0.136744	Distal Intergenic	32635286	32635685	12	32819545	32839207	19663	1	59027	ENSMUST00000220200.1	-183860	ENSMUSG00000020572	nicotinamide phosphoribosyltransferase
Camk2b	4.2275	-1.66548	0.00168374	0.136744	Intron (ENSMUST00000109813.8/12323, intron 3 of 20)	6007295	6007694	11	5990395	6000448	10054	2	12323	ENSMUST00000130427.7	-6847	ENSMUSG00000057897	calcium/calmodulin-dependent protein kinase II, beta
Mecom	4.12697	-1.55348	0.00173531	0.139288	Promoter (<=1kb)	30012166	30012565	3	29983961	30013061	29101	2	14013	ENSMUST00000170212.7	496	ENSMUSG00000027684	MDS1 and EVI1 complex locus
Pcdh10	4.44734	1.25959	0.00174229	0.139288	Promoter (1-2kb)	45380206	45380605	3	45378427	45423711	45285	1	18526	ENSMUST00000170695.3	1779	ENSMUSG00000049100	protocadherin 10
Lrmda	4.70368	1.13765	0.00182751	0.144041	Intron (ENSMUST00000075639.10/76633, intron 5 of 6)	22683084	22683483	14	22596513	22599268	2756	1	76633	ENSMUST00000226003.1	86571	ENSMUSG00000063458	leucine rich melanocyte differentiation associated
Resp18	4.77973	-1.45279	0.0018299	0.144041	Promoter (<=1kb)	75277432	75277831	1	75274070	75278284	4215	2	19711	ENSMUST00000189203.1	453	ENSMUSG00000033061	regulated endocrine-specific protein 18
Mir3093	7.75954	1.2647	0.00186777	0.144736	Promoter (<=1kb)	88215016	88215415	3	88215171	88215257	87	1	100526540	ENSMUST00000175247.1	0	ENSMUSG00000092988	microRNA 3093
Eno4	4.94585	-1.20027	0.00187178	0.144736	Exon (ENSMUST00000237297.1/73442, exon 2 of 7)	58931717	58932116	19	58943425	58971419	27995	1	226265	ENSMUST00000054280.9	-11309	ENSMUSG00000048029	enolase 4
Zfp608	5.67643	0.995983	0.00188154	0.144736	Distal Intergenic	54758768	54759167	18	54892481	54895562	3082	2	269023	ENSMUST00000237009.1	136395	ENSMUSG00000052713	zinc finger protein 608
Ripply1	2.57211	2.7964	0.0018953	0.144736	Distal Intergenic	139775091	139775490	20	139779549	139782353	2805	2	622473	ENSMUST00000101217.3	6863	ENSMUSG00000072945	ripply transcriptional repressor 1
Rbm20	7.42836	-0.860705	0.001929	0.145542	Promoter (<=1kb)	53677015	53677414	19	53677306	53865380	188075	1	73713	ENSMUST00000164202.8	0	ENSMUSG00000043639	RNA binding motif protein 20
Gja4	4.47471	-1.41347	0.0019343	0.145542	Promoter (1-2kb)	127312205	127312604	4	127311421	127314039	2619	2	14612	ENSMUST00000053753.7	1435	ENSMUSG00000050234	gap junction protein, alpha 4
Arx	6.0369	1.11345	0.00199265	0.148838	Intron (ENSMUST00000046565.12/11878, intron 4 of 4)	93296563	93296962	20	93286510	93298062	11553	1	11878	ENSMUST00000113947.5	10053	ENSMUSG00000035277	aristaless related homeobox
Tubb6	6.48875	-0.845962	0.00202449	0.149496	Promoter (<=1kb)	67390261	67390660	18	67390717	67402749	12033	1	67951	ENSMUST00000001513.7	-57	ENSMUSG00000001473	tubulin, beta 6 class V
Pfn3	6.70766	-0.789185	0.00203385	0.149496	Exon (ENSMUST00000021948.14/58992, exon 10 of 14)	55420545	55420944	13	55414688	55415232	545	2	75477	ENSMUST00000054146.4	-5313	ENSMUSG00000044444	profilin 3
4933407E24Rik	4.32932	1.05539	0.0020655	0.149496	Intron (ENSMUST00000184062.1/ENSMUST00000184062.1, intron 1 of 1)	124574908	124575307	4	124569190	124574645	5456	1	108809	ENSMUST00000133499.1	5718	NA	RIKEN cDNA 4933407E24 gene
4933427D06Rik	3.83751	-2.67269	0.00207264	0.149496	Intron (ENSMUST00000168837.6/232217, intron 1 of 2)	89021770	89022169	6	88950683	89110030	159348	1	232217	ENSMUST00000168837.6	71087	ENSMUSG00000055403	RIKEN cDNA 4933427D06 gene
Hmga2	4.78813	-1.2441	0.00207451	0.149496	Distal Intergenic	120552698	120553097	10	120361275	120476469	115195	2	15364	ENSMUST00000159699.1	-76229	ENSMUSG00000056758	high mobility group AT-hook 2
Ahi1	3.16105	1.89312	0.00216542	0.154099	Distal Intergenic	21091726	21092125	10	21069845	21074406	4562	1	52906	ENSMUST00000215543.1	21881	ENSMUSG00000019986	Abelson helper integration site 1
Kcng1	6.51078	-0.812669	0.0021685	0.154099	Promoter (<=1kb)	168281243	168281642	2	168260117	168281132	21016	2	241794	ENSMUST00000109191.1	-111	ENSMUSG00000074575	potassium voltage-gated channel, subfamily G, member 1
Prkcd	4.66045	-1.3468	0.00222214	0.155947	Promoter (<=1kb)	30625393	30625792	14	30600262	30626172	25911	2	18753	ENSMUST00000130736.7	380	ENSMUSG00000021948	protein kinase C, delta
Podxl2	3.17003	1.6559	0.00223106	0.155947	Promoter (<=1kb)	88873886	88874285	6	88842565	88874045	31481	2	319655	ENSMUST00000038409.11	0	ENSMUSG00000033152	podocalyxin-like 2
Prmt8	6.92608	-0.637695	0.00225158	0.155947	Promoter (1-2kb)	127767870	127768269	6	127689011	127769472	80462	2	381813	ENSMUST00000032500.8	1203	ENSMUSG00000030350	protein arginine N-methyltransferase 8
Maf	4.26143	-1.35229	0.00226202	0.155947	Promoter (1-2kb)	115705771	115706170	8	115701435	115707794	6360	2	17132	ENSMUST00000109104.1	1624	ENSMUSG00000055435	avian musculoaponeurotic fibrosarcoma oncogene homolog
Fezf1	7.584	-0.671427	0.00229905	0.155947	Distal Intergenic	23253901	23254300	6	23245044	23248362	3319	2	73191	ENSMUST00000031709.6	-5539	ENSMUSG00000029697	Fez family zinc finger 1
Fblim1	5.77011	-0.929374	0.00230991	0.155947	Promoter (<=1kb)	141599354	141599753	4	141589298	141599835	10538	2	74202	ENSMUST00000141518.7	82	ENSMUSG00000006219	filamin binding LIM protein 1
Col4a6	1.4666	3.83208	0.00231165	0.155947	Intron (ENSMUST00000101205.2/94216, intron 3 of 44)	141287147	141287546	20	141186191	141207602	21412	2	94216	ENSMUST00000137051.7	-79545	ENSMUSG00000031273	collagen, type IV, alpha 6
Shroom2	3.56614	1.72253	0.00231643	0.155947	Promoter (<=1kb)	152769408	152769807	20	152609509	152769461	159953	2	110380	ENSMUST00000101141.8	0	ENSMUSG00000045180	shroom family member 2
Dach1	4.02154	1.38084	0.00236194	0.157972	Intron (ENSMUST00000069334.7/13134, intron 1 of 10)	98066093	98066492	14	97786853	98169543	382691	2	13134	ENSMUST00000069334.7	103051	ENSMUSG00000055639	dachshund family transcription factor 1
Reps2	2.3622	3.40567	0.00239233	0.158047	Intron (ENSMUST00000154424.7/194590, intron 12 of 15)	162458091	162458490	20	162546220	162552579	6360	2	194590	ENSMUST00000155043.1	94089	ENSMUSG00000040855	RALBP1 associated Eps domain containing protein 2
Lrmda	5.89103	-0.97087	0.00239395	0.158047	Intron (ENSMUST00000075639.10/76633, intron 5 of 6)	22808347	22808746	14	22596513	22599268	2756	1	76633	ENSMUST00000226003.1	211834	ENSMUSG00000063458	leucine rich melanocyte differentiation associated
Xkr6	3.13718	1.7613	0.00244256	0.158321	Distal Intergenic	63584975	63585374	14	63606503	63820809	214307	1	219149	ENSMUST00000119973.2	-21129	ENSMUSG00000035067	X-linked Kx blood group related 6
Gm6249	4.50913	-1.52461	0.00244415	0.158321	Distal Intergenic	136583426	136583825	7	136667955	136710604	42650	2	621677	ENSMUST00000211142.1	126779	ENSMUSG00000110101	predicted gene 6249
Fzd10os	5.15741	-1.21514	0.00248213	0.158321	Distal Intergenic	128551642	128552041	5	128579106	128585378	6273	2	319616	ENSMUST00000140028.7	33337	ENSMUSG00000072591	frizzled class receptor 10, opposite strand
Cacna2d2	3.65839	-2.25651	0.0024866	0.158321	Intron (ENSMUST00000010210.12/56808, intron 3 of 37)	107472086	107472485	9	107505604	107513534	7931	1	56808	ENSMUST00000169354.7	-33119	ENSMUSG00000010066	calcium channel, voltage-dependent, alpha 2/delta subunit 2
Shox2	4.49787	-1.18489	0.00249304	0.158321	Distal Intergenic	66746977	66747376	3	66972780	66978447	5668	2	20429	ENSMUST00000162060.8	231071	ENSMUSG00000027833	short stature homeobox 2
Adgre5	5.30581	-1.05144	0.00249506	0.158321	Promoter (<=1kb)	83741275	83741674	8	83723251	83741326	18076	2	26364	ENSMUST00000002964.13	0	ENSMUSG00000002885	adhesion G protein-coupled receptor E5
Dpysl5	3.25134	1.61531	0.0025064	0.158321	Promoter (<=1kb)	30712199	30712598	5	30711901	30748014	36114	1	65254	ENSMUST00000101442.3	298	ENSMUSG00000029168	dihydropyrimidinase-like 5
Kirrel3	2.2261	-5.75472	0.00252724	0.158658	Intron (ENSMUST00000115148.8/67703, intron 2 of 16)	34554742	34555141	9	34488936	35036310	547375	1	67703	ENSMUST00000187182.6	65806	ENSMUSG00000032036	kirre like nephrin family adhesion molecule 3
Gm14812	2.66893	2.80433	0.00259323	0.159456	Distal Intergenic	99398194	99398593	20	99405331	99443797	38467	2	100038584	ENSMUST00000156494.1	45204	ENSMUSG00000073051	predicted gene 14812
Lef1	4.17352	-1.4753	0.00259365	0.159456	Distal Intergenic	131084966	131085365	3	131110471	131224356	113886	1	16842	ENSMUST00000029611.13	-25106	ENSMUSG00000027985	lymphoid enhancer binding factor 1
Slit3	4.78986	-1.10042	0.00260471	0.159456	Promoter (<=1kb)	35544548	35544947	11	35544685	35612636	67952	1	20564	ENSMUST00000124438.1	0	ENSMUSG00000056427	slit guidance ligand 3
B230323A14Rik	5.28647	-1.36162	0.00261686	0.159456	Distal Intergenic	69716435	69716834	9	69758740	69830845	72106	1	319970	ENSMUST00000180488.7	-41906	ENSMUSG00000097623	RIKEN cDNA B230323A14 gene
Lingo1	8.07854	-0.831841	0.00261787	0.159456	Promoter (<=1kb)	56796537	56796936	9	56674444	56796468	122025	2	235402	ENSMUST00000209332.1	-69	ENSMUSG00000049556	leucine rich repeat and Ig domain containing 1
Fignl2	3.18448	-3.31923	0.0026419	0.159968	Intron (ENSMUST00000213610.1/ENSMUST00000213610.1, intron 1 of 1)	101077373	101077772	15	101050194	101054399	4206	2	668225	ENSMUST00000178140.1	-22974	ENSMUSG00000095440	fidgetin-like 2
Hap1	2.51003	2.41554	0.00266249	0.160267	Promoter (<=1kb)	100356415	100356814	11	100347327	100356128	8802	2	15114	ENSMUST00000138603.8	-287	ENSMUSG00000006930	huntingtin-associated protein 1
Armcx2	1.26156	4.37234	0.00269109	0.161041	Distal Intergenic	134788477	134788876	20	134806485	134807511	1027	2	67416	ENSMUST00000150814.1	18635	ENSMUSG00000033436	armadillo repeat containing, X-linked 2
Mir672	2.19836	3.56598	0.00281333	0.167377	Intron (ENSMUST00000118314.7/245555, intron 1 of 2)	104127532	104127931	20	104116175	104116274	100	2	751535	ENSMUST00000102331.1	-11258	ENSMUSG00000076286	microRNA 672
Egfl6	1.2314	4.34011	0.00284646	0.167909	Distal Intergenic	166616962	166617361	20	166523007	166585720	62714	2	54156	ENSMUST00000000412.2	-31242	ENSMUSG00000000402	EGF-like-domain, multiple 6
BC034090	4.6955	-1.24954	0.00288299	0.167909	Promoter (<=1kb)	155244064	155244463	1	155212471	155244444	31974	2	207792	ENSMUST00000186156.6	0	ENSMUSG00000033722	cDNA sequence BC034090
Tyw3	3.91466	-1.71414	0.00288602	0.167909	Distal Intergenic	154466570	154466969	3	154579845	154594534	14690	2	209584	ENSMUST00000148680.2	127565	ENSMUSG00000047583	tRNA-yW synthesizing protein 3 homolog (S. cerevisiae)
Slc35d2	4.89025	1.21795	0.00288791	0.167909	Promoter (2-3kb)	64104054	64104453	13	64097141	64107163	10023	2	70484	ENSMUST00000221572.1	2710	ENSMUSG00000033114	solute carrier family 35, member D2
Parp12	5.80044	-0.993002	0.00293732	0.169243	Promoter (<=1kb)	39117554	39117953	6	39086410	39118349	31940	2	243771	ENSMUST00000038398.6	396	ENSMUSG00000038507	poly (ADP-ribose) polymerase family, member 12
Lin28b	2.73057	-3.76272	0.00294394	0.169243	Promoter (3-4kb)	45473533	45473932	10	45376620	45470201	93582	2	380669	ENSMUST00000079390.6	-3332	ENSMUSG00000063804	lin-28 homolog B (C. elegans)
Zfp507	2.71518	-3.69402	0.00304177	0.173891	Distal Intergenic	36069024	36069423	7	35772343	35802989	30647	2	668501	ENSMUST00000061586.10	-266035	ENSMUSG00000044452	zinc finger protein 507
4931429P17Rik	2.81667	-2.95323	0.00313335	0.177347	Intron (ENSMUST00000180921.1/320614, intron 1 of 2)	48105550	48105949	13	47960330	48018608	58279	2	70971	ENSMUST00000061899.5	-86942	ENSMUSG00000047324	RIKEN cDNA 4931429P17 gene
Gpm6b	2.16798	3.52736	0.00314918	0.177347	Intron (ENSMUST00000112235.7/14758, intron 1 of 6)	166276295	166276694	20	166238972	166388988	150017	1	14758	ENSMUST00000112233.7	37323	ENSMUSG00000031342	glycoprotein m6b
Itpkb	4.91064	-1.26605	0.0031695	0.177347	Promoter (1-2kb)	180331502	180331901	1	180330485	180424802	94318	1	320404	ENSMUST00000070181.6	1017	ENSMUSG00000038855	inositol 1,4,5-trisphosphate 3-kinase B
1700122O11Rik	4.35331	-1.16848	0.00317156	0.177347	Promoter (3-4kb)	48041722	48042121	17	48036745	48038293	1549	2	76651	ENSMUST00000178823.1	-3429	ENSMUSG00000094928	RIKEN cDNA 1700122O11 gene
Fndc1	4.98157	-1.034	0.00320455	0.177468	Promoter (<=1kb)	7826866	7827265	17	7782444	7827302	44859	2	68655	ENSMUST00000167580.7	37	ENSMUSG00000071984	fibronectin type III domain containing 1
Enpp6	5.02338	-0.981067	0.00321671	0.177468	Distal Intergenic	46903496	46903895	8	46986887	47096762	109876	1	320981	ENSMUST00000039840.14	-82992	ENSMUSG00000038173	ectonucleotide pyrophosphatase/phosphodiesterase 6
Dhx58	4.17802	-1.25954	0.00322574	0.177468	Promoter (4-5kb)	100691795	100692194	11	100695063	100696620	1558	2	80861	ENSMUST00000140543.1	4426	ENSMUSG00000017830	DEXH (Asp-Glu-X-His) box polypeptide 58
Rora	4.14394	-1.41816	0.00332002	0.181678	Intron (ENSMUST00000034766.13/19883, intron 1 of 10)	68699490	68699889	9	68655303	68664180	8878	1	19883	ENSMUST00000143507.1	44187	ENSMUSG00000032238	RAR-related orphan receptor alpha
Meis2	6.1786	-0.840509	0.00337572	0.183525	Distal Intergenic	115852904	115853303	2	115864227	115868867	4641	2	17536	ENSMUST00000189640.6	15564	ENSMUSG00000027210	Meis homeobox 2
4930405A10Rik	3.26455	-2.79943	0.00338965	0.183525	Intron (ENSMUST00000075639.10/76633, intron 2 of 6)	22495107	22495506	14	22507174	22542798	35625	2	74896	ENSMUST00000225327.1	47292	ENSMUSG00000114412	RIKEN cDNA 4930405A10 gene
Tle1	2.56483	-3.5968	0.00346683	0.186716	Distal Intergenic	72388169	72388568	4	72117142	72200919	83778	2	21885	ENSMUST00000074216.13	-187250	ENSMUSG00000008305	transducin-like enhancer of split 1
Acsl4	3.3547	1.99825	0.00352257	0.188725	Promoter (<=1kb)	142390245	142390644	20	142317993	142390344	72352	2	50790	ENSMUST00000112907.7	0	ENSMUSG00000031278	acyl-CoA synthetase long-chain family member 4
Efcc1	7.12752	-0.754119	0.00354709	0.189049	Promoter (<=1kb)	87731922	87732321	6	87732809	87751896	19088	1	58229	ENSMUST00000159956.1	-488	ENSMUSG00000068263	EF hand and coiled-coil domain containing 1
Gm5424	6.36933	-0.855675	0.00373313	0.195595	Promoter (<=1kb)	31497741	31498140	2	31497772	31510155	12384	1	432466	ENSMUST00000126474.6	0	ENSMUSG00000046687	argininosuccinate synthase pseudogene
B3gnt6	7.29065	0.634717	0.00373674	0.195595	Exon (ENSMUST00000098278.3/272411, exon 2 of 2)	98193753	98194152	7	98192417	98199481	7065	2	272411	ENSMUST00000098278.3	5329	ENSMUSG00000074004	UDP-GlcNAc:betaGal beta-1,3-N-acetylglucosaminyltransferase 6 (core 3 synthase)
Foxp4	4.13705	-1.56648	0.00373999	0.195595	Distal Intergenic	47946898	47947297	17	47867133	47924645	57513	2	74123	ENSMUST00000113265.7	-22253	ENSMUSG00000023991	forkhead box P4
Rcsd1	4.81293	-1.11061	0.00374637	0.195595	Promoter (<=1kb)	165707717	165708116	1	165646516	165708086	61571	2	226594	ENSMUST00000097474.8	0	ENSMUSG00000040723	RCSD domain containing 1
Hhipl1	6.2227	-1.0152	0.00384219	0.199579	Exon (ENSMUST00000021685.7/214305, exon 4 of 9)	108318310	108318709	12	108306548	108326608	20061	1	214305	ENSMUST00000223395.1	11762	ENSMUSG00000021260	hedgehog interacting protein-like 1
Rbm28	7.29348	-0.670421	0.00388051	0.200422	Exon (ENSMUST00000159200.1/101359, exon 5 of 5)	29170425	29170824	6	29123576	29165006	41431	2	68272	ENSMUST00000007993.15	-5419	ENSMUSG00000029701	RNA binding motif protein 28
Ndnf	5.0094	-1.13169	0.00389759	0.200422	Promoter (<=1kb)	65672550	65672949	6	65671590	65712326	40737	1	68169	ENSMUST00000054351.5	960	ENSMUSG00000049001	neuron-derived neurotrophic factor
Kcnj8	6.66825	-0.751393	0.00393261	0.20052	Promoter (<=1kb)	142571041	142571440	6	142564839	142571371	6533	2	16523	ENSMUST00000032374.8	0	ENSMUSG00000030247	potassium inwardly-rectifying channel, subfamily J, member 8
Sult2b1	1.29021	3.63508	0.00393869	0.20052	Promoter (2-3kb)	45739776	45740175	7	45730000	45742483	12484	2	54200	ENSMUST00000210754.1	2308	ENSMUSG00000003271	sulfotransferase family, cytosolic, 2B, member 1
D730050B12Rik	6.57143	0.863437	0.00398124	0.201684	Distal Intergenic	73037900	73038299	13	72809601	72816763	7163	2	78446	ENSMUST00000223149.1	-221137	ENSMUSG00000113082	RIKEN cDNA D730050B12 gene
Khdc3	5.0973	-1.1075	0.00404692	0.204	Promoter (<=1kb)	73103000	73103399	9	73102510	73104192	1683	1	66991	ENSMUST00000167514.1	490	ENSMUSG00000092622	KH domain containing 3, subcortical maternal complex member
Syt15	4.74922	-0.976485	0.00408527	0.204139	Promoter (<=1kb)	34219796	34220195	14	34220046	34227740	7695	1	319508	ENSMUST00000119693.7	0	ENSMUSG00000041479	synaptotagmin XV
Huwe1	0.595248	5.39648	0.00408957	0.204139	Intron (ENSMUST00000153687.7/59026, intron 2 of 24)	151821059	151821458	20	151835248	151935417	100170	1	59026	ENSMUST00000112622.7	-13790	ENSMUSG00000025261	HECT, UBA and WWE domain containing 1
Cldn34a	3.86737	2.31374	0.00416076	0.206685	Exon (ENSMUST00000120079.1/ENSMUST00000120079.1, exon 1 of 1)	152544582	152544981	20	152563334	152563969	636	1	635396	ENSMUST00000164764.1	-18353	ENSMUSG00000091863	claudin 34A
Fbxo17	3.57298	-1.67502	0.0042093	0.207244	Promoter (<=1kb)	28732487	28732886	7	28732500	28737482	4983	1	50760	ENSMUST00000167118.1	0	ENSMUSG00000030598	F-box protein 17
Islr2	8.27678	-0.707364	0.00421251	0.207244	Promoter (1-2kb)	58199098	58199497	9	58199437	58200572	1136	2	320563	ENSMUST00000217050.1	1075	ENSMUSG00000051243	immunoglobulin superfamily containing leucine-rich repeat 2
Cacnb3	4.56942	1.00195	0.00436727	0.212784	Promoter (<=1kb)	98632279	98632678	15	98632376	98644529	12154	1	12297	ENSMUST00000109150.8	0	ENSMUSG00000003352	calcium channel, voltage-dependent, beta 3 subunit
Atoh8	5.19457	-0.972455	0.00437058	0.212784	Promoter (<=1kb)	72235708	72236107	6	72206177	72235577	29401	2	71093	ENSMUST00000042646.7	-131	ENSMUSG00000037621	atonal bHLH transcription factor 8
Foxo3	6.42054	-0.769716	0.00438752	0.212784	Promoter (1-2kb)	42274611	42275010	10	42196268	42276696	80429	2	56484	ENSMUST00000175881.7	1686	ENSMUSG00000048756	forkhead box O3
Sntb2	2.55957	-3.57731	0.00448268	0.216374	Promoter (1-2kb)	106937398	106937797	8	106936149	106981744	45596	1	20650	ENSMUST00000212298.1	1249	ENSMUSG00000041308	syntrophin, basic 2
Kcnj1	6.55395	0.674701	0.0045184	0.217074	Distal Intergenic	32409004	32409403	9	32393985	32399197	5213	1	56379	ENSMUST00000172015.2	15019	ENSMUSG00000041248	potassium inwardly-rectifying channel, subfamily J, member 1
Slc6a1	3.82856	1.19461	0.00454296	0.217234	Promoter (<=1kb)	114282740	114283139	6	114282790	114307118	24329	1	232333	ENSMUST00000204600.2	0	ENSMUSG00000030310	solute carrier family 6 (neurotransmitter transporter, GABA), member 1
A4galt	7.08513	-0.664026	0.00456723	0.217379	Promoter (<=1kb)	83251231	83251630	15	83228333	83251729	23397	2	239559	ENSMUST00000229687.1	99	ENSMUSG00000047878	alpha 1,4-galactosyltransferase
Rora	6.8275	-0.640774	0.00470997	0.221126	Promoter (<=1kb)	69290663	69291062	9	69289682	69379809	90128	1	19883	ENSMUST00000113624.2	981	ENSMUSG00000032238	RAR-related orphan receptor alpha
Grpr	1.50249	3.78033	0.00472305	0.221126	Distal Intergenic	163561431	163561830	20	163513904	163549677	35774	2	14829	ENSMUST00000033730.2	-11754	ENSMUSG00000031364	gastrin releasing peptide receptor
Mid2	4.53698	1.85057	0.00473726	0.221126	Promoter (<=1kb)	140664415	140664814	20	140664599	140678708	14110	1	23947	ENSMUST00000128809.1	0	ENSMUSG00000000266	midline 2
Runx1t1	4.2036	1.00898	0.00474233	0.221126	Promoter (<=1kb)	13743753	13744152	4	13743436	13893649	150214	1	12395	ENSMUST00000006761.9	317	ENSMUSG00000006586	RUNX1 translocation partner 1
Efna5	2.82379	-2.91574	0.004754	0.221126	Promoter (1-2kb)	62879479	62879878	17	62607319	62881144	273826	2	13640	ENSMUST00000078839.4	1266	ENSMUSG00000048915	ephrin A5
Dcx	1.83864	3.58205	0.00484885	0.222564	Intron (ENSMUST00000033642.9/13193, intron 3 of 6)	143910478	143910877	20	143869210	143933050	63841	2	13193	ENSMUST00000139920.7	22173	ENSMUSG00000031285	doublecortin
Fzd9	4.68704	-0.976368	0.00484966	0.222564	Promoter (<=1kb)	135250493	135250892	5	135248938	135251230	2293	2	14371	ENSMUST00000062572.2	338	ENSMUSG00000049551	frizzled class receptor 9
Upp1	6.4958	-0.704975	0.00485457	0.222564	Promoter (<=1kb)	9118644	9119043	11	9118787	9133251	14465	1	22271	ENSMUST00000172452.7	0	ENSMUSG00000020407	uridine phosphorylase 1
Ppp1r36	4.39789	-1.05714	0.00487813	0.222564	Promoter (<=1kb)	76417615	76418014	12	76417621	76439480	21860	1	210762	ENSMUST00000218732.1	0	ENSMUSG00000052221	protein phosphatase 1, regulatory subunit 36
Zfp703	5.03464	-1.08606	0.0048966	0.222564	Promoter (1-2kb)	26979359	26979758	8	26978185	26978692	508	1	353310	ENSMUST00000209411.1	1174	ENSMUSG00000085795	zinc finger protein 703
Arhgap6	3.32877	2.35998	0.00491543	0.222564	Promoter (<=1kb)	169035946	169036345	20	169036611	169251527	214917	1	11856	ENSMUST00000143048.1	-266	ENSMUSG00000031355	Rho GTPase activating protein 6
Grpr	1.40017	4.51981	0.00500991	0.225843	Distal Intergenic	163379041	163379440	20	163513904	163549677	35774	2	14829	ENSMUST00000033730.2	170237	ENSMUSG00000031364	gastrin releasing peptide receptor
Hrh1	4.80243	1.07903	0.00505134	0.226712	Promoter (<=1kb)	114398404	114398803	6	114398086	114479866	81781	1	15465	ENSMUST00000160212.1	318	ENSMUSG00000053004	histamine receptor H1
Rgs9	3.60852	-2.20013	0.00510803	0.228255	Distal Intergenic	109208126	109208525	11	109239511	109246965	7455	2	19739	ENSMUST00000156785.1	38440	ENSMUSG00000020599	regulator of G-protein signaling 9
Spsb4	2.51644	2.31536	0.00513908	0.228644	Downstream (<1kb)	96943055	96943454	9	96943972	96971975	28004	2	211949	ENSMUST00000159298.1	28521	ENSMUSG00000046997	splA/ryanodine receptor domain and SOCS box containing 4
Olfr94	5.93188	-0.853444	0.00517602	0.229291	Promoter (<=1kb)	37197207	37197606	17	37196707	37198011	1305	2	258219	ENSMUST00000208047.1	405	ENSMUSG00000043827	olfactory receptor 94
Ankrd33b	4.78987	-0.966886	0.00520902	0.229758	Exon (ENSMUST00000123325.8/67434, exon 4 of 4)	31297320	31297719	15	31297567	31308194	10628	2	67434	ENSMUST00000227867.1	10475	ENSMUSG00000022237	ankyrin repeat domain 33B
Irx3	6.97422	0.656685	0.00527005	0.231226	Distal Intergenic	91993955	91994354	8	91798525	91802067	3543	2	16373	ENSMUST00000175795.3	-191888	ENSMUSG00000031734	Iroquois related homeobox 3
Irak3	5.41689	-0.860089	0.00532071	0.231226	Promoter (<=1kb)	120201108	120201507	10	120142163	120201498	59336	2	73914	ENSMUST00000135106.1	0	ENSMUSG00000020227	interleukin-1 receptor-associated kinase 3
Nap1l2	2.21743	3.22315	0.00532273	0.231226	Distal Intergenic	103114555	103114954	20	103184176	103186640	2465	2	17954	ENSMUST00000121720.1	71686	ENSMUSG00000082229	nucleosome assembly protein 1-like 2
Wscd2	2.54893	-3.52169	0.00533269	0.231226	Distal Intergenic	113462540	113462939	5	113490447	113589725	99279	1	320916	ENSMUST00000094452.3	-27508	ENSMUSG00000063430	WSC domain containing 2
Kif26b	6.31184	-0.817622	0.00542074	0.231961	Promoter (<=1kb)	178529641	178530040	1	178529125	178939200	410076	1	269152	ENSMUST00000161017.7	516	ENSMUSG00000026494	kinesin family member 26B
Trpc5os	1.02838	4.1214	0.00544835	0.231961	Intron (ENSMUST00000040184.3/22067, intron 2 of 10)	144495014	144495413	20	144470681	144477063	6383	1	100503240	ENSMUST00000178233.1	24333	ENSMUSG00000072934	transient receptor potential cation channel, subfamily C, member 5, opposite strand
Ripply3	6.40689	-0.696404	0.00545194	0.231961	Promoter (<=1kb)	94327888	94328287	16	94328420	94336935	8516	1	170765	ENSMUST00000023660.8	-133	ENSMUSG00000022941	ripply transcriptional repressor 3
Ntm	4.36817	-1.37407	0.00547637	0.231961	Intron (ENSMUST00000075069.10/235106, intron 2 of 7)	29239703	29240102	9	29009228	29185665	176438	2	235106	ENSMUST00000126044.7	-54038	ENSMUSG00000059974	neurotrimin
Mir7234	4.89001	-1.04281	0.00548453	0.231961	Distal Intergenic	73915542	73915941	7	73819590	73819641	52	1	102465712	ENSMUST00000199151.1	95952	ENSMUSG00000105381	microRNA 7234
Tapbp	1.88646	-5.42287	0.00548565	0.231961	Promoter (<=1kb)	33919418	33919817	17	33919512	33920375	864	1	21356	ENSMUST00000172888.1	0	ENSMUSG00000024308	TAP binding protein
Dusp5	3.73794	-1.5202	0.0055458	0.23354	Promoter (<=1kb)	53529998	53530397	19	53529109	53542431	13323	1	240672	ENSMUST00000038287.6	889	ENSMUSG00000034765	dual specificity phosphatase 5
Rps24	3.72857	-2.30106	0.00558326	0.234154	Intron (ENSMUST00000212108.1/ENSMUST00000212108.1, intron 1 of 4)	24612837	24613236	14	24491149	24491989	841	1	20088	ENSMUST00000224699.1	121688	ENSMUSG00000025290	ribosomal protein S24
Svep1	4.7151	-0.934547	0.0056333	0.234608	Promoter (<=1kb)	58205897	58206296	4	58042442	58206596	164155	2	64817	ENSMUST00000042850.8	300	ENSMUSG00000028369	sushi, von Willebrand factor type A, EGF and pentraxin domain containing 1
Slc16a3	4.06269	-1.23859	0.00567274	0.234608	Promoter (<=1kb)	120949366	120949765	11	120949081	120960868	11788	1	80879	ENSMUST00000168579.7	285	ENSMUSG00000025161	solute carrier family 16 (monocarboxylic acid transporters), member 3
Glra4	3.22009	2.21044	0.0056992	0.234608	Promoter (<=1kb)	136780569	136780968	20	136767005	136780141	13137	2	14657	ENSMUST00000154833.1	-428	ENSMUSG00000018595	glycine receptor, alpha 4 subunit
Dmrtc1a	1.75265	3.47894	0.00570061	0.234608	Distal Intergenic	102888098	102888497	20	102903222	102906469	3248	2	70887	ENSMUST00000120808.7	17972	ENSMUSG00000031323	DMRT-like family C1a
Platr26	2.93274	-3.02805	0.00570873	0.234608	Distal Intergenic	71690318	71690717	2	71719417	71730966	11550	1	381371	ENSMUST00000079720.5	-28700	ENSMUSG00000064263	pluripotency associated transcript 26
Wif1	5.48183	-0.918626	0.00576771	0.235555	Promoter (<=1kb)	121033955	121034354	10	121033960	121100650	66691	1	24117	ENSMUST00000020439.10	0	ENSMUSG00000020218	Wnt inhibitory factor 1
Hmga2	5.22281	-1.03766	0.00579561	0.235555	Promoter (<=1kb)	120476981	120477380	10	120361275	120476469	115195	2	15364	ENSMUST00000159699.1	-512	ENSMUSG00000056758	high mobility group AT-hook 2
Neurl1b	5.661	-0.852415	0.00580084	0.235555	Exon (ENSMUST00000182897.7/240055, exon 2 of 4)	26438492	26438891	17	26414965	26446349	31385	1	240055	ENSMUST00000053020.7	23527	ENSMUSG00000034413	neuralized E3 ubiquitin protein ligase 1B
Lif	6.23851	-0.843857	0.00591994	0.238912	Promoter (<=1kb)	4266731	4267130	11	4266796	4268249	1454	1	16878	ENSMUST00000154927.1	0	ENSMUSG00000034394	leukemia inhibitory factor
Hjv	5.06884	-0.944421	0.0059302	0.238912	Promoter (1-2kb)	96527046	96527445	3	96525172	96529210	4039	1	69585	ENSMUST00000049208.10	1874	ENSMUSG00000038403	hemojuvelin BMP co-receptor
Scmh1	2.62959	1.99236	0.00610407	0.244297	Distal Intergenic	120386297	120386696	4	120405281	120454515	49235	1	29871	ENSMUST00000134375.7	-18585	ENSMUSG00000000085	sex comb on midleg homolog 1
Celsr3	3.80022	1.04695	0.00611159	0.244297	Promoter (<=1kb)	108831762	108832161	9	108831740	108832820	1081	1	107934	ENSMUST00000192235.1	22	ENSMUSG00000023473	cadherin, EGF LAG seven-pass G-type receptor 3
4933400A11Rik	3.63906	2.59485	0.00628677	0.248389	Intron (ENSMUST00000112107.7/17318, intron 1 of 9)	169757498	169757897	20	169776425	169779557	3133	2	66747	ENSMUST00000112102.1	21660	ENSMUSG00000055357	capping protein (actin filament) muscle Z-line, alpha 1 pseudogene
Bbs9	2.75873	-2.85723	0.00631363	0.248389	Intron (ENSMUST00000039798.15/319845, intron 20 of 21)	22824597	22824996	9	22678750	22888274	209525	1	319845	ENSMUST00000124076.1	145847	ENSMUSG00000035919	Bardet-Biedl syndrome 9 (human)
Rgmb	2.9184	-2.50219	0.00633341	0.248389	Promoter (<=1kb)	15830651	15831050	17	15820848	15830651	9804	2	68799	ENSMUST00000231281.1	0	ENSMUSG00000048027	repulsive guidance molecule family member B
Dchs2	3.48584	1.28287	0.00634385	0.248389	Distal Intergenic	83100656	83101055	3	83127948	83357209	229262	1	100534287	ENSMUST00000191829.1	-26893	ENSMUSG00000102692	dachsous cadherin related 2
Adamts17	3.25612	1.3601	0.00634999	0.248389	Promoter (<=1kb)	66840519	66840918	7	66839813	67153171	313359	1	233332	ENSMUST00000107478.8	706	ENSMUSG00000058145	a disintegrin-like and metallopeptidase (reprolysin type) with thrombospondin type 1 motif, 17
Slc27a2	5.92945	-0.758614	0.00635961	0.248389	Promoter (<=1kb)	126553228	126553627	2	126553590	126564685	11096	1	26458	ENSMUST00000126249.1	0	ENSMUSG00000027359	solute carrier family 27 (fatty acid transporter), member 2
Gdf10	6.65108	-0.627138	0.00641863	0.248783	Promoter (<=1kb)	33923593	33923992	14	33923587	33937983	14397	1	14560	ENSMUST00000168727.2	6	ENSMUSG00000021943	growth differentiation factor 10
Rpl34	3.42803	-2.01451	0.00649463	0.248783	Intron (ENSMUST00000196438.2/ENSMUST00000196438.2, intron 1 of 2)	130913888	130914287	3	130726839	130730398	3560	2	68436	ENSMUST00000079085.10	-183490	ENSMUSG00000062006	ribosomal protein L34
Bub3	1.84624	-5.38249	0.00655042	0.248783	Intron (ENSMUST00000124096.7/14183, intron 2 of 6)	131681879	131682278	7	131560710	131571164	10455	1	12237	ENSMUST00000207442.1	121169	ENSMUSG00000066979	BUB3 mitotic checkpoint protein
Hes5	2.65257	1.96645	0.00657104	0.248783	Promoter (3-4kb)	154957053	154957452	4	154960923	154962371	1449	1	15208	ENSMUST00000049621.6	-3471	ENSMUSG00000048001	hes family bHLH transcription factor 5
Kcnk6	6.6477	-0.614928	0.00659489	0.248783	Promoter (<=1kb)	29231969	29232368	7	29221926	29232515	10590	2	52150	ENSMUST00000085818.5	147	ENSMUSG00000046410	potassium inwardly-rectifying channel, subfamily K, member 6
Mmp28	7.02849	-0.596882	0.00659908	0.248783	Promoter (<=1kb)	83462440	83462839	11	83441876	83462961	21086	2	118453	ENSMUST00000021020.12	122	ENSMUSG00000020682	matrix metallopeptidase 28 (epilysin)
Sh3rf3	4.4348	0.853795	0.00664155	0.248783	Promoter (<=1kb)	58813828	58814227	10	58814059	59007193	193135	1	237353	ENSMUST00000133151.1	0	ENSMUSG00000037990	SH3 domain containing ring finger 3
Bnc2	5.82905	-1.03448	0.00664562	0.248783	Promoter (<=1kb)	84546449	84546848	4	84390959	84546619	155661	2	242509	ENSMUST00000177256.7	0	ENSMUSG00000028487	basonuclin 2
Foxp1	3.1628	-2.28096	0.0066526	0.248783	Intron (ENSMUST00000113326.8/108655, intron 2 of 17)	99205914	99206313	6	99075962	99248336	172375	2	108655	ENSMUST00000177208.1	42023	ENSMUSG00000030067	forkhead box P1
Tcf20	4.61452	0.912392	0.0066864	0.248783	Promoter (<=1kb)	82962432	82962831	15	82856793	82963558	106766	2	21411	ENSMUST00000229547.1	727	ENSMUSG00000041852	transcription factor 20
Csrnp1	4.01414	-1.2775	0.00671581	0.248783	Promoter (<=1kb)	119982826	119983225	9	119972081	119983023	10943	2	215418	ENSMUST00000214058.1	0	ENSMUSG00000032515	cysteine-serine-rich nuclear protein 1
Tmsb4x	2.43456	3.18712	0.00674273	0.248783	Distal Intergenic	167179765	167180164	20	167207292	167208827	1536	2	19241	ENSMUST00000112175.1	28663	ENSMUSG00000049775	thymosin, beta 4, X chromosome
Mertk	4.57747	-1.2769	0.00674863	0.248783	Promoter (<=1kb)	128699093	128699492	2	128698956	128802894	103939	1	17289	ENSMUST00000014505.4	137	ENSMUSG00000014361	MER proto-oncogene tyrosine kinase
Hcrtr1	7.26628	-0.571408	0.00678298	0.248783	Promoter (<=1kb)	130139182	130139581	4	130130217	130139359	9143	2	230777	ENSMUST00000119423.7	0	ENSMUSG00000028778	hypocretin (orexin) receptor 1
H2-Q2	7.15914	-0.63314	0.00680629	0.248783	Promoter (<=1kb)	35342599	35342998	17	35342242	35345794	3553	1	15013	ENSMUST00000074806.11	357	ENSMUSG00000091705	histocompatibility 2, Q region locus 2
Gad2	7.0939	0.530225	0.00680909	0.248783	Promoter (<=1kb)	22622327	22622726	2	22622205	22693874	71670	1	14417	ENSMUST00000028123.3	122	ENSMUSG00000026787	glutamic acid decarboxylase 2
Atp6v1fnb	3.18765	-2.00475	0.00681239	0.248783	Promoter (2-3kb)	29474196	29474595	6	29471437	29473465	2029	1	668210	ENSMUST00000171317.1	2759	ENSMUSG00000090685	Atp6v1f neighbor
N4bp3	4.32796	-1.1581	0.00681276	0.248783	Promoter (<=1kb)	51650477	51650876	11	51643063	51650842	7780	2	212706	ENSMUST00000001080.15	0	ENSMUSG00000001053	NEDD4 binding protein 3
Armcx1	3.48543	1.70869	0.00683163	0.248783	Distal Intergenic	134733584	134733983	20	134719257	134720515	1259	1	78248	ENSMUST00000137173.1	14327	ENSMUSG00000033460	armadillo repeat containing, X-linked 1
Sorcs1	3.58669	-1.67718	0.00688629	0.24958	Distal Intergenic	49914682	49915081	19	50150967	50252678	101712	2	58178	ENSMUST00000168357.8	337597	ENSMUSG00000043531	sortilin-related VPS10 domain containing receptor 1
Sox6	6.23938	0.631743	0.006924	0.24958	Promoter (1-2kb)	116037152	116037551	7	115471344	116038744	567401	2	20679	ENSMUST00000166877.7	1193	ENSMUSG00000051910	SRY (sex determining region Y)-box 6
Mrps28	2.7134	1.90954	0.00693792	0.24958	Intron (ENSMUST00000042148.5/66230, intron 2 of 2)	8865895	8866294	3	8802146	8923918	121773	2	66230	ENSMUST00000042148.5	57624	ENSMUSG00000040269	mitochondrial ribosomal protein S28
Rnf138rt1	1.95168	3.26358	0.00695108	0.24958	Distal Intergenic	163723828	163724227	20	163760139	163761329	1191	2	74264	ENSMUST00000059320.3	37102	ENSMUSG00000083695	ring finger protein 138, retrogene 1
Actb	2.63704	-2.77038	0.00697668	0.249624	Distal Intergenic	142929070	142929469	5	142903115	142906754	3640	2	11461	ENSMUST00000100497.10	-22316	ENSMUSG00000029580	actin, beta
Pgrmc2	3.03547	-2.59235	0.00706942	0.252061	Exon (ENSMUST00000197066.1/ENSMUST00000197066.1, exon 2 of 2)	41286797	41287196	3	41066326	41083046	16721	2	70804	ENSMUST00000058578.7	-203751	ENSMUSG00000049940	progesterone receptor membrane component 2
4833415N18Rik	2.12331	-5.65246	0.00710901	0.252592	Intron (ENSMUST00000180792.7/74478, intron 18 of 20)	11713551	11713950	16	11778429	11781500	3072	1	73761	ENSMUST00000229695.1	-64479	NA	RIKEN cDNA 4833415N18 gene
Ammecr1	2.98151	2.2445	0.00717118	0.253919	Promoter (<=1kb)	142965691	142966090	20	142851146	142966728	115583	2	56068	ENSMUST00000041317.2	638	ENSMUSG00000042225	Alport syndrome, mental retardation, midface hypoplasia and elliptocytosis chromosomal region gene 1
Spsb4	3.35622	1.30866	0.00724463	0.254789	Promoter (<=1kb)	97018404	97018803	9	96994049	97018764	24716	2	211949	ENSMUST00000064445.1	0	ENSMUSG00000046997	splA/ryanodine receptor domain and SOCS box containing 4
4930519F16Rik	3.09154	2.38616	0.00724555	0.254789	Intron (ENSMUST00000033688.11/75106, intron 2 of 5)	103236850	103237249	20	103230094	103253047	22954	2	75106	ENSMUST00000182224.7	15798	ENSMUSG00000031325	RIKEN cDNA 4930519F16 gene
1700122O11Rik	4.50292	-1.04352	0.00727432	0.254925	Distal Intergenic	48031223	48031622	17	48036745	48038293	1549	2	76651	ENSMUST00000178823.1	6671	ENSMUSG00000094928	RIKEN cDNA 1700122O11 gene
Bclaf3	2.86008	2.64998	0.00731581	0.255231	Promoter (<=1kb)	159565659	159566058	20	159566849	159592202	25354	1	382252	ENSMUST00000149054.7	-791	ENSMUSG00000044150	Bclaf1 and Thrap3 family member 3
Zfp608	3.17971	1.58958	0.00733293	0.255231	Distal Intergenic	54827996	54828395	18	54892481	54895562	3082	2	269023	ENSMUST00000237009.1	67167	ENSMUSG00000052713	zinc finger protein 608
Garnl3	4.18947	0.998185	0.00738197	0.256067	Promoter (<=1kb)	33130906	33131305	2	32986374	33131436	145063	2	99326	ENSMUST00000137381.7	131	ENSMUSG00000038860	GTPase activating RANGAP domain-like 3
Cd83	6.51509	-0.64927	0.00741061	0.256192	Promoter (<=1kb)	43785172	43785571	13	43785185	43803128	17944	1	12522	ENSMUST00000221359.1	0	ENSMUSG00000015396	CD83 antigen
Mir3081	3.45363	-1.74211	0.00745011	0.25669	Intron (ENSMUST00000114634.2/117606, intron 1 of 18)	44530845	44531244	16	44558046	44558129	84	2	100526478	ENSMUST00000175305.1	26885	ENSMUSG00000093046	microRNA 3081
Dmrtc1c2	1.73741	3.45998	0.00748464	0.256751	Distal Intergenic	102812751	102813150	20	102804223	102805916	1694	1	668357	ENSMUST00000131451.1	8528	ENSMUSG00000067561	DMRT-like family C1c2
Pde4b	6.15298	-0.748822	0.00751924	0.256751	Promoter (<=1kb)	102088009	102088408	4	102087741	102557597	469857	1	18578	ENSMUST00000173119.7	268	ENSMUSG00000028525	phosphodiesterase 4B, cAMP specific
Asb9	1.70987	3.42826	0.00752714	0.256751	Distal Intergenic	164589337	164589736	20	164506327	164539752	33426	1	69299	ENSMUST00000033756.2	83010	ENSMUSG00000031384	ankyrin repeat and SOCS box-containing 9
Nr6a1	4.69774	-0.983013	0.00756853	0.257305	Promoter (<=1kb)	38925477	38925876	2	38723374	38926217	202844	2	14536	ENSMUST00000076275.10	341	ENSMUSG00000063972	nuclear receptor subfamily 6, group A, member 1
Pld1	4.2355	-1.33685	0.00767506	0.260062	Promoter (<=1kb)	27938832	27939231	3	27938695	28133239	194545	1	18805	ENSMUST00000120834.7	137	ENSMUSG00000027695	phospholipase D1
Phka2	2.99362	2.67088	0.00773891	0.26136	Exon (ENSMUST00000112377.7/110094, exon 31 of 34)	160586506	160586905	20	160557787	160562749	4963	1	110094	ENSMUST00000153907.1	28719	ENSMUSG00000031295	phosphorylase kinase alpha 2
Mospd2	0.86555	3.94458	0.00781254	0.262979	Exon (ENSMUST00000118058.1/ENSMUST00000118058.1, exon 1 of 1)	164863629	164864028	20	164936318	164980297	43980	2	76763	ENSMUST00000112247.8	116269	ENSMUSG00000061778	motile sperm domain containing 2
Creb5	6.42148	-0.654898	0.00795924	0.265171	Promoter (<=1kb)	53286664	53287063	6	53287270	53391409	104140	1	231991	ENSMUST00000205222.2	-207	ENSMUSG00000053007	cAMP responsive element binding protein 5
Otx2	3.72974	-1.36775	0.00798074	0.265171	Intron (ENSMUST00000228153.1/606497, intron 2 of 4)	48751608	48752007	14	48657851	48673819	15969	2	18424	ENSMUST00000227404.1	-77789	ENSMUSG00000021848	orthodenticle homeobox 2
Prokr2	4.44679	-1.0318	0.00798087	0.265171	Promoter (<=1kb)	132384768	132385167	2	132370329	132385400	15072	2	246313	ENSMUST00000049997.13	233	ENSMUSG00000050558	prokineticin receptor 2
Eno4	4.16927	-1.04705	0.00801312	0.265171	Intron (ENSMUST00000163821.2/71653, intron 14 of 14)	58981447	58981846	19	58955456	58970933	15478	1	226265	ENSMUST00000201123.1	25991	ENSMUSG00000048029	enolase 4
Phka2	2.58539	2.87303	0.00802045	0.265171	Intron (ENSMUST00000112408.8/237175, intron 10 of 27)	160470969	160471368	20	160502166	160591141	88976	1	110094	ENSMUST00000112377.7	-30798	ENSMUSG00000031295	phosphorylase kinase alpha 2
Kiz	5.50346	1.07199	0.00805745	0.265171	Promoter (2-3kb)	146950362	146950761	2	146952883	146970092	17210	1	228730	ENSMUST00000135595.1	-2122	ENSMUSG00000074749	kizuna centrosomal protein
Tmem28	2.97309	2.35357	0.00807502	0.265171	Exon (ENSMUST00000096363.2/620592, exon 3 of 3)	99847563	99847962	20	99821021	99848790	27770	1	620592	ENSMUST00000096363.2	26542	ENSMUSG00000071719	transmembrane protein 28
Grpr	0.874018	3.95381	0.00812445	0.265171	Distal Intergenic	163640548	163640947	20	163513904	163549677	35774	2	14829	ENSMUST00000033730.2	-90871	ENSMUSG00000031364	gastrin releasing peptide receptor
Scml2	0.486049	5.28882	0.00819051	0.265171	Intron (ENSMUST00000238603.1/107815, intron 5 of 11)	161145688	161146087	20	161162750	161256952	94203	1	107815	ENSMUST00000074802.11	-16663	ENSMUSG00000000037	Scm polycomb group protein like 2
Prtg	3.18151	-1.99204	0.00820858	0.265171	Intron (ENSMUST00000055535.8/235472, intron 8 of 19)	72852276	72852675	9	72806874	72917291	110418	1	235472	ENSMUST00000055535.8	45402	ENSMUSG00000036030	protogenin
1700122O11Rik	4.57244	-0.952365	0.00822861	0.265171	Promoter (1-2kb)	48039489	48039888	17	48036745	48038293	1549	2	76651	ENSMUST00000178823.1	-1196	ENSMUSG00000094928	RIKEN cDNA 1700122O11 gene
Cbfa2t3	6.93865	0.525098	0.00823102	0.265171	Promoter (<=1kb)	122676981	122677380	8	122629463	122678072	48610	2	12398	ENSMUST00000006525.13	692	ENSMUSG00000006362	CBFA2/RUNX1 translocation partner 3
Mid1	3.50989	2.40039	0.00824435	0.265171	Distal Intergenic	169543515	169543914	20	169685199	169990795	305597	1	17318	ENSMUST00000112107.7	-141285	ENSMUSG00000035299	midline 1
Cabp1	7.08912	0.506227	0.00826338	0.265171	Promoter (<=1kb)	115193149	115193548	5	115168689	115194381	25693	2	29867	ENSMUST00000112113.7	833	ENSMUSG00000029544	calcium binding protein 1
Zfp608	3.17292	1.41655	0.00829165	0.265171	Distal Intergenic	55137391	55137790	18	54888723	54992555	103833	2	269023	ENSMUST00000237844.1	-144836	ENSMUSG00000052713	zinc finger protein 608
1700029N11Rik	3.47687	-1.5692	0.00836833	0.265171	Intron (ENSMUST00000222236.1/ENSMUST00000222236.1, intron 1 of 3)	44493916	44494315	13	44439736	44469030	29295	1	69491	ENSMUST00000220639.1	54180	ENSMUSG00000098144	RIKEN cDNA 1700029N11 gene
Usp10	6.80843	-0.620396	0.00840659	0.265171	Distal Intergenic	119897951	119898350	8	119910360	119957555	47196	1	22224	ENSMUST00000144458.7	-12010	ENSMUSG00000031826	ubiquitin specific peptidase 10
Sh3kbp1	0.314527	5.12414	0.00842047	0.265171	Promoter (3-4kb)	159693342	159693741	20	159697316	159865400	168085	1	58194	ENSMUST00000123433.7	-3575	ENSMUSG00000040990	SH3-domain kinase binding protein 1
4931429P17Rik	1.6767	-5.21714	0.00845356	0.265171	Intron (ENSMUST00000223995.1/ENSMUST00000223995.1, intron 2 of 4)	48035398	48035797	13	47960330	48018608	58279	2	70971	ENSMUST00000061899.5	-16790	ENSMUSG00000047324	RIKEN cDNA 4931429P17 gene
9430021M05Rik	2.5542	-3.52463	0.00846467	0.265171	Distal Intergenic	162693332	162693731	2	162661163	162667109	5947	1	77288	ENSMUST00000145985.1	32169	NA	RIKEN cDNA 9430021M05 gene
Evi5l	4.40185	0.886403	0.00847461	0.265171	Promoter (<=1kb)	4206019	4206418	8	4206249	4211257	5009	1	213027	ENSMUST00000176645.1	0	ENSMUSG00000011832	ecotropic viral integration site 5 like
Rai2	3.16637	1.96968	0.00849647	0.265171	Distal Intergenic	161571934	161572333	20	161717069	161779494	62426	1	24004	ENSMUST00000112338.1	-144736	ENSMUSG00000043518	retinoic acid induced 2
9130227L01Rik	5.16985	-0.930189	0.00849907	0.265171	Distal Intergenic	55889437	55889836	1	55931241	55972098	40858	1	329159	ENSMUST00000189293.1	-41405	ENSMUSG00000099950	RIKEN cDNA 9130227L01 gene
Pik3r1	3.83475	-1.65756	0.00849958	0.265171	Intron (ENSMUST00000055518.12/18708, intron 1 of 15)	101762758	101763157	13	101755571	101768213	12643	2	18708	ENSMUST00000189426.1	5056	ENSMUSG00000041417	phosphoinositide-3-kinase regulatory subunit 1
Zfp423	5.86797	-0.84275	0.00854749	0.265376	Promoter (2-3kb)	87961681	87962080	8	87661810	87959595	297786	2	94187	ENSMUST00000109655.8	-2086	ENSMUSG00000045333	zinc finger protein 423
Adora2a	6.01621	-0.69444	0.0085703	0.265376	Promoter (<=1kb)	75317318	75317717	10	75317102	75326280	9179	1	11540	ENSMUST00000219044.1	216	ENSMUSG00000020178	adenosine A2a receptor
Fermt1	6.97747	-0.526907	0.00858395	0.265376	Promoter (<=1kb)	132945401	132945800	2	132904389	132945629	41241	2	241639	ENSMUST00000134937.1	0	ENSMUSG00000027356	fermitin family member 1
Pls1	2.58244	1.95554	0.00868927	0.266597	Promoter (1-2kb)	95816751	95817150	9	95784181	95815406	31226	2	102502	ENSMUST00000119760.1	-1345	ENSMUSG00000049493	plastin 1 (I-isoform)
Mmp2	2.8967	-2.47787	0.00869445	0.266597	Distal Intergenic	92774649	92775048	8	92827291	92853420	26130	1	17390	ENSMUST00000034187.8	-52243	ENSMUSG00000031740	matrix metallopeptidase 2
4933430N04Rik	2.89712	-2.43703	0.00870159	0.266597	Distal Intergenic	8994175	8994574	8	9125412	9132288	6877	2	71249	ENSMUST00000208031.1	137714	ENSMUSG00000108848	RIKEN cDNA 4933430N04 gene
Iftap	3.66569	1.29953	0.00875253	0.267357	Distal Intergenic	101174998	101175397	2	101562125	101576125	14001	2	68170	ENSMUST00000177152.1	400728	ENSMUSG00000027165	intraflagellar transport associated protein
4933417O13Rik	5.878	-0.940428	0.00878671	0.267602	Intron (ENSMUST00000009689.10/16535, intron 15 of 15)	143365456	143365855	7	143322775	143330650	7876	2	71153	ENSMUST00000188294.1	-34806	ENSMUSG00000101360	RIKEN cDNA 4933417O13 gene
9130015G15Rik	3.08746	-1.89557	0.00882867	0.268082	Promoter (2-3kb)	49162611	49163010	7	49122334	49159819	37486	2	108167511	ENSMUST00000208621.1	-2792	NA	RIKEN cDNA 9130015G15 gene
Adcyap1r1	3.72725	1.05241	0.0088939	0.269264	Promoter (<=1kb)	55452453	55452852	6	55452177	55460245	8069	1	11517	ENSMUST00000167484.1	276	ENSMUSG00000029778	adenylate cyclase activating polypeptide 1 receptor 1
Rnf128	1.36017	3.61712	0.00893138	0.269461	Intron (ENSMUST00000046763.12/102871, intron 10 of 13)	139529643	139530042	20	139563316	139673138	109823	1	66889	ENSMUST00000113027.7	-33274	ENSMUSG00000031438	ring finger protein 128
Epha5	2.94131	1.84736	0.00895308	0.269461	Intron (ENSMUST00000053733.14/13839, intron 3 of 15)	84302298	84302697	5	84057791	84416806	359016	2	13839	ENSMUST00000113403.7	114109	ENSMUSG00000029245	Eph receptor A5
Frmpd3	2.46138	2.3978	0.00903943	0.271262	Intron (ENSMUST00000208130.1/245643, intron 11 of 14)	140403037	140403436	20	140381971	140394540	12570	1	245643	ENSMUST00000044702.6	21066	ENSMUSG00000042425	FERM and PDZ domain containing 3
Prdm6	4.03887	-1.20131	0.00936476	0.280203	Promoter (<=1kb)	53552214	53552613	18	53551594	53575857	24264	1	225518	ENSMUST00000115398.1	620	ENSMUSG00000069378	PR domain containing 6
Plce1	4.12212	0.858233	0.0094861	0.282556	Promoter (<=1kb)	38480965	38481364	19	38481121	38783430	302310	1	74055	ENSMUST00000182481.7	0	ENSMUSG00000024998	phospholipase C, epsilon 1
Cnn1	4.59153	-0.970674	0.00949859	0.282556	Promoter (<=1kb)	22099782	22100181	9	22100192	22105675	5484	1	12797	ENSMUST00000213607.1	-11	ENSMUSG00000001349	calponin 1
Chd5	3.36105	1.30495	0.0095519	0.282565	Intron (ENSMUST00000030775.11/269610, intron 2 of 41)	152349304	152349703	4	152341595	152353626	12032	1	269610	ENSMUST00000136134.1	7709	ENSMUSG00000005045	chromodomain helicase DNA binding protein 5
Mir672	1.61506	3.31324	0.00957132	0.282565	Intron (ENSMUST00000118314.7/245555, intron 1 of 2)	104130576	104130975	20	104116175	104116274	100	2	751535	ENSMUST00000102331.1	-14302	ENSMUSG00000076286	microRNA 672
Ier3ip1	3.72118	-1.65542	0.00958176	0.282565	Intron (ENSMUST00000166956.1/664805, intron 7 of 8)	76893514	76893913	18	76930017	76941612	11596	1	66191	ENSMUST00000026487.5	-36104	ENSMUSG00000090000	immediate early response 3 interacting protein 1
Hhipl1	3.9058	-1.28325	0.0096542	0.283883	Promoter (<=1kb)	108306283	108306682	12	108306548	108326608	20061	1	214305	ENSMUST00000223395.1	0	ENSMUSG00000021260	hedgehog interacting protein-like 1
Mapkap1	3.04277	-2.21923	0.00972078	0.284151	Distal Intergenic	34646086	34646485	2	34619582	34623919	4338	1	227743	ENSMUST00000129633.1	26504	ENSMUSG00000038696	mitogen-activated protein kinase associated protein 1
Smyd3	4.10939	-1.42528	0.00981606	0.284151	Exon (ENSMUST00000128302.7/69726, exon 10 of 12)	179043874	179044273	1	178957250	178989345	32096	2	69726	ENSMUST00000129393.1	-54529	ENSMUSG00000055067	SET and MYND domain containing 3
Pantr2	3.21564	1.54226	0.00982739	0.284151	Intron (ENSMUST00000199521.4/ENSMUST00000199521.4, intron 1 of 1)	42706266	42706665	1	42707061	42713454	6394	2	66620	ENSMUST00000180589.1	6789	ENSMUSG00000097063	POU domain, class 3, transcription factor 3 adjacent noncoding transcript 2
Adgrb2	5.73474	0.709882	0.00983543	0.284151	Promoter (<=1kb)	129986182	129986581	4	129985268	130022633	37366	1	230775	ENSMUST00000121049.7	914	ENSMUSG00000028782	adhesion G protein-coupled receptor B2
Mllt3	3.60063	-1.52822	0.00983803	0.284151	Distal Intergenic	87729325	87729724	4	87773953	87806294	32342	2	70122	ENSMUST00000148059.1	76570	ENSMUSG00000028496	myeloid/lymphoid or mixed-lineage leukemia; translocated to, 3
Gm4710	1.59599	-5.13864	0.00985767	0.284151	Distal Intergenic	76851338	76851737	17	75861023	75889039	28017	1	100043885	ENSMUST00000234389.1	990315	ENSMUSG00000117539	predicted gene 4710
Gm6249	1.59599	-5.13864	0.00985767	0.284151	Distal Intergenic	136554368	136554767	7	136667955	136710604	42650	2	621677	ENSMUST00000211142.1	155837	ENSMUSG00000110101	predicted gene 6249
Amelx	2.80864	2.57544	0.0100737	0.288328	Intron (ENSMUST00000033721.12/11856, intron 1 of 12)	169213757	169214156	20	169180022	169187200	7179	2	11704	ENSMUST00000154923.1	-26557	ENSMUSG00000031354	amelogenin, X-linked
Gm5089	8.11899	-0.559687	0.0100773	0.288328	Promoter (<=1kb)	122406565	122406964	14	122365239	122406743	41505	2	328479	ENSMUST00000228409.1	0	ENSMUSG00000064052	predicted gene 5089
Slc22a7	4.05137	1.08769	0.0100871	0.288328	Exon (ENSMUST00000225808.1/106763, exon 13 of 13)	46455936	46456335	17	46432183	46438457	6275	2	108114	ENSMUST00000087012.6	-17479	ENSMUSG00000067144	solute carrier family 22 (organic anion transporter), member 7
Ttll8	4.02222	1.02276	0.010182	0.289992	Promoter (<=1kb)	88954468	88954867	15	88890633	88954418	63786	2	239591	ENSMUST00000177180.7	-50	ENSMUSG00000022388	tubulin tyrosine ligase-like family, member 8
Syk	5.8352	-0.788221	0.010202	0.289992	Promoter (<=1kb)	52582834	52583233	13	52583173	52648792	65620	1	20963	ENSMUST00000120135.7	0	ENSMUSG00000021457	spleen tyrosine kinase
Mir672	3.19243	2.38164	0.0103004	0.291646	Exon (ENSMUST00000118314.7/245555, exon 3 of 3)	104079843	104080242	20	104116175	104116274	100	2	751535	ENSMUST00000102331.1	36032	ENSMUSG00000076286	microRNA 672
Kank4	7.57616	-0.513924	0.0103172	0.291646	Promoter (<=1kb)	98817268	98817667	4	98754898	98817537	62640	2	242553	ENSMUST00000102790.3	0	ENSMUSG00000035407	KN motif and ankyrin repeat domains 4
C230014O12Rik	2.5832	-2.71292	0.0105018	0.294789	Distal Intergenic	34132111	34132510	2	34018289	34107729	89441	2	329387	ENSMUST00000134921.1	-24382	ENSMUSG00000087461	RIKEN cDNA C230014O12 gene
4933406C10Rik	3.28187	-2.11799	0.0105058	0.294789	Distal Intergenic	32897586	32897985	12	32924957	32953783	28827	2	74076	ENSMUST00000180391.1	55798	ENSMUSG00000097494	RIKEN cDNA 4933406C10 gene
Kdr	7.10023	-0.539894	0.0105153	0.294789	Promoter (<=1kb)	75977792	75978191	5	75932827	75978458	45632	2	16542	ENSMUST00000113516.1	267	ENSMUSG00000062960	kinase insert domain protein receptor
Sfrp2	4.62721	-0.979597	0.0105743	0.294789	Promoter (<=1kb)	83766536	83766935	3	83766565	83770143	3579	1	20319	ENSMUST00000140261.7	0	ENSMUSG00000027996	secreted frizzled-related protein 2
Mospd2	0.0388662	4.85669	0.0105966	0.294789	Promoter (1-2kb)	164977988	164978387	20	164936318	164980297	43980	2	76763	ENSMUST00000112247.8	1910	ENSMUSG00000061778	motile sperm domain containing 2
Fam43a	6.77799	-0.800542	0.0106075	0.294789	Promoter (<=1kb)	30600708	30601107	16	30599723	30602797	3075	1	224093	ENSMUST00000059078.3	985	ENSMUSG00000046546	family with sequence similarity 43, member A
1700121N20Rik	3.98307	1.06821	0.0106433	0.294789	Distal Intergenic	106480925	106481324	12	106442653	106447666	5014	2	76639	ENSMUST00000167922.1	-33259	ENSMUSG00000092066	RIKEN cDNA 1700121N20 gene
Bhlhb9	2.22755	2.91919	0.0106987	0.294789	Distal Intergenic	135907424	135907823	20	135885983	135887470	1488	1	70237	ENSMUST00000151989.1	21441	ENSMUSG00000072964	basic helix-loop-helix domain containing, class B9
Unc5c	3.7816	1.30145	0.0107011	0.294789	Intron (ENSMUST00000106236.8/22253, intron 1 of 15)	141586068	141586467	3	141465671	141830538	364868	1	22253	ENSMUST00000142762.1	120397	ENSMUSG00000059921	unc-5 netrin receptor C
Arhgap29	4.4973	-0.947388	0.0107165	0.294789	Promoter (<=1kb)	121953157	121953556	3	121953229	122016753	63525	1	214137	ENSMUST00000037958.13	0	ENSMUSG00000039831	Rho GTPase activating protein 29
Rap1gap2	6.68618	-0.528224	0.0107645	0.295317	Promoter (<=1kb)	74610650	74611049	11	74383485	74610915	227431	2	380711	ENSMUST00000238457.1	0	ENSMUSG00000038807	RAP1 GTPase activating protein 2
Nhs	3.16517	2.47478	0.0108072	0.295697	Intron (ENSMUST00000087085.9/195727, intron 1 of 8)	162000830	162001229	20	161836815	162159388	322574	2	195727	ENSMUST00000081569.6	158159	ENSMUSG00000059493	NHS actin remodeling regulator
Cdh22	5.31152	0.835319	0.0108607	0.296367	Promoter (<=1kb)	165233470	165233869	2	165111507	165234853	123347	2	104010	ENSMUST00000065438.12	984	ENSMUSG00000053166	cadherin 22
Sh3kbp1	2.24615	2.94324	0.0109301	0.296933	Intron (ENSMUST00000112456.8/58194, intron 4 of 17)	159813087	159813486	20	159840468	159975664	135197	1	58194	ENSMUST00000112451.7	-26982	ENSMUSG00000040990	SH3-domain kinase binding protein 1
Bcor	6.21579	1.65806	0.0109613	0.296933	Exon (ENSMUST00000209776.1/71458, exon 2 of 5)	12137320	12137719	20	12058981	12128400	69420	2	71458	ENSMUST00000145872.7	-8920	ENSMUSG00000040363	BCL6 interacting corepressor
Llgl2	6.07131	-0.854333	0.0109685	0.296933	Promoter (<=1kb)	115824270	115824669	11	115824058	115855778	31721	1	217325	ENSMUST00000177736.7	212	ENSMUSG00000020782	LLGL2 scribble cell polarity complex component
Inppl1	3.17236	-2.3593	0.011006	0.297163	Promoter (<=1kb)	101836561	101836960	7	101833515	101836603	3089	2	16332	ENSMUST00000211514.1	0	ENSMUSG00000032737	inositol polyphosphate phosphatase-like 1
Nepro	3.98725	-1.24566	0.0110503	0.297194	Distal Intergenic	44667362	44667761	16	44724301	44737284	12984	1	212547	ENSMUST00000048788.13	-56540	ENSMUSG00000036208	nucleolus and neural progenitor protein
Bves	3.95906	-1.22264	0.0110796	0.297194	Promoter (<=1kb)	45334783	45335182	10	45335772	45372479	36708	1	23828	ENSMUST00000095715.4	-590	ENSMUSG00000071317	blood vessel epicardial substance
Grpr	0.742455	3.80994	0.0111199	0.297194	Distal Intergenic	163604360	163604759	20	163513904	163549677	35774	2	14829	ENSMUST00000033730.2	-54683	ENSMUSG00000031364	gastrin releasing peptide receptor
Plcd1	5.89402	-0.94274	0.0111234	0.297194	Promoter (<=1kb)	119093373	119093772	9	119071527	119093502	21976	2	18799	ENSMUST00000010804.3	0	ENSMUSG00000010660	phospholipase C, delta 1
Scml2	2.478	2.72734	0.011349	0.302433	Intron (ENSMUST00000238603.1/107815, intron 4 of 11)	161131492	161131891	20	161124268	161256886	132619	1	107815	ENSMUST00000087090.9	7224	ENSMUSG00000000037	Scm polycomb group protein like 2
Tug1	4.55293	-1.03892	0.0114144	0.303386	Exon (ENSMUST00000121615.1/ENSMUST00000121615.1, exon 1 of 1)	3628931	3629330	11	3644999	3647132	2134	2	544752	ENSMUST00000227137.1	17802	ENSMUSG00000056579	taurine upregulated gene 1
Gpr176	6.36629	-0.610907	0.0114781	0.303406	Promoter (<=1kb)	118372878	118373277	2	118277110	118373419	96310	2	381413	ENSMUST00000039160.2	142	ENSMUSG00000040133	G protein-coupled receptor 176
Mir466f-4	2.5762	1.90043	0.0114791	0.303406	Promoter (1-2kb)	71105499	71105898	13	71107089	71107209	121	1	100316804	ENSMUST00000116930.1	-1191	ENSMUSG00000080580	microRNA 466f-4
Gm4750	3.91569	2.29817	0.0115041	0.303406	Distal Intergenic	152427024	152427423	20	152432477	152434676	2200	1	207318	ENSMUST00000152262.1	-5054	ENSMUSG00000087235	actin, beta pseudogene
Mab21l1	4.66295	0.835353	0.0116307	0.305955	Intron (ENSMUST00000029374.7/26422, intron 41 of 57)	55761294	55761693	3	55782510	55785001	2492	1	17116	ENSMUST00000075422.5	-20817	ENSMUSG00000056947	mab-21-like 1
Prom2	3.82663	-1.502	0.0117651	0.308078	Distal Intergenic	127559284	127559683	2	127526473	127541467	14995	2	192212	ENSMUST00000028855.13	-17817	ENSMUSG00000027376	prominin 2
Pdha1	0.0528042	4.87031	0.0117847	0.308078	Distal Intergenic	160207678	160208077	20	160122209	160138413	16205	2	18597	ENSMUST00000033662.8	-69265	ENSMUSG00000031299	pyruvate dehydrogenase E1 alpha 1
Ube2m	6.82631	-0.547352	0.0118182	0.308078	Exon (ENSMUST00000069289.14/109889, exon 7 of 7)	13043753	13044152	7	13035120	13038275	3156	2	22192	ENSMUST00000165394.8	-5478	ENSMUSG00000005575	ubiquitin-conjugating enzyme E2M
Bub3	2.70415	-2.23	0.0118318	0.308078	Intron (ENSMUST00000124096.7/14183, intron 2 of 6)	131579692	131580091	7	131560710	131571164	10455	1	12237	ENSMUST00000207442.1	18982	ENSMUSG00000066979	BUB3 mitotic checkpoint protein
Foxp1	3.24582	-2.43918	0.0119299	0.309843	Promoter (<=1kb)	99027727	99028126	6	99016550	99027991	11442	2	108655	ENSMUST00000175670.1	0	ENSMUSG00000030067	forkhead box P1
Eya2	5.78482	-0.915815	0.011991	0.310065	Promoter (<=1kb)	165595180	165595579	2	165595032	165771719	176688	1	14049	ENSMUST00000088132.12	148	ENSMUSG00000017897	EYA transcriptional coactivator and phosphatase 2
B3gnt7	5.97198	-0.73966	0.011999	0.310065	Promoter (<=1kb)	86303283	86303682	1	86303531	86305849	2319	1	227327	ENSMUST00000188695.1	0	ENSMUSG00000079445	UDP-GlcNAc:betaGal beta-1,3-N-acetylglucosaminyltransferase 7
Rai2	2.43255	2.17885	0.0120462	0.3105	Distal Intergenic	161586944	161587343	20	161717069	161779494	62426	1	24004	ENSMUST00000112338.1	-129726	ENSMUSG00000043518	retinoic acid induced 2
B230110G15Rik	1.77628	-5.31265	0.0121055	0.311246	Promoter (<=1kb)	138579686	138580085	6	138580624	138599314	18691	1	77982	ENSMUST00000190868.1	-539	ENSMUSG00000100166	RIKEN cDNA B230110G15 gene
Tomm7	3.82241	-1.20377	0.0121862	0.311719	Exon (ENSMUST00000122963.1/ENSMUST00000122963.1, exon 1 of 5)	23831137	23831536	5	23838944	23844161	5218	2	66169	ENSMUST00000030851.6	12625	ENSMUSG00000028998	translocase of outer mitochondrial membrane 7
Pax3	3.21199	-2.01572	0.0121917	0.311719	Distal Intergenic	78017506	78017905	1	78101267	78196838	95572	2	18505	ENSMUST00000004994.15	178933	ENSMUSG00000004872	paired box 3
4933432G23Rik	4.61181	-1.00351	0.0122325	0.311719	Distal Intergenic	118317109	118317508	9	118429836	118437048	7213	1	71196	ENSMUST00000213675.1	-112328	ENSMUSG00000111843	RIKEN cDNA 4933432G23 gene
Foxo6	7.84558	0.681648	0.0122458	0.311719	Exon (ENSMUST00000102656.3/329934, exon 2 of 2)	120267208	120267607	4	120267079	120287349	20271	2	329934	ENSMUST00000102656.3	19742	ENSMUSG00000052135	forkhead box O6
Kiz	2.37548	2.03402	0.0123794	0.314339	Intron (ENSMUST00000099278.8/228730, intron 6 of 13)	146920912	146921311	2	146952883	146970092	17210	1	228730	ENSMUST00000135595.1	-31572	ENSMUSG00000074749	kizuna centrosomal protein
3010001F23Rik	4.71531	2.29843	0.0125126	0.315542	Exon (ENSMUST00000137460.1/75693, exon 2 of 2)	152385996	152386395	20	152369842	152386200	16359	1	75693	ENSMUST00000137460.1	16154	ENSMUSG00000084885	RIKEN cDNA 3010001F23 gene
Bmp7	6.55383	-0.578723	0.0125977	0.315542	Distal Intergenic	172787619	172788018	2	172916118	172940092	23975	2	12162	ENSMUST00000137247.1	152074	ENSMUSG00000008999	bone morphogenetic protein 7
Nrxn2	6.41096	0.590929	0.0125977	0.315542	Promoter (<=1kb)	6428611	6429010	19	6428646	6464075	35430	1	18190	ENSMUST00000155158.2	0	ENSMUSG00000033768	neurexin II
Cntn2	5.22569	-0.893236	0.0126333	0.315542	Promoter (<=1kb)	132542174	132542573	1	132511792	132542865	31074	2	21367	ENSMUST00000190601.6	292	ENSMUSG00000053024	contactin 2
Scml2	2.65611	2.38949	0.0126471	0.315542	Intron (ENSMUST00000238603.1/107815, intron 4 of 11)	161136680	161137079	20	161124268	161256886	132619	1	107815	ENSMUST00000087090.9	12412	ENSMUSG00000000037	Scm polycomb group protein like 2
Tox2	6.78099	-0.540175	0.0126672	0.315542	Exon (ENSMUST00000017961.10/59091, exon 4 of 6)	163339009	163339408	2	163320378	163323102	2725	1	269389	ENSMUST00000148599.1	18631	ENSMUSG00000074607	TOX high mobility group box family member 2
Rai2	3.15305	2.21124	0.0127145	0.315542	Promoter (3-4kb)	161720647	161721046	20	161717627	161779496	61870	1	24004	ENSMUST00000061514.7	3020	ENSMUSG00000043518	retinoic acid induced 2
Eda	2.28779	2.32105	0.012724	0.315542	Promoter (<=1kb)	99975759	99976158	20	99975781	100395812	420032	1	13607	ENSMUST00000113777.7	0	ENSMUSG00000059327	ectodysplasin-A
Bcor	5.82864	2.37474	0.012827	0.315542	Promoter (2-3kb)	12077965	12078364	20	12036740	12080553	43814	2	71458	ENSMUST00000065143.13	2189	ENSMUSG00000040363	BCL6 interacting corepressor
Bcas1	3.90504	-1.30715	0.0128846	0.315542	Promoter (4-5kb)	170411031	170411430	2	170346991	170406509	59519	2	76960	ENSMUST00000154650.7	-4522	ENSMUSG00000013523	breast carcinoma amplified sequence 1
Ccdc172	2.93497	-2.02769	0.0128911	0.315542	Exon (ENSMUST00000235305.1/75645, exon 7 of 7)	58552503	58552902	19	58512022	58553028	41007	1	75645	ENSMUST00000069419.7	40481	ENSMUSG00000025090	coiled-coil domain containing 172
Chrdl1	1.95545	2.61723	0.0128916	0.315542	Intron (ENSMUST00000063029.12/83453, intron 3 of 10)	143328346	143328745	20	143285674	143390099	104426	2	83453	ENSMUST00000063029.12	61354	ENSMUSG00000031283	chordin-like 1
Cdh26	3.76968	-1.28012	0.0129012	0.315542	Distal Intergenic	178647897	178648296	2	178460630	178466572	5943	1	381409	ENSMUST00000176869.1	187267	ENSMUSG00000039155	cadherin-like 26
Chodl	3.19933	-1.73793	0.0129029	0.315542	Distal Intergenic	78843300	78843699	16	78930948	78947155	16208	1	246048	ENSMUST00000114216.1	-87249	ENSMUSG00000022860	chondrolectin
Rasl11b	3.51453	-2.0631	0.0129165	0.315542	Distal Intergenic	74164636	74165035	5	74195286	74199481	4196	1	68939	ENSMUST00000051937.8	-30251	ENSMUSG00000049907	RAS-like, family 11, member B
1700028P15Rik	5.90854	0.632155	0.0129202	0.315542	Distal Intergenic	171590993	171591392	2	171958188	171962131	3944	2	75655	ENSMUST00000151904.1	370739	ENSMUSG00000086823	RIKEN cDNA 1700028P15 gene
Ano1	3.15877	1.56677	0.0129919	0.316128	Promoter (<=1kb)	144738346	144738745	7	144588549	144738543	149995	2	101772	ENSMUST00000121758.7	0	ENSMUSG00000031075	anoctamin 1, calcium activated chloride channel
Sh3kbp1	2.55312	2.60636	0.0130059	0.316128	Intron (ENSMUST00000112456.8/58194, intron 9 of 17)	159903632	159904031	20	159919859	159973319	53461	1	58194	ENSMUST00000152426.1	-15828	ENSMUSG00000040990	SH3-domain kinase binding protein 1
Slc66a2	5.83171	-0.747809	0.0131007	0.317342	Exon (ENSMUST00000077962.7/240444, exon 4 of 4)	80295666	80296065	18	80262840	80263485	646	1	66943	ENSMUST00000155039.1	32826	ENSMUSG00000034006	solute carrier family 66 member 2
Glis3	4.10186	-1.2642	0.0131316	0.317342	Intron (ENSMUST00000162022.7/226075, intron 6 of 10)	28334596	28334995	19	28262347	28326006	63660	2	226075	ENSMUST00000159520.7	-8590	ENSMUSG00000052942	GLIS family zinc finger 3
Foxp4	3.01727	-2.14656	0.0132335	0.317342	Distal Intergenic	47930925	47931324	17	47867133	47924645	57513	2	74123	ENSMUST00000113265.7	-6280	ENSMUSG00000023991	forkhead box P4
Six3	5.87741	-0.659592	0.0132466	0.317342	Distal Intergenic	85486001	85486400	17	85613608	85625222	11615	1	20473	ENSMUST00000175898.3	-127208	ENSMUSG00000038805	sine oculis-related homeobox 3
Mpzl3	2.17962	-3.19411	0.0132746	0.317342	Promoter (<=1kb)	45059372	45059771	9	45059249	45065653	6405	1	319742	ENSMUST00000187113.1	123	ENSMUSG00000070305	myelin protein zero-like 3
Gxylt2	5.13394	-0.791681	0.0132844	0.317342	Promoter (<=1kb)	100704469	100704868	6	100704734	100810913	106180	1	232313	ENSMUST00000032157.8	0	ENSMUSG00000030074	glucoside xylosyltransferase 2
Kirrel3	4.58244	-0.831262	0.0133151	0.317342	Promoter (<=1kb)	34487800	34488199	9	34488733	35036716	547984	1	67703	ENSMUST00000187625.6	-534	ENSMUSG00000032036	kirre like nephrin family adhesion molecule 3
Lhfpl1	1.78769	3.05809	0.0133501	0.317342	Promoter (<=1kb)	145348957	145349356	20	145341009	145349089	8081	2	237091	ENSMUST00000123443.1	0	ENSMUSG00000041700	lipoma HMGIC fusion partner-like 1
Atg4a	5.91195	2.12348	0.0133698	0.317342	Intron (ENSMUST00000112971.1/666468, intron 9 of 12)	141150192	141150591	20	141162095	141163455	1361	1	666468	ENSMUST00000147972.1	-11504	ENSMUSG00000079418	autophagy related 4A, cysteine peptidase
Grm4	4.63794	0.849464	0.0133973	0.317342	Promoter (<=1kb)	27513475	27513874	17	27426556	27513714	87159	2	268934	ENSMUST00000231290.1	0	ENSMUSG00000063239	glutamate receptor, metabotropic 4
Mir384	0.703561	3.76702	0.0134004	0.317342	Distal Intergenic	105288584	105288983	20	105344282	105344369	88	2	723861	ENSMUST00000083565.1	55386	ENSMUSG00000065499	microRNA 384
Slc38a4	5.20799	-0.873287	0.0134281	0.317342	Promoter (<=1kb)	97054797	97055196	15	96994823	97055956	61134	2	69354	ENSMUST00000023101.9	760	ENSMUSG00000022464	solute carrier family 38, member 4
Slc45a4	1.34376	3.25464	0.0134885	0.317369	Distal Intergenic	73659280	73659679	15	73605593	73645762	40170	2	106068	ENSMUST00000130765.1	-13518	ENSMUSG00000079020	solute carrier family 45, member 4
Cacng2	4.59051	-1.06243	0.0134912	0.317369	Promoter (<=1kb)	78119830	78120229	15	77991748	78120028	128281	2	12300	ENSMUST00000019290.2	0	ENSMUSG00000019146	calcium channel, voltage-dependent, gamma subunit 2
Gsx2	7.38488	0.767285	0.0135506	0.317454	Promoter (<=1kb)	75075174	75075573	5	75075601	75077893	2293	1	14843	ENSMUST00000040477.3	-28	ENSMUSG00000035946	GS homeobox 2
Lrig1	3.60672	-1.37924	0.0135569	0.317454	Distal Intergenic	94771577	94771976	6	94604529	94700158	95630	2	16206	ENSMUST00000204645.2	-71419	ENSMUSG00000030029	leucine-rich repeats and immunoglobulin-like domains 1
Sfrp5	7.98396	-0.532443	0.0136845	0.31971	Promoter (<=1kb)	42201367	42201766	19	42197971	42202252	4282	2	54612	ENSMUST00000018966.7	486	ENSMUSG00000018822	secreted frizzled-related sequence protein 5
Gm6249	1.8874	2.46929	0.0137672	0.320446	Exon (ENSMUST00000211142.1/621677, exon 6 of 6)	136669900	136670299	7	136667955	136710604	42650	2	621677	ENSMUST00000211142.1	40305	ENSMUSG00000110101	predicted gene 6249
Lncppara	5.65096	0.685793	0.0137786	0.320446	Distal Intergenic	85634438	85634837	15	85653616	85707524	53909	1	102800312	ENSMUST00000230913.1	-18779	NA	long noncoding RNA near Ppara
Efnb2	2.49378	-2.62231	0.013814	0.320541	Distal Intergenic	7321930	7322329	8	8620597	8639363	18767	2	13642	ENSMUST00000152698.1	1317034	ENSMUSG00000001300	ephrin B2
Wwc1	2.38717	-3.4078	0.0138536	0.320733	Intron (ENSMUST00000018993.6/211652, intron 1 of 22)	35921653	35922052	11	35868745	35875712	6968	2	211652	ENSMUST00000127086.1	-45941	ENSMUSG00000018849	WW, C2 and coiled-coil domain containing 1
Piga	1.79242	3.06402	0.0139139	0.321262	Promoter (<=1kb)	164421754	164422153	20	164422584	164431972	9389	1	18700	ENSMUST00000133813.2	-431	ENSMUSG00000031381	phosphatidylinositol glycan anchor biosynthesis, class A
Scube2	6.14371	-0.625718	0.013954	0.321262	Promoter (<=1kb)	109865611	109866010	7	109798690	109865679	66990	2	56788	ENSMUST00000106729.7	0	ENSMUSG00000007279	signal peptide, CUB domain, EGF-like 2
Armcx2	2.98731	1.99875	0.0140128	0.321262	Exon (ENSMUST00000117512.1/ENSMUST00000117512.1, exon 1 of 1)	134828388	134828787	20	134804147	134809221	5075	2	67416	ENSMUST00000168264.1	-19167	ENSMUSG00000033436	armadillo repeat containing, X-linked 2
Nectin1	2.04984	2.45665	0.0140486	0.321262	Promoter (1-2kb)	43745602	43746001	9	43743984	43807461	63478	1	58235	ENSMUST00000034510.8	1618	ENSMUSG00000032012	nectin cell adhesion molecule 1
Tle4	2.54899	-2.63623	0.0140587	0.321262	Promoter (<=1kb)	14595391	14595790	19	14543726	14595539	51814	2	21888	ENSMUST00000235975.1	0	ENSMUSG00000024642	transducin-like enhancer of split 4
Mbnl3	3.56788	-1.47703	0.0140648	0.321262	Promoter (<=1kb)	51205442	51205841	20	51117269	51205832	88564	2	171170	ENSMUST00000114875.7	0	ENSMUSG00000036109	muscleblind like splicing factor 3
Mir672	3.79144	2.03384	0.0141302	0.322037	Distal Intergenic	104068266	104068665	20	104116175	104116274	100	2	751535	ENSMUST00000102331.1	47609	ENSMUSG00000076286	microRNA 672
Nrxn1	2.72678	1.70508	0.0141723	0.322278	Intron (ENSMUST00000072671.13/18189, intron 6 of 20)	90690956	90691355	17	90590194	90700774	110581	2	18189	ENSMUST00000197224.1	9419	ENSMUSG00000024109	neurexin I
Mei1	5.30259	-0.837925	0.0142728	0.323495	Promoter (<=1kb)	82070223	82070622	15	82069997	82126659	56663	1	74369	ENSMUST00000089178.10	226	ENSMUSG00000068117	meiotic double-stranded break formation protein 1
Ephb1	3.348	1.46811	0.0143031	0.323495	Promoter (2-3kb)	102352225	102352624	9	101922128	102354693	432566	2	270190	ENSMUST00000035129.13	2069	ENSMUSG00000032537	Eph receptor B1
Ntrk2	5.35879	0.978064	0.0143452	0.323495	Intron (ENSMUST00000225488.1/18212, intron 16 of 17)	59094468	59094867	13	58871735	58986149	114415	1	18212	ENSMUST00000223636.1	222733	ENSMUSG00000055254	neurotrophic tyrosine kinase, receptor, type 2
Axin2	5.13732	-0.835389	0.0143659	0.323495	Promoter (<=1kb)	108923247	108923646	11	108923181	108949511	26331	1	12006	ENSMUST00000106711.1	66	ENSMUSG00000000142	axin 2
Sned1	5.64379	-0.850749	0.0143839	0.323495	Promoter (<=1kb)	93235728	93236127	1	93235841	93301065	65225	1	208777	ENSMUST00000062202.13	0	ENSMUSG00000047793	sushi, nidogen and EGF-like domains 1
Atoh8	4.41705	-1.00773	0.0144263	0.323737	Distal Intergenic	72189204	72189603	6	72206177	72234537	28361	2	71093	ENSMUST00000206425.1	44934	ENSMUSG00000037621	atonal bHLH transcription factor 8
Gucy2e	7.0664	-0.497957	0.0145307	0.325366	Promoter (<=1kb)	69235981	69236380	11	69218117	69237022	18906	2	14919	ENSMUST00000021259.8	642	ENSMUSG00000020890	guanylate cyclase 2e
Reps2	2.00333	2.68167	0.0146378	0.32642	Intron (ENSMUST00000101102.1/194590, intron 1 of 17)	162578138	162578537	20	162526385	162565612	39228	2	194590	ENSMUST00000155863.1	-12526	ENSMUSG00000040855	RALBP1 associated Eps domain containing protein 2
1700120E14Rik	4.99928	-0.913658	0.0146415	0.32642	Intron (ENSMUST00000125882.7/17919, intron 1 of 4)	74518750	74519149	18	74525253	74531106	5854	2	73606	ENSMUST00000137034.1	11957	NA	RIKEN cDNA 1700120E14 gene
Pja1	3.11782	2.15431	0.0147434	0.32734	Distal Intergenic	99626758	99627157	20	99465734	99471273	5540	2	18744	ENSMUST00000113792.1	-155485	ENSMUSG00000034403	praja ring finger ubiquitin ligase 1
Tle4	3.48131	-1.4066	0.0147468	0.32734	Distal Intergenic	14864203	14864602	19	14448150	14598051	149902	2	21888	ENSMUST00000167776.2	-266152	ENSMUSG00000024642	transducin-like enhancer of split 4
Zdhhc14	3.98623	-1.38359	0.0148603	0.328305	Promoter (1-2kb)	5493664	5494063	17	5492557	5753811	261255	1	224454	ENSMUST00000089185.5	1107	ENSMUSG00000034265	zinc finger, DHHC domain containing 14
Dmxl2	2.35594	-3.37621	0.0148744	0.328305	Promoter (<=1kb)	54502212	54502611	9	54472696	54501626	28931	2	235380	ENSMUST00000149709.1	-586	ENSMUSG00000041268	Dmx-like 2
Asb9	2.21995	2.90843	0.0148865	0.328305	Distal Intergenic	164577963	164578362	20	164506327	164539752	33426	1	69299	ENSMUST00000033756.2	71636	ENSMUSG00000031384	ankyrin repeat and SOCS box-containing 9
Tsix	4.82593	2.24644	0.0149539	0.328372	Promoter (<=1kb)	103422082	103422481	20	103422010	103481705	59696	1	22097	ENSMUST00000182089.1	72	ENSMUSG00000085715	X (inactive)-specific transcript, opposite strand
Igdcc3	2.92566	1.66474	0.0149813	0.328372	Intron (ENSMUST00000034961.5/19289, intron 2 of 13)	65161406	65161805	9	65180738	65181722	985	1	19289	ENSMUST00000217135.1	-18933	ENSMUSG00000032394	immunoglobulin superfamily, DCC subclass, member 3
Kcne3	6.97866	-0.543498	0.0149858	0.328372	Promoter (<=1kb)	100178538	100178937	7	100178688	100184863	6176	1	57442	ENSMUST00000207358.1	0	ENSMUSG00000035165	potassium voltage-gated channel, Isk-related subfamily, gene 3
Pcdhgc5	4.52292	1.0482	0.01513	0.3291	Promoter (1-2kb)	37821039	37821438	18	37819654	37840164	20511	1	93708	ENSMUST00000192875.1	1385	ENSMUSG00000102543	protocadherin gamma subfamily C, 5
Fam222a	2.73012	1.76326	0.0151393	0.3291	Promoter (3-4kb)	114571079	114571478	5	114568017	114594678	26662	1	433940	ENSMUST00000130983.1	3062	ENSMUSG00000041930	family with sequence similarity 222, member A
Bhlhe41	5.65995	-0.677635	0.0151411	0.3291	Promoter (<=1kb)	145865040	145865439	6	145863505	145865302	1798	2	79362	ENSMUST00000111703.1	0	ENSMUSG00000030256	basic helix-loop-helix family, member e41
Abcc12	3.71564	-1.35569	0.0151477	0.3291	Distal Intergenic	86383920	86384319	8	86504583	86534747	30165	2	244562	ENSMUST00000156066.7	150428	ENSMUSG00000036872	ATP-binding cassette, sub-family C (CFTR/MRP), member 12
Plekhh3	3.41708	1.3756	0.0152635	0.330566	Promoter (1-2kb)	101172477	101172876	11	101162679	101171351	8673	2	217198	ENSMUST00000043397.13	-1126	ENSMUSG00000035172	pleckstrin homology domain containing, family H (with MyTH4 domain) member 3
Gm20744	4.35357	0.884437	0.0152798	0.330566	Distal Intergenic	82055048	82055447	7	82070387	82081758	11372	1	434205	ENSMUST00000208972.1	-14940	ENSMUSG00000109145	predicted gene, 20744
Egflam	4.39211	-1.11662	0.015314	0.330608	Promoter (<=1kb)	7398293	7398692	15	7206120	7398304	192185	2	268780	ENSMUST00000058593.9	0	ENSMUSG00000042961	EGF-like, fibronectin type III and laminin G domains
Lhfpl2	4.83325	-0.973924	0.0153722	0.331165	Promoter (<=1kb)	94174332	94174731	13	94173992	94195409	21418	1	218454	ENSMUST00000121618.1	340	ENSMUSG00000045312	lipoma HMGIC fusion partner-like 2
Sgsm1	4.52625	0.797122	0.0154056	0.331189	Intron (ENSMUST00000048112.12/52850, intron 3 of 24)	113288076	113288475	5	113279610	113282892	3283	2	52850	ENSMUST00000138266.1	-5184	ENSMUSG00000042216	small G protein signaling modulator 1
Slit3	3.57439	-2.085	0.0155253	0.332172	Intron (ENSMUST00000069837.3/20564, intron 7 of 35)	35569445	35569844	11	35544685	35612636	67952	1	20564	ENSMUST00000124438.1	24760	ENSMUSG00000056427	slit guidance ligand 3
Hdac8	2.30662	2.74364	0.0155508	0.332172	Intron (ENSMUST00000087916.10/70315, intron 8 of 10)	102403385	102403784	20	102498156	102504741	6586	2	70315	ENSMUST00000154024.1	100957	ENSMUSG00000067567	histone deacetylase 8
Rbfox1	4.70682	1.08688	0.0155598	0.332172	Intron (ENSMUST00000230658.1/268859, intron 4 of 11)	6959726	6960125	16	7069846	7409813	339968	1	268859	ENSMUST00000229741.1	-109721	ENSMUSG00000008658	RNA binding protein, fox-1 homolog (C. elegans) 1
Gpm6b	3.25953	2.23409	0.0156106	0.332172	Intron (ENSMUST00000112235.7/14758, intron 3 of 6)	166377412	166377811	20	166344842	166373287	28446	1	14758	ENSMUST00000129731.1	32570	ENSMUSG00000031342	glycoprotein m6b
Htr6	7.6132	-0.496832	0.0156137	0.332172	Promoter (<=1kb)	139074203	139074602	4	139061409	139074789	13381	2	15565	ENSMUST00000068036.1	187	ENSMUSG00000028747	5-hydroxytryptamine (serotonin) receptor 6
Tnfrsf19	5.07004	-0.900742	0.0157227	0.333798	Promoter (1-2kb)	61044718	61045117	14	60964036	61046469	82434	2	29820	ENSMUST00000111234.9	1352	ENSMUSG00000060548	tumor necrosis factor receptor superfamily, member 19
Mlec	2.56105	1.72316	0.0158182	0.334253	Promoter (<=1kb)	115158316	115158715	5	115142981	115158179	15199	2	109154	ENSMUST00000112121.5	-137	ENSMUSG00000048578	malectin
Mdk	6.76415	0.500402	0.0158494	0.334253	Distal Intergenic	91923168	91923567	2	91929805	91931688	1884	2	17242	ENSMUST00000111309.7	8121	ENSMUSG00000027239	midkine
Pbdc1	3.84053	2.10303	0.0158698	0.334253	Intron (ENSMUST00000119477.1/67683, intron 5 of 5)	105086219	105086618	20	105079775	105083160	3386	1	67683	ENSMUST00000125343.1	6444	ENSMUSG00000031226	polysaccharide biosynthesis domain containing 1
8430437L04Rik	1.57886	-5.11982	0.0158748	0.334253	Distal Intergenic	72626231	72626630	2	72703510	72729468	25959	1	74541	ENSMUST00000124829.1	-76880	ENSMUSG00000085252	RIKEN cDNA 8430437L04 gene
Car8	3.0989	1.61611	0.015991	0.336008	Distal Intergenic	7992509	7992908	4	8143362	8239041	95680	2	12319	ENSMUST00000066674.7	246133	ENSMUSG00000041261	carbonic anhydrase 8
Frmpd4	2.9634	2.18929	0.0160673	0.336419	Intron (ENSMUST00000112147.8/333605, intron 3 of 19)	168201643	168202042	20	167475298	168124290	648993	2	333605	ENSMUST00000239138.1	-77353	ENSMUSG00000049176	FERM and PDZ domain containing 4
Utp6	5.3505	-0.711167	0.0161333	0.336419	Distal Intergenic	79973794	79974193	11	79933953	79962390	28438	2	216987	ENSMUST00000043152.5	-11404	ENSMUSG00000035575	UTP6 small subunit processome component
Srms	6.54623	-0.517684	0.0161377	0.336419	Promoter (<=1kb)	181212468	181212867	2	181205562	181213185	7624	2	20811	ENSMUST00000016498.4	318	ENSMUSG00000027579	src-related kinase lacking C-terminal regulatory tyrosine and N-terminal myristylation sites
Gm8817	1.7509	3.01184	0.0161421	0.336419	Intron (ENSMUST00000146929.1/ENSMUST00000146929.1, intron 3 of 3)	167091504	167091903	20	167063336	167070380	7045	2	667794	ENSMUST00000126769.7	-21124	ENSMUSG00000086008	predicted gene 8817
H2-Q1	7.01944	-0.487446	0.0163535	0.338287	Promoter (<=1kb)	35321333	35321732	17	35320558	35325099	4542	1	15006	ENSMUST00000073208.5	775	ENSMUSG00000079507	histocompatibility 2, Q region locus 1
Slc16a2	4.13377	2.13434	0.0163812	0.338287	Intron (ENSMUST00000042664.9/20502, intron 1 of 5)	103812081	103812480	20	103697414	103821983	124570	2	20502	ENSMUST00000042664.9	9503	ENSMUSG00000033965	solute carrier family 16 (monocarboxylic acid transporters), member 2
Cnfn	6.50812	-0.545541	0.016405	0.338287	Promoter (1-2kb)	25367759	25368158	7	25367620	25369703	2084	2	72383	ENSMUST00000167591.7	1545	ENSMUSG00000063651	cornifelin
Syndig1l	5.90464	-0.712531	0.0164581	0.338287	Promoter (<=1kb)	84698239	84698638	12	84680668	84698614	17947	2	627191	ENSMUST00000221905.1	0	ENSMUSG00000071234	synapse differentiation inducing 1 like
Grpr	1.92108	2.5705	0.016511	0.338287	Distal Intergenic	163419531	163419930	20	163513904	163549677	35774	2	14829	ENSMUST00000033730.2	129747	ENSMUSG00000031364	gastrin releasing peptide receptor
Prps2	2.96564	2.31496	0.0165192	0.338287	Intron (ENSMUST00000238211.1/333605, intron 4 of 16)	167552915	167553314	20	167346322	167382749	36428	2	110639	ENSMUST00000026839.4	-170166	ENSMUSG00000025742	phosphoribosyl pyrophosphate synthetase 2
Tcp11x2	1.46239	3.12632	0.016532	0.338287	Distal Intergenic	135701318	135701717	20	135654698	135693790	39093	2	71841	ENSMUST00000078605.6	-7528	ENSMUSG00000058252	t-complex 11 family, X-linked 2
Amz1	5.13953	-0.813809	0.016581	0.338287	Promoter (<=1kb)	140735551	140735950	5	140735567	140741235	5669	1	231842	ENSMUST00000156006.1	0	ENSMUSG00000050022	archaelysin family metallopeptidase 1
Nlgn3	1.71609	2.64208	0.0166568	0.338287	Exon (ENSMUST00000113671.2/245537, exon 11 of 11)	101320021	101320420	20	101314391	101318151	3761	1	245537	ENSMUST00000144860.1	5630	ENSMUSG00000031302	neuroligin 3
Tenm2	3.73574	-1.23785	0.0166811	0.338287	Intron (ENSMUST00000102801.7/23964, intron 1 of 30)	37155664	37156063	11	36006656	37235882	1229227	2	23964	ENSMUST00000102801.7	79819	ENSMUSG00000049336	teneurin transmembrane protein 2
AU015836	0	4.55374	0.0166928	0.338287	Distal Intergenic	93958562	93958961	20	93968659	93975470	6812	1	385493	ENSMUST00000121565.7	-9698	ENSMUSG00000081044	expressed sequence AU015836
Grin2a	6.05407	-0.650959	0.0166982	0.338287	Promoter (<=1kb)	9994602	9995001	16	9567898	9994923	427026	2	14811	ENSMUST00000199708.4	0	ENSMUSG00000059003	glutamate receptor, ionotropic, NMDA2A (epsilon 1)
1700109G15Rik	1.41478	-4.96578	0.0167131	0.338287	Distal Intergenic	84749332	84749731	11	84716976	84720432	3457	2	78471	ENSMUST00000150735.1	-28900	ENSMUSG00000085044	RIKEN cDNA 1700109G15 gene
C1qa	4.00837	-1.06134	0.0167609	0.338287	Promoter (2-3kb)	136895773	136896172	4	136895917	136898803	2887	2	12259	ENSMUST00000046285.5	2631	ENSMUSG00000036887	complement component 1, q subcomponent, alpha polypeptide
Adamts8	4.97676	-0.729471	0.0167733	0.338287	Promoter (<=1kb)	30944168	30944567	9	30943458	30963838	20381	1	30806	ENSMUST00000163037.1	710	ENSMUSG00000031994	a disintegrin-like and metallopeptidase (reprolysin type) with thrombospondin type 1 motif, 8
Arid3b	1.54295	-5.08508	0.0167983	0.338287	Promoter (<=1kb)	57834755	57835154	9	57790513	57834236	43724	2	56380	ENSMUST00000004780.15	-519	ENSMUSG00000004661	AT rich interactive domain 3B (BRIGHT-like)
Grm2	3.6499	-1.28278	0.0168217	0.338287	Promoter (<=1kb)	106655888	106656287	9	106643117	106656080	12964	2	108068	ENSMUST00000023959.12	0	ENSMUSG00000023192	glutamate receptor, metabotropic 2
Pacsin1	4.40908	0.726664	0.0168737	0.338287	Promoter (<=1kb)	27655398	27655797	17	27655509	27708659	53151	1	23969	ENSMUST00000114873.7	0	ENSMUSG00000040276	protein kinase C and casein kinase substrate in neurons 1
Nav2	1.8315	2.32701	0.0168774	0.338287	Intron (ENSMUST00000183659.7/78286, intron 12 of 39)	49496120	49496519	7	49450760	49464580	13821	1	78286	ENSMUST00000184155.1	45360	ENSMUSG00000052512	neuron navigator 2
Rybp	4.57329	0.928561	0.0168929	0.338287	Distal Intergenic	100336882	100337281	6	100228565	100287485	58921	2	56353	ENSMUST00000101118.3	-49397	ENSMUSG00000072872	RING1 and YY1 binding protein
Arid1b	7.18108	-0.482381	0.0169863	0.339402	Intron (ENSMUST00000124362.1/239985, intron 1 of 2)	5004250	5004649	17	4996429	5098186	101758	1	239985	ENSMUST00000156775.1	7821	ENSMUSG00000069729	AT rich interactive domain 1B (SWI-like)
Dcx	1.49365	3.16465	0.0170351	0.339402	Intron (ENSMUST00000033642.9/13193, intron 3 of 6)	143906616	143907015	20	143869210	143933050	63841	2	13193	ENSMUST00000139920.7	26035	ENSMUSG00000031285	doublecortin
Reps2	0	4.61728	0.0170596	0.339402	Distal Intergenic	162364018	162364417	20	162546220	162552579	6360	2	194590	ENSMUST00000155043.1	188162	ENSMUSG00000040855	RALBP1 associated Eps domain containing protein 2
Nrk	2.11833	2.77531	0.017108	0.339402	Intron (ENSMUST00000064937.13/27206, intron 24 of 27)	138996978	138997377	20	138982718	138989778	7061	1	27206	ENSMUST00000155201.1	14260	ENSMUSG00000052854	Nik related kinase
Foxp1	1.63637	-5.17649	0.0171144	0.339402	Distal Intergenic	98762775	98763174	6	98930171	98935545	5375	2	108655	ENSMUST00000175880.1	172371	ENSMUSG00000030067	forkhead box P1
Chrna3	6.45379	-0.551396	0.0171536	0.339521	Promoter (<=1kb)	55026109	55026508	9	55014230	55026530	12301	2	110834	ENSMUST00000214204.2	22	ENSMUSG00000032303	cholinergic receptor, nicotinic, alpha polypeptide 3
3110039M20Rik	2.49588	1.79264	0.0172424	0.339576	Promoter (<=1kb)	49384937	49385336	12	49385174	49394127	8954	1	67293	ENSMUST00000110746.1	0	ENSMUSG00000104861	RIKEN cDNA 3110039M20 gene
Foxi2	7.07705	-0.499982	0.0172593	0.339576	Promoter (<=1kb)	135410348	135410747	7	135410367	135413615	3249	1	270004	ENSMUST00000238917.1	0	ENSMUSG00000048377	forkhead box I2
L1td1	6.52377	-0.628383	0.0173664	0.339576	Promoter (<=1kb)	98726750	98727149	4	98726793	98733560	6768	1	381591	ENSMUST00000171708.1	0	ENSMUSG00000087166	LINE-1 type transposase domain containing 1
Mid1	3.77594	2.16206	0.0173738	0.339576	Distal Intergenic	169643518	169643917	20	169685199	169990795	305597	1	17318	ENSMUST00000112107.7	-41282	ENSMUSG00000035299	midline 1
Rnf128	2.22952	1.95018	0.0173782	0.339576	Intron (ENSMUST00000113027.7/66889, intron 1 of 6)	139596065	139596464	20	139610620	139673145	62526	1	66889	ENSMUST00000113026.1	-14156	ENSMUSG00000031438	ring finger protein 128
Mir6346	6.47784	-0.633286	0.0173888	0.339576	Intron (ENSMUST00000062483.14/14633, intron 2 of 13)	118917161	118917560	1	118954220	118954300	81	1	102465176	ENSMUST00000183982.1	-36660	ENSMUSG00000098273	microRNA 6346
Ncam1	2.11835	2.2367	0.017423	0.339576	Promoter (<=1kb)	49797748	49798147	9	49531276	49798758	267483	2	17967	ENSMUST00000192584.1	611	ENSMUSG00000039542	neural cell adhesion molecule 1
Gpm6b	3.23554	2.19452	0.0174496	0.339576	Distal Intergenic	166212688	166213087	20	166238911	166388988	150078	1	14758	ENSMUST00000112235.7	-25824	ENSMUSG00000031342	glycoprotein m6b
Ifitm10	6.39038	-0.530673	0.017455	0.339576	Promoter (<=1kb)	142371711	142372110	7	142355508	142372259	16752	2	320802	ENSMUST00000084412.5	149	ENSMUSG00000045777	interferon induced transmembrane protein 10
Mir124-2hg	3.52487	-2.02587	0.0174903	0.339618	Distal Intergenic	17621833	17622232	3	17789921	17800073	10153	1	70441	ENSMUST00000188983.6	-167689	ENSMUSG00000100252	Mir124-2 host gene (non-protein coding)
Frmpd4	3.08068	2.09632	0.0175255	0.339656	Intron (ENSMUST00000112147.8/333605, intron 3 of 19)	168341912	168342311	20	167473973	168448042	974070	2	333605	ENSMUST00000238709.1	105731	ENSMUSG00000049176	FERM and PDZ domain containing 4
1700001C19Rik	5.4174	-0.722585	0.017611	0.340669	Exon (ENSMUST00000150819.2/224833, exon 4 of 5)	47467760	47468159	17	47413628	47437376	23749	2	75462	ENSMUST00000160678.1	-30384	ENSMUSG00000047150	RIKEN cDNA 1700001C19 gene
Tagln2	5.66262	-0.678329	0.0176682	0.34113	Promoter (<=1kb)	172500296	172500695	1	172500245	172505852	5608	1	21346	ENSMUST00000192460.1	51	ENSMUSG00000026547	transgelin 2
9930012K11Rik	4.15621	-0.957133	0.0177519	0.341913	Promoter (<=1kb)	70159691	70160090	14	70154405	70159502	5098	2	268759	ENSMUST00000153871.1	-189	ENSMUSG00000044551	RIKEN cDNA 9930012K11 gene
Prtg	3.04614	-1.8571	0.0177789	0.341913	Intron (ENSMUST00000055535.8/235472, intron 11 of 19)	72880218	72880617	9	72910627	72912305	1679	1	235472	ENSMUST00000184274.1	-30010	ENSMUSG00000036030	protogenin
1700057H15Rik	2.38557	2.02456	0.017868	0.341913	Distal Intergenic	124358673	124359072	4	124450235	124451285	1051	2	78460	ENSMUST00000156566.1	92213	NA	RIKEN cDNA 1700057H15 gene
Mir22hg	3.80454	-1.16138	0.0178819	0.341913	Promoter (<=1kb)	75461270	75461669	11	75461539	75466676	5138	1	100042498	ENSMUST00000149940.1	0	ENSMUSG00000085148	Mir22 host gene (non-protein coding)
Pja1	4.72582	1.64686	0.0178906	0.341913	Distal Intergenic	99550386	99550785	20	99465734	99471273	5540	2	18744	ENSMUST00000113792.1	-79113	ENSMUSG00000034403	praja ring finger ubiquitin ligase 1
Itgb4	2.82268	-1.93492	0.0179092	0.341913	Promoter (<=1kb)	115989431	115989830	11	115989938	115991050	1113	1	192897	ENSMUST00000150129.1	-108	ENSMUSG00000020758	integrin beta 4
Gm15246	0.801135	3.87401	0.0180251	0.343267	Exon (ENSMUST00000129410.1/ENSMUST00000129410.1, exon 6 of 6)	169474913	169475312	20	169320622	169368190	47569	1	101055907	ENSMUST00000149873.1	154291	ENSMUSG00000087159	predicted gene 15246
Ebf1	3.57842	-1.19322	0.018109	0.343267	Intron (ENSMUST00000109268.1/13591, intron 15 of 15)	45003671	45004070	11	44912138	44972914	60777	1	13591	ENSMUST00000140822.1	91533	ENSMUSG00000057098	early B cell factor 1
Tnfrsf19	1.27819	-4.83122	0.0181355	0.343267	Intron (ENSMUST00000063562.8/70478, intron 18 of 18)	60895623	60896022	14	60966351	60975885	9535	2	29820	ENSMUST00000225501.1	79863	ENSMUSG00000060548	tumor necrosis factor receptor superfamily, member 19
Slc17a9	1.27819	-4.83122	0.0181355	0.343267	Distal Intergenic	180754539	180754938	2	180738274	180741416	3143	1	228993	ENSMUST00000140955.1	16265	ENSMUSG00000023393	solute carrier family 17, member 9
Scml2	2.94273	2.15769	0.0181479	0.343267	Promoter (<=1kb)	161162826	161163225	20	161163060	161255659	92600	1	107815	ENSMUST00000077375.4	0	ENSMUSG00000000037	Scm polycomb group protein like 2
Gtdc1	4.48453	-0.861317	0.0182062	0.343734	Distal Intergenic	44556842	44557241	2	44565133	44571347	6215	2	227835	ENSMUST00000134813.1	14106	ENSMUSG00000036890	glycosyltransferase-like domain containing 1
Nsd1	1.78278	2.32693	0.0182426	0.343787	Promoter (<=1kb)	55210636	55211035	13	55210735	55240846	30112	1	18193	ENSMUST00000224156.1	0	ENSMUSG00000021488	nuclear receptor-binding SET-domain protein 1
7530416G11Rik	1.93553	2.47356	0.018391	0.345947	Distal Intergenic	85466745	85467144	15	85492736	85503227	10492	2	328577	ENSMUST00000178942.1	36083	ENSMUSG00000096607	RIKEN cDNA 7530416G11 gene
Kifc5b	2.9941	1.39781	0.0184917	0.346178	Promoter (<=1kb)	26916660	26917059	17	26917091	26921508	4418	1	16580	ENSMUST00000236476.1	-32	ENSMUSG00000024301	kinesin family member C5B
Elfn2	5.88692	-0.691991	0.0185115	0.346178	Promoter (2-3kb)	78672131	78672530	15	78674383	78675226	844	2	207393	ENSMUST00000230478.1	2696	ENSMUSG00000043460	leucine rich repeat and fibronectin type III, extracellular 2
Gramd3	3.93014	1.13481	0.0185194	0.346178	Distal Intergenic	55819247	55819646	18	56400337	56503564	103228	1	107022	ENSMUST00000237355.1	-580691	ENSMUSG00000001700	GRAM domain containing 3
Mid1	4.1581	2.04488	0.018544	0.346178	Intron (ENSMUST00000112107.7/17318, intron 1 of 9)	169704817	169705216	20	169685199	169990798	305600	1	17318	ENSMUST00000112104.7	19618	ENSMUSG00000035299	midline 1
Kcnq1	6.66141	-0.508662	0.0186296	0.346178	Promoter (<=1kb)	143107083	143107482	7	143107254	143427042	319789	1	16535	ENSMUST00000009689.10	0	ENSMUSG00000009545	potassium voltage-gated channel, subfamily Q, member 1
Frmpd4	0.124285	4.94037	0.0186808	0.346178	Intron (ENSMUST00000238211.1/333605, intron 1 of 16)	167745822	167746221	20	167471309	167855077	383769	2	333605	ENSMUST00000238211.1	108856	ENSMUSG00000049176	FERM and PDZ domain containing 4
Cdhr3	2.87238	-2.37036	0.0187014	0.346178	Downstream (<1kb)	33111030	33111429	12	33033796	33092875	59080	2	68764	ENSMUST00000095774.2	-18155	ENSMUSG00000035860	cadherin-related family member 3
Frmpd4	0.0828338	4.89989	0.0187126	0.346178	Intron (ENSMUST00000112147.8/333605, intron 1 of 19)	168556848	168557247	20	167471309	168577231	1105923	2	333605	ENSMUST00000112147.8	19984	ENSMUSG00000049176	FERM and PDZ domain containing 4
Rai2	2.8917	2.35872	0.0187295	0.346178	Distal Intergenic	161806331	161806730	20	161717627	161779496	61870	1	24004	ENSMUST00000061514.7	88704	ENSMUSG00000043518	retinoic acid induced 2
Nab2	5.80107	0.719372	0.0188223	0.346178	Promoter (1-2kb)	127663201	127663600	10	127664925	127665481	557	2	17937	ENSMUST00000128780.1	1881	ENSMUSG00000025402	Ngfi-A binding protein 2
Nrk	1.41921	3.07307	0.018823	0.346178	Distal Intergenic	138851366	138851765	20	138914430	139009092	94663	1	27206	ENSMUST00000064937.13	-62665	ENSMUSG00000052854	Nik related kinase
Tsc22d3	5.08398	0.848145	0.0188452	0.346178	Intron (ENSMUST00000112996.8/14605, intron 2 of 3)	140575423	140575822	20	140540262	140600659	60398	2	14605	ENSMUST00000112996.8	24837	ENSMUSG00000031431	TSC22 domain family, member 3
Itm2b	3.95091	-1.09818	0.0188873	0.346178	Distal Intergenic	73391068	73391467	14	73362226	73385289	23064	2	16432	ENSMUST00000022704.8	-5779	ENSMUSG00000022108	integral membrane protein 2B
Gm266	8.10064	-0.531742	0.0188997	0.346178	Promoter (<=1kb)	111485679	111486078	12	111484609	111485823	1215	2	212539	ENSMUST00000010673.6	0	ENSMUSG00000010529	predicted gene 266
Eda	0	4.69609	0.0189107	0.346178	Intron (ENSMUST00000134582.1/13607, intron 1 of 1)	100122678	100123077	20	99975781	100397156	421376	1	13607	ENSMUST00000071453.2	146897	ENSMUSG00000059327	ectodysplasin-A
Pak3	2.70708	2.42757	0.0190188	0.347535	Intron (ENSMUST00000033640.13/18481, intron 1 of 15)	143553909	143554308	20	143518698	143765378	246681	1	18481	ENSMUST00000134402.7	35211	ENSMUSG00000031284	p21 (RAC1) activated kinase 3
Gm16793	4.85874	-0.815777	0.0191529	0.348787	Promoter (<=1kb)	35589122	35589521	8	35582503	35588972	6470	2	100504714	ENSMUST00000181322.2	-150	ENSMUSG00000097357	predicted gene, 16793
Eif2s3x	5.78576	2.16617	0.0191555	0.348787	Distal Intergenic	94173543	94173942	20	94199641	94212651	13011	2	26905	ENSMUST00000113922.1	38709	ENSMUSG00000035150	eukaryotic translation initiation factor 2, subunit 3, structural gene X-linked
Hs3st3a1	6.9004	-0.457389	0.0192405	0.349712	Promoter (<=1kb)	64435818	64436217	11	64435332	64522841	87510	1	15478	ENSMUST00000058652.5	486	ENSMUSG00000047759	heparan sulfate (glucosamine) 3-O-sulfotransferase 3A1
Parp14	5.71292	-0.662938	0.0194007	0.351956	Promoter (<=1kb)	35871769	35872168	16	35832874	35871544	38671	2	547253	ENSMUST00000042665.8	-225	ENSMUSG00000034422	poly (ADP-ribose) polymerase family, member 14
Nhsl2	4.27078	1.61611	0.0194327	0.351956	Promoter (<=1kb)	102005579	102005978	20	102005044	102077856	72813	1	100042480	ENSMUST00000144753.1	535	ENSMUSG00000079481	NHS-like 2
Rai2	2.63877	2.52095	0.0195689	0.353795	Exon (ENSMUST00000120823.1/ENSMUST00000120823.1, exon 1 of 1)	161485726	161486125	20	161717069	161779494	62426	1	24004	ENSMUST00000112338.1	-230944	ENSMUSG00000043518	retinoic acid induced 2
Ntrk2	2.17024	1.90729	0.0196801	0.354032	Intron (ENSMUST00000225488.1/18212, intron 12 of 17)	58963479	58963878	13	58871735	58986149	114415	1	18212	ENSMUST00000223636.1	91744	ENSMUSG00000055254	neurotrophic tyrosine kinase, receptor, type 2
Tmem164	1.76108	2.50284	0.0197419	0.354032	Distal Intergenic	142550692	142551091	20	142681406	142843494	162089	1	209497	ENSMUST00000112889.7	-130315	ENSMUSG00000047045	transmembrane protein 164
Wnt7a	4.67972	0.781787	0.0197731	0.354032	Promoter (<=1kb)	91410733	91411132	6	91363981	91411363	47383	2	22421	ENSMUST00000032180.6	231	ENSMUSG00000030093	wingless-type MMTV integration site family, member 7A
Dnaaf6b	1.68118	2.92268	0.0197868	0.354032	Distal Intergenic	140139335	140139734	20	140062879	140106797	43919	1	331537	ENSMUST00000044806.2	76456	ENSMUSG00000042433	dynein axonemal assembly factor 6B
Rps6ka3	1.68118	2.92268	0.0197868	0.354032	Distal Intergenic	159074519	159074918	20	159210307	159364502	154196	1	110651	ENSMUST00000112493.7	-135389	ENSMUSG00000031309	ribosomal protein S6 kinase polypeptide 3
1700031F05Rik	0.535699	3.58122	0.0198051	0.354032	Promoter (<=1kb)	102865944	102866343	20	102859186	102866353	7168	2	73300	ENSMUST00000048061.12	10	ENSMUSG00000032894	RIKEN cDNA 1700031F05 gene
Agap1	5.49085	0.719361	0.0198242	0.354032	Intron (ENSMUST00000027521.14/347722, intron 11 of 17)	89748568	89748967	1	89789163	89834588	45426	1	347722	ENSMUST00000212924.1	-40196	ENSMUSG00000055013	ArfGAP with GTPase domain, ankyrin repeat and PH domain 1
Platr26	3.25597	-1.5458	0.0199863	0.356307	Distal Intergenic	71698143	71698542	2	71719417	71730966	11550	1	381371	ENSMUST00000079720.5	-20875	ENSMUSG00000064263	pluripotency associated transcript 26
Zbtb8b	4.84199	-0.848822	0.0201134	0.357949	Promoter (<=1kb)	129440450	129440849	4	129425765	129440818	15054	2	215627	ENSMUST00000053042.5	0	ENSMUSG00000048485	zinc finger and BTB domain containing 8b
Gm1720	4.3526	1.95399	0.0201651	0.358246	Intron (ENSMUST00000135086.1/382255, intron 6 of 8)	166680511	166680910	20	166662025	166689812	27788	1	382255	ENSMUST00000135086.1	18486	ENSMUSG00000086860	predicted gene 1720
Runx2	6.35616	-0.560559	0.0202181	0.358565	Promoter (<=1kb)	44735444	44735843	17	44606260	44735710	129451	2	12393	ENSMUST00000162878.7	0	ENSMUSG00000039153	runt related transcription factor 2
Rasd1	6.19428	-0.596803	0.0203248	0.359834	Promoter (<=1kb)	59964304	59964703	11	59963181	59964944	1764	2	19416	ENSMUST00000062405.7	241	ENSMUSG00000049892	RAS, dexamethasone-induced 1
Sez6l	5.58399	0.679305	0.0204963	0.361932	Promoter (<=1kb)	112576358	112576757	5	112422009	112576868	154860	2	56747	ENSMUST00000212758.1	111	ENSMUSG00000058153	seizure related 6 homolog like
Atg4a	6.77033	2.14865	0.0205141	0.361932	Intron (ENSMUST00000112971.1/666468, intron 9 of 12)	140997187	140997586	20	140956950	140992837	35888	1	666468	ENSMUST00000153742.1	40237	ENSMUSG00000079418	autophagy related 4A, cysteine peptidase
Armcx4	2.97245	2.06035	0.0205791	0.362019	Exon (ENSMUST00000124226.2/100503043, exon 6 of 6)	134691923	134692322	20	134686519	134696757	10239	1	100503043	ENSMUST00000124226.2	5404	ENSMUSG00000049804	armadillo repeat containing, X-linked 4
Sox1	2.55365	1.6768	0.0205898	0.362019	Distal Intergenic	12479314	12479713	8	12396403	12396488	86	1	20664	ENSMUST00000174915.1	82911	ENSMUSG00000096014	SRY (sex determining region Y)-box 1
Oxr1	3.33862	-1.40401	0.0206542	0.362529	Promoter (<=1kb)	41789214	41789613	15	41789381	41827029	37649	1	170719	ENSMUST00000230778.1	0	ENSMUSG00000022307	oxidation resistance 1
Sel1l3	3.30414	-1.63791	0.020811	0.364166	Exon (ENSMUST00000031090.7/231238, exon 10 of 24)	53155367	53155766	5	53155595	53173112	17518	2	231238	ENSMUST00000196550.1	17346	ENSMUSG00000029189	sel-1 suppressor of lin-12-like 3 (C. elegans)
Col4a6	2.39899	2.61702	0.0208533	0.364166	Promoter (<=1kb)	141474198	141474597	20	141165403	141474076	308674	2	94216	ENSMUST00000101205.2	-122	ENSMUSG00000031273	collagen, type IV, alpha 6
Morf4l2	3.65246	0.898309	0.0208542	0.364166	Promoter (<=1kb)	136741351	136741750	20	136732942	136741661	8720	2	56397	ENSMUST00000033797.12	0	ENSMUSG00000031422	mortality factor 4 like 2
Bcor	3.54845	1.80481	0.021037	0.366733	Distal Intergenic	11807065	11807464	20	12036740	12080553	43814	2	71458	ENSMUST00000065143.13	273089	ENSMUSG00000040363	BCL6 interacting corepressor
Tmem28	1.08151	3.29012	0.0211303	0.367061	Intron (ENSMUST00000096363.2/620592, intron 1 of 2)	99827076	99827475	20	99821021	99848790	27770	1	620592	ENSMUST00000096363.2	6055	ENSMUSG00000071719	transmembrane protein 28
Arhgap15	3.81885	-1.20074	0.0211684	0.367061	Intron (ENSMUST00000112824.7/76117, intron 2 of 14)	43787310	43787709	2	43748870	44387623	638754	1	76117	ENSMUST00000055776.7	38440	ENSMUSG00000049744	Rho GTPase activating protein 15
Ddr1	1.39382	2.80737	0.0211864	0.367061	Promoter (<=1kb)	35699272	35699671	17	35682431	35700552	18122	2	12305	ENSMUST00000155957.7	881	ENSMUSG00000003534	discoidin domain receptor family, member 1
Rai2	2.07675	2.71859	0.0212344	0.367061	Distal Intergenic	161689956	161690355	20	161717069	161779494	62426	1	24004	ENSMUST00000112338.1	-26714	ENSMUSG00000043518	retinoic acid induced 2
Ate1	4.16424	0.778098	0.0212353	0.367061	Intron (ENSMUST00000124096.7/14183, intron 2 of 6)	130369235	130369634	7	130394345	130418790	24446	2	11907	ENSMUST00000208116.1	49156	ENSMUSG00000030850	arginyltransferase 1
Mctp1	4.00019	-1.04239	0.021353	0.368475	Promoter (<=1kb)	76383675	76384074	13	76384535	77031810	647276	1	78771	ENSMUST00000125209.7	-461	ENSMUSG00000021596	multiple C2 domains, transmembrane 1
Gfra1	6.87648	-0.452228	0.0215179	0.370353	Promoter (<=1kb)	58453171	58453570	19	58236692	58454466	217775	2	14585	ENSMUST00000169850.7	896	ENSMUSG00000025089	glial cell line derived neurotrophic factor family receptor alpha 1
Gm14827	3.00193	2.22318	0.0215566	0.370353	Distal Intergenic	94455229	94455628	20	94442732	94447727	4996	1	100503393	ENSMUST00000146644.1	12497	ENSMUSG00000084904	predicted gene 14827
Skor2	6.69239	-0.609838	0.0215705	0.370353	Distal Intergenic	76817887	76818286	18	76856405	76900342	43938	1	664805	ENSMUST00000166956.1	-38119	ENSMUSG00000091519	SKI family transcriptional corepressor 2
Prrg4	4.27896	-0.929116	0.0216206	0.370593	Promoter (<=1kb)	104849516	104849915	2	104830741	104849876	19136	2	228413	ENSMUST00000028593.10	0	ENSMUSG00000027171	proline rich Gla (G-carboxyglutamic acid) 4 (transmembrane)
Sp9	4.49324	1.10602	0.0217105	0.370892	Promoter (4-5kb)	73276395	73276794	2	73271966	73284706	12741	1	381373	ENSMUST00000147133.1	4429	ENSMUSG00000068859	trans-acting transcription factor 9
Foxa2	3.23278	1.17801	0.0218149	0.370892	Distal Intergenic	147906380	147906779	2	148044240	148045464	1225	2	15376	ENSMUST00000146242.1	138685	ENSMUSG00000037025	forkhead box A2
Hlx	8.14479	0.622685	0.0218189	0.370892	Promoter (4-5kb)	184726235	184726634	1	184727147	184731598	4452	2	15284	ENSMUST00000174257.2	4964	ENSMUSG00000039377	H2.0-like homeobox
H2al1j	1.37612	3.01905	0.0218698	0.370892	Distal Intergenic	11446287	11446686	20	11327822	11328151	330	1	236663	ENSMUST00000091180.2	118465	ENSMUSG00000069038	H2A histone family member L1J
Phka2	1.37612	3.01905	0.0218698	0.370892	Exon (ENSMUST00000112408.8/237175, exon 22 of 28)	160483903	160484302	20	160502166	160591141	88976	1	110094	ENSMUST00000112377.7	-17864	ENSMUSG00000031295	phosphorylase kinase alpha 2
Vax1	6.81958	-0.697248	0.0218724	0.370892	Distal Intergenic	59193990	59194389	19	59166187	59170056	3870	2	22326	ENSMUST00000172821.3	-23934	ENSMUSG00000006270	ventral anterior homeobox 1
Neurod1	2.7021	-2.23812	0.0218918	0.370892	Intron (ENSMUST00000153602.7/228094, intron 1 of 10)	79449255	79449654	2	79452521	79456751	4231	2	18012	ENSMUST00000041099.4	7097	ENSMUSG00000034701	neurogenic differentiation 1
Lgr5	4.60703	-1.10092	0.0219444	0.371168	Intron (ENSMUST00000020350.14/14160, intron 6 of 17)	115472364	115472763	10	115457845	115463079	5235	2	14160	ENSMUST00000144732.1	-9285	ENSMUSG00000020140	leucine rich repeat containing G protein coupled receptor 5
Dbndd2	4.93192	-0.828707	0.0220012	0.371515	Promoter (<=1kb)	164485780	164486179	2	164486106	164490767	4662	1	52840	ENSMUST00000109350.8	0	ENSMUSG00000017734	dysbindin (dystrobrevin binding protein 1) domain containing 2
Tmem161b	3.87357	0.877947	0.0220801	0.372233	Distal Intergenic	84345561	84345960	13	84251271	84286738	35468	1	72745	ENSMUST00000225708.1	94290	ENSMUSG00000035762	transmembrane protein 161B
Ccl1	2.66667	-2.70241	0.0221574	0.372922	Intron (ENSMUST00000138333.1/20290, intron 9 of 10)	82187377	82187776	11	82176659	82179812	3154	2	20290	ENSMUST00000021043.4	-7565	ENSMUSG00000020702	chemokine (C-C motif) ligand 1
Mecom	4.27661	-1.04888	0.022226	0.373164	Intron (ENSMUST00000173495.7/14013, intron 1 of 15)	30219129	30219528	3	29952567	30238162	285596	2	14013	ENSMUST00000173059.7	18634	ENSMUSG00000027684	MDS1 and EVI1 complex locus
Swsap1	2.11645	2.0951	0.0222447	0.373164	Exon (ENSMUST00000046371.12/235044, exon 9 of 10)	21947358	21947757	9	21955755	21958264	2510	1	66962	ENSMUST00000053583.6	-7998	ENSMUSG00000051238	SWIM type zinc finger 7 associated protein 1
Kiz	8.54575	0.697867	0.0223956	0.374385	Intron (ENSMUST00000139345.1/ENSMUST00000139345.1, intron 1 of 1)	146838882	146839281	2	146855864	146970097	114234	1	228730	ENSMUST00000099278.8	-16583	ENSMUSG00000074749	kizuna centrosomal protein
Armc2	3.06736	-1.56713	0.0223984	0.374385	Promoter (2-3kb)	41990280	41990679	10	41986614	41993166	6553	2	213402	ENSMUST00000161167.1	2487	ENSMUSG00000071324	armadillo repeat containing 2
Tmsb4x	2.02586	2.65021	0.0224272	0.374385	Distal Intergenic	167192268	167192667	20	167207292	167208827	1536	2	19241	ENSMUST00000112175.1	16160	ENSMUSG00000049775	thymosin, beta 4, X chromosome
Ctps2	1.86251	2.76612	0.0225399	0.374877	Distal Intergenic	163065231	163065630	20	162969105	163031319	62215	1	55936	ENSMUST00000112300.1	96126	ENSMUSG00000031360	cytidine 5'-triphosphate synthase 2
Mir124-2hg	3.80736	-1.16582	0.0225714	0.374877	Promoter (<=1kb)	17793447	17793846	3	17793920	17795405	1486	1	70441	ENSMUST00000186746.1	-74	ENSMUSG00000100252	Mir124-2 host gene (non-protein coding)
4933406G16Rik	3.79905	-1.40508	0.0225897	0.374877	Distal Intergenic	19095167	19095566	11	19065276	19075740	10465	1	74059	ENSMUST00000144854.1	29891	ENSMUSG00000086025	RIKEN cDNA 4933406G16 gene
Slc16a8	6.2511	-0.636038	0.0226032	0.374877	Promoter (1-2kb)	79252597	79252996	15	79251014	79254761	3748	2	57274	ENSMUST00000039752.3	1765	ENSMUSG00000032988	solute carrier family 16 (monocarboxylic acid transporters), member 8
Nkain4	0.784159	3.05054	0.0226785	0.375516	Promoter (<=1kb)	180954334	180954733	2	180934772	180954699	19928	2	58237	ENSMUST00000103053.9	0	ENSMUSG00000027574	Na+/K+ transporting ATPase interacting 4
Slc37a2	3.04868	-1.79371	0.022841	0.376723	Promoter (<=1kb)	37255290	37255689	9	37230316	37255414	25099	2	56857	ENSMUST00000161114.1	0	ENSMUSG00000032122	solute carrier family 37 (glycerol-3-phosphate transporter), member 2
3632454L22Rik	1.84174	2.7381	0.0228465	0.376723	Promoter (<=1kb)	135061020	135061419	20	135023533	135060336	36804	2	320606	ENSMUST00000142907.7	-684	ENSMUSG00000089759	RIKEN cDNA 3632454L22 gene
Nnmt	1.96795	-2.99947	0.0228618	0.376723	Intron (ENSMUST00000093852.4/235320, intron 4 of 6)	48693983	48694382	9	48591877	48605153	13277	2	18113	ENSMUST00000119426.1	-88830	ENSMUSG00000032271	nicotinamide N-methyltransferase
Gja3	7.00835	-0.464914	0.0229425	0.376982	Promoter (<=1kb)	57057530	57057929	14	57036844	57057723	20880	2	14611	ENSMUST00000223792.1	0	ENSMUSG00000048582	gap junction protein, alpha 3
A730046J19Rik	1.62004	2.84358	0.0230328	0.376982	Intron (ENSMUST00000135687.1/319764, intron 2 of 2)	144159416	144159815	20	144153695	144166274	12580	1	319764	ENSMUST00000135687.1	5721	ENSMUSG00000085139	RIKEN cDNA A730046J19 gene
Gm20052	4.91158	0.74897	0.0231033	0.376982	Promoter (2-3kb)	37896764	37897163	5	37894707	37897137	2431	1	102637176	ENSMUST00000201327.1	2057	ENSMUSG00000106718	predicted gene, 20052
Mpped1	3.29461	1.22183	0.0231267	0.376982	Promoter (<=1kb)	83778642	83779041	15	83779467	83792131	12665	1	223726	ENSMUST00000109469.1	-426	ENSMUSG00000041708	metallophosphoesterase domain containing 1
Esrrg	2.4056	-2.48378	0.0231281	0.376982	Intron (ENSMUST00000127489.7/26381, intron 3 of 3)	187941340	187941739	1	187997827	188214885	217059	1	26381	ENSMUST00000027906.12	-56088	ENSMUSG00000026610	estrogen-related receptor gamma
Gchfr	5.19358	-0.694582	0.0231293	0.376982	Promoter (<=1kb)	119167679	119168078	2	119167773	119172390	4618	1	320415	ENSMUST00000057454.3	0	ENSMUSG00000046814	GTP cyclohydrolase I feedback regulator
Zdhhc15	2.54956	2.39096	0.0231354	0.376982	Distal Intergenic	104730256	104730655	20	104536969	104671064	134096	2	108672	ENSMUST00000042070.5	-59192	ENSMUSG00000033906	zinc finger, DHHC domain containing 15
Sstr2	5.86115	-0.698199	0.023232	0.377127	Promoter (<=1kb)	113620132	113620531	11	113619476	113625895	6420	1	20606	ENSMUST00000106630.1	656	ENSMUSG00000047904	somatostatin receptor 2
Nox1	2.09708	2.29711	0.0232391	0.377127	Promoter (3-4kb)	134133317	134133716	20	134107733	134137711	29979	2	237038	ENSMUST00000159231.2	3995	ENSMUSG00000031257	NADPH oxidase 1
Mir8110	4.01091	-1.07444	0.0232899	0.377127	Promoter (1-2kb)	89025830	89026229	8	89024735	89024831	97	1	102465899	ENSMUST00000183771.1	1095	ENSMUSG00000099078	microRNA 8110
Cldn34a	2.32258	2.51116	0.0233316	0.377127	Exon (ENSMUST00000238455.1/ENSMUST00000238455.1, exon 1 of 2)	152537582	152537981	20	152563334	152563969	636	1	635396	ENSMUST00000164764.1	-25353	ENSMUSG00000091863	claudin 34A
Tmsb4x	2.32258	2.51116	0.0233316	0.377127	Distal Intergenic	167195745	167196144	20	167207292	167208827	1536	2	19241	ENSMUST00000112175.1	12683	ENSMUSG00000049775	thymosin, beta 4, X chromosome
Pgrmc2	2.25906	-3.22055	0.0233841	0.377127	Distal Intergenic	41276529	41276928	3	41066326	41083046	16721	2	70804	ENSMUST00000058578.7	-193483	ENSMUSG00000049940	progesterone receptor membrane component 2
Rgs8	3.68335	1.04723	0.0234023	0.377127	Promoter (<=1kb)	153652873	153653272	1	153653025	153700323	47299	1	67792	ENSMUST00000041776.11	0	ENSMUSG00000042671	regulator of G-protein signaling 8
Vsig1	3.48059	2.04313	0.0234806	0.377793	Distal Intergenic	140868795	140869194	20	140907608	140939472	31865	1	78789	ENSMUST00000033806.4	-38414	ENSMUSG00000031430	V-set and immunoglobulin domain containing 1
H2-Ab1	6.25754	-0.620943	0.0235266	0.37794	Promoter (1-2kb)	34264883	34265282	17	34263331	34268156	4826	1	14961	ENSMUST00000236643.1	1552	ENSMUSG00000073421	histocompatibility 2, class II antigen A, beta 1
Lrrc8e	3.63682	1.00789	0.0235928	0.377954	Promoter (<=1kb)	4226693	4227092	8	4226827	4237470	10644	1	72267	ENSMUST00000053035.6	0	ENSMUSG00000046589	leucine rich repeat containing 8 family, member E
Ahi1	2.79535	1.56891	0.0236014	0.377954	Intron (ENSMUST00000215135.1/ENSMUST00000215135.1, intron 1 of 1)	21101394	21101793	10	21069845	21074406	4562	1	52906	ENSMUST00000215543.1	31549	ENSMUSG00000019986	Abelson helper integration site 1
1600027J07Rik	3.77737	1.0011	0.0236966	0.378732	Intron (ENSMUST00000209324.1/ENSMUST00000209324.1, intron 2 of 3)	103316798	103317197	8	103343878	103347534	3657	2	69794	ENSMUST00000209501.1	30337	ENSMUSG00000110340	RIKEN cDNA 1600027J07 gene
Relb	3.04451	1.29865	0.0237481	0.378732	Promoter (<=1kb)	19628615	19629014	7	19616375	19628784	12410	2	19698	ENSMUST00000130543.7	0	ENSMUSG00000002983	avian reticuloendotheliosis viral (v-rel) oncogene related B
Drd2	6.02926	-0.634111	0.023792	0.378732	Promoter (<=1kb)	49340916	49341315	9	49340627	49408177	67551	1	13489	ENSMUST00000075764.7	289	ENSMUSG00000032259	dopamine receptor D2
Glra2	0.435193	3.46954	0.023798	0.378732	Intron (ENSMUST00000058787.8/237213, intron 4 of 8)	165265058	165265457	20	165129017	165327393	198377	2	237213	ENSMUST00000058787.8	61936	ENSMUSG00000018589	glycine receptor, alpha 2 subunit
Mir384	4.15158	1.8583	0.023869	0.379273	Distal Intergenic	105274137	105274536	20	105344282	105344369	88	2	723861	ENSMUST00000083565.1	69833	ENSMUSG00000065499	microRNA 384
Map3k15	2.44793	2.45633	0.0239205	0.379502	Intron (ENSMUST00000033665.8/270672, intron 2 of 28)	160002089	160002488	20	159988433	160123351	134919	1	270672	ENSMUST00000033665.8	13656	ENSMUSG00000031303	mitogen-activated protein kinase kinase kinase 15
Gm1720	1.87172	2.77768	0.0239905	0.379516	Intron (ENSMUST00000153701.1/ENSMUST00000153701.1, intron 2 of 5)	166860012	166860411	20	166662025	166689812	27788	1	382255	ENSMUST00000135086.1	197987	ENSMUSG00000086860	predicted gene 1720
Ank2	4.12172	0.743393	0.0239956	0.379516	Promoter (<=1kb)	127162241	127162640	3	127031173	127162346	131174	2	109676	ENSMUST00000182994.7	0	ENSMUSG00000032826	ankyrin 2, brain
Auts2	3.43238	-1.34094	0.0240539	0.379851	Intron (ENSMUST00000161226.8/319974, intron 2 of 18)	132227170	132227569	5	132030909	132050409	19501	2	319974	ENSMUST00000185450.6	-176761	ENSMUSG00000029673	autism susceptibility candidate 2
4933406G16Rik	2.72534	-2.21397	0.0241139	0.379893	Distal Intergenic	19109733	19110132	11	19065276	19075740	10465	1	74059	ENSMUST00000144854.1	44457	ENSMUSG00000086025	RIKEN cDNA 4933406G16 gene
Mir384	3.17405	2.09523	0.0241308	0.379893	Promoter (1-2kb)	105346010	105346409	20	105344282	105344369	88	2	723861	ENSMUST00000083565.1	-1641	ENSMUSG00000065499	microRNA 384
Sorbs3	5.48256	-0.674629	0.0242235	0.380129	Exon (ENSMUST00000227653.1/20410, exon 12 of 21)	70191781	70192180	14	70180932	70204623	23692	2	20410	ENSMUST00000227259.1	12443	ENSMUSG00000022091	sorbin and SH3 domain containing 3
Kcnd3os	4.30028	0.718768	0.0242375	0.380129	Promoter (<=1kb)	105451602	105452001	3	105441595	105451727	10133	2	78635	ENSMUST00000143893.1	0	ENSMUSG00000074346	potassium voltage-gated channel, Shal-related family, member 3, opposite strand
Efnb2	5.88332	-0.753463	0.0242573	0.380129	Exon (ENSMUST00000208416.1/ENSMUST00000208416.1, exon 1 of 2)	8488314	8488713	8	8620597	8639363	18767	2	13642	ENSMUST00000152698.1	150650	ENSMUSG00000001300	ephrin B2
Agap1	3.01223	1.27803	0.0243162	0.38047	Intron (ENSMUST00000027521.14/347722, intron 1 of 17)	89518438	89518837	1	89580236	89895277	315042	1	347722	ENSMUST00000074945.7	-61399	ENSMUSG00000055013	ArfGAP with GTPase domain, ankyrin repeat and PH domain 1
Col25a1	1.41988	-4.9647	0.0244051	0.381073	Intron (ENSMUST00000143830.2/77018, intron 2 of 19)	130343970	130344369	3	130181484	130595102	413619	1	77018	ENSMUST00000238846.1	162486	ENSMUSG00000058897	collagen, type XXV, alpha 1
Cdon	3.27816	-2.13281	0.0244292	0.381073	Intron (ENSMUST00000119129.9/57810, intron 15 of 19)	35485045	35485444	9	35457478	35470085	12608	1	57810	ENSMUST00000127264.1	27567	ENSMUSG00000038119	cell adhesion molecule-related/down-regulated by oncogenes
Mn1	3.65455	0.986324	0.0245861	0.382772	Promoter (2-3kb)	111419676	111420075	5	111417442	111457033	39592	1	433938	ENSMUST00000094463.4	2234	ENSMUSG00000070576	meningioma 1
Syne1	5.13024	0.751083	0.0246509	0.382772	Intron (ENSMUST00000215295.1/64009, intron 141 of 145)	5035763	5036162	10	5021579	5069063	47485	2	64009	ENSMUST00000095899.4	32901	ENSMUSG00000096054	spectrin repeat containing, nuclear envelope 1
Tmcc3	2.58885	1.50869	0.0246645	0.382772	Promoter (<=1kb)	94515545	94515944	10	94514857	94590956	76100	1	319880	ENSMUST00000065060.11	688	ENSMUSG00000020023	transmembrane and coiled coil domains 3
Mixl1	6.9522	-0.483013	0.0246878	0.382772	Promoter (<=1kb)	180696666	180697065	1	180693043	180697034	3992	2	27217	ENSMUST00000027778.7	0	ENSMUSG00000026497	Mix1 homeobox-like 1 (Xenopus laevis)
Alox5	4.6518	-0.806234	0.0247415	0.383025	Promoter (<=1kb)	116460658	116461057	6	116410607	116461024	50418	2	11689	ENSMUST00000203722.2	0	ENSMUSG00000025701	arachidonate 5-lipoxygenase
Slc4a5	3.19274	1.16454	0.0248489	0.384107	Promoter (<=1kb)	83235841	83236240	6	83237190	83261453	24264	1	232156	ENSMUST00000122897.1	-950	ENSMUSG00000068323	solute carrier family 4, sodium bicarbonate cotransporter, member 5
Mir149	2.14022	1.85769	0.0249415	0.384956	Promoter (1-2kb)	92848135	92848534	1	92850378	92850443	66	1	387167	ENSMUST00000083536.1	-1844	ENSMUSG00000065470	microRNA 149
Ostm1	5.77566	0.551747	0.025026	0.385679	Intron (ENSMUST00000105497.7/14628, intron 2 of 5)	42633832	42634231	10	42678916	42702459	23544	1	14628	ENSMUST00000040718.5	-44685	ENSMUSG00000038280	osteopetrosis associated transmembrane protein 1
Usp51	1.97991	2.34745	0.0251323	0.386736	Distal Intergenic	153012111	153012510	20	153006469	153009416	2948	1	635253	ENSMUST00000095755.3	5642	ENSMUSG00000067215	ubiquitin specific protease 51
Spire1	3.2896	-1.63109	0.025182	0.386917	Intron (ENSMUST00000045105.12/68166, intron 2 of 14)	67534932	67535331	18	67490990	67549252	58263	2	68166	ENSMUST00000224799.1	13921	ENSMUSG00000024533	spire type actin nucleation factor 1
Scml2	0	4.49026	0.0252816	0.387867	Intron (ENSMUST00000238603.1/107815, intron 5 of 11)	161152386	161152785	20	161162750	161256952	94203	1	107815	ENSMUST00000074802.11	-9965	ENSMUSG00000000037	Scm polycomb group protein like 2
Tafa4	5.69045	-0.710704	0.0254109	0.389266	Promoter (<=1kb)	97059886	97060285	6	96831203	97060413	229211	2	320701	ENSMUST00000089295.5	128	ENSMUSG00000046500	TAFA chemokine like family member 4
Cacna2d2	5.00346	-0.806184	0.0255091	0.39013	Promoter (1-2kb)	107401146	107401545	9	107400069	107529343	129275	1	56808	ENSMUST00000170737.2	1077	ENSMUSG00000010066	calcium channel, voltage-dependent, alpha 2/delta subunit 2
Gipc2	4.64601	-0.737877	0.0255435	0.39013	Promoter (<=1kb)	152165748	152166147	3	152130434	152165750	35317	2	54120	ENSMUST00000133102.1	0	ENSMUSG00000039131	GIPC PDZ domain containing family, member 2
Col4a5	0.501525	3.54409	0.0256239	0.390324	Intron (ENSMUST00000112931.7/12830, intron 50 of 52)	141683814	141684213	20	141658350	141675732	17383	1	12830	ENSMUST00000128669.1	25464	ENSMUSG00000031274	collagen, type IV, alpha 5
Klhl34	3.49587	1.90231	0.0256325	0.390324	Promoter (1-2kb)	157819812	157820211	20	157818435	157820369	1935	1	245683	ENSMUST00000087157.4	1377	ENSMUSG00000047485	kelch-like 34
Pak3	0	4.64815	0.0257356	0.390794	Intron (ENSMUST00000033640.13/18481, intron 1 of 15)	143651995	143652394	20	143664290	143797792	133503	1	18481	ENSMUST00000112868.7	-11896	ENSMUSG00000031284	p21 (RAC1) activated kinase 3
Zfp385a	3.70752	1.01922	0.0258034	0.390794	Promoter (<=1kb)	103323389	103323788	15	103313908	103323510	9603	2	29813	ENSMUST00000229551.1	0	ENSMUSG00000000552	zinc finger protein 385A
C1d	3.62895	-1.07936	0.0258205	0.390794	Distal Intergenic	17462707	17463106	11	17263621	17266560	2940	1	57316	ENSMUST00000130330.1	199086	ENSMUSG00000000581	C1D nuclear receptor co-repressor
Kcng2	6.83101	-0.518086	0.0258682	0.390794	Promoter (<=1kb)	80363404	80363803	18	80322944	80363650	40707	2	240444	ENSMUST00000184366.1	0	ENSMUSG00000059852	potassium voltage-gated channel, subfamily G, member 2
Ttc8	3.00277	1.27084	0.0259066	0.390794	Intron (ENSMUST00000220675.1/ENSMUST00000220675.1, intron 1 of 1)	99036454	99036853	12	98974498	98979885	5388	1	76260	ENSMUST00000139298.1	61956	ENSMUSG00000021013	tetratricopeptide repeat domain 8
Nfe2l1	5.0659	0.665331	0.0259224	0.390794	Promoter (<=1kb)	96829970	96830369	11	96817414	96829968	12555	2	18023	ENSMUST00000081775.11	-2	ENSMUSG00000038615	nuclear factor, erythroid derived 2,-like 1
Xlr	4.47979	-0.774361	0.0260083	0.390794	Exon (ENSMUST00000152691.1/ENSMUST00000152691.1, exon 1 of 2)	53974971	53975370	20	53777118	53797706	20589	2	22441	ENSMUST00000067782.7	-177265	ENSMUSG00000054626	X-linked lymphocyte-regulated
Disc1	6.67101	-0.583059	0.0260609	0.390794	Promoter (<=1kb)	125054401	125054800	8	125054230	125261148	206919	1	244667	ENSMUST00000121953.1	171	ENSMUSG00000043051	disrupted in schizophrenia 1
Myh9	3.10315	1.1743	0.026076	0.390794	Promoter (<=1kb)	77842080	77842479	15	77760587	77842175	81589	2	17886	ENSMUST00000016771.12	0	ENSMUSG00000022443	myosin, heavy polypeptide 9, non-muscle
Rai2	1.82675	2.71821	0.0261256	0.390794	Distal Intergenic	161678311	161678710	20	161717069	161779494	62426	1	24004	ENSMUST00000112338.1	-38359	ENSMUSG00000043518	retinoic acid induced 2
Rubie	3.94066	-0.996438	0.0261668	0.390794	Promoter (<=1kb)	46637388	46637787	14	46528680	46637408	108729	2	100873094	ENSMUST00000228663.1	0	ENSMUSG00000085123	RNA upstream of Bmp4 expressed in inner ear
Myl3	6.09299	-0.552078	0.0262555	0.390794	Exon (ENSMUST00000198865.4/19228, exon 9 of 16)	110727011	110727410	9	110741861	110769147	27287	1	17897	ENSMUST00000200011.4	-14451	ENSMUSG00000059741	myosin, light polypeptide 3
Ebf1	1.30672	-4.85643	0.0262674	0.390794	Intron (ENSMUST00000109268.1/13591, intron 11 of 15)	44982041	44982440	11	44912138	44972914	60777	1	13591	ENSMUST00000140822.1	69903	ENSMUSG00000057098	early B cell factor 1
Sema3f	5.49518	-0.629919	0.0263001	0.390794	Promoter (<=1kb)	107708318	107708717	9	107688326	107709479	21154	2	20350	ENSMUST00000193108.5	762	ENSMUSG00000034684	sema domain, immunoglobulin domain (Ig), short basic domain, secreted, (semaphorin) 3F
Armc2	1.1899	-4.75045	0.0263143	0.390794	Distal Intergenic	42097321	42097720	10	41916807	42018442	101636	2	213402	ENSMUST00000161927.7	-78879	ENSMUSG00000071324	armadillo repeat containing 2
Mecom	1.1899	-4.75045	0.0263143	0.390794	Intron (ENSMUST00000173495.7/14013, intron 1 of 15)	30213353	30213752	3	29952567	30238162	285596	2	14013	ENSMUST00000173059.7	24410	ENSMUSG00000027684	MDS1 and EVI1 complex locus
Eif2s3x	2.00769	2.62507	0.0263192	0.390794	Promoter (<=1kb)	94213064	94213463	20	94202880	94212862	9983	2	26905	ENSMUST00000127963.1	-202	ENSMUSG00000035150	eukaryotic translation initiation factor 2, subunit 3, structural gene X-linked
Tmem132d	6.54916	-0.618008	0.0264393	0.390794	Promoter (<=1kb)	128431983	128432382	5	127781630	128433077	651448	2	243274	ENSMUST00000044441.7	695	ENSMUSG00000034310	transmembrane protein 132D
Tex13b	2.61528	2.29196	0.0264564	0.390794	Distal Intergenic	140839550	140839949	20	140808307	140813433	5127	2	83555	ENSMUST00000044179.7	-26117	ENSMUSG00000042386	testis expressed 13B
Zbtb40	2.77618	-2.33424	0.0265083	0.390794	Promoter (2-3kb)	137051407	137051806	4	137014478	137048801	34324	2	230848	ENSMUST00000145505.1	-2606	ENSMUSG00000060862	zinc finger and BTB domain containing 40
Lef1	3.3542	-1.25982	0.0265086	0.390794	Intron (ENSMUST00000196438.2/ENSMUST00000196438.2, intron 1 of 2)	130923623	130924022	3	131110471	131224356	113886	1	16842	ENSMUST00000029611.13	-186449	ENSMUSG00000027985	lymphoid enhancer binding factor 1
Sall4	6.30129	-0.519266	0.0265289	0.390794	Promoter (<=1kb)	168765774	168766173	2	168756181	168765246	9066	2	99377	ENSMUST00000137536.1	-528	ENSMUSG00000027547	spalt like transcription factor 4
Gpm6b	0.535754	3.58245	0.0265792	0.390794	Promoter (2-3kb)	166235551	166235950	20	166238911	166388988	150078	1	14758	ENSMUST00000112235.7	-2961	ENSMUSG00000031342	glycoprotein m6b
Gm12830	5.04899	0.724485	0.02658	0.390794	Distal Intergenic	114731371	114731770	4	114821722	114856166	34445	1	433746	ENSMUST00000137570.1	-89952	ENSMUSG00000055198	predicted gene 12830
Kif19a	3.41701	0.982287	0.02667	0.391556	Promoter (1-2kb)	114789332	114789731	11	114787945	114789332	1388	1	286942	ENSMUST00000134165.1	1387	ENSMUSG00000010021	kinesin family member 19A
Mid1	2.45224	2.29124	0.02681	0.392052	Distal Intergenic	169549275	169549674	20	169685199	169990795	305597	1	17318	ENSMUST00000112107.7	-135525	ENSMUSG00000035299	midline 1
4933400A11Rik	3.88656	2.09918	0.0268301	0.392052	Intron (ENSMUST00000112107.7/17318, intron 1 of 9)	169773490	169773889	20	169776425	169779557	3133	2	66747	ENSMUST00000112102.1	5668	ENSMUSG00000055357	capping protein (actin filament) muscle Z-line, alpha 1 pseudogene
Tnfrsf1a	4.00922	-1.06076	0.02687	0.392052	Promoter (<=1kb)	125349836	125350235	6	125349723	125362484	12762	1	21937	ENSMUST00000032491.14	113	ENSMUSG00000030341	tumor necrosis factor receptor superfamily, member 1a
Map3k20	1.22074	-4.7727	0.0269229	0.392052	Promoter (<=1kb)	72286352	72286751	2	72285794	72364843	79050	1	65964	ENSMUST00000135204.1	558	ENSMUSG00000004085	mitogen-activated protein kinase kinase kinase 20
Pde11a	3.89983	-0.943391	0.0269375	0.392052	Promoter (<=1kb)	76338575	76338974	2	75989912	76338774	348863	2	241489	ENSMUST00000099992.9	0	ENSMUSG00000075270	phosphodiesterase 11A
Prps2	2.46515	2.48	0.0269464	0.392052	Intron (ENSMUST00000026839.4/110639, intron 4 of 6)	167360604	167361003	20	167372409	167382710	10302	2	110639	ENSMUST00000145456.1	21707	ENSMUSG00000025742	phosphoribosyl pyrophosphate synthetase 2
Taf7l	0	4.25529	0.0270103	0.392052	Exon (ENSMUST00000153424.7/13497, exon 23 of 23)	134453448	134453847	20	134469874	134474988	5115	2	74469	ENSMUST00000131311.1	21141	ENSMUSG00000009596	TATA-box binding protein associated factor 7 like
Prps2	0	4.25529	0.0270103	0.392052	Distal Intergenic	167395878	167396277	20	167346322	167382749	36428	2	110639	ENSMUST00000026839.4	-13129	ENSMUSG00000025742	phosphoribosyl pyrophosphate synthetase 2
Cnksr1	5.22421	-0.65459	0.0271024	0.392803	Promoter (<=1kb)	134238197	134238596	4	134228041	134238399	10359	2	194231	ENSMUST00000030645.8	0	ENSMUSG00000028841	connector enhancer of kinase suppressor of Ras 1
Dab1	6.2153	-0.551318	0.027172	0.392803	Promoter (<=1kb)	103619686	103620085	4	103619665	104680382	1060718	1	13131	ENSMUST00000106827.7	21	ENSMUSG00000028519	disabled 1
Map3k15	2.23739	2.64946	0.0271772	0.392803	Intron (ENSMUST00000112456.8/58194, intron 16 of 17)	159966685	159967084	20	159988433	160123351	134919	1	270672	ENSMUST00000033665.8	-21349	ENSMUSG00000031303	mitogen-activated protein kinase kinase kinase 15
Nhs	0.379503	3.40648	0.0272189	0.392851	Intron (ENSMUST00000087085.9/195727, intron 1 of 8)	162145415	162145814	20	161836815	162159388	322574	2	195727	ENSMUST00000081569.6	13574	ENSMUSG00000059493	NHS actin remodeling regulator
Fa2h	5.75246	-0.583118	0.0274112	0.39478	Promoter (<=1kb)	111393290	111393689	8	111347470	111393818	46349	2	338521	ENSMUST00000162463.1	129	ENSMUSG00000033579	fatty acid 2-hydroxylase
Prr36	3.36388	1.02161	0.0274873	0.39478	Promoter (<=1kb)	4217088	4217487	8	4209543	4217312	7770	2	73072	ENSMUST00000168386.8	0	ENSMUSG00000064125	proline rich 36
8030474K03Rik	2.57008	2.07524	0.0275129	0.39478	Distal Intergenic	101802372	101802771	20	101794686	101798640	3955	1	382231	ENSMUST00000149761.1	7686	ENSMUSG00000046774	RIKEN cDNA 8030474K03 gene
Anxa2	5.06909	-0.686716	0.0275405	0.39478	Promoter (<=1kb)	69453501	69453900	9	69453620	69491795	38176	1	12306	ENSMUST00000034756.14	0	ENSMUSG00000032231	annexin A2
Igfbpl1	3.65628	0.927094	0.02755	0.39478	Promoter (<=1kb)	45825611	45826010	4	45809468	45826923	17456	2	75426	ENSMUST00000044297.6	913	ENSMUSG00000035551	insulin-like growth factor binding protein-like 1
Cacna1i	6.23006	-0.603574	0.0275841	0.39478	Promoter (<=1kb)	80288080	80288479	15	80287534	80395747	108214	1	239556	ENSMUST00000162155.7	546	ENSMUSG00000022416	calcium channel, voltage-dependent, alpha 1I subunit
Gabrd	6.90396	-0.447703	0.0277283	0.39629	Promoter (<=1kb)	155397686	155398085	4	155384980	155398047	13068	2	14403	ENSMUST00000150423.7	0	ENSMUSG00000029054	gamma-aminobutyric acid (GABA) A receptor, subunit delta
Acsl4	1.94101	2.29137	0.0279111	0.3979	Distal Intergenic	142449134	142449533	20	142317993	142390535	72543	2	50790	ENSMUST00000033634.4	-58599	ENSMUSG00000031278	acyl-CoA synthetase long-chain family member 4
Slc45a1	1.84177	2.14987	0.0280172	0.3979	Distal Intergenic	150729018	150729417	4	150628572	150652174	23603	2	242773	ENSMUST00000037827.9	-76844	ENSMUSG00000039838	solute carrier family 45, member 1
Marchf5	5.06326	-0.81244	0.0280187	0.3979	Distal Intergenic	37233690	37234089	19	37217190	37221977	4788	1	69104	ENSMUST00000128530.1	16500	ENSMUSG00000023307	membrane associated ring-CH-type finger 5
Grik3	2.52507	1.73379	0.0280309	0.3979	Distal Intergenic	125440558	125440957	4	125490700	125714173	223474	1	14807	ENSMUST00000030676.7	-49743	ENSMUSG00000001985	glutamate receptor, ionotropic, kainate 3
Ppef1	1.82128	2.71046	0.028136	0.3979	Intron (ENSMUST00000071204.11/237178, intron 1 of 15)	160702439	160702838	20	160693571	160719936	26366	2	237178	ENSMUST00000136888.1	17098	ENSMUSG00000062168	protein phosphatase with EF hand calcium-binding domain 1
Rbm15	3.76957	-1.00548	0.0281489	0.3979	Promoter (<=1kb)	107333355	107333754	3	107325421	107333673	8253	2	229700	ENSMUST00000061772.10	0	ENSMUSG00000048109	RNA binding motif protein 15
Armcx2	2.71394	2.25801	0.0281557	0.3979	Distal Intergenic	134815695	134816094	20	134804147	134809221	5075	2	67416	ENSMUST00000168264.1	-6474	ENSMUSG00000033436	armadillo repeat containing, X-linked 2
Gm9748	7.24028	-0.460924	0.0281956	0.3979	Promoter (<=1kb)	79769509	79769908	14	79769908	79772743	2836	1	102633266	ENSMUST00000194881.1	0	ENSMUSG00000102774	predicted gene 9748
Stard8	2.52113	2.34978	0.0282099	0.3979	Distal Intergenic	99092804	99093203	20	99068608	99070444	1837	1	236920	ENSMUST00000127361.1	24196	ENSMUSG00000031216	START domain containing 8
Olig2	3.83675	-0.96744	0.0282298	0.3979	Distal Intergenic	91211837	91212236	16	91225457	91228677	3221	1	50913	ENSMUST00000035608.9	-13221	ENSMUSG00000039830	oligodendrocyte transcription factor 2
Scml2	1.80108	2.68355	0.0283059	0.397969	Distal Intergenic	161435091	161435490	20	161246257	161258196	11940	1	107815	ENSMUST00000238361.1	188834	ENSMUSG00000000037	Scm polycomb group protein like 2
C87198	2.58789	1.62582	0.028374	0.397969	Promoter (2-3kb)	56593235	56593634	12	56591069	56594532	3464	1	97836	ENSMUST00000182261.1	2166	ENSMUSG00000092515	expressed sequence C87198
Tex13a	2.30852	2.49024	0.0283908	0.397969	Intron (ENSMUST00000113063.7/60367, intron 2 of 10)	138022644	138023043	20	138208165	138209580	1416	2	67944	ENSMUST00000096314.2	186537	ENSMUSG00000071686	testis expressed 13A
Mir672	1.74336	3.00306	0.0284303	0.397969	Intron (ENSMUST00000118314.7/245555, intron 1 of 2)	104153240	104153639	20	104116175	104116274	100	2	751535	ENSMUST00000102331.1	-36966	ENSMUSG00000076286	microRNA 672
Unc5b	3.08978	-1.64864	0.028459	0.397969	Exon (ENSMUST00000218180.1/ENSMUST00000218180.1, exon 1 of 1)	60811519	60811918	10	60762610	60820641	58032	2	107449	ENSMUST00000218316.1	8723	ENSMUSG00000020099	unc-5 netrin receptor B
Slc6a17	5.69254	-0.597141	0.028468	0.397969	Promoter (<=1kb)	107517639	107518038	3	107467543	107518018	50476	2	229706	ENSMUST00000169449.7	0	ENSMUSG00000027894	solute carrier family 6 (neurotransmitter transporter), member 17
Gm12866	3.51015	-1.39042	0.0285357	0.398091	Promoter (3-4kb)	119072329	119072728	4	119054790	119069111	14322	2	433751	ENSMUST00000128998.1	-3218	ENSMUSG00000066060	predicted gene 12866
Cpeb1	7.49255	-0.423614	0.0285546	0.398091	Promoter (<=1kb)	81453316	81453715	7	81348280	81454675	106396	2	12877	ENSMUST00000178892.2	960	ENSMUSG00000025586	cytoplasmic polyadenylation element binding protein 1
Cdk18	4.87132	-0.804874	0.0288121	0.401	Promoter (<=1kb)	132138714	132139113	1	132114764	132139605	24842	2	18557	ENSMUST00000112362.2	492	ENSMUSG00000026437	cyclin-dependent kinase 18
Acot11	3.73478	-1.08168	0.0289182	0.401	Distal Intergenic	106827601	106828000	4	106747235	106804998	57764	2	329910	ENSMUST00000065253.12	-22603	ENSMUSG00000034853	acyl-CoA thioesterase 11
Zfp704	4.14176	-0.906021	0.0289188	0.401	Intron (ENSMUST00000041124.12/170753, intron 2 of 8)	9512414	9512813	3	9438292	9565299	127008	2	170753	ENSMUST00000193947.1	52486	ENSMUSG00000040209	zinc finger protein 704
9530026P05Rik	7.33945	-0.462591	0.0289831	0.401	Promoter (<=1kb)	92941557	92941956	6	92940582	93272977	332396	1	330385	ENSMUST00000204609.1	975	ENSMUSG00000097462	RIKEN cDNA 9530026P05 gene
Acsl4	2.95133	2.06696	0.0290065	0.401	Distal Intergenic	142483599	142483998	20	142317993	142390535	72543	2	50790	ENSMUST00000033634.4	-93064	ENSMUSG00000031278	acyl-CoA synthetase long-chain family member 4
Cryzl2	3.04035	-1.57624	0.0291058	0.401	Distal Intergenic	157449539	157449938	1	157458577	157488628	30052	1	226527	ENSMUST00000193791.5	-8639	ENSMUSG00000033488	crystallin zeta like 2
Nhsl2	2.71616	2.26133	0.0291104	0.401	Intron (ENSMUST00000125115.1/100042480, intron 1 of 1)	101889818	101890217	20	101849385	102092055	242671	1	100042480	ENSMUST00000101339.7	40433	ENSMUSG00000079481	NHS-like 2
Rhbdl3	3.45392	1.00218	0.0291494	0.401	Promoter (<=1kb)	80301064	80301463	11	80300912	80355955	55044	1	246104	ENSMUST00000017836.7	152	ENSMUSG00000017692	rhomboid like 3
Ngfr	7.5521	-0.506005	0.0291501	0.401	Promoter (2-3kb)	95585144	95585543	11	95568818	95587735	18918	2	18053	ENSMUST00000000122.6	2192	ENSMUSG00000000120	nerve growth factor receptor (TNFR superfamily, member 16)
Gpm6b	0.932194	3.11122	0.0292107	0.401	Distal Intergenic	166216202	166216601	20	166238911	166388988	150078	1	14758	ENSMUST00000112235.7	-22310	ENSMUSG00000031342	glycoprotein m6b
Phka1	2.94548	2.13407	0.0292427	0.401	Intron (ENSMUST00000043596.11/18679, intron 4 of 31)	102628378	102628777	20	102513975	102644246	130272	2	18679	ENSMUST00000043596.11	15469	ENSMUSG00000034055	phosphorylase kinase alpha 1
Tnfaip8l3	4.56909	-0.769799	0.0292581	0.401	Promoter (<=1kb)	54067769	54068168	9	54067355	54068372	1018	2	244882	ENSMUST00000214656.1	204	ENSMUSG00000074345	tumor necrosis factor, alpha-induced protein 8-like 3
Magee2	4.28492	1.84496	0.0293569	0.401	Promoter (<=1kb)	104856839	104857238	20	104854952	104857267	2316	2	272790	ENSMUST00000033575.6	29	ENSMUSG00000031224	MAGE family member E2
A230072E10Rik	1.77414	2.36791	0.0293673	0.401	Intron (ENSMUST00000073364.5/207375, intron 4 of 15)	151428063	151428462	20	151291974	151344846	52873	2	331547	ENSMUST00000175942.7	-83217	ENSMUSG00000084771	RIKEN cDNA A230072E10 gene
Gm1720	2.93273	2.11421	0.0294072	0.401	Distal Intergenic	166808351	166808750	20	166662025	166689812	27788	1	382255	ENSMUST00000135086.1	146326	ENSMUSG00000086860	predicted gene 1720
A4galt	3.43806	-1.18826	0.0294109	0.401	Distal Intergenic	83271195	83271594	15	83226722	83251774	25053	2	239559	ENSMUST00000049530.13	-19421	ENSMUSG00000047878	alpha 1,4-galactosyltransferase
Cachd1	5.37317	-0.680446	0.0294514	0.401	Promoter (2-3kb)	100779177	100779576	4	100776675	101029220	252546	1	320508	ENSMUST00000097955.2	2502	ENSMUSG00000028532	cache domain containing 1
2810459M11Rik	6.73347	-0.560161	0.0294685	0.401	Promoter (<=1kb)	86046535	86046934	1	86045863	86055456	9594	1	72792	ENSMUST00000165824.2	672	ENSMUSG00000026227	RIKEN cDNA 2810459M11 gene
Rbfox3	2.22366	-2.3425	0.0295932	0.402	Intron (ENSMUST00000117731.7/52897, intron 3 of 13)	118584987	118585386	11	118502842	118569910	67069	2	52897	ENSMUST00000136551.2	-15077	ENSMUSG00000025576	RNA binding protein, fox-1 homolog (C. elegans) 3
Fkrp	4.22521	-0.776745	0.0296206	0.402	Promoter (3-4kb)	16811257	16811656	7	16811612	16815521	3910	2	243853	ENSMUST00000206259.1	3865	ENSMUSG00000048920	fukutin related protein
Arhgap8	6.0632	-0.623395	0.02973	0.402693	Promoter (<=1kb)	84719791	84720190	15	84720052	84772207	52156	1	73167	ENSMUST00000006029.10	0	ENSMUSG00000078954	Rho GTPase activating protein 8
Dusp15	6.76094	-0.497477	0.029787	0.402693	Exon (ENSMUST00000123121.8/252864, exon 7 of 7)	152943376	152943775	2	152940997	152951456	10460	2	252864	ENSMUST00000123121.8	7681	ENSMUSG00000042662	dual specificity phosphatase-like 15
Tyw3	2.9059	-1.65814	0.0297898	0.402693	Distal Intergenic	154570941	154571340	3	154579845	154594534	14690	2	209584	ENSMUST00000148680.2	23194	ENSMUSG00000047583	tRNA-yW synthesizing protein 3 homolog (S. cerevisiae)
Col25a1	2.14291	-3.09872	0.0298394	0.402832	Intron (ENSMUST00000143830.2/77018, intron 2 of 19)	130339904	130340303	3	130181484	130595102	413619	1	77018	ENSMUST00000238846.1	158420	ENSMUSG00000058897	collagen, type XXV, alpha 1
Ptprm	5.19166	-0.650303	0.0299534	0.403638	Promoter (<=1kb)	67353222	67353621	17	66666947	67354073	687127	2	19274	ENSMUST00000037974.9	452	ENSMUSG00000033278	protein tyrosine phosphatase, receptor type, M
Itih5l-ps	1.80572	2.68973	0.029978	0.403638	Promoter (<=1kb)	150826983	150827382	20	150826972	150856940	29969	1	634882	ENSMUST00000145639.7	11	ENSMUSG00000087149	inter-alpha (globulin) inhibitor H5-like, pseudogene
Lrrk1	4.74564	-0.722087	0.0300878	0.404584	Promoter (<=1kb)	66387961	66388360	7	66258745	66388350	129606	2	233328	ENSMUST00000015277.13	0	ENSMUSG00000015133	leucine-rich repeat kinase 1
Egfr	6.27971	-0.586026	0.0301519	0.404805	Promoter (<=1kb)	16752688	16753087	11	16752230	16793744	41515	1	13649	ENSMUST00000139722.1	458	ENSMUSG00000020122	epidermal growth factor receptor
Psd2	3.19779	1.16041	0.0301833	0.404805	Promoter (<=1kb)	35964403	35964802	18	35964830	36014712	49883	1	74002	ENSMUST00000115716.8	-28	ENSMUSG00000024347	pleckstrin and Sec7 domain containing 2
Pygo1	2.36746	-2.42847	0.0303916	0.406488	Promoter (<=1kb)	72925074	72925473	9	72925645	72952181	26537	1	72135	ENSMUST00000038489.5	-172	ENSMUSG00000034910	pygopus 1
2200002D01Rik	4.0931	-0.95069	0.0303929	0.406488	Promoter (<=1kb)	29247961	29248360	7	29247572	29248338	767	2	72275	ENSMUST00000151339.1	0	ENSMUSG00000030587	RIKEN cDNA 2200002D01 gene
Gsg1l	6.88169	-0.446492	0.030428	0.406488	Promoter (<=1kb)	126081016	126081415	7	125878420	126082411	203992	2	269994	ENSMUST00000073935.6	996	ENSMUSG00000046182	GSG1-like
Acsl4	1.00122	3.19438	0.0305782	0.407753	Exon (ENSMUST00000121341.1/ENSMUST00000121341.1, exon 1 of 1)	142424944	142425343	20	142317993	142390535	72543	2	50790	ENSMUST00000033634.4	-34409	ENSMUSG00000031278	acyl-CoA synthetase long-chain family member 4
Hyls1	4.01412	-0.87558	0.0306078	0.407753	Promoter (3-4kb)	35574160	35574559	9	35560820	35570398	9579	2	76832	ENSMUST00000115110.4	-3762	ENSMUSG00000050555	HYLS1, centriolar and ciliogenesis associated
Ap3b1	1.81148	2.06374	0.0306422	0.407753	Distal Intergenic	94654156	94654555	13	94542303	94547867	5565	1	11774	ENSMUST00000220505.1	111853	ENSMUSG00000021686	adaptor-related protein complex 3, beta 1 subunit
4930519F16Rik	3.41955	1.93973	0.0307459	0.407906	Exon (ENSMUST00000033688.11/75106, exon 5 of 6)	103230174	103230573	20	103230094	103253047	22954	2	75106	ENSMUST00000182224.7	22474	ENSMUSG00000031325	RIKEN cDNA 4930519F16 gene
Arid1b	5.07688	-0.710896	0.0308172	0.407906	Exon (ENSMUST00000232522.1/ENSMUST00000232522.1, exon 1 of 2)	4946321	4946720	17	4994332	5097733	103402	1	239985	ENSMUST00000124362.1	-47612	ENSMUSG00000069729	AT rich interactive domain 1B (SWI-like)
Gadd45g	6.25948	0.543287	0.0309065	0.407906	Promoter (4-5kb)	51841600	51841999	13	51846678	51848468	1791	1	23882	ENSMUST00000021903.2	-4679	ENSMUSG00000021453	growth arrest and DNA-damage-inducible 45 gamma
Rhod	4.41819	-0.774724	0.0309552	0.407906	Promoter (<=1kb)	4439206	4439605	19	4425459	4439432	13974	2	11854	ENSMUST00000048197.9	0	ENSMUSG00000041845	ras homolog family member D
Cdca7	3.62348	1.20759	0.0310228	0.407906	Intron (ENSMUST00000090824.11/65964, intron 16 of 19)	72424905	72425304	2	72476159	72486893	10735	1	66953	ENSMUST00000102691.10	-50855	ENSMUSG00000055612	cell division cycle associated 7
Des	6.76304	-0.566711	0.031023	0.407906	Promoter (<=1kb)	75360240	75360639	1	75360329	75368579	8251	1	13346	ENSMUST00000027409.9	0	ENSMUSG00000026208	desmin
Bdkrb2	5.42212	-0.606736	0.0310367	0.407906	Promoter (<=1kb)	105562892	105563291	12	105563226	105595237	32012	1	12062	ENSMUST00000001652.6	0	ENSMUSG00000021070	bradykinin receptor, beta 2
Marveld3	2.82779	-1.61051	0.0310482	0.407906	Exon (ENSMUST00000001722.13/73608, exon 3 of 3)	109947710	109948109	8	109959625	109962053	2429	2	73608	ENSMUST00000155052.1	13944	ENSMUSG00000001672	MARVEL (membrane-associating) domain containing 3
Draxin	3.56347	0.997345	0.0310541	0.407906	Promoter (<=1kb)	148129804	148130203	4	148098437	148130698	32262	2	70433	ENSMUST00000030862.4	495	ENSMUSG00000029005	dorsal inhibitory axon guidance protein
Pir	1.0352	3.23513	0.0310942	0.407906	Intron (ENSMUST00000145412.7/69656, intron 3 of 8)	164283896	164284295	20	164269573	164309777	40205	1	69656	ENSMUST00000123343.1	14323	ENSMUSG00000031379	pirin
Rai2	2.31855	2.50553	0.0311502	0.407906	Distal Intergenic	161607657	161608056	20	161717069	161779494	62426	1	24004	ENSMUST00000112338.1	-109013	ENSMUSG00000043518	retinoic acid induced 2
Rassf8	1.99621	-3.02306	0.031213	0.407906	Promoter (<=1kb)	145747150	145747549	6	145746748	145821079	74332	1	71323	ENSMUST00000111704.7	402	ENSMUSG00000030259	Ras association (RalGDS/AF-6) domain family (N-terminal) member 8
Smoc2	7.21323	0.396576	0.0312348	0.407906	Promoter (<=1kb)	14279241	14279640	17	14279506	14404790	125285	1	64074	ENSMUST00000024660.8	0	ENSMUSG00000023886	SPARC related modular calcium binding 2
Tsc22d3	3.4216	1.9432	0.0312627	0.407906	Distal Intergenic	140624849	140625248	20	140540262	140600659	60398	2	14605	ENSMUST00000112996.8	-24190	ENSMUSG00000031431	TSC22 domain family, member 3
Nrxn1	1.9729	2.08077	0.0312774	0.407906	Promoter (1-2kb)	90702172	90702571	17	90590194	90700774	110581	2	18189	ENSMUST00000197224.1	-1398	ENSMUSG00000024109	neurexin I
Sema6d	1.10485	-4.66955	0.0313073	0.407906	Promoter (<=1kb)	124611259	124611658	2	124610601	124665957	55357	1	214968	ENSMUST00000103240.8	658	ENSMUSG00000027200	sema domain, transmembrane domain (TM), and cytoplasmic domain, (semaphorin) 6D
Acp1	2.65266	-1.75862	0.0313314	0.407906	Promoter (<=1kb)	30911549	30911948	12	30893326	30911571	18246	2	11431	ENSMUST00000062740.14	0	ENSMUSG00000044573	acid phosphatase 1, soluble
Phf24	3.01846	-1.83683	0.0314956	0.409267	Distal Intergenic	42896866	42897265	4	42916660	42937900	21241	1	230085	ENSMUST00000151824.1	-19395	ENSMUSG00000036062	PHD finger protein 24
Myt1l	6.41903	0.625166	0.0315196	0.409267	Promoter (<=1kb)	29533123	29533522	12	29533385	29566998	33614	1	17933	ENSMUST00000219899.1	0	ENSMUSG00000061911	myelin transcription factor 1-like
Armcx2	0.368701	3.39424	0.0315559	0.409267	Distal Intergenic	134866244	134866643	20	134804147	134809221	5075	2	67416	ENSMUST00000168264.1	-57023	ENSMUSG00000033436	armadillo repeat containing, X-linked 2
Tbc1d8b	1.04165	2.69426	0.0317064	0.409838	Intron (ENSMUST00000096313.3/245638, intron 7 of 20)	139720955	139721354	20	139736172	139745243	9072	1	245638	ENSMUST00000123430.1	-14818	ENSMUSG00000042473	TBC1 domain family, member 8B
Grpr	2.20501	2.1499	0.0317872	0.409838	Distal Intergenic	163350940	163351339	20	163513904	163549677	35774	2	14829	ENSMUST00000033730.2	198338	ENSMUSG00000031364	gastrin releasing peptide receptor
4632428C04Rik	5.19249	-0.725068	0.0318344	0.409838	Exon (ENSMUST00000181485.2/100043102, exon 3 of 3)	30019773	30020172	16	30008667	30021430	12764	1	100043102	ENSMUST00000181485.2	11106	ENSMUSG00000097184	RIKEN cDNA 4632428C04 gene
Mir8104	4.0161	-0.850028	0.0318372	0.409838	Promoter (<=1kb)	122679095	122679494	10	122679315	122679415	101	1	102466884	ENSMUST00000185165.1	0	ENSMUSG00000099225	microRNA 8104
Slc26a4	7.96989	-0.437663	0.0318411	0.409838	Promoter (<=1kb)	31559085	31559484	12	31519827	31559969	40143	2	23985	ENSMUST00000001253.7	485	ENSMUSG00000020651	solute carrier family 26, member 4
Nrxn3	2.8676	1.39842	0.0318685	0.409838	Intron (ENSMUST00000190626.6/18191, intron 14 of 18)	90132497	90132896	12	89812483	90333443	520961	1	18191	ENSMUST00000110130.3	320014	ENSMUSG00000066392	neurexin III
Map3k15	2.31501	2.49933	0.031955	0.409838	Intron (ENSMUST00000033665.8/270672, intron 3 of 28)	160015645	160016044	20	159988433	160123351	134919	1	270672	ENSMUST00000033665.8	27212	ENSMUSG00000031303	mitogen-activated protein kinase kinase kinase 15
Mir325	2.12804	2.49716	0.0320049	0.409838	Intron (ENSMUST00000136406.7/100043213, intron 4 of 4)	105370969	105371368	20	105379082	105379179	98	2	723929	ENSMUST00000083491.1	7811	ENSMUSG00000065425	microRNA 325
Fignl2	0.960943	-4.52685	0.0320104	0.409838	Intron (ENSMUST00000213610.1/ENSMUST00000213610.1, intron 1 of 1)	101070463	101070862	15	101050194	101054399	4206	2	668225	ENSMUST00000178140.1	-16064	ENSMUSG00000095440	fidgetin-like 2
Fzd2	4.65307	0.751106	0.0320282	0.409838	Promoter (<=1kb)	102604966	102605365	11	102604396	102608058	3663	1	57265	ENSMUST00000057893.6	570	ENSMUSG00000050288	frizzled class receptor 2
Siah1b	2.39037	2.37281	0.0320557	0.409838	Promoter (4-5kb)	164080871	164081270	20	164071885	164076493	4609	2	20438	ENSMUST00000134272.1	-4378	ENSMUSG00000040749	siah E3 ubiquitin protein ligase 1B
Basp1	1.98728	-3.01451	0.0320806	0.409838	Intron (ENSMUST00000226199.1/ENSMUST00000226199.1, intron 4 of 4)	25287879	25288278	15	25364857	25413698	48842	2	70350	ENSMUST00000228597.1	125420	ENSMUSG00000045763	brain abundant, membrane attached signal protein 1
Kcns3	5.00105	-0.796597	0.0322105	0.410943	Promoter (<=1kb)	11149701	11150100	12	11090202	11150373	60172	2	238076	ENSMUST00000055673.1	273	ENSMUSG00000043673	potassium voltage-gated channel, delayed-rectifier, subfamily S, member 3
Gpc4	2.4129	1.6674	0.0322795	0.410943	Promoter (<=1kb)	52164682	52165081	20	52053021	52165252	112232	2	14735	ENSMUST00000033450.2	171	ENSMUSG00000031119	glypican 4
2900040C04Rik	2.79827	1.64074	0.0323108	0.410943	Distal Intergenic	76223716	76224115	14	76251457	76252327	871	1	72893	ENSMUST00000227933.1	-27342	ENSMUSG00000115625	RIKEN cDNA 2900040C04 gene
Fzd6	5.39559	-0.803555	0.0323992	0.410943	Promoter (<=1kb)	39006555	39006954	15	39006333	39038186	31854	1	14368	ENSMUST00000022906.7	222	ENSMUSG00000022297	frizzled class receptor 6
Arhgap40	5.45494	0.755076	0.0324242	0.410943	Distal Intergenic	158553849	158554248	2	158541737	158550762	9026	1	545481	ENSMUST00000135838.1	12112	ENSMUSG00000074625	Rho GTPase activating protein 40
Cadm4	2.90547	1.35667	0.0324971	0.410943	Promoter (<=1kb)	24499992	24500391	7	24499961	24502794	2834	1	260299	ENSMUST00000205820.1	31	ENSMUSG00000054793	cell adhesion molecule 4
Ascl1	4.54096	0.851712	0.0325515	0.410943	Promoter (<=1kb)	87494574	87494973	10	87490819	87493660	2842	2	17172	ENSMUST00000020243.9	-914	ENSMUSG00000020052	achaete-scute family bHLH transcription factor 1
Thbs1	2.97989	-1.81476	0.0325938	0.410943	Promoter (<=1kb)	118112160	118112559	2	118111876	118127133	15258	1	21825	ENSMUST00000039559.8	284	ENSMUSG00000040152	thrombospondin 1
Rlim	1.53592	2.73346	0.0326073	0.410943	Distal Intergenic	104000615	104001014	20	103977795	103981284	3490	2	19820	ENSMUST00000135101.1	-19331	ENSMUSG00000056537	ring finger protein, LIM domain interacting
Nap1l2	3.30705	1.96189	0.0327491	0.410943	Distal Intergenic	103155306	103155705	20	103184176	103186640	2465	2	17954	ENSMUST00000121720.1	30935	ENSMUSG00000082229	nucleosome assembly protein 1-like 2
Caln1	6.25805	-0.524873	0.0327542	0.410943	Promoter (<=1kb)	130448967	130449366	5	130448801	130847412	398612	1	140904	ENSMUST00000111288.3	166	ENSMUSG00000060371	calneuron 1
Frmpd4	2.17307	2.35094	0.0328108	0.410943	Promoter (<=1kb)	168449008	168449407	20	167473973	168448042	974070	2	333605	ENSMUST00000238709.1	-966	ENSMUSG00000049176	FERM and PDZ domain containing 4
Gm3985	2.22967	-2.35306	0.0328487	0.410943	Distal Intergenic	32966701	32967100	8	32888505	32950026	61522	2	100042715	ENSMUST00000132101.7	-16675	ENSMUSG00000079070	predicted gene 3985
Urm1	2.78021	1.37772	0.0328573	0.410943	Promoter (<=1kb)	29820221	29820620	2	29820075	29843145	23071	1	68205	ENSMUST00000149379.7	146	ENSMUSG00000069020	ubiquitin related modifier 1
Snx12	2.9118	2.08053	0.0328799	0.410943	Intron (ENSMUST00000156473.7/55988, intron 4 of 5)	101201775	101202174	20	101213487	101214539	1053	2	55988	ENSMUST00000130826.1	12365	ENSMUSG00000046032	sorting nexin 12
Fgf10	6.23646	-0.554704	0.0329297	0.410943	Promoter (<=1kb)	118715097	118715496	13	118714699	118792115	77417	1	14165	ENSMUST00000022246.8	398	ENSMUSG00000021732	fibroblast growth factor 10
Fras1	3.4199	-1.32398	0.0329768	0.410943	Intron (ENSMUST00000036019.4/231470, intron 22 of 73)	96638218	96638617	5	96630119	96636766	6648	1	231470	ENSMUST00000198016.1	8099	ENSMUSG00000034687	Fraser extracellular matrix complex subunit 1
Gli2	3.68918	-1.18175	0.0330301	0.410943	Distal Intergenic	119077545	119077944	1	118834132	119053619	219488	2	14633	ENSMUST00000062483.14	-23926	ENSMUSG00000048402	GLI-Kruppel family member GLI2
Apc2	2.34148	1.73277	0.0330423	0.410943	Promoter (2-3kb)	80304819	80305218	10	80301820	80318256	16437	1	23805	ENSMUST00000020349.6	2999	ENSMUSG00000020135	APC regulator of WNT signaling pathway 2
3632454L22Rik	3.2994	1.44618	0.0330438	0.410943	Promoter (<=1kb)	135035691	135036090	20	135022734	135036148	13415	2	320606	ENSMUST00000153610.7	58	ENSMUSG00000089759	RIKEN cDNA 3632454L22 gene
Sulf1	4.49911	0.653346	0.0331782	0.410943	Promoter (<=1kb)	12692162	12692561	1	12692277	12861192	168916	1	240725	ENSMUST00000177608.7	0	ENSMUSG00000016918	sulfatase 1
Hmga1	2.00588	-3.0154	0.0332543	0.410943	Promoter (2-3kb)	27554085	27554484	17	27556497	27562846	6350	1	15361	ENSMUST00000118599.8	-2013	ENSMUSG00000046711	high mobility group AT-hook 1
Nrk	2.11203	2.47476	0.0332623	0.410943	Intron (ENSMUST00000113063.7/60367, intron 6 of 10)	138735847	138736246	20	138914430	139009092	94663	1	27206	ENSMUST00000064937.13	-178184	ENSMUSG00000052854	Nik related kinase
Elf2	5.64344	-0.588768	0.0332797	0.410943	Distal Intergenic	51358742	51359141	3	51252720	51340663	87944	2	69257	ENSMUST00000194641.5	-18079	ENSMUSG00000037174	E74-like factor 2
Kifc3	4.99818	-0.707169	0.0333277	0.410943	Promoter (<=1kb)	95137729	95138128	8	95129196	95137922	8727	2	16582	ENSMUST00000212076.1	0	ENSMUSG00000031788	kinesin family member C3
Zfp385b	4.79063	-0.790847	0.0333574	0.410943	Promoter (<=1kb)	77816132	77816531	2	77411100	77816816	405717	2	241494	ENSMUST00000111831.7	285	ENSMUSG00000027016	zinc finger protein 385B
Paqr3	3.50634	0.999797	0.0333923	0.410943	Promoter (<=1kb)	97111562	97111961	5	97082329	97111596	29268	2	231474	ENSMUST00000069453.8	0	ENSMUSG00000055725	progestin and adipoQ receptor family member III
Gm6249	2.28204	-2.33652	0.0334136	0.410943	Distal Intergenic	136663192	136663591	7	136667955	136710604	42650	2	621677	ENSMUST00000211142.1	47013	ENSMUSG00000110101	predicted gene 6249
Phka1	1.5014	2.68787	0.0334293	0.410943	Distal Intergenic	102652931	102653330	20	102554779	102644246	89468	2	18679	ENSMUST00000142534.1	-8685	ENSMUSG00000034055	phosphorylase kinase alpha 1
Pak3	1.5014	2.68787	0.0334293	0.410943	Distal Intergenic	143494172	143494571	20	143518591	143797792	279202	1	18481	ENSMUST00000033640.13	-24020	ENSMUSG00000031284	p21 (RAC1) activated kinase 3
Kdm5c	6.19312	1.97156	0.0334412	0.410943	Exon (ENSMUST00000168786.7/245666, exon 5 of 15)	152209570	152209969	20	152233020	152273768	40749	1	20591	ENSMUST00000112584.7	-23051	ENSMUSG00000025332	lysine (K)-specific demethylase 5C
Ppp1r3d	5.60516	-0.618343	0.0334521	0.410943	Promoter (<=1kb)	178413351	178413750	2	178411206	178414472	3267	2	228966	ENSMUST00000058678.4	722	ENSMUSG00000049999	protein phosphatase 1, regulatory subunit 3D
Frmpd4	1.77875	2.65405	0.033641	0.412032	Intron (ENSMUST00000112147.8/333605, intron 3 of 19)	168271279	168271678	20	167475298	168124290	648993	2	333605	ENSMUST00000239138.1	-146989	ENSMUSG00000049176	FERM and PDZ domain containing 4
Rps4x	2.6358	1.99835	0.0336954	0.412032	Distal Intergenic	102180339	102180738	20	102185074	102186737	1664	2	20102	ENSMUST00000155028.1	5999	ENSMUSG00000031320	ribosomal protein S4, X-linked
Sgcd	4.12717	-0.878163	0.0337961	0.412032	Intron (ENSMUST00000109220.7/24052, intron 2 of 6)	47342396	47342795	11	46978785	47379522	400738	2	24052	ENSMUST00000077221.5	36727	ENSMUSG00000020354	sarcoglycan, delta (dystrophin-associated glycoprotein)
Prcd	1.1244	-4.68052	0.0338238	0.412032	Exon (ENSMUST00000021166.5/114886, exon 4 of 4)	116646014	116646413	11	116653534	116668092	14559	1	100038570	ENSMUST00000148484.8	-7121	ENSMUSG00000075410	photoreceptor disc component
Ephx4	5.35779	-0.756095	0.0338679	0.412032	Promoter (<=1kb)	107403684	107404083	5	107403775	107413528	9754	1	384214	ENSMUST00000161246.7	0	ENSMUSG00000033805	epoxide hydrolase 4
Fbxl16	3.35681	1.19239	0.0338897	0.412032	Promoter (<=1kb)	25809583	25809982	17	25809085	25821255	12171	1	214931	ENSMUST00000045692.8	498	ENSMUSG00000025738	F-box and leucine-rich repeat protein 16
Anxa11	6.38398	-0.523567	0.033914	0.412032	Promoter (<=1kb)	25842262	25842661	14	25842183	25886804	44622	1	11744	ENSMUST00000133547.1	79	ENSMUSG00000021866	annexin A11
D630033O11Rik	5.39587	-0.716145	0.0339305	0.412032	Promoter (<=1kb)	43270612	43271011	9	43270822	43280066	9245	1	235302	ENSMUST00000209461.1	0	ENSMUSG00000095385	RIKEN cDNA D630033O11 gene
Pcdh9	3.19363	-1.4845	0.0339392	0.412032	Distal Intergenic	92738830	92739229	14	93173729	93885748	712020	2	211712	ENSMUST00000194129.1	1146519	ENSMUSG00000055421	protocadherin 9
Rap2c	3.57964	-1.47497	0.0339465	0.412032	Distal Intergenic	51070271	51070670	20	51003912	51018018	14107	2	72065	ENSMUST00000053593.7	-52253	ENSMUSG00000050029	RAP2C, member of RAS oncogene family
Rai2	2.11051	2.47305	0.0339837	0.412032	Distal Intergenic	161616534	161616933	20	161717069	161779494	62426	1	24004	ENSMUST00000112338.1	-100136	ENSMUSG00000043518	retinoic acid induced 2
Mir6358	2.56955	1.60501	0.0340661	0.412542	Distal Intergenic	76161329	76161728	18	76170552	76170652	101	1	102465184	ENSMUST00000184549.1	-8824	ENSMUSG00000098276	microRNA 6358
Lvrn	4.92507	-0.687236	0.0341754	0.412875	Promoter (<=1kb)	46849944	46850343	18	46850038	46907242	57205	1	74574	ENSMUST00000025358.3	0	ENSMUSG00000024481	laeverin
Mir3472	1.93524	2.52546	0.034193	0.412875	Distal Intergenic	145162269	145162668	20	145039344	145039414	71	1	100499526	ENSMUST00000175176.1	122925	ENSMUSG00000092917	microRNA 3472
Rtl9	1.88613	2.27641	0.0342783	0.412875	Distal Intergenic	143066648	143067047	20	143099594	143104297	4704	1	209540	ENSMUST00000165829.2	-32547	ENSMUSG00000085584	retrotransposon Gag like 9
Pcdh17	4.90345	0.596512	0.0342965	0.412875	Promoter (1-2kb)	84447037	84447436	14	84448507	84479227	30721	1	219228	ENSMUST00000226362.1	-1071	ENSMUSG00000035566	protocadherin 17
Lmtk3	4.8307	0.70991	0.0343062	0.412875	Intron (ENSMUST00000209617.1/381983, intron 12 of 15)	45797706	45798105	7	45787748	45792586	4839	1	381983	ENSMUST00000211127.1	9958	ENSMUSG00000062044	lemur tyrosine kinase 3
Proser2	4.62506	-0.770745	0.0343718	0.412875	Promoter (<=1kb)	6129922	6130321	2	6097607	6130211	32605	2	227545	ENSMUST00000114942.8	0	ENSMUSG00000045319	proline and serine rich 2
Slc16a2	4.94732	1.78073	0.034376	0.412875	Distal Intergenic	103879307	103879706	20	103697414	103821983	124570	2	20502	ENSMUST00000042664.9	-57324	ENSMUSG00000033965	solute carrier family 16 (monocarboxylic acid transporters), member 2
Sh3kbp1	1.91276	2.4943	0.0345268	0.413595	Promoter (<=1kb)	159942423	159942822	20	159942693	159975917	33225	1	58194	ENSMUST00000128185.7	0	ENSMUSG00000040990	SH3-domain kinase binding protein 1
Foxn3	2.47915	1.78998	0.0345422	0.413595	Promoter (3-4kb)	99408735	99409134	12	99341503	99412605	71103	2	71375	ENSMUST00000177269.1	3471	ENSMUSG00000033713	forkhead box N3
Shroom2	2.97891	2.04345	0.0345572	0.413595	Intron (ENSMUST00000101141.8/110380, intron 5 of 9)	152625243	152625642	20	152618914	152643924	25011	2	110380	ENSMUST00000124141.1	18282	ENSMUSG00000045180	shroom family member 2
1700072O05Rik	0.901564	-4.47089	0.0346387	0.414086	Distal Intergenic	120607443	120607842	6	120554796	120562879	8084	1	73505	ENSMUST00000204672.1	52647	NA	RIKEN cDNA 1700072O05 gene
Gpr155	4.38253	0.762186	0.0347402	0.414814	Promoter (<=1kb)	73386497	73386896	2	73341506	73386572	45067	2	68526	ENSMUST00000076463.11	0	ENSMUSG00000041762	G protein-coupled receptor 155
Kcne3	2.85124	-1.64658	0.0347902	0.414927	Intron (ENSMUST00000209114.1/ENSMUST00000209114.1, intron 1 of 1)	100187498	100187897	7	100178716	100184734	6019	1	57442	ENSMUST00000208260.1	8782	ENSMUSG00000035165	potassium voltage-gated channel, Isk-related subfamily, gene 3
Mir692-2	3.96038	0.827708	0.0348437	0.415083	Intron (ENSMUST00000030676.7/14807, intron 13 of 15)	125696056	125696455	4	125504749	125504857	109	1	735288	ENSMUST00000102081.1	191307	ENSMUSG00000094403	microRNA 692-2
Lratd1	4.07283	0.758612	0.0349452	0.415807	Promoter (<=1kb)	14150031	14150430	12	14150534	14151349	816	2	105005	ENSMUST00000221405.1	919	ENSMUSG00000020607	LRAT domain containing 1
Mid2	2.2552	2.41487	0.0350432	0.416489	Intron (ENSMUST00000112990.7/23947, intron 4 of 9)	140737284	140737683	20	140748927	140752117	3191	1	23947	ENSMUST00000140144.1	-11244	ENSMUSG00000000266	midline 2
Rftn1	3.41706	-1.16488	0.0351796	0.41703	Promoter (<=1kb)	50190262	50190661	17	50036623	50190497	153875	2	76438	ENSMUST00000156094.1	0	ENSMUSG00000039316	raftlin lipid raft linker 1
Gm14812	3.59581	1.95094	0.0352091	0.41703	Distal Intergenic	99359008	99359407	20	99405331	99443797	38467	2	100038584	ENSMUST00000156494.1	84390	ENSMUSG00000073051	predicted gene 14812
Alox12	7.21704	-0.447184	0.0352236	0.41703	Promoter (<=1kb)	70254530	70254929	11	70248963	70255341	6379	2	11684	ENSMUST00000108574.2	412	ENSMUSG00000000320	arachidonate 12-lipoxygenase
H2al1j	1.55207	2.4192	0.0352517	0.41703	Distal Intergenic	11521506	11521905	20	11327822	11328151	330	1	236663	ENSMUST00000091180.2	193684	ENSMUSG00000069038	H2A histone family member L1J
4930404N11Rik	5.5866	-0.660505	0.0353473	0.417678	Promoter (<=1kb)	81364310	81364709	10	81363067	81364854	1788	2	432479	ENSMUST00000131736.7	145	ENSMUSG00000020234	RIKEN cDNA 4930404N11 gene
Rbm5	3.39353	1.02485	0.0354321	0.418128	Distal Intergenic	107735608	107736007	9	107743333	107744234	902	2	83486	ENSMUST00000182215.1	8227	ENSMUSG00000032580	RNA binding motif protein 5
Adamtsl1	7.36511	0.511352	0.0354671	0.418128	Intron (ENSMUST00000213098.1/77739, intron 1 of 3)	85709250	85709649	4	85514172	86110862	596691	1	77739	ENSMUST00000213098.1	195078	ENSMUSG00000066113	ADAMTS-like 1
Bmp8a	7.16212	-0.415427	0.0355734	0.418565	Promoter (<=1kb)	123342219	123342618	4	123312645	123342803	30159	2	12163	ENSMUST00000102641.9	185	ENSMUSG00000032726	bone morphogenetic protein 8a
Gm1720	2.38303	2.36274	0.0357412	0.418565	Distal Intergenic	166758516	166758915	20	166662025	166689812	27788	1	382255	ENSMUST00000135086.1	96491	ENSMUSG00000086860	predicted gene 1720
Racgap1	4.10063	0.774288	0.0357541	0.418565	Promoter (2-3kb)	99654311	99654710	15	99620497	99651656	31160	2	26934	ENSMUST00000023756.11	-2655	ENSMUSG00000023015	Rac GTPase-activating protein 1
Tex13a	2.69307	2.22671	0.0357562	0.418565	Intron (ENSMUST00000113063.7/60367, intron 2 of 10)	138018497	138018896	20	138208165	138209580	1416	2	67944	ENSMUST00000096314.2	190684	ENSMUSG00000071686	testis expressed 13A
Gm8817	1.7285	2.58541	0.0358087	0.418565	Distal Intergenic	166980595	166980994	20	167063552	167068389	4838	2	667794	ENSMUST00000171902.2	87395	ENSMUSG00000086008	predicted gene 8817
C1qtnf6	0.94675	2.78006	0.0358577	0.418565	Promoter (<=1kb)	78531559	78531958	15	78527394	78531416	4023	2	72709	ENSMUST00000230943.1	-143	ENSMUSG00000022440	C1q and tumor necrosis factor related protein 6
Mir6995	5.74757	-0.693681	0.0359002	0.418565	Exon (ENSMUST00000111808.10/18011, exon 4 of 6)	47253283	47253682	19	47273519	47273589	71	2	102466782	ENSMUST00000183658.1	19907	ENSMUSG00000098786	microRNA 6995
Gm14827	1.91697	2.50016	0.035906	0.418565	Distal Intergenic	94473022	94473421	20	94442732	94447727	4996	1	100503393	ENSMUST00000146644.1	30290	ENSMUSG00000084904	predicted gene 14827
Bub3	2.81067	-1.93992	0.0359098	0.418565	Intron (ENSMUST00000124096.7/14183, intron 2 of 6)	131660354	131660753	7	131560710	131571164	10455	1	12237	ENSMUST00000207442.1	99644	ENSMUSG00000066979	BUB3 mitotic checkpoint protein
Tmem260	2.25094	-2.30327	0.0360179	0.418565	Distal Intergenic	48428561	48428960	14	48446124	48520368	74245	1	218989	ENSMUST00000227440.1	-17164	ENSMUSG00000036339	transmembrane protein 260
Gjb3	6.67339	-0.42006	0.0361073	0.418565	Promoter (<=1kb)	127330343	127330742	4	127325235	127330844	5610	2	14620	ENSMUST00000046532.3	102	ENSMUSG00000042367	gap junction protein, beta 3
Kif26a	4.13222	-0.829283	0.036116	0.418565	Promoter (1-2kb)	112143942	112144341	12	112146208	112181747	35540	1	668303	ENSMUST00000128402.2	-1867	ENSMUSG00000021294	kinesin family member 26A
Dleu2	2.44397	1.57538	0.0361874	0.418565	Promoter (<=1kb)	61648668	61649067	14	61603589	61648822	45234	2	668253	ENSMUST00000183054.7	0	ENSMUSG00000097589	deleted in lymphocytic leukemia, 2
Mir676	3.00686	1.8425	0.0362489	0.418565	Exon (ENSMUST00000121499.1/ENSMUST00000121499.1, exon 1 of 1)	100329505	100329904	20	100381097	100381185	89	1	751534	ENSMUST00000102443.1	-51193	ENSMUSG00000076398	microRNA 676
Efnb1	2.48763	2.38205	0.036307	0.418565	Distal Intergenic	99215706	99216105	20	99138131	99147230	9100	1	13641	ENSMUST00000151750.1	77575	ENSMUSG00000031217	ephrin B1
Ttc34	4.34592	0.820393	0.0363718	0.418565	Promoter (1-2kb)	154839071	154839470	4	154837459	154867125	29667	1	242800	ENSMUST00000207854.1	1612	ENSMUSG00000046637	tetratricopeptide repeat domain 34
Frmpd4	2.13148	2.33622	0.0363817	0.418565	Intron (ENSMUST00000112147.8/333605, intron 3 of 19)	168017656	168018055	20	167473973	168122826	648854	2	333605	ENSMUST00000112146.8	104771	ENSMUSG00000049176	FERM and PDZ domain containing 4
Sez6	3.15583	1.10147	0.0364378	0.418565	Promoter (3-4kb)	77947900	77948299	11	77951305	77954762	3458	1	20370	ENSMUST00000138346.1	-3006	ENSMUSG00000000632	seizure related gene 6
Lhx2	4.35571	-0.711859	0.0364806	0.418565	Distal Intergenic	38379130	38379529	2	38353802	38360089	6288	1	16870	ENSMUST00000175896.1	25328	ENSMUSG00000000247	LIM homeobox protein 2
Mir6973a	5.87974	-0.538249	0.0365064	0.418565	Promoter (<=1kb)	35195755	35196154	17	35194972	35195049	78	1	102465588	ENSMUST00000183646.1	783	ENSMUSG00000098291	microRNA 6973a
Gfap	5.59672	-0.623479	0.0365769	0.418565	Promoter (3-4kb)	102893372	102893771	11	102887336	102897131	9796	2	14580	ENSMUST00000067444.9	3360	ENSMUSG00000020932	glial fibrillary acidic protein
A730046J19Rik	0	4.36299	0.0366165	0.418565	Distal Intergenic	144096601	144097000	20	144153695	144166274	12580	1	319764	ENSMUST00000135687.1	-56695	ENSMUSG00000085139	RIKEN cDNA A730046J19 gene
Rnf220	6.99377	-0.440124	0.0366777	0.418565	Promoter (3-4kb)	117303083	117303482	4	117285889	117300028	14140	2	66743	ENSMUST00000150148.1	-3055	ENSMUSG00000028677	ring finger protein 220
Rbm41	1.78777	2.66616	0.0366845	0.418565	Intron (ENSMUST00000101212.8/279706, intron 8 of 8)	140016044	140016443	20	139889511	139998595	109085	2	237073	ENSMUST00000087400.11	-17449	ENSMUSG00000031433	RNA binding motif protein 41
Mmp23	7.70693	-0.419447	0.0367134	0.418565	Promoter (<=1kb)	155653181	155653580	4	155650655	155653384	2730	2	26561	ENSMUST00000030937.1	0	ENSMUSG00000029061	matrix metallopeptidase 23
3110082J24Rik	3.36026	0.992142	0.0367333	0.418565	Promoter (<=1kb)	30106293	30106692	5	30103584	30106086	2503	2	433868	ENSMUST00000199573.1	-207	ENSMUSG00000086815	RIKEN cDNA 3110082J24 gene
Bclaf3	0	4.32724	0.0367769	0.418565	Distal Intergenic	159517597	159517996	20	159526688	159551839	25152	1	382252	ENSMUST00000144598.7	-8692	ENSMUSG00000044150	Bclaf1 and Thrap3 family member 3
Cacna1h	5.29619	0.594538	0.0367982	0.418565	Promoter (<=1kb)	25432627	25433026	17	25397625	25433278	35654	2	58226	ENSMUST00000159623.1	252	ENSMUSG00000024112	calcium channel, voltage-dependent, T type, alpha 1H subunit
Smim20	3.50424	-1.12174	0.0368328	0.418565	Distal Intergenic	53257663	53258062	5	53267083	53268591	1509	1	66278	ENSMUST00000203623.1	-9021	ENSMUSG00000061461	small integral membrane protein 20
C230014O12Rik	3.53882	-1.62806	0.0368562	0.418565	Distal Intergenic	34122866	34123265	2	34018289	34107729	89441	2	329387	ENSMUST00000134921.1	-15137	ENSMUSG00000087461	RIKEN cDNA C230014O12 gene
Zdhhc15	3.46091	1.90908	0.0368617	0.418565	Intron (ENSMUST00000042070.5/108672, intron 2 of 11)	104601940	104602339	20	104536969	104671064	134096	2	108672	ENSMUST00000042070.5	68725	ENSMUSG00000033906	zinc finger, DHHC domain containing 15
Dsp	3.62707	-1.09803	0.0369274	0.418565	Distal Intergenic	38145231	38145630	13	38151294	38198577	47284	1	109620	ENSMUST00000124830.2	-5664	ENSMUSG00000054889	desmoplakin
1700039M10Rik	1.03073	-4.59835	0.0369559	0.418565	Intron (ENSMUST00000174545.8/57258, intron 9 of 22)	57609536	57609935	14	57571614	57572368	755	1	67518	ENSMUST00000180397.2	37922	ENSMUSG00000097933	RIKEN cDNA 1700039M10 gene
Rai2	2.59581	1.83772	0.0370517	0.418565	Distal Intergenic	161564150	161564549	20	161717069	161779494	62426	1	24004	ENSMUST00000112338.1	-152520	ENSMUSG00000043518	retinoic acid induced 2
5530601H04Rik	3.69522	1.85985	0.0370703	0.418565	Distal Intergenic	104996577	104996976	20	105044001	105070035	26035	2	71445	ENSMUST00000127409.7	73059	ENSMUSG00000087174	RIKEN cDNA 5530601H04 gene
Dach1	3.073	1.22181	0.0371388	0.418565	Intron (ENSMUST00000069334.7/13134, intron 1 of 10)	98081187	98081586	14	97786853	98169543	382691	2	13134	ENSMUST00000069334.7	87957	ENSMUSG00000055639	dachshund family transcription factor 1
Rin1	5.47053	-0.619325	0.0371665	0.418565	Promoter (<=1kb)	5052352	5052751	19	5053105	5054131	1027	1	225870	ENSMUST00000224032.1	-354	ENSMUSG00000024883	Ras and Rab interactor 1
Celf4	1.04908	2.70392	0.03721	0.418565	Promoter (3-4kb)	25504750	25505149	18	25487268	25501239	13972	2	108013	ENSMUST00000226091.1	-3511	ENSMUSG00000024268	CUGBP, Elav-like family member 4
Tmem164	1.89448	2.46881	0.0372236	0.418565	Distal Intergenic	142605975	142606374	20	142681406	142843494	162089	1	209497	ENSMUST00000112889.7	-75032	ENSMUSG00000047045	transmembrane protein 164
Dcx	1.89448	2.46881	0.0372236	0.418565	Intron (ENSMUST00000033642.9/13193, intron 2 of 6)	143924598	143924997	20	143869210	143933050	63841	2	13193	ENSMUST00000139920.7	8053	ENSMUSG00000031285	doublecortin
Cdkl5	1.89448	2.46881	0.0372236	0.418565	Distal Intergenic	161028092	161028491	20	160784308	160994704	210397	2	382253	ENSMUST00000087104.10	-33388	ENSMUSG00000031292	cyclin-dependent kinase-like 5
Redrum	2.88279	1.60333	0.0373059	0.418565	Distal Intergenic	54458123	54458522	18	54422295	54453294	31000	1	77433	ENSMUST00000181269.2	35828	ENSMUSG00000096982	Redrum, erythroid developmental long intergenic non-protein coding transcript
Brsk2	1.50493	2.2109	0.037339	0.418565	Promoter (<=1kb)	141949714	141950113	7	141949751	141999005	49255	1	75770	ENSMUST00000078200.11	0	ENSMUSG00000053046	BR serine/threonine kinase 2
Thsd4	2.06481	1.73155	0.0373519	0.418565	Intron (ENSMUST00000171654.7/207596, intron 6 of 16)	60227525	60227924	9	59969719	60141220	171502	2	207596	ENSMUST00000034829.5	-86305	ENSMUSG00000032289	thrombospondin, type I, domain containing 4
Acaca	2.99707	1.23606	0.0373768	0.418565	Promoter (<=1kb)	84179486	84179885	11	84179831	84214195	34365	1	107476	ENSMUST00000137500.8	0	ENSMUSG00000020532	acetyl-Coenzyme A carboxylase alpha
4930459C07Rik	2.51489	-2.03741	0.0373857	0.418565	Distal Intergenic	96395696	96396095	10	96226207	96248708	22502	1	74881	ENSMUST00000218720.1	169489	ENSMUSG00000112762	RIKEN cDNA 4930459C07 gene
Sec31b	6.20768	-0.572965	0.0374308	0.418611	Promoter (<=1kb)	44545610	44546009	19	44516957	44545864	28908	2	240667	ENSMUST00000063632.13	0	ENSMUSG00000051984	Sec31 homolog B (S. cerevisiae)
Tmem28	1.88178	2.45105	0.0375616	0.419132	Distal Intergenic	99733623	99734022	20	99821021	99848790	27770	1	620592	ENSMUST00000096363.2	-86999	ENSMUSG00000071719	transmembrane protein 28
Mid1	1.77538	2.64874	0.0375808	0.419132	Distal Intergenic	169527112	169527511	20	169685199	169990795	305597	1	17318	ENSMUST00000112107.7	-157688	ENSMUSG00000035299	midline 1
Grik3	8.03979	0.620589	0.0376451	0.419132	Promoter (<=1kb)	125491634	125492033	4	125490700	125714173	223474	1	14807	ENSMUST00000030676.7	934	ENSMUSG00000001985	glutamate receptor, ionotropic, kainate 3
Camk2b	6.95687	-0.430368	0.0376563	0.419132	Promoter (<=1kb)	6065898	6066297	11	5992820	6066362	73543	2	12323	ENSMUST00000123391.7	65	ENSMUSG00000057897	calcium/calmodulin-dependent protein kinase II, beta
Epha5	1.89228	2.22096	0.0377172	0.419132	Intron (ENSMUST00000053733.14/13839, intron 3 of 15)	84307933	84308332	5	84057791	84416806	359016	2	13839	ENSMUST00000113403.7	108474	ENSMUSG00000029245	Eph receptor A5
Morc4	0.323923	3.34529	0.0378346	0.419132	Promoter (1-2kb)	139837366	139837765	20	139824231	139836103	11873	2	75746	ENSMUST00000172366.1	-1263	ENSMUSG00000031434	microrchidia 4
Gm1720	0.323923	3.34529	0.0378346	0.419132	Distal Intergenic	166841077	166841476	20	166662025	166689812	27788	1	382255	ENSMUST00000135086.1	179052	ENSMUSG00000086860	predicted gene 1720
Gm14858	2.92835	1.84804	0.0378767	0.419132	Intron (ENSMUST00000144761.7/434825, intron 3 of 3)	102304999	102305398	20	102252651	102257689	5039	1	434825	ENSMUST00000138614.1	52348	ENSMUSG00000085568	predicted gene 14858
Mfsd5	4.3693	-0.930852	0.03788	0.419132	Exon (ENSMUST00000181801.1/ENSMUST00000181801.1, exon 1 of 2)	102270673	102271072	15	102279454	102281754	2301	1	106073	ENSMUST00000051341.5	-8382	ENSMUSG00000045665	major facilitator superfamily domain containing 5
Galnt17	4.64121	-0.802415	0.0379771	0.419132	Promoter (<=1kb)	131306223	131306622	5	131085272	131306915	221644	2	212996	ENSMUST00000160807.1	293	ENSMUSG00000034040	polypeptide N-acetylgalactosaminyltransferase 17
Mecom	6.10757	-0.565436	0.0380016	0.419132	Promoter (2-3kb)	30512218	30512617	3	29965456	30509822	544367	2	14013	ENSMUST00000172697.7	-2396	ENSMUSG00000027684	MDS1 and EVI1 complex locus
Grpr	3.0001	1.83122	0.0380132	0.419132	Distal Intergenic	163629604	163630003	20	163513904	163549677	35774	2	14829	ENSMUST00000033730.2	-79927	ENSMUSG00000031364	gastrin releasing peptide receptor
Map3k15	1.68638	2.52784	0.0380387	0.419132	Exon (ENSMUST00000112456.8/58194, exon 18 of 18)	159974162	159974561	20	159988433	160123351	134919	1	270672	ENSMUST00000033665.8	-13872	ENSMUSG00000031303	mitogen-activated protein kinase kinase kinase 15
Armcx6	2.03975	2.15619	0.0380508	0.419132	Promoter (1-2kb)	134752492	134752891	20	134748463	134751417	2955	2	278097	ENSMUST00000052431.11	-1075	ENSMUSG00000050394	armadillo repeat containing, X-linked 6
Trpc5os	1.70474	2.2693	0.038229	0.420374	Intron (ENSMUST00000040184.3/22067, intron 2 of 10)	144484098	144484497	20	144470681	144477063	6383	1	100503240	ENSMUST00000178233.1	13417	ENSMUSG00000072934	transient receptor potential cation channel, subfamily C, member 5, opposite strand
3632454L22Rik	0.275232	3.28961	0.038276	0.420374	Distal Intergenic	135078585	135078984	20	135023533	135060336	36804	2	320606	ENSMUST00000142907.7	-18249	ENSMUSG00000089759	RIKEN cDNA 3632454L22 gene
Ppef1	3.08992	1.95628	0.0382868	0.420374	Intron (ENSMUST00000071204.11/237178, intron 6 of 15)	160664353	160664752	20	160693571	160719936	26366	2	237178	ENSMUST00000136888.1	55184	ENSMUSG00000062168	protein phosphatase with EF hand calcium-binding domain 1
Nhsl2	3.6697	1.48832	0.0383768	0.420911	Intron (ENSMUST00000124279.5/100042480, intron 2 of 2)	101954163	101954562	20	101961797	102077881	116085	1	100042480	ENSMUST00000155477.1	-7235	ENSMUSG00000079481	NHS-like 2
Frmpd4	2.63772	2.14072	0.0385097	0.421211	Intron (ENSMUST00000112147.8/333605, intron 3 of 19)	168042887	168043286	20	167473973	168122826	648854	2	333605	ENSMUST00000112146.8	79540	ENSMUSG00000049176	FERM and PDZ domain containing 4
Zdhhc15	2.4058	2.01538	0.0385152	0.421211	Promoter (1-2kb)	104669436	104669835	20	104536969	104671064	134096	2	108672	ENSMUST00000042070.5	1229	ENSMUSG00000033906	zinc finger, DHHC domain containing 15
Thsd4	1.95002	1.80036	0.0385277	0.421211	Intron (ENSMUST00000171654.7/207596, intron 6 of 16)	60222299	60222698	9	59969719	60141220	171502	2	207596	ENSMUST00000034829.5	-81079	ENSMUSG00000032289	thrombospondin, type I, domain containing 4
7630403G23Rik	2.88785	-1.6379	0.038712	0.422775	Intron (ENSMUST00000215057.1/ENSMUST00000215057.1, intron 5 of 6)	33917826	33918225	9	34042369	34059019	16651	1	77119	ENSMUST00000184229.1	-124144	ENSMUSG00000098758	RIKEN cDNA 7630403G23 gene
Mal	6.93779	-0.517605	0.03878	0.422906	Promoter (<=1kb)	127656173	127656572	2	127634874	127656219	21346	2	17153	ENSMUST00000028853.6	0	ENSMUSG00000027375	myelin and lymphocyte protein, T cell differentiation protein
Grpr	0.21493	3.22024	0.038828	0.422906	Distal Intergenic	163453481	163453880	20	163513904	163549677	35774	2	14829	ENSMUST00000033730.2	95797	ENSMUSG00000031364	gastrin releasing peptide receptor
Gm5643	1.47891	2.65775	0.038848	0.422906	Distal Intergenic	142265633	142266032	20	142297565	142298530	966	1	434858	ENSMUST00000117081.1	-31533	NA	heterogeneous nuclear ribonucleoprotein A1 pseudogene
Frmpd3	2.56497	2.21588	0.0389519	0.423587	Intron (ENSMUST00000208130.1/245643, intron 1 of 14)	140347804	140348203	20	140342263	140435467	93205	1	245643	ENSMUST00000208130.1	5541	ENSMUSG00000042425	FERM and PDZ domain containing 3
Sh3kbp1	0.20314	3.20665	0.039008	0.423746	Intron (ENSMUST00000112456.8/58194, intron 1 of 17)	159645437	159645836	20	159627541	159973169	345629	1	58194	ENSMUST00000073094.9	17896	ENSMUSG00000040990	SH3-domain kinase binding protein 1
Grb10	5.62814	0.907953	0.0390603	0.423864	Promoter (4-5kb)	12032125	12032524	11	11930508	12027971	97464	2	14783	ENSMUST00000109654.7	-4154	ENSMUSG00000020176	growth factor receptor bound protein 10
Uts2r	6.03945	-0.553002	0.0391056	0.423906	Promoter (3-4kb)	121156551	121156950	11	121160271	121161973	1703	1	217369	ENSMUST00000039044.1	-3321	ENSMUSG00000039321	urotensin 2 receptor
Slc35f4	4.00947	-0.849077	0.0392022	0.424405	Intron (ENSMUST00000138884.7/75288, intron 1 of 8)	49370016	49370415	14	49303306	49314209	10904	2	75288	ENSMUST00000135254.1	-55807	ENSMUSG00000021852	solute carrier family 35, member F4
B230112J18Rik	4.71984	0.664948	0.0392677	0.424405	Promoter (2-3kb)	116314396	116314795	5	116312360	116318281	5922	1	77846	ENSMUST00000128473.1	2036	ENSMUSG00000086715	RIKEN cDNA B230112J18 gene
Tmem28	2.92316	1.72933	0.039276	0.424405	Distal Intergenic	99717708	99718107	20	99821021	99848790	27770	1	620592	ENSMUST00000096363.2	-102914	ENSMUSG00000071719	transmembrane protein 28
Gpr26	7.0405	-0.393957	0.0393521	0.424778	Promoter (<=1kb)	131967034	131967433	7	131966460	131994405	27946	1	233919	ENSMUST00000045840.4	574	ENSMUSG00000040125	G protein-coupled receptor 26
Fabp3	6.24944	-0.477556	0.0395054	0.425055	Promoter (<=1kb)	130308964	130309363	4	130308595	130315463	6869	1	14077	ENSMUST00000070532.7	369	ENSMUSG00000028773	fatty acid binding protein 3, muscle and heart
Rmi1	5.59481	-0.575581	0.0395637	0.425055	Distal Intergenic	58452999	58453398	13	58405066	58410096	5031	1	74386	ENSMUST00000224479.1	47933	ENSMUSG00000035367	RecQ mediated genome instability 1
Fto	5.33984	0.60414	0.0395779	0.425055	Intron (ENSMUST00000069718.14/26383, intron 7 of 8)	91518030	91518429	8	91467685	91666946	199262	1	26383	ENSMUST00000140276.1	50345	ENSMUSG00000055932	fat mass and obesity associated
Gm1720	1.57034	2.77856	0.0396011	0.425055	Distal Intergenic	166802263	166802662	20	166662025	166689812	27788	1	382255	ENSMUST00000135086.1	140238	ENSMUSG00000086860	predicted gene 1720
Ror1	4.04188	-0.882449	0.0396276	0.425055	Promoter (<=1kb)	100096464	100096863	4	100095791	100444765	348975	1	26563	ENSMUST00000039630.5	673	ENSMUSG00000035305	receptor tyrosine kinase-like orphan receptor 1
Ccnjl	1.72804	-2.75476	0.0396738	0.425055	Promoter (<=1kb)	43529269	43529668	11	43529246	43556689	27444	1	380694	ENSMUST00000152153.1	23	ENSMUSG00000044707	cyclin J-like
Tmem164	0.935859	3.11549	0.0397	0.425055	Distal Intergenic	142575793	142576192	20	142681406	142843494	162089	1	209497	ENSMUST00000112889.7	-105214	ENSMUSG00000047045	transmembrane protein 164
Pdzrn3	4.74845	0.739702	0.0397142	0.425055	Intron (ENSMUST00000075994.10/55983, intron 3 of 9)	101271794	101272193	6	101169856	101199200	29345	2	55983	ENSMUST00000144505.1	-72594	ENSMUSG00000035357	PDZ domain containing RING finger 3
Rgs22	4.72786	-0.674722	0.039831	0.425055	Promoter (<=1kb)	36140092	36140491	15	36009479	36140400	130922	2	626596	ENSMUST00000172831.7	0	ENSMUSG00000037627	regulator of G-protein signalling 22
Tlr9	2.25517	-2.39317	0.0398647	0.425055	Promoter (3-4kb)	106226107	106226506	9	106222598	106226883	4286	1	81897	ENSMUST00000062241.10	3509	ENSMUSG00000045322	toll-like receptor 9
Spock2	6.43547	-0.532487	0.0399703	0.425055	Promoter (<=1kb)	60106939	60107338	10	60106468	60133908	27441	1	94214	ENSMUST00000165024.2	471	ENSMUSG00000058297	sparc/osteonectin, cwcv and kazal-like domains proteoglycan 2
Taf7l2	2.04359	-2.99365	0.0400017	0.425055	Intron (ENSMUST00000063470.10/19279, intron 2 of 13)	116072301	116072700	10	116112483	116113592	1110	2	619332	ENSMUST00000219858.1	40892	ENSMUSG00000074734	Taf7l2
Amelx	1.20639	2.80379	0.0400572	0.425055	Exon (ENSMUST00000033721.12/11856, exon 4 of 13)	169246433	169246832	20	169180022	169187200	7179	2	11704	ENSMUST00000154923.1	-59233	ENSMUSG00000031354	amelogenin, X-linked
Kbtbd11	4.93488	0.68942	0.0400617	0.425055	Promoter (<=1kb)	15010935	15011334	8	15011025	15033333	22309	1	74901	ENSMUST00000069399.6	0	ENSMUSG00000055675	kelch repeat and BTB (POZ) domain containing 11
Mir5130	4.73401	-0.667495	0.0400739	0.425055	Promoter (<=1kb)	102981235	102981634	14	102982549	102982632	84	2	100628599	ENSMUST00000175160.1	998	ENSMUSG00000092901	microRNA 5130
Mical3	3.04501	1.12235	0.0401049	0.425055	Promoter (<=1kb)	121130781	121131180	6	121022208	121130999	108792	2	194401	ENSMUST00000204248.1	0	ENSMUSG00000051586	microtubule associated monooxygenase, calponin and LIM domain containing 3
Armc2	1.8981	-2.83979	0.0401202	0.425055	Promoter (1-2kb)	41994870	41995269	10	41986614	41993166	6553	2	213402	ENSMUST00000161167.1	-1704	ENSMUSG00000071324	armadillo repeat containing 2
Gm26633	6.52819	-0.50096	0.0401538	0.425055	Promoter (<=1kb)	79052758	79053157	7	79018053	79053323	35271	2	102633600	ENSMUST00000180546.1	166	ENSMUSG00000097441	predicted gene, 26633
Ddost	3.07008	1.10026	0.0401895	0.425055	Promoter (<=1kb)	138304457	138304856	4	138304730	138312628	7899	1	13200	ENSMUST00000030538.4	0	ENSMUSG00000028757	dolichyl-di-phosphooligosaccharide-protein glycotransferase
Pth2r	4.33356	-0.732995	0.0402989	0.425055	Promoter (<=1kb)	65311409	65311808	1	65311257	65389244	77988	1	213527	ENSMUST00000027083.6	152	ENSMUSG00000025946	parathyroid hormone 2 receptor
Sytl4	2.03444	2.66079	0.0403293	0.425055	Promoter (3-4kb)	133977402	133977801	20	133936385	133981783	45399	2	27359	ENSMUST00000113297.8	3982	ENSMUSG00000031255	synaptotagmin-like 4
Exoc3l2	8.0056	-0.447183	0.0403306	0.425055	Promoter (<=1kb)	19489306	19489705	7	19489056	19496760	7705	1	74463	ENSMUST00000011407.7	250	ENSMUSG00000011263	exocyst complex component 3-like 2
Plp1	0.804548	2.95551	0.0403331	0.425055	Promoter (3-4kb)	136827108	136827507	20	136831162	136832592	1431	1	18823	ENSMUST00000125644.1	-3655	ENSMUSG00000031425	proteolipid protein (myelin) 1
Tbc1d30	5.98728	-0.558379	0.0404015	0.425081	Promoter (<=1kb)	121350893	121351292	10	121302083	121351278	49196	2	74694	ENSMUST00000219179.1	0	ENSMUSG00000052302	TBC1 domain family, member 30
Epha7	3.24327	1.06718	0.0404186	0.425081	Exon (ENSMUST00000029964.11/13841, exon 17 of 17)	28963677	28964076	4	28871924	28946334	74411	1	13841	ENSMUST00000129912.1	91753	ENSMUSG00000028289	Eph receptor A7
Cd80	3.60304	-1.06053	0.0405379	0.425754	Intron (ENSMUST00000231716.1/12519, intron 5 of 6)	38483217	38483616	16	38459118	38486447	27330	1	12519	ENSMUST00000232409.1	24099	ENSMUSG00000075122	CD80 antigen
Dppa3	3.32325	-1.24937	0.0405939	0.425754	Distal Intergenic	122663034	122663433	6	122626753	122630272	3520	1	73708	ENSMUST00000123429.1	36281	ENSMUSG00000046323	developmental pluripotency-associated 3
Chodl	3.63626	-1.38907	0.0406178	0.425754	Distal Intergenic	78831180	78831579	16	78930948	78947155	16208	1	246048	ENSMUST00000114216.1	-99369	ENSMUSG00000022860	chondrolectin
Tg	2.00859	-2.95727	0.0406491	0.425754	Exon (ENSMUST00000065916.13/21819, exon 27 of 48)	66729238	66729637	15	66736250	66850721	114472	1	21819	ENSMUST00000172153.1	-6613	ENSMUSG00000053469	thyroglobulin
Prps2	2.74222	2.12815	0.0407102	0.425958	Exon (ENSMUST00000238211.1/333605, exon 13 of 17)	167488883	167489282	20	167346322	167382749	36428	2	110639	ENSMUST00000026839.4	-106134	ENSMUSG00000025742	phosphoribosyl pyrophosphate synthetase 2
Cfap44	3.30525	-1.18456	0.0408268	0.42624	Exon (ENSMUST00000099742.8/212517, exon 35 of 35)	44482292	44482691	16	44470444	44482428	11985	1	212517	ENSMUST00000127303.1	11848	ENSMUSG00000071550	cilia and flagella associated protein 44
Calcr	6.2486	-0.487437	0.0408735	0.42624	Promoter (<=1kb)	3763449	3763848	6	3685680	3763630	77951	2	12311	ENSMUST00000171613.7	0	ENSMUSG00000023964	calcitonin receptor
Tenm3	3.51716	-1.38827	0.0409812	0.42624	Distal Intergenic	48945828	48946227	8	48646261	48843951	197691	2	23965	ENSMUST00000211812.1	-101877	ENSMUSG00000031561	teneurin transmembrane protein 3
Gad1	8.51496	0.550386	0.0410257	0.42624	Promoter (<=1kb)	70563370	70563769	2	70563442	70585946	22505	1	14415	ENSMUST00000123330.2	0	ENSMUSG00000070880	glutamate decarboxylase 1
Dmrtc1c2	0.759135	2.89917	0.0410271	0.42624	Distal Intergenic	102821786	102822185	20	102804223	102805916	1694	1	668357	ENSMUST00000131451.1	17563	ENSMUSG00000067561	DMRT-like family C1c2
Pwwp3b	0.759135	2.89917	0.0410271	0.42624	Exon (ENSMUST00000126339.8/78526, exon 18 of 20)	139274916	139275315	20	139217166	139238335	21170	1	245631	ENSMUST00000113042.2	57750	ENSMUSG00000042515	PWWP domain containing 3B
Arhgap6	2.20631	2.34435	0.0410287	0.42624	Intron (ENSMUST00000033721.12/11856, intron 1 of 12)	169075795	169076194	20	169113047	169304435	191389	1	11856	ENSMUST00000112127.1	-36853	ENSMUSG00000031355	Rho GTPase activating protein 6
Prps1	1.19926	2.79457	0.0412034	0.427228	Distal Intergenic	140451058	140451457	20	140456613	140465442	8830	1	19139	ENSMUST00000155235.1	-5156	ENSMUSG00000031432	phosphoribosyl pyrophosphate synthetase 1
Hoxc4	7.48604	0.620897	0.0412073	0.427228	Promoter (<=1kb)	103018013	103018412	15	103018934	103036405	17472	1	15423	ENSMUST00000165375.2	-522	ENSMUSG00000075394	homeobox C4
Armcx2	2.58519	1.91816	0.0412687	0.427431	Distal Intergenic	134854228	134854627	20	134804147	134809221	5075	2	67416	ENSMUST00000168264.1	-45007	ENSMUSG00000033436	armadillo repeat containing, X-linked 2
Col4a6	1.48328	2.66378	0.0413446	0.427785	Intron (ENSMUST00000101205.2/94216, intron 3 of 44)	141252335	141252734	20	141186191	141207602	21412	2	94216	ENSMUST00000137051.7	-44733	ENSMUSG00000031273	collagen, type IV, alpha 6
Clybl	6.7728	-0.517398	0.0414541	0.428484	Intron (ENSMUST00000026625.6/69634, intron 1 of 7)	122280734	122281133	14	122258041	122402227	144187	1	69634	ENSMUST00000226136.1	22693	ENSMUSG00000025545	citrate lyase beta like
Ell	4.34224	0.71013	0.0415376	0.428914	Promoter (<=1kb)	70539202	70539601	8	70539457	70581641	42185	1	13716	ENSMUST00000210155.1	0	ENSMUSG00000070002	elongation factor RNA polymerase II
Frmpd4	4.66355	1.34702	0.0416999	0.429473	Promoter (<=1kb)	168123301	168123700	20	167473435	168123330	649896	2	333605	ENSMUST00000112149.8	0	ENSMUSG00000049176	FERM and PDZ domain containing 4
Prps1	2.20602	2.15216	0.0417382	0.429473	Distal Intergenic	140494000	140494399	20	140456613	140476140	19528	1	19139	ENSMUST00000033809.3	37387	ENSMUSG00000031432	phosphoribosyl pyrophosphate synthetase 1
Trpc5os	2.0602	2.40156	0.0417513	0.429473	Promoter (1-2kb)	144458143	144458542	20	144456581	144477066	20486	1	100503240	ENSMUST00000155206.7	1562	ENSMUSG00000072934	transient receptor potential cation channel, subfamily C, member 5, opposite strand
Met	4.76233	-0.682691	0.0417595	0.429473	Promoter (<=1kb)	17463808	17464207	6	17463827	17491747	27921	1	17295	ENSMUST00000140070.7	0	ENSMUSG00000009376	met proto-oncogene
Bcl11b	3.60867	1.10275	0.0418337	0.429803	Promoter (1-2kb)	108005151	108005550	12	107910403	108003602	93200	2	58208	ENSMUST00000066060.10	-1549	ENSMUSG00000048251	B cell leukemia/lymphoma 11B
Paupar	2.93664	-1.77395	0.0419905	0.430982	Intron (ENSMUST00000149133.7/402728, intron 1 of 3)	105610115	105610514	2	105657862	105661343	3482	2	103164605	ENSMUST00000194826.2	50829	ENSMUSG00000102424	Pax6 upstream antisense RNA
Meg3	4.49275	-0.671338	0.0420859	0.431528	Distal Intergenic	109527917	109528316	12	109541001	109545319	4319	1	17263	ENSMUST00000129245.7	-12685	ENSMUSG00000021268	maternally expressed 3
A530065N20Rik	2.42896	-1.98816	0.0421863	0.431532	Distal Intergenic	59941197	59941596	13	60029711	60116669	86959	1	328263	ENSMUST00000225266.1	-88115	ENSMUSG00000114531	RIKEN cDNA A530046M15 gene
Ogt	2.04126	2.37427	0.0422178	0.431532	Promoter (<=1kb)	101640308	101640707	20	101640140	101652894	12755	1	108155	ENSMUST00000155792.1	168	ENSMUSG00000034160	O-linked N-acetylglucosamine (GlcNAc) transferase (UDP-N-acetylglucosamine:polypeptide-N-acetylglucosaminyl transferase)
Cxcl12	7.15034	-0.458773	0.0422409	0.431532	Promoter (<=1kb)	117169069	117169468	6	117168577	117181367	12791	1	20315	ENSMUST00000073043.4	492	ENSMUSG00000061353	chemokine (C-X-C motif) ligand 12
Sowahd	7.04874	-0.371818	0.0422549	0.431532	Promoter (<=1kb)	37048283	37048682	20	37048845	37050418	1574	1	245381	ENSMUST00000060057.1	-163	ENSMUSG00000044400	sosondowah ankyrin repeat domain family member D
Tmem164	0.767845	2.90999	0.0423797	0.43197	Distal Intergenic	142650723	142651122	20	142681406	142843494	162089	1	209497	ENSMUST00000112889.7	-30284	ENSMUSG00000047045	transmembrane protein 164
Gfi1	8.20132	0.441644	0.0424028	0.43197	Promoter (2-3kb)	107721762	107722161	5	107716657	107724343	7687	2	14581	ENSMUST00000031205.15	2182	ENSMUSG00000029275	growth factor independent 1 transcription repressor
H2al1j	2.92656	1.62814	0.0424245	0.43197	Distal Intergenic	11665592	11665991	20	11327822	11328151	330	1	236663	ENSMUST00000091180.2	337770	ENSMUSG00000069038	H2A histone family member L1J
Trmt11	2.80546	1.21313	0.0425002	0.432311	Distal Intergenic	30407982	30408381	10	30559121	30590109	30989	2	73681	ENSMUST00000215041.1	181728	ENSMUSG00000019792	tRNA methyltransferase 11
Nrk	2.01696	2.33939	0.0425726	0.432389	Intron (ENSMUST00000064937.13/27206, intron 2 of 27)	138951575	138951974	20	138982718	138989778	7061	1	27206	ENSMUST00000155201.1	-30744	ENSMUSG00000052854	Nik related kinase
Ppara	1.83868	-2.85086	0.0426147	0.432389	Intron (ENSMUST00000134880.7/19013, intron 2 of 2)	85747764	85748163	15	85736131	85801748	65618	1	19013	ENSMUST00000057979.5	11633	ENSMUSG00000022383	peroxisome proliferator activated receptor alpha
Eef2k	4.52071	-0.70007	0.0426346	0.432389	Exon (ENSMUST00000208668.1/436008, exon 12 of 12)	120830882	120831281	7	120842831	120907450	64620	1	13631	ENSMUST00000047875.15	-11550	ENSMUSG00000035064	eukaryotic elongation factor-2 kinase
Rgl3	0.654734	2.89145	0.042726	0.432574	Promoter (<=1kb)	21973679	21974078	9	21971749	21974283	2535	2	71746	ENSMUST00000213558.1	205	ENSMUSG00000040146	ral guanine nucleotide dissociation stimulator-like 3
Adcy4	7.29191	-0.404678	0.0427479	0.432574	Promoter (<=1kb)	55783622	55784021	14	55769093	55783686	14594	2	104110	ENSMUST00000226361.1	0	ENSMUSG00000022220	adenylate cyclase 4
Inpp5a	3.90927	0.739879	0.0427919	0.432574	Promoter (<=1kb)	139388707	139389106	7	139389109	139579652	190544	1	212111	ENSMUST00000106098.7	-3	ENSMUSG00000025477	inositol polyphosphate-5-phosphatase A
Sh3kbp1	1.84598	2.40038	0.0428294	0.432574	Promoter (3-4kb)	159922992	159923391	20	159919859	159973319	53461	1	58194	ENSMUST00000152426.1	3133	ENSMUSG00000040990	SH3-domain kinase binding protein 1
Tex13b	2.5747	1.90126	0.0429401	0.432574	Distal Intergenic	140852386	140852785	20	140808307	140813433	5127	2	83555	ENSMUST00000044179.7	-38953	ENSMUSG00000042386	testis expressed 13B
Ctps2	0.226707	3.23378	0.0429728	0.432574	Distal Intergenic	163105553	163105952	20	162969105	163031319	62215	1	55936	ENSMUST00000112300.1	136448	ENSMUSG00000031360	cytidine 5'-triphosphate synthase 2
Cemip	5.95287	-0.557365	0.0429906	0.432574	Promoter (<=1kb)	84085142	84085541	7	83932857	84086502	153646	2	80982	ENSMUST00000064174.11	961	ENSMUSG00000052353	cell migration inducing protein, hyaluronan binding
Cpne8	3.99104	-0.821291	0.0429911	0.432574	Promoter (<=1kb)	90679052	90679451	15	90487482	90679371	191890	2	66871	ENSMUST00000088649.10	0	ENSMUSG00000052560	copine VIII
Map3k7	0.75613	-4.33269	0.0432466	0.433764	Distal Intergenic	31835257	31835656	4	31964097	32023467	59371	1	26409	ENSMUST00000037607.10	-128441	ENSMUSG00000028284	mitogen-activated protein kinase kinase kinase 7
Kndc1	5.06644	0.623939	0.0433244	0.433764	Promoter (<=1kb)	139894529	139894928	7	139894696	139941537	46842	1	76484	ENSMUST00000053445.15	0	ENSMUSG00000066129	kinase non-catalytic C-lobe domain (KIND) containing 1
Ets1	3.16037	1.06138	0.0433434	0.433764	Exon (ENSMUST00000214084.1/ENSMUST00000214084.1, exon 1 of 3)	32613918	32614317	9	32636221	32729830	93610	1	23871	ENSMUST00000183879.1	-21904	ENSMUSG00000032035	E26 avian leukemia oncogene 1, 5' domain
4921513I03Rik	5.46035	-0.631264	0.0434158	0.433764	Distal Intergenic	120722865	120723264	10	120765732	120774481	8750	1	70874	ENSMUST00000219219.1	-42468	ENSMUSG00000044544	RIKEN cDNA 4921513I03 gene
Tmem28	3.01473	1.96431	0.0434514	0.433764	Distal Intergenic	99867718	99868117	20	99821021	99848790	27770	1	620592	ENSMUST00000096363.2	46697	ENSMUSG00000071719	transmembrane protein 28
Fbxo8	4.62151	-0.859724	0.0434995	0.433764	Distal Intergenic	56621330	56621729	8	56587920	56591473	3554	1	50753	ENSMUST00000211294.1	33410	ENSMUSG00000038206	F-box protein 8
Crb2	4.32705	-0.738011	0.0435372	0.433764	Distal Intergenic	37765662	37766061	2	37776249	37799103	22855	1	241324	ENSMUST00000050372.9	-10188	ENSMUSG00000035403	crumbs family member 2
Dgkh	5.42238	-0.640033	0.0435875	0.433764	Promoter (<=1kb)	78725260	78725659	14	78569609	78725089	155481	2	380921	ENSMUST00000074729.5	-171	ENSMUSG00000034731	diacylglycerol kinase, eta
Phf8	2.98486	1.80569	0.0436097	0.433764	Distal Intergenic	151644590	151644989	20	151629817	151633859	4043	1	320595	ENSMUST00000138318.1	14773	ENSMUSG00000041229	PHD finger protein 8
Kcnk1	5.37547	-1.0187	0.0436922	0.433764	Promoter (<=1kb)	125995868	125996267	8	125995436	126030683	35248	1	16525	ENSMUST00000212831.1	432	ENSMUSG00000033998	potassium channel, subfamily K, member 1
Aqp11	4.64839	-0.726599	0.0437721	0.433764	Promoter (<=1kb)	97737621	97738020	7	97726379	97737938	11560	2	66333	ENSMUST00000084986.7	0	ENSMUSG00000042797	aquaporin 11
Frmpd4	1.84734	2.15529	0.0438301	0.433764	Intron (ENSMUST00000112147.8/333605, intron 2 of 19)	168517611	168518010	20	167471309	168577231	1105923	2	333605	ENSMUST00000112147.8	59221	ENSMUSG00000049176	FERM and PDZ domain containing 4
Scgn	4.15675	-0.761246	0.0438611	0.433764	Promoter (<=1kb)	23991399	23991798	13	23953456	23991214	37759	2	214189	ENSMUST00000021770.7	-185	ENSMUSG00000021337	secretagogin, EF-hand calcium binding protein
Bik	5.926	-0.53671	0.0438755	0.433764	Promoter (<=1kb)	83526874	83527273	15	83526872	83544632	17761	1	12124	ENSMUST00000230912.1	2	ENSMUSG00000016758	BCL2-interacting killer
Cartpt	6.18296	-0.610895	0.0439325	0.433764	Promoter (<=1kb)	99900116	99900515	13	99898489	99900641	2153	2	27220	ENSMUST00000022150.7	126	ENSMUSG00000021647	CART prepropeptide
Nup62cl	2.49816	1.81924	0.0439345	0.433764	Intron (ENSMUST00000101212.8/279706, intron 3 of 8)	140032843	140033242	20	140022062	140062293	40232	2	279706	ENSMUST00000154385.7	29051	ENSMUSG00000072944	nucleoporin 62 C-terminal like
Maged1	1.25827	2.87011	0.043938	0.433764	Promoter (<=1kb)	94541283	94541682	20	94535476	94541990	6515	2	94275	ENSMUST00000153386.7	308	ENSMUSG00000025151	MAGE family member D1
Adra1a	6.85284	-0.428313	0.0440146	0.433764	Promoter (2-3kb)	66637664	66638063	14	66635556	66732741	97186	1	11549	ENSMUST00000161339.1	2108	ENSMUSG00000045875	adrenergic receptor, alpha 1a
Hs3st3b1	7.95254	-0.482693	0.0440562	0.433764	Promoter (<=1kb)	63921761	63922160	11	63885792	63922290	36499	2	54710	ENSMUST00000094103.3	130	ENSMUSG00000070407	heparan sulfate (glucosamine) 3-O-sulfotransferase 3B1
Fbln2	3.43268	0.979056	0.0440736	0.433764	Distal Intergenic	91286282	91286681	6	91265879	91272431	6553	1	14115	ENSMUST00000137029.1	20403	ENSMUSG00000064080	fibulin 2
Pter	2.69007	1.48733	0.0440957	0.433764	Intron (ENSMUST00000154269.6/19212, intron 1 of 5)	12969680	12970079	2	12977939	13001859	23921	1	19212	ENSMUST00000195521.1	-7860	ENSMUSG00000026730	phosphotriesterase related
Eno4	1.75049	-2.75929	0.0441049	0.433764	Intron (ENSMUST00000163821.2/71653, intron 14 of 14)	58996441	58996840	19	58955456	58970933	15478	1	226265	ENSMUST00000201123.1	40985	ENSMUSG00000048029	enolase 4
Mbp	2.67287	1.66586	0.0442015	0.433764	Promoter (<=1kb)	82475405	82475804	18	82475370	82584217	108848	1	17196	ENSMUST00000143506.7	35	ENSMUSG00000041607	myelin basic protein
Fgg	3.88549	-0.934629	0.0442457	0.433764	Exon (ENSMUST00000194580.1/ENSMUST00000194580.1, exon 1 of 3)	82995301	82995700	3	83007724	83015049	7326	1	99571	ENSMUST00000048486.12	-12024	ENSMUSG00000033860	fibrinogen gamma chain
Gm32921	3.79575	-1.05692	0.0442557	0.433764	Distal Intergenic	106386144	106386543	5	106321340	106323217	1878	1	102635633	ENSMUST00000200592.1	64804	ENSMUSG00000105508	predicted gene, 32921
Pde4a	5.19167	-0.607477	0.0442991	0.433764	Promoter (<=1kb)	21184135	21184534	9	21184103	21211627	27525	1	18577	ENSMUST00000115458.8	32	ENSMUSG00000032177	phosphodiesterase 4A, cAMP specific
Ap1s1	3.50437	0.932146	0.0443272	0.433764	Promoter (<=1kb)	137045904	137046303	5	137034993	137046135	11143	2	11769	ENSMUST00000111080.7	0	ENSMUSG00000004849	adaptor protein complex AP-1, sigma 1
Actl10	3.93992	-0.781257	0.0444087	0.433764	Promoter (<=1kb)	154551923	154552322	2	154551776	154553276	1501	1	70362	ENSMUST00000226583.1	147	ENSMUSG00000078129	actin-like 10
Ifitm10	2.0874	-2.20296	0.044421	0.433764	Intron (ENSMUST00000059223.14/320802, intron 2 of 3)	142354904	142355303	7	142325837	142338022	12186	2	320802	ENSMUST00000131791.1	-16882	ENSMUSG00000045777	interferon induced transmembrane protein 10
Grpr	2.14508	2.25488	0.0444664	0.433764	Distal Intergenic	163342324	163342723	20	163513904	163549677	35774	2	14829	ENSMUST00000033730.2	206954	ENSMUSG00000031364	gastrin releasing peptide receptor
Pcdh18	0.914867	-4.47942	0.0444926	0.433764	Distal Intergenic	48893681	48894080	3	49752421	49755464	3044	2	73173	ENSMUST00000194603.1	861384	ENSMUSG00000037892	protocadherin 18
Meiob	6.50358	-0.537441	0.0445241	0.433764	Promoter (<=1kb)	24804497	24804896	17	24804359	24839787	35429	1	75178	ENSMUST00000234455.1	138	ENSMUSG00000024155	meiosis specific with OB domains
Nyx	0.813227	2.9662	0.0446065	0.433764	Intron (ENSMUST00000050434.5/236690, intron 2 of 2)	13477646	13478045	20	13466110	13489313	23204	1	236690	ENSMUST00000050434.5	11536	ENSMUSG00000051228	nyctalopin
Shtn1	4.40326	-0.693408	0.0446124	0.433764	Promoter (<=1kb)	59075572	59075971	19	58973356	59076069	102714	2	71653	ENSMUST00000163821.2	98	ENSMUSG00000041362	shootin 1
Slc45a4	1.21348	2.76294	0.0446316	0.433764	Distal Intergenic	73673998	73674397	15	73605593	73645762	40170	2	106068	ENSMUST00000130765.1	-28236	ENSMUSG00000079020	solute carrier family 45, member 4
Lrrn4	5.25498	-0.584422	0.0446453	0.433764	Promoter (1-2kb)	132879338	132879737	2	132868305	132880891	12587	2	320974	ENSMUST00000049787.2	1154	ENSMUSG00000043110	leucine rich repeat neuronal 4
A930012L18Rik	2.52925	-2.04008	0.0446778	0.433764	Promoter (<=1kb)	44660782	44661181	18	44661665	44676271	14607	1	626275	ENSMUST00000181094.1	-484	ENSMUSG00000097610	RIKEN cDNA A930012L18 gene
Gtf3a	3.55681	0.839979	0.0447792	0.43433	Promoter (<=1kb)	146948428	146948827	5	146948657	146955614	6958	1	66596	ENSMUST00000146511.7	0	ENSMUSG00000016503	general transcription factor III A
Bfsp1	2.32571	1.79851	0.0448443	0.43433	Promoter (<=1kb)	143863152	143863551	2	143826528	143863173	36646	2	12075	ENSMUST00000028907.13	0	ENSMUSG00000027420	beaded filament structural protein 1, in lens-CP94
Rnf224	0.841892	-4.40887	0.0448633	0.43433	Promoter (<=1kb)	25236923	25237322	2	25234476	25236787	2312	2	329360	ENSMUST00000091318.4	-136	ENSMUSG00000089953	ring finger protein 224
Msl3	1.47021	2.3059	0.0449819	0.434417	Promoter (<=1kb)	168673079	168673478	20	168654117	168673898	19782	2	17692	ENSMUST00000033725.15	420	ENSMUSG00000031358	MSL complex subunit 3
Prkce	4.28706	-0.694897	0.045015	0.434417	Promoter (<=1kb)	86168767	86169166	17	86168174	86655415	487242	1	18754	ENSMUST00000097274.2	593	ENSMUSG00000045038	protein kinase C, epsilon
Usp43	4.54173	-0.673271	0.0450383	0.434417	Promoter (<=1kb)	67921383	67921782	11	67897239	67921209	23971	2	216835	ENSMUST00000152120.1	-174	ENSMUSG00000020905	ubiquitin specific peptidase 43
Zfp467	5.69132	-0.59228	0.0450557	0.434417	Exon (ENSMUST00000114559.7/68910, exon 5 of 5)	48438596	48438995	6	48427697	48444036	16340	2	68910	ENSMUST00000114566.7	5041	ENSMUSG00000068551	zinc finger protein 467
Socs1	4.07523	-0.822005	0.0450847	0.434417	Promoter (<=1kb)	10784348	10784747	16	10782240	10785536	3297	2	12703	ENSMUST00000229866.1	789	ENSMUSG00000038037	suppressor of cytokine signaling 1
Miat	3.04469	1.06455	0.0453082	0.435611	Promoter (<=1kb)	112227939	112228338	5	112228106	112228641	536	2	330166	ENSMUST00000182699.1	303	ENSMUSG00000097767	myocardial infarction associated transcript (non-protein coding)
Fignl2	6.51112	-0.448197	0.0454311	0.435611	Promoter (1-2kb)	101052963	101053362	15	101050194	101054399	4206	2	668225	ENSMUST00000178140.1	1037	ENSMUSG00000095440	fidgetin-like 2
Ptk2b	6.58904	-0.432254	0.0454683	0.435611	Promoter (<=1kb)	66280624	66281023	14	66153844	66280982	127139	2	19229	ENSMUST00000111121.1	0	ENSMUSG00000059456	PTK2 protein tyrosine kinase 2 beta
Fbln2	3.56559	1.03107	0.0454772	0.435611	Distal Intergenic	91198230	91198629	6	91212455	91272539	60085	1	14115	ENSMUST00000113498.8	-13826	ENSMUSG00000064080	fibulin 2
Pde11a	3.46498	-1.19551	0.0454811	0.435611	Intron (ENSMUST00000099992.9/241489, intron 15 of 19)	76032049	76032448	2	75989141	76006043	16903	2	241489	ENSMUST00000124825.1	-26006	ENSMUSG00000075270	phosphodiesterase 11A
Tet1	3.90134	-0.842532	0.0455001	0.435611	Promoter (<=1kb)	62886496	62886895	10	62879873	62887324	7452	2	52463	ENSMUST00000218438.1	429	ENSMUSG00000047146	tet methylcytosine dioxygenase 1
Pramel3	2.17081	2.29257	0.0455065	0.435611	Distal Intergenic	135280283	135280682	20	135302307	135312652	10346	1	83565	ENSMUST00000118821.7	-21625	ENSMUSG00000067360	PRAME like 3
Cox10	6.92732	-0.465799	0.0455703	0.435814	Intron (ENSMUST00000049091.8/70383, intron 3 of 6)	64047253	64047652	11	63962627	64079466	116840	2	70383	ENSMUST00000049091.8	31814	ENSMUSG00000042148	heme A:farnesyltransferase cytochrome c oxidase assembly factor 10
Gm8817	1.23562	2.84121	0.0457703	0.437128	Exon (ENSMUST00000197570.1/ENSMUST00000197570.1, exon 1 of 1)	166956847	166957246	20	167063552	167068389	4838	2	667794	ENSMUST00000171902.2	111143	ENSMUSG00000086008	predicted gene 8817
Vwa2	7.00404	-0.407331	0.0457931	0.437128	Promoter (<=1kb)	56874214	56874613	19	56874249	56912078	37830	1	240675	ENSMUST00000026068.7	0	ENSMUSG00000025082	von Willebrand factor A domain containing 2
Smad5	7.04043	-0.385368	0.0459225	0.437237	Exon (ENSMUST00000210744.1/ENSMUST00000210744.1, exon 1 of 1)	56753297	56753696	13	56733017	56738993	5977	1	17129	ENSMUST00000136702.1	20280	ENSMUSG00000021540	SMAD family member 5
Klhdc7a	3.86897	0.785264	0.0459568	0.437237	Distal Intergenic	140003858	140004257	4	139960220	139968026	7807	2	242721	ENSMUST00000105031.3	-35832	ENSMUSG00000078234	kelch domain containing 7A
Entpd7	4.39128	-0.721389	0.0459843	0.437237	Promoter (<=1kb)	43689512	43689911	19	43689672	43733697	44026	1	93685	ENSMUST00000081079.5	0	ENSMUSG00000025192	ectonucleoside triphosphate diphosphohydrolase 7
Armcx2	2.17014	2.29182	0.0462793	0.437237	Distal Intergenic	134841906	134842305	20	134804147	134809221	5075	2	67416	ENSMUST00000168264.1	-32685	ENSMUSG00000033436	armadillo repeat containing, X-linked 2
Chrdl1	2.17014	2.29182	0.0462793	0.437237	Promoter (<=1kb)	143392680	143393079	20	143297176	143393896	96721	2	83453	ENSMUST00000166406.2	817	ENSMUSG00000031283	chordin-like 1
Rps6ka3	2.17014	2.29182	0.0462793	0.437237	Promoter (3-4kb)	159214001	159214400	20	159210307	159364502	154196	1	110651	ENSMUST00000112493.7	3694	ENSMUSG00000031309	ribosomal protein S6 kinase polypeptide 3
Tmem164	2.56818	2.22184	0.0462945	0.437237	Intron (ENSMUST00000112889.7/209497, intron 2 of 6)	142756391	142756790	20	142770993	142843494	72502	1	209497	ENSMUST00000151914.1	-14203	ENSMUSG00000047045	transmembrane protein 164
Frmpd4	0.722519	2.85336	0.0463151	0.437237	Intron (ENSMUST00000112147.8/333605, intron 3 of 19)	168394800	168395199	20	167473973	168448042	974070	2	333605	ENSMUST00000238709.1	52843	ENSMUSG00000049176	FERM and PDZ domain containing 4
Efs	2.99936	1.29001	0.0463515	0.437237	Promoter (<=1kb)	54926161	54926560	14	54916633	54926126	9494	2	13644	ENSMUST00000227037.1	-35	ENSMUSG00000022203	embryonal Fyn-associated substrate
Adgrb1	2.08758	1.8439	0.0463671	0.437237	Promoter (<=1kb)	74563578	74563977	15	74563792	74589464	25673	1	107831	ENSMUST00000185682.6	0	ENSMUSG00000034730	adhesion G protein-coupled receptor B1
Phf8	1.63509	2.45674	0.0463791	0.437237	Promoter (1-2kb)	151631561	151631960	20	151629817	151633859	4043	1	320595	ENSMUST00000138318.1	1744	ENSMUSG00000041229	PHD finger protein 8
Cplx3	3.30575	-1.23271	0.0464332	0.437237	Promoter (<=1kb)	57605751	57606150	9	57602124	57606236	4113	2	235415	ENSMUST00000215487.1	86	ENSMUSG00000039714	complexin 3
Frmpd4	2.39865	2.16682	0.0465032	0.437237	Intron (ENSMUST00000112147.8/333605, intron 2 of 19)	168523719	168524118	20	167471309	168577231	1105923	2	333605	ENSMUST00000112147.8	53113	ENSMUSG00000049176	FERM and PDZ domain containing 4
Ppef1	1.66714	2.50117	0.0465071	0.437237	Promoter (2-3kb)	160733112	160733511	20	160641864	160735765	93902	2	237178	ENSMUST00000135856.1	2254	ENSMUSG00000062168	protein phosphatase with EF hand calcium-binding domain 1
Slc41a2	4.52723	-0.637745	0.0465301	0.437237	Promoter (<=1kb)	83337028	83337427	10	83316342	83337440	21099	2	338365	ENSMUST00000126617.1	13	ENSMUSG00000034591	solute carrier family 41, member 2
Nfia	4.13739	0.648908	0.0465528	0.437237	Promoter (<=1kb)	97777669	97778068	4	97777803	98118871	341069	1	18027	ENSMUST00000107062.8	0	ENSMUSG00000028565	nuclear factor I/A
Tmem102	6.10019	0.491485	0.0466015	0.437237	Promoter (1-2kb)	69803659	69804058	11	69803603	69805624	2022	2	380705	ENSMUST00000051025.4	1566	ENSMUSG00000089876	transmembrane protein 102
Irs4	2.26725	2.01324	0.0466017	0.437237	Distal Intergenic	141950982	141951381	20	141710998	141725263	14266	2	16370	ENSMUST00000067841.7	-225719	ENSMUSG00000054667	insulin receptor substrate 4
Shroom2	2.76685	2.00346	0.0466375	0.437237	Intron (ENSMUST00000101141.8/110380, intron 4 of 9)	152657991	152658390	20	152609992	152644543	34552	2	110380	ENSMUST00000137217.7	-13448	ENSMUSG00000045180	shroom family member 2
Col4a5	2.28618	2.21971	0.0466772	0.437237	Promoter (1-2kb)	141659931	141660330	20	141658350	141675732	17383	1	12830	ENSMUST00000128669.1	1581	ENSMUSG00000031274	collagen, type IV, alpha 5
Gal3st1	6.43405	-0.585591	0.0467344	0.437237	Exon (ENSMUST00000078757.7/53897, exon 3 of 3)	3998008	3998407	11	3989933	3999308	9376	1	53897	ENSMUST00000109981.1	8075	ENSMUSG00000049721	galactose-3-O-sulfotransferase 1
Fam98a	0.804548	-4.37277	0.0467446	0.437237	Distal Intergenic	75645493	75645892	17	75537086	75551946	14861	2	72722	ENSMUST00000112507.3	-93547	ENSMUSG00000002017	family with sequence similarity 98, member A
Pantr1	2.53297	1.58098	0.0468107	0.437455	Exon (ENSMUST00000191992.1/ENSMUST00000191992.1, exon 2 of 3)	42493274	42493673	1	42648200	42651679	3480	2	66297	ENSMUST00000176977.7	158006	ENSMUSG00000060424	POU domain, class 3, transcription factor 3 adjacent noncoding transcript 1
Tlr7	2.03295	2.36262	0.0470029	0.438851	Downstream (1-2kb)	167302951	167303350	20	167317680	167330443	12764	2	170743	ENSMUST00000149507.1	27093	ENSMUSG00000044583	toll-like receptor 7
Fgf15	5.50593	-0.628826	0.0470997	0.439354	Promoter (<=1kb)	144896656	144897055	7	144896564	144899881	3318	1	14170	ENSMUST00000207229.1	92	ENSMUSG00000031073	fibroblast growth factor 15
Tns1	4.11588	0.67539	0.0472194	0.440069	Promoter (1-2kb)	74098794	74099193	1	73997055	74096868	99814	2	21961	ENSMUST00000188208.1	-1926	ENSMUSG00000055322	tensin 1
Tubb3	3.13321	1.11683	0.0472681	0.440122	Promoter (<=1kb)	123411653	123412052	8	123411590	123421094	9505	1	22152	ENSMUST00000212743.1	63	ENSMUSG00000062380	tubulin, beta 3 class III
Gm14858	1.99262	2.30419	0.0473311	0.440308	Intron (ENSMUST00000144761.7/434825, intron 3 of 3)	102346377	102346776	20	102252651	102257689	5039	1	434825	ENSMUST00000138614.1	93726	ENSMUSG00000085568	predicted gene 14858
Vwa1	4.05172	-0.716628	0.0474603	0.441109	Promoter (<=1kb)	155774395	155774794	4	155768149	155774698	6550	2	246228	ENSMUST00000042196.3	0	ENSMUSG00000042116	von Willebrand factor A domain containing 1
B230119M05Rik	3.04207	1.80584	0.047554	0.441579	Distal Intergenic	134661252	134661651	20	134684562	134686462	1901	2	77983	ENSMUST00000154072.1	24811	ENSMUSG00000087024	RIKEN cDNA B230119M05 gene
Capn1	5.07007	-0.580084	0.0476428	0.442003	Promoter (<=1kb)	6015517	6015916	19	5988546	6015825	27280	2	12333	ENSMUST00000164843.7	0	ENSMUSG00000024942	calpain 1
Pde3a	4.91218	-0.590208	0.0477412	0.442237	Promoter (<=1kb)	141249860	141250259	6	141249966	141471596	221631	1	54611	ENSMUST00000189060.2	0	ENSMUSG00000041741	phosphodiesterase 3A, cGMP inhibited
Atp2b4	3.62151	-0.94217	0.0477545	0.442237	Promoter (<=1kb)	133800870	133801269	1	133699457	133801041	101585	2	381290	ENSMUST00000143567.7	0	ENSMUSG00000026463	ATPase, Ca++ transporting, plasma membrane 4
Wnt2b	7.76695	-0.38907	0.0478468	0.442691	Promoter (<=1kb)	104961189	104961588	3	104945272	104961921	16650	2	22414	ENSMUST00000029429.5	333	ENSMUSG00000027840	wingless-type MMTV integration site family, member 2B
Slc43a1	5.85623	-0.556835	0.0479141	0.442754	Promoter (<=1kb)	84839518	84839917	2	84839417	84862388	22972	1	72401	ENSMUST00000145004.1	101	ENSMUSG00000027075	solute carrier family 43, member 1
Sidt1	5.33725	-0.617181	0.0479962	0.442754	Promoter (<=1kb)	44332354	44332753	16	44284250	44332541	48292	2	320007	ENSMUST00000124651.1	0	ENSMUSG00000022696	SID1 transmembrane family, member 1
Bex3	3.79892	0.881376	0.0480481	0.442754	Exon (ENSMUST00000083785.1/ENSMUST00000083785.1, exon 1 of 1)	136277600	136277999	20	136270775	136271920	1146	1	12070	ENSMUST00000113113.1	6825	ENSMUSG00000046432	brain expressed X-linked 3
Zfp36l2	5.33439	-0.619936	0.0480648	0.442754	Promoter (1-2kb)	84186521	84186920	17	84183931	84187947	4017	2	12193	ENSMUST00000060366.6	1027	ENSMUSG00000045817	zinc finger protein 36, C3H type-like 2
Arid3c	5.93552	-0.520753	0.04807	0.442754	Promoter (1-2kb)	41728265	41728664	4	41724139	41730286	6148	2	550619	ENSMUST00000084698.11	1622	ENSMUSG00000066224	AT rich interactive domain 3C (BRIGHT-like)
Ppp2r2c	7.82949	-0.397955	0.0481698	0.443275	Promoter (<=1kb)	36869637	36870036	5	36868663	36931257	62595	1	269643	ENSMUST00000201156.1	974	ENSMUSG00000029120	protein phosphatase 2, regulatory subunit B, gamma
Phka2	1.71092	2.56125	0.0482441	0.443446	Intron (ENSMUST00000112377.7/110094, intron 2 of 33)	160511512	160511911	20	160502465	160558955	56491	1	110094	ENSMUST00000112376.1	9047	ENSMUSG00000031295	phosphorylase kinase alpha 2
8030474K03Rik	2.41478	2.19144	0.0483147	0.443446	Distal Intergenic	101819161	101819560	20	101794686	101798640	3955	1	382231	ENSMUST00000149761.1	24475	ENSMUSG00000046774	RIKEN cDNA 8030474K03 gene
Lad1	7.18493	-0.417301	0.0483184	0.443446	Promoter (<=1kb)	135818800	135819199	1	135818598	135833342	14745	1	16763	ENSMUST00000038760.9	202	ENSMUSG00000041782	ladinin
9230105E05Rik	2.18294	-2.22983	0.0484267	0.444041	Intron (ENSMUST00000072777.13/15364, intron 3 of 4)	120406168	120406567	10	120389523	120392793	3271	1	320626	ENSMUST00000161291.1	16645	ENSMUSG00000090191	RIKEN cDNA 9230105E05 gene
Jsrp1	5.563	-0.559202	0.0484853	0.444095	Promoter (2-3kb)	80808804	80809203	10	80808496	80811885	3390	2	71912	ENSMUST00000020435.10	2682	ENSMUSG00000020216	junctional sarcoplasmic reticulum protein 1
Lrrc4b	3.4131	1.08769	0.0485193	0.444095	Promoter (<=1kb)	44441955	44442354	7	44442485	44463351	20867	1	272381	ENSMUST00000058667.14	-131	ENSMUSG00000047085	leucine rich repeat containing 4B
Tmem164	1.97631	2.28036	0.0485752	0.444209	Intron (ENSMUST00000041317.2/56068, intron 2 of 5)	142891851	142892250	20	142825741	142838238	12498	1	209497	ENSMUST00000112888.1	66110	ENSMUSG00000047045	transmembrane protein 164
Gm15246	2.2894	2.22449	0.0487168	0.444823	Distal Intergenic	169479193	169479592	20	169320622	169368190	47569	1	101055907	ENSMUST00000149873.1	158571	ENSMUSG00000087159	predicted gene 15246
Nxf2	2.17431	2.29768	0.0488248	0.444823	Promoter (<=1kb)	134955538	134955937	20	134944526	134956350	11825	2	83454	ENSMUST00000143059.1	413	ENSMUSG00000009941	nuclear RNA export factor 2
Arhgap6	3.75448	1.7197	0.0488639	0.444823	Exon (ENSMUST00000136779.1/ENSMUST00000136779.1, exon 1 of 4)	169106185	169106584	20	169113047	169304435	191389	1	11856	ENSMUST00000112127.1	-6463	ENSMUSG00000031355	Rho GTPase activating protein 6
Ccdc61	3.49494	0.929852	0.0488983	0.444823	Promoter (<=1kb)	18893425	18893824	7	18891005	18893959	2955	2	232933	ENSMUST00000206499.1	135	ENSMUSG00000074358	coiled-coil domain containing 61
Gadd45g	6.61288	0.463079	0.0489089	0.444823	Distal Intergenic	51917461	51917860	13	51846744	51848224	1481	1	23882	ENSMUST00000132480.1	70717	ENSMUSG00000021453	growth arrest and DNA-damage-inducible 45 gamma
Abcb7	1.51891	2.7114	0.04894	0.444823	Intron (ENSMUST00000033695.5/11306, intron 1 of 15)	104380111	104380510	20	104280657	104413846	133190	2	11306	ENSMUST00000033695.5	33336	ENSMUSG00000031333	ATP-binding cassette, sub-family B (MDR/TAP), member 7
Cavin4	2.91151	-1.70135	0.0489466	0.444823	Distal Intergenic	48736943	48737342	4	48663514	48673502	9989	1	68016	ENSMUST00000030033.4	73429	ENSMUSG00000028348	caveolae associated 4
H2al1j	2.03408	1.81378	0.0490728	0.444927	Distal Intergenic	11552015	11552414	20	11327822	11328151	330	1	236663	ENSMUST00000091180.2	224193	ENSMUSG00000069038	H2A histone family member L1J
Nox1	1.09694	2.66129	0.049165	0.444927	Promoter (2-3kb)	134139819	134140218	20	134107733	134137711	29979	2	237038	ENSMUST00000159231.2	-2108	ENSMUSG00000031257	NADPH oxidase 1
Grpr	1.09694	2.66129	0.049165	0.444927	Distal Intergenic	163384113	163384512	20	163513904	163549677	35774	2	14829	ENSMUST00000033730.2	165165	ENSMUSG00000031364	gastrin releasing peptide receptor
Ripor2	4.56467	-0.641483	0.0492902	0.444927	Promoter (<=1kb)	24638923	24639322	13	24638713	24695725	57013	1	193385	ENSMUST00000138547.7	210	ENSMUSG00000036006	RHO family interacting cell polarization regulator 2
Ghsr	7.30863	-0.48394	0.0493801	0.444927	Promoter (<=1kb)	27371996	27372395	3	27371351	27378010	6660	1	208188	ENSMUST00000057186.1	645	ENSMUSG00000051136	growth hormone secretagogue receptor
Tef	3.47679	0.870573	0.0493901	0.444927	Promoter (<=1kb)	81811170	81811569	15	81811414	81826698	15285	1	21685	ENSMUST00000023024.7	0	ENSMUSG00000022389	thyrotroph embryonic factor
Rbm47	6.13896	-0.561773	0.0493975	0.444927	Promoter (<=1kb)	66151140	66151539	5	66027240	66151323	124084	2	245945	ENSMUST00000201561.3	0	ENSMUSG00000070780	RNA binding motif protein 47
Auts2	3.0707	-1.3726	0.0494773	0.444927	Promoter (<=1kb)	131616452	131616851	5	131437788	131616605	178818	2	319974	ENSMUST00000161804.7	0	ENSMUSG00000029673	autism susceptibility candidate 2
Smpx	0.705061	2.83147	0.0494884	0.444927	Promoter (<=1kb)	157719287	157719686	20	157720426	157752283	31858	1	66106	ENSMUST00000126418.1	-740	ENSMUSG00000041476	small muscle protein, X-linked
Tll2	4.18702	1.01522	0.0494951	0.444927	Intron (ENSMUST00000025986.14/24087, intron 1 of 20)	41188893	41189292	19	41083981	41206774	122794	2	24087	ENSMUST00000169941.1	17482	ENSMUSG00000025013	tolloid-like 2
Slc16a2	8.51704	2.30121	0.0495062	0.444927	Downstream (2-3kb)	103694835	103695234	20	103699851	103706454	6604	2	20502	ENSMUST00000171837.1	11220	ENSMUSG00000033965	solute carrier family 16 (monocarboxylic acid transporters), member 2
Myof	6.57174	0.391406	0.0495368	0.444927	Distal Intergenic	37878546	37878945	19	37899468	37901503	2036	2	226101	ENSMUST00000225435.1	22558	ENSMUSG00000048612	myoferlin
Lepr	5.57602	-0.587162	0.049563	0.444927	Promoter (<=1kb)	101717291	101717690	4	101717404	101792258	74855	1	16847	ENSMUST00000102777.9	0	ENSMUSG00000057722	leptin receptor
Cdkl5	2.40251	2.17244	0.0496077	0.444927	Intron (ENSMUST00000087104.10/382253, intron 1 of 18)	160938373	160938772	20	160771923	160928521	156599	2	382253	ENSMUST00000197942.4	-9852	ENSMUSG00000031292	cyclin-dependent kinase-like 5
Lamc3	6.66174	-0.473395	0.0496932	0.444927	Promoter (<=1kb)	31887080	31887479	2	31887291	31945246	57956	1	23928	ENSMUST00000138325.7	0	ENSMUSG00000026840	laminin gamma 3
Rcn1	3.44264	0.904844	0.0497499	0.444927	Distal Intergenic	105516467	105516866	2	105386291	105399319	13029	2	19672	ENSMUST00000006128.6	-117148	ENSMUSG00000005973	reticulocalbin 1
Gna14	5.30914	-0.611979	0.0497659	0.444927	Promoter (<=1kb)	16435924	16436323	19	16435762	16610820	175059	1	14675	ENSMUST00000025602.3	162	ENSMUSG00000024697	guanine nucleotide binding protein, alpha 14
Tmem132c	5.94252	-0.5683	0.0497905	0.444927	Promoter (1-2kb)	127243088	127243487	5	127241826	127287336	45511	1	208213	ENSMUST00000134780.1	1262	ENSMUSG00000034324	transmembrane protein 132C
Ddx39a	3.15227	-1.2355	0.0498229	0.444927	Promoter (<=1kb)	83715012	83715411	8	83715177	83723348	8172	1	68278	ENSMUST00000019576.14	0	ENSMUSG00000005481	DEAD box helicase 39a
Upp2	3.8243	0.724945	0.0498599	0.444927	Intron (ENSMUST00000135737.1/76654, intron 1 of 1)	58626739	58627138	2	58567387	58792971	225585	1	76654	ENSMUST00000071543.11	59352	ENSMUSG00000026839	uridine phosphorylase 2
Tsc22d3	4.13291	1.75711	0.0498967	0.444927	Promoter (<=1kb)	140542525	140542924	20	140539528	140542668	3141	2	14605	ENSMUST00000112995.2	0	ENSMUSG00000031431	TSC22 domain family, member 3
Sh3kbp1	2.41824	2.19608	0.0499146	0.444927	Intron (ENSMUST00000112456.8/58194, intron 1 of 17)	159650208	159650607	20	159627541	159973169	345629	1	58194	ENSMUST00000073094.9	22667	ENSMUSG00000040990	SH3-domain kinase binding protein 1
Hif3a	3.71793	0.800457	0.0500025	0.445158	Promoter (<=1kb)	17062332	17062731	7	17031507	17062427	30921	2	53417	ENSMUST00000108492.8	0	ENSMUSG00000004328	hypoxia inducible factor 3, alpha subunit
Adamts9	2.19302	-2.29644	0.050035	0.445158	Intron (ENSMUST00000113438.7/101401, intron 38 of 39)	92785919	92786318	6	92793010	92860145	67136	2	101401	ENSMUST00000125490.7	73827	ENSMUSG00000030022	a disintegrin-like and metallopeptidase (reprolysin type) with thrombospondin type 1 motif, 9
Ptprn	5.54753	-0.573728	0.0500908	0.445158	Promoter (<=1kb)	75263481	75263880	1	75258491	75263907	5417	2	19275	ENSMUST00000186178.6	27	ENSMUSG00000026204	protein tyrosine phosphatase, receptor type, N
1700113A16Rik	3.66995	0.902383	0.0501145	0.445158	Promoter (<=1kb)	88177823	88178222	3	88171556	88177785	6230	2	76642	ENSMUST00000181837.2	-38	ENSMUSG00000096935	RIKEN cDNA 1700113A16 gene
Nans	3.5932	0.80244	0.0503269	0.446641	Exon (ENSMUST00000046897.12/74735, exon 6 of 6)	46506676	46507075	4	46489985	46500745	10761	1	94181	ENSMUST00000137874.1	16691	ENSMUSG00000028334	N-acetylneuraminic acid synthase (sialic acid synthase)
4930441J16Rik	0.831137	-4.39716	0.0505198	0.446641	Intron (ENSMUST00000153743.1/73962, intron 4 of 4)	74299365	74299764	2	74298940	74307717	8778	2	73962	ENSMUST00000153743.1	7953	ENSMUSG00000085405	RIKEN cDNA 4930441J16 gene
Lman1	7.66353	0.453258	0.0505228	0.446641	Promoter (4-5kb)	66026957	66027356	18	65993138	66022580	29443	2	70361	ENSMUST00000143990.1	-4377	ENSMUSG00000041891	lectin, mannose-binding, 1
Neurl1a	5.9004	-0.49379	0.0505246	0.446641	Promoter (<=1kb)	47179577	47179976	19	47179151	47241396	62246	1	18011	ENSMUST00000235290.1	426	ENSMUSG00000006435	neuralized E3 ubiquitin protein ligase 1A
A930009A15Rik	3.41781	1.00223	0.0506085	0.446641	Promoter (<=1kb)	115570000	115570399	10	115569986	115582448	12463	1	77798	ENSMUST00000173620.1	14	ENSMUSG00000092210	RIKEN cDNA A930009A15 gene
4833411C07Rik	1.68876	1.95154	0.0507059	0.446641	Promoter (2-3kb)	10902135	10902534	8	10899937	10903893	3957	1	71624	ENSMUST00000207914.1	2198	ENSMUSG00000109089	RIKEN cDNA 4833411C07 gene
Hdac8	2.1193	2.21676	0.0507908	0.446641	Intron (ENSMUST00000087916.10/70315, intron 4 of 10)	102474518	102474917	20	102498156	102504741	6586	2	70315	ENSMUST00000154024.1	29824	ENSMUSG00000067567	histone deacetylase 8
Gm1720	2.10888	2.00337	0.0508131	0.446641	Distal Intergenic	166716738	166717137	20	166662025	166689812	27788	1	382255	ENSMUST00000135086.1	54713	ENSMUSG00000086860	predicted gene 1720
Chst15	2.26919	1.61691	0.0508905	0.446641	Exon (ENSMUST00000077472.9/77590, exon 6 of 8)	132247609	132248008	7	132270819	132278625	7807	2	77590	ENSMUST00000132508.1	30617	ENSMUSG00000030930	carbohydrate sulfotransferase 15
Ace2	2.38626	2.14807	0.0509445	0.446641	Intron (ENSMUST00000112271.9/70008, intron 2 of 18)	164150955	164151354	20	164140478	164188420	47943	1	70008	ENSMUST00000073973.10	10477	ENSMUSG00000015405	angiotensin I converting enzyme (peptidyl-dipeptidase A) 2
Zcchc24	4.12545	-0.709193	0.0510587	0.446641	Promoter (<=1kb)	25768309	25768708	14	25711642	25769039	57398	2	71918	ENSMUST00000069180.7	331	ENSMUSG00000055538	zinc finger, CCHC domain containing 24
Bbs9	1.69573	-2.70372	0.0510661	0.446641	Intron (ENSMUST00000039798.15/319845, intron 20 of 21)	22829641	22830040	9	22678750	22888274	209525	1	319845	ENSMUST00000124076.1	150891	ENSMUSG00000035919	Bardet-Biedl syndrome 9 (human)
Abhd8	3.67669	0.773312	0.0510697	0.446641	Promoter (<=1kb)	71463505	71463904	8	71456705	71463655	6951	2	64296	ENSMUST00000008094.9	0	ENSMUSG00000007950	abhydrolase domain containing 8
Plcg2	5.7552	-0.529609	0.0511447	0.446641	Promoter (<=1kb)	117498374	117498773	8	117498291	117635142	136852	1	234779	ENSMUST00000081232.8	83	ENSMUSG00000034330	phospholipase C, gamma 2
Inpp5a	2.39813	1.4845	0.051158	0.446641	Promoter (4-5kb)	139528197	139528596	7	139523858	139575209	51352	1	212111	ENSMUST00000152475.1	4339	ENSMUSG00000025477	inositol polyphosphate-5-phosphatase A
Tescl	0.777589	-4.34815	0.0511682	0.446641	Promoter (<=1kb)	24333893	24334292	7	24333082	24333936	855	2	69301	ENSMUST00000069562.5	0	ENSMUSG00000055826	tescalcin-like
Dct	0.639693	-4.22315	0.05122	0.446641	Promoter (<=1kb)	118052204	118052603	14	118024776	118052244	27469	2	13190	ENSMUST00000228548.1	0	ENSMUSG00000022129	dopachrome tautomerase
Tmem164	2.5843	2.05787	0.051237	0.446641	Distal Intergenic	142846625	142847024	20	142825741	142838238	12498	1	209497	ENSMUST00000112888.1	20884	ENSMUSG00000047045	transmembrane protein 164
Gm1720	2.76019	1.99287	0.0512604	0.446641	Promoter (2-3kb)	166664709	166665108	20	166662025	166689812	27788	1	382255	ENSMUST00000135086.1	2684	ENSMUSG00000086860	predicted gene 1720
Loxl1	6.3894	-0.495197	0.0512699	0.446641	Promoter (<=1kb)	58312419	58312818	9	58287738	58313186	25449	2	16949	ENSMUST00000061799.9	368	ENSMUSG00000032334	lysyl oxidase-like 1
Mir98	3.8849	1.72543	0.0512802	0.446641	Promoter (3-4kb)	151916599	151916998	20	151913214	151913321	108	1	723947	ENSMUST00000083602.2	3385	ENSMUSG00000065536	microRNA 98
Slc16a6	4.50689	-0.612209	0.0513607	0.446641	Promoter (<=1kb)	109472060	109472459	11	109459799	109472688	12890	2	104681	ENSMUST00000168740.2	229	ENSMUSG00000041920	solute carrier family 16 (monocarboxylic acid transporters), member 6
Gm33619	0.738326	-4.31029	0.0514541	0.446641	Promoter (3-4kb)	21178382	21178781	10	21182695	21188620	5926	1	102636600	ENSMUST00000215633.1	-3914	ENSMUSG00000111005	predicted gene, 33619
Enox1	0.738326	-4.31029	0.0514541	0.446641	Intron (ENSMUST00000022589.8/239188, intron 14 of 18)	77650576	77650975	14	77572856	77579274	6419	1	239188	ENSMUST00000228845.1	77720	ENSMUSG00000022012	ecto-NOX disulfide-thiol exchanger 1
Emid1	4.25897	-1.00085	0.0514844	0.446641	Promoter (<=1kb)	5151662	5152061	11	5131975	5152237	20263	2	140703	ENSMUST00000156492.1	176	ENSMUSG00000034164	EMI domain containing 1
Pard3b	2.16094	-2.22306	0.0515354	0.446641	Promoter (<=1kb)	61638864	61639263	1	61638875	61769859	130985	1	72823	ENSMUST00000129030.1	0	ENSMUSG00000052062	par-3 family cell polarity regulator beta
Zdbf2	2.53127	1.39641	0.0515377	0.446641	Promoter (3-4kb)	63204226	63204625	1	63200708	63207967	7260	1	73884	ENSMUST00000189722.1	3518	ENSMUSG00000027520	zinc finger, DBF-type containing 2
Nostrin	1.79389	-2.80513	0.0516022	0.446641	Intron (ENSMUST00000028426.8/241447, intron 8 of 9)	69088548	69088947	2	69135800	69189330	53531	1	329416	ENSMUST00000041865.7	-46853	ENSMUSG00000034738	nitric oxide synthase trafficker
Zrsr2	2.65912	1.99798	0.0518067	0.446641	Promoter (4-5kb)	163938841	163939240	20	163939968	163943476	3509	2	22184	ENSMUST00000145962.1	4236	ENSMUSG00000031370	zinc finger (CCCH type), RNA binding motif and serine/arginine rich 2
9130227L01Rik	3.46598	-1.05137	0.0518512	0.446641	Distal Intergenic	55897261	55897660	1	55931241	55972098	40858	1	329159	ENSMUST00000189293.1	-33581	ENSMUSG00000099950	RIKEN cDNA 9130227L01 gene
Esx1	7.37011	0.397486	0.0519816	0.446641	Exon (ENSMUST00000118843.1/ENSMUST00000118843.1, exon 1 of 1)	137112530	137112929	20	137115397	137120171	4775	2	13984	ENSMUST00000113066.8	7242	ENSMUSG00000023443	extraembryonic, spermatogenesis, homeobox 1
Arhgap6	0.384369	3.41389	0.0520309	0.446641	Intron (ENSMUST00000033721.12/11856, intron 1 of 12)	168843575	168843974	20	168795099	169304435	509337	1	11856	ENSMUST00000033721.12	48476	ENSMUSG00000031355	Rho GTPase activating protein 6
Egfl6	1.42505	2.58548	0.0520824	0.446641	Distal Intergenic	166605785	166606184	20	166523007	166585720	62714	2	54156	ENSMUST00000000412.2	-20065	ENSMUSG00000000402	EGF-like-domain, multiple 6
Grpr	1.64917	2.47642	0.0521104	0.446641	Distal Intergenic	163573105	163573504	20	163513904	163549677	35774	2	14829	ENSMUST00000033730.2	-23428	ENSMUSG00000031364	gastrin releasing peptide receptor
Crip2	1.53908	1.98047	0.052142	0.446641	Promoter (<=1kb)	113142027	113142426	12	113142808	113145130	2323	1	68337	ENSMUST00000196015.4	-382	ENSMUSG00000006356	cysteine rich protein 2
Kcp	6.99076	-0.425483	0.0521478	0.446641	Promoter (<=1kb)	29496382	29496781	6	29482036	29495914	13879	2	333088	ENSMUST00000159479.7	-468	ENSMUSG00000059022	kielin/chordin-like protein
AI593442	6.63634	-0.405322	0.0521728	0.446641	Promoter (<=1kb)	52678108	52678507	9	52673044	52679429	6386	2	330941	ENSMUST00000098768.2	922	ENSMUSG00000078307	expressed sequence AI593442
Epcam	6.26983	-0.542004	0.0522301	0.446641	Promoter (<=1kb)	87636783	87637182	17	87636682	87651129	14448	1	17075	ENSMUST00000234623.1	101	ENSMUSG00000045394	epithelial cell adhesion molecule
Odf3l1	4.10935	-0.778748	0.0522372	0.446641	Distal Intergenic	56825429	56825828	9	56848659	56851963	3305	2	382075	ENSMUST00000055036.6	26135	ENSMUSG00000045620	outer dense fiber of sperm tails 3-like 1
Tle4	2.86906	-1.68616	0.052291	0.446641	Distal Intergenic	14443392	14443791	19	14543726	14595539	51814	2	21888	ENSMUST00000235975.1	151748	ENSMUSG00000024642	transducin-like enhancer of split 4
Huwe1	2.81938	1.93099	0.0523123	0.446641	Promoter (1-2kb)	151833618	151834017	20	151835248	151935417	100170	1	59026	ENSMUST00000112622.7	-1231	ENSMUSG00000025261	HECT, UBA and WWE domain containing 1
Reps2	2.67374	1.88855	0.0523416	0.446641	Intron (ENSMUST00000154424.7/194590, intron 12 of 15)	162443545	162443944	20	162546220	162552579	6360	2	194590	ENSMUST00000155043.1	108635	ENSMUSG00000040855	RALBP1 associated Eps domain containing protein 2
Olfml2a	3.47512	-1.21163	0.0523419	0.446641	Promoter (<=1kb)	38931821	38932220	2	38931978	38963753	31776	1	241327	ENSMUST00000057279.5	0	ENSMUSG00000046618	olfactomedin-like 2A
H6pd	7.90896	-0.422352	0.0523506	0.446641	Distal Intergenic	150033020	150033419	4	149979475	150009023	29549	2	100198	ENSMUST00000030830.3	-23997	ENSMUSG00000028980	hexose-6-phosphate dehydrogenase (glucose 1-dehydrogenase)
Phactr3	2.81994	-1.93335	0.0523886	0.446641	Intron (ENSMUST00000108917.7/74189, intron 1 of 12)	178255422	178255821	2	178193084	178336491	143408	1	74189	ENSMUST00000103065.1	62338	ENSMUSG00000027525	phosphatase and actin regulator 3
Slc39a11	1.66375	-2.66882	0.0524317	0.446641	Intron (ENSMUST00000071539.9/69806, intron 5 of 9)	113428465	113428864	11	113244853	113565756	320904	2	69806	ENSMUST00000071539.9	136892	ENSMUSG00000041654	solute carrier family 39 (metal ion transporter), member 11
Frmpd4	2.11512	2.21049	0.0525232	0.446641	Intron (ENSMUST00000112147.8/333605, intron 3 of 19)	168101460	168101859	20	167473973	168122826	648854	2	333605	ENSMUST00000112146.8	20967	ENSMUSG00000049176	FERM and PDZ domain containing 4
Gm11217	3.12413	-1.36389	0.0525372	0.446641	Distal Intergenic	64310165	64310564	4	64254053	64276603	22551	2	102633436	ENSMUST00000141162.1	-33562	ENSMUSG00000085032	predicted gene 11217
Atrx	1.81685	2.35892	0.052586	0.446641	Promoter (4-5kb)	105820970	105821369	20	105818070	105826125	8056	2	22589	ENSMUST00000127221.7	4756	ENSMUSG00000031229	ATRX, chromatin remodeler
Pdha1	2.46527	2.06332	0.0525887	0.446641	Intron (ENSMUST00000033665.8/270672, intron 9 of 28)	160076292	160076691	20	160127291	160128965	1675	2	18597	ENSMUST00000156531.1	52274	ENSMUSG00000031299	pyruvate dehydrogenase E1 alpha 1
9630013K17Rik	4.34978	-0.789482	0.0525947	0.446641	Distal Intergenic	63951529	63951928	11	63964226	63968040	3815	1	78883	ENSMUST00000146915.1	-12298	ENSMUSG00000086359	RIKEN cDNA 9630013K17 gene
Arhgap6	1.35552	2.49089	0.0526094	0.446641	Intron (ENSMUST00000033721.12/11856, intron 1 of 12)	168979440	168979839	20	169036611	169251527	214917	1	11856	ENSMUST00000143048.1	-56772	ENSMUSG00000031355	Rho GTPase activating protein 6
Drp2	1.41309	2.56936	0.0526132	0.446641	Promoter (<=1kb)	134404911	134405310	20	134404802	134453007	48206	1	13497	ENSMUST00000113226.1	109	ENSMUSG00000000223	dystrophin related protein 2
Itga3	5.1011	-0.572658	0.0526806	0.446641	Promoter (<=1kb)	95076636	95077035	11	95044474	95076714	32241	2	16400	ENSMUST00000001548.13	0	ENSMUSG00000001507	integrin alpha 3
Gpr101	4.73317	-0.616036	0.052682	0.446641	Promoter (<=1kb)	57503529	57503928	20	57496668	57503757	7090	2	245424	ENSMUST00000057645.5	0	ENSMUSG00000036357	G protein-coupled receptor 101
Prdm16	7.34104	0.586122	0.0527692	0.447009	Promoter (2-3kb)	154638971	154639370	4	154355277	154636873	281597	2	70673	ENSMUST00000124771.1	-2098	ENSMUSG00000039410	PR domain containing 16
Frmpd4	2.11119	2.20469	0.0532313	0.450481	Intron (ENSMUST00000112147.8/333605, intron 3 of 19)	168332929	168333328	20	167473973	168448042	974070	2	333605	ENSMUST00000238709.1	114714	ENSMUSG00000049176	FERM and PDZ domain containing 4
Cpeb2	2.8783	1.11215	0.053267	0.450481	Promoter (<=1kb)	43232666	43233065	5	43233170	43289723	56554	1	231207	ENSMUST00000166713.8	-105	ENSMUSG00000039782	cytoplasmic polyadenylation element binding protein 2
Phka1	2.35136	2.09464	0.0534386	0.451384	Intron (ENSMUST00000043596.11/18679, intron 8 of 31)	102614581	102614980	20	102513975	102644246	130272	2	18679	ENSMUST00000043596.11	29266	ENSMUSG00000034055	phosphorylase kinase alpha 1
Slc22a21	4.68333	-0.798982	0.0534621	0.451384	Promoter (<=1kb)	53979893	53980292	11	53957974	53979870	21897	2	56517	ENSMUST00000124221.7	-23	ENSMUSG00000063652	solute carrier family 22 (organic cation transporter), member 21
Tmem37	4.77115	-0.705722	0.0537127	0.453127	Promoter (<=1kb)	120073513	120073912	1	120067377	120074074	6698	2	170706	ENSMUST00000056089.7	162	ENSMUSG00000050777	transmembrane protein 37
Bcl2l11	7.32216	-0.403234	0.0538071	0.453548	Promoter (1-2kb)	128124399	128124798	2	128126038	128130015	3978	1	12125	ENSMUST00000146023.7	-1240	ENSMUSG00000027381	BCL2-like 11 (apoptosis facilitator)
Tbx5	3.53275	-0.994411	0.0540615	0.455318	Intron (ENSMUST00000018407.9/21388, intron 7 of 8)	119866824	119867223	5	119836155	119845110	8956	1	21388	ENSMUST00000202504.2	30669	ENSMUSG00000018263	T-box 5
Dlgap3	3.99951	0.663647	0.0542794	0.456482	Promoter (<=1kb)	127168316	127168715	4	127169204	127237022	67819	1	242667	ENSMUST00000046659.13	-489	ENSMUSG00000042388	DLG associated protein 3
Tmem28	2.40292	2.03636	0.0542949	0.456482	Distal Intergenic	99648225	99648624	20	99821021	99848790	27770	1	620592	ENSMUST00000096363.2	-172397	ENSMUSG00000071719	transmembrane protein 28
Frmpd4	1.84865	2.40407	0.0543828	0.456482	Intron (ENSMUST00000112147.8/333605, intron 3 of 19)	168263313	168263712	20	167475298	168124290	648993	2	333605	ENSMUST00000239138.1	-139023	ENSMUSG00000049176	FERM and PDZ domain containing 4
Kcnma1	5.31428	-0.534096	0.0544215	0.456482	Intron (ENSMUST00000172099.8/16531, intron 4 of 27)	23569243	23569642	14	23501125	23554798	53674	2	16531	ENSMUST00000212576.1	-14445	ENSMUSG00000063142	potassium large conductance calcium-activated channel, subfamily M, alpha member 1
Nt5e	3.50856	-1.26767	0.0545316	0.456482	Distal Intergenic	88052212	88052611	9	88327197	88372092	44896	1	23959	ENSMUST00000034992.7	-274586	ENSMUSG00000032420	5' nucleotidase, ecto
Ly6g6c	4.56781	-0.584771	0.0545466	0.456482	Promoter (<=1kb)	35065280	35065679	17	35065388	35069625	4238	1	68468	ENSMUST00000173207.7	0	ENSMUSG00000092586	lymphocyte antigen 6 complex, locus G6C
Hdac8	1.05535	2.60657	0.0545882	0.456482	Intron (ENSMUST00000043596.11/18679, intron 28 of 31)	102524921	102525320	20	102284639	102505359	220721	2	70315	ENSMUST00000087916.10	-19562	ENSMUSG00000067567	histone deacetylase 8
Reps2	1.05535	2.60657	0.0545882	0.456482	Intron (ENSMUST00000154424.7/194590, intron 12 of 15)	162468976	162469375	20	162546220	162552579	6360	2	194590	ENSMUST00000155043.1	83204	ENSMUSG00000040855	RALBP1 associated Eps domain containing protein 2
Slit3	6.28961	-0.437439	0.0546012	0.456482	Promoter (<=1kb)	35121703	35122102	11	35121224	35708507	587284	1	20564	ENSMUST00000069837.3	479	ENSMUSG00000056427	slit guidance ligand 3
Cplx2	2.87506	1.38333	0.0548293	0.457606	Promoter (<=1kb)	54371251	54371650	13	54371349	54383917	12569	1	12890	ENSMUST00000026985.8	0	ENSMUSG00000025867	complexin 2
Arhgef39	4.2679	-0.844779	0.0548856	0.457606	Promoter (<=1kb)	43508560	43508959	4	43504428	43508724	4297	2	230098	ENSMUST00000149817.7	0	ENSMUSG00000051517	Rho guanine nucleotide exchange factor (GEF) 39
C1qtnf4	5.49395	-0.648407	0.0549186	0.457606	Promoter (2-3kb)	90888185	90888584	2	90885860	90890525	4666	1	67445	ENSMUST00000111466.2	2325	ENSMUSG00000040794	C1q and tumor necrosis factor related protein 4
Hs3st2	7.11537	-0.47659	0.0549399	0.457606	Promoter (<=1kb)	121392662	121393061	7	121392290	121501770	109481	1	195646	ENSMUST00000084628.4	372	ENSMUSG00000046321	heparan sulfate (glucosamine) 3-O-sulfotransferase 2
Htr7	4.85016	-0.558088	0.0549592	0.457606	Promoter (<=1kb)	36056512	36056911	19	35958734	36057340	98607	2	15566	ENSMUST00000164639.7	429	ENSMUSG00000024798	5-hydroxytryptamine (serotonin) receptor 7
Zdhhc15	3.26404	1.59587	0.0551761	0.458819	Intron (ENSMUST00000042070.5/108672, intron 2 of 11)	104617563	104617962	20	104536969	104671064	134096	2	108672	ENSMUST00000042070.5	53102	ENSMUSG00000033906	zinc finger, DHHC domain containing 15
Mtx2	3.32064	-1.24771	0.0551946	0.458819	Distal Intergenic	74906769	74907168	2	74868981	74876504	7524	1	53375	ENSMUST00000129284.1	37788	ENSMUSG00000027099	metaxin 2
Crim1	3.42503	-1.14355	0.0554419	0.460268	Promoter (<=1kb)	78201228	78201627	17	78201065	78374282	173218	1	50766	ENSMUST00000234700.1	163	ENSMUSG00000024074	cysteine rich transmembrane BMP regulator 1 (chordin like)
Igfbp7	4.54291	-0.669186	0.0554801	0.460268	Promoter (<=1kb)	77407668	77408067	5	77349240	77408041	58802	2	29817	ENSMUST00000046746.9	0	ENSMUSG00000036256	insulin-like growth factor binding protein 7
Pax3	3.32936	-1.03881	0.0555039	0.460268	Distal Intergenic	77974050	77974449	1	78101267	78196838	95572	2	18505	ENSMUST00000004994.15	222389	ENSMUSG00000004872	paired box 3
Gm973	2.88941	-1.72489	0.0556607	0.461195	Promoter (2-3kb)	59585163	59585562	1	59582396	59607805	25410	1	381260	ENSMUST00000212835.1	2767	ENSMUSG00000047361	predicted gene 973
Tmem151b	6.54851	0.372332	0.0557769	0.461784	Promoter (3-4kb)	45545319	45545718	17	45541952	45549677	7726	2	210573	ENSMUST00000180252.2	3959	ENSMUSG00000096847	transmembrane protein 151B
Abcb7	2.21843	1.93716	0.0558927	0.461872	Intron (ENSMUST00000033695.5/11306, intron 1 of 15)	104361843	104362242	20	104280657	104413846	133190	2	11306	ENSMUST00000033695.5	51604	ENSMUSG00000031333	ATP-binding cassette, sub-family B (MDR/TAP), member 7
Ppp1r16b	4.40744	0.607001	0.0559315	0.461872	Promoter (1-2kb)	158668300	158668699	2	158667119	158766334	99216	1	228852	ENSMUST00000045503.10	1181	ENSMUSG00000037754	protein phosphatase 1, regulatory subunit 16B
Zbtb48	1.00498	2.29845	0.0559477	0.461872	Intron (ENSMUST00000030792.1/110326, intron 2 of 5)	152032852	152033251	4	152019776	152027671	7896	2	100090	ENSMUST00000123696.7	-5181	ENSMUSG00000028952	zinc finger and BTB domain containing 48
Pcdh1	7.00373	0.501215	0.0559913	0.461872	Promoter (<=1kb)	38210686	38211085	18	38203444	38210554	7111	2	75599	ENSMUST00000193828.1	-132	ENSMUSG00000051375	protocadherin 1
Ulbp1	6.66346	-0.396752	0.0560133	0.461872	Distal Intergenic	7393157	7393556	10	7446183	7473341	27159	2	77777	ENSMUST00000169796.3	79785	ENSMUSG00000079685	UL16 binding protein 1
Msl3	1.06267	2.61627	0.0561374	0.462418	Distal Intergenic	168701329	168701728	20	168654117	168673898	19782	2	17692	ENSMUST00000112137.1	-27431	ENSMUSG00000031358	MSL complex subunit 3
Nkd1	3.74376	-1.0524	0.0561697	0.462418	Distal Intergenic	88512842	88513241	8	88521354	88593618	72265	1	93960	ENSMUST00000034086.12	-8113	ENSMUSG00000031661	naked cuticle 1
H2al1j	1.78134	2.0567	0.0562931	0.463061	Distal Intergenic	11390136	11390535	20	11327822	11328151	330	1	236663	ENSMUST00000091180.2	62314	ENSMUSG00000069038	H2A histone family member L1J
Slc45a1	2.80259	1.17328	0.0563576	0.463219	Distal Intergenic	150733860	150734259	4	150628572	150652174	23603	2	242773	ENSMUST00000037827.9	-81686	ENSMUSG00000039838	solute carrier family 45, member 1
Has3	4.61013	-0.708509	0.0564733	0.463797	Promoter (<=1kb)	106871240	106871639	8	106870891	106884566	13676	1	15118	ENSMUST00000175987.1	349	ENSMUSG00000031910	hyaluronan synthase 3
Tenm4	2.36056	1.75834	0.0565411	0.463981	Intron (ENSMUST00000107162.7/23966, intron 6 of 32)	96638690	96639089	7	96644172	96732280	88109	1	23966	ENSMUST00000131541.1	-5083	ENSMUSG00000048078	teneurin transmembrane protein 4
Mir3112	1.42767	2.24456	0.0566228	0.464279	Intron (ENSMUST00000033610.12/237038, intron 12 of 12)	134091329	134091728	20	134075316	134075397	82	1	100526514	ENSMUST00000175431.1	16013	ENSMUSG00000093172	microRNA 3112
Mir676	2.77788	1.74211	0.0566847	0.464415	Intron (ENSMUST00000134582.1/13607, intron 1 of 1)	100203293	100203692	20	100381097	100381185	89	1	751534	ENSMUST00000102443.1	-177405	ENSMUSG00000076398	microRNA 676
Irs1	2.58074	1.31639	0.0568005	0.4646	Promoter (1-2kb)	82289030	82289429	1	82233101	82291416	58316	2	16367	ENSMUST00000069799.2	1987	ENSMUSG00000055980	insulin receptor substrate 1
Ptchd1	3.23967	1.06749	0.056832	0.4646	Promoter (<=1kb)	155624016	155624415	20	155586808	155623814	37007	2	211612	ENSMUST00000141356.1	-202	ENSMUSG00000041552	patched domain containing 1
Cdh20	3.20495	1.05224	0.0568435	0.4646	Distal Intergenic	104051343	104051742	1	104768529	104995481	226953	1	23836	ENSMUST00000062528.8	-716787	ENSMUSG00000050840	cadherin 20
Tlr8	1.93792	2.224	0.0570351	0.465458	Promoter (4-5kb)	167258400	167258799	20	167242732	167263788	21057	2	170744	ENSMUST00000049023.2	4989	ENSMUSG00000040522	toll-like receptor 8
Ppp2r5c	3.42462	0.884637	0.0570394	0.465458	Promoter (<=1kb)	110446495	110446894	12	110447120	110450999	3880	1	26931	ENSMUST00000222276.1	-226	ENSMUSG00000017843	protein phosphatase 2, regulatory subunit B', gamma
Mir3475	0.143111	3.13691	0.0570977	0.465492	Distal Intergenic	140322080	140322479	20	140310948	140311012	65	1	100499512	ENSMUST00000175361.1	11132	ENSMUSG00000093102	microRNA 3475
Thsd7b	2.59373	1.29955	0.0571345	0.465492	Promoter (<=1kb)	129273324	129273723	1	129273344	130219278	945935	1	210417	ENSMUST00000073527.12	0	ENSMUSG00000042581	thrombospondin, type I, domain containing 7B
Dach1	5.02828	0.910277	0.0572952	0.465741	Intron (ENSMUST00000069334.7/13134, intron 1 of 10)	98076628	98077027	14	97786853	98169543	382691	2	13134	ENSMUST00000069334.7	92516	ENSMUSG00000055639	dachshund family transcription factor 1
Fosl1	7.17598	-0.343874	0.0574422	0.465741	Promoter (<=1kb)	5448336	5448735	19	5447921	5450520	2600	1	14283	ENSMUST00000235958.1	415	ENSMUSG00000024912	fos-like antigen 1
Gm16551	3.53179	-1.14007	0.057447	0.465741	Distal Intergenic	74811470	74811869	9	74847983	74852873	4891	1	100503019	ENSMUST00000160979.8	-36114	ENSMUSG00000066477	predicted gene 16551
Cldn34a	0	4.00114	0.0574519	0.465741	Intron (ENSMUST00000238455.1/ENSMUST00000238455.1, intron 1 of 1)	152556335	152556734	20	152563334	152563969	636	1	635396	ENSMUST00000164764.1	-6600	ENSMUSG00000091863	claudin 34A
Mir652	0	3.81452	0.0575094	0.465741	Intron (ENSMUST00000112889.7/209497, intron 1 of 6)	142725026	142725425	20	142739000	142739097	98	1	723976	ENSMUST00000102057.1	-13575	ENSMUSG00000076011	microRNA 652
Itgb6	2.33125	-1.8731	0.0575407	0.465741	Intron (ENSMUST00000028348.8/16420, intron 1 of 17)	60715623	60716022	2	60600231	60722643	122413	2	16420	ENSMUST00000028348.8	6621	ENSMUSG00000026971	integrin beta 6
Bmpr1b	3.60728	-0.930043	0.057571	0.465741	Promoter (<=1kb)	142168923	142169322	3	141840367	142169213	328847	2	12167	ENSMUST00000098568.7	0	ENSMUSG00000052430	bone morphogenetic protein receptor, type 1B
Tmsb15a	0	3.97987	0.0576653	0.465741	Promoter (<=1kb)	135725769	135726168	20	135718667	135725261	6595	2	78478	ENSMUST00000113154.7	-508	ENSMUSG00000060726	thymosin beta 15a
Map3k15	1.01697	2.55534	0.0576983	0.465741	Distal Intergenic	159982070	159982469	20	159988433	160123351	134919	1	270672	ENSMUST00000033665.8	-5964	ENSMUSG00000031303	mitogen-activated protein kinase kinase kinase 15
Pir	1.01697	2.55534	0.0576983	0.465741	Intron (ENSMUST00000145412.7/69656, intron 5 of 8)	164320169	164320568	20	164269573	164309777	40205	1	69656	ENSMUST00000123343.1	50596	ENSMUSG00000031379	pirin
Irx3	5.19976	-0.600471	0.0576999	0.465741	Exon (ENSMUST00000210487.1/ENSMUST00000210487.1, exon 3 of 3)	91711582	91711981	8	91798525	91801915	3391	2	16373	ENSMUST00000093312.5	89934	ENSMUSG00000031734	Iroquois related homeobox 3
Radx	0.0660136	3.05046	0.0577113	0.465741	Intron (ENSMUST00000046763.12/102871, intron 10 of 13)	139517924	139518323	20	139480371	139554582	74212	1	102871	ENSMUST00000113030.2	37553	ENSMUSG00000042498	RPA1 related single stranded DNA binding protein, X-linked
Morc4	2.24153	2.15274	0.057757	0.465742	Intron (ENSMUST00000033811.13/75746, intron 14 of 15)	139824976	139825375	20	139824231	139836103	11873	2	75746	ENSMUST00000172366.1	10728	ENSMUSG00000031434	microrchidia 4
Nkd1	4.48611	-0.60315	0.0578377	0.465787	Promoter (<=1kb)	88522182	88522581	8	88521354	88593618	72265	1	93960	ENSMUST00000034086.12	828	ENSMUSG00000031661	naked cuticle 1
Foxred2	3.01178	1.22869	0.0578535	0.465787	Promoter (<=1kb)	77956015	77956414	15	77941019	77956675	15657	2	239554	ENSMUST00000117725.1	261	ENSMUSG00000016552	FAD-dependent oxidoreductase domain containing 2
Meox2	7.42863	-0.328498	0.0579576	0.466258	Promoter (<=1kb)	37109047	37109446	12	37108540	37179534	70995	1	17286	ENSMUST00000041183.6	507	ENSMUSG00000036144	mesenchyme homeobox 2
Alox8	5.90494	-0.587128	0.0580368	0.466528	Promoter (<=1kb)	69197071	69197470	11	69191537	69197384	5848	2	11688	ENSMUST00000156157.1	0	ENSMUSG00000020891	arachidonate 8-lipoxygenase
Mir692-2	6.3749	-0.743801	0.0581286	0.466606	Intron (ENSMUST00000030676.7/14807, intron 1 of 15)	125540903	125541302	4	125504749	125504857	109	1	735288	ENSMUST00000102081.1	36154	ENSMUSG00000094403	microRNA 692-2
Lrrtm1	4.32336	-0.730333	0.058188	0.466606	Promoter (1-2kb)	77244536	77244935	6	77242922	77244112	1191	1	74342	ENSMUST00000161811.1	1614	ENSMUSG00000060780	leucine rich repeat transmembrane neuronal 1
Syt12	6.40495	-0.452885	0.0582229	0.466606	Promoter (<=1kb)	4476562	4476961	19	4456837	4477126	20290	2	171180	ENSMUST00000166191.1	165	ENSMUSG00000049303	synaptotagmin XII
Irs2	1.9012	1.77825	0.0582401	0.466606	Promoter (<=1kb)	11007959	11008358	8	10984681	11008458	23778	2	384783	ENSMUST00000040514.7	100	ENSMUSG00000038894	insulin receptor substrate 2
Ddx3x	3.01504	1.82952	0.0582744	0.466606	Distal Intergenic	13274588	13274987	20	13280970	13294052	13083	1	13205	ENSMUST00000000804.6	-5983	ENSMUSG00000000787	DEAD box helicase 3, X-linked
Huwe1	1.93854	2.22499	0.0583638	0.466814	Promoter (3-4kb)	151831041	151831440	20	151835248	151935417	100170	1	59026	ENSMUST00000112622.7	-3808	ENSMUSG00000025261	HECT, UBA and WWE domain containing 1
Gjc1	2.49437	-1.58357	0.0584372	0.466814	Promoter (<=1kb)	102820538	102820937	11	102799579	102819700	20122	2	14615	ENSMUST00000092567.10	-838	ENSMUSG00000034520	gap junction protein, gamma 1
Igdcc3	2.01435	1.91446	0.0584924	0.466814	Exon (ENSMUST00000035499.4/56741, exon 19 of 20)	65134611	65135010	9	65141189	65185872	44684	1	19289	ENSMUST00000034961.5	-6179	ENSMUSG00000032394	immunoglobulin superfamily, DCC subclass, member 3
Cypt2	1.95637	2.25122	0.0584996	0.466814	Distal Intergenic	105456453	105456852	20	105499772	105500639	868	1	245566	ENSMUST00000041758.4	-42920	ENSMUSG00000090132	cysteine-rich perinuclear theca 2
Ferd3l	6.90833	-0.368689	0.0585654	0.466814	Promoter (<=1kb)	33928600	33928999	12	33928425	33929310	886	1	114712	ENSMUST00000061035.3	175	ENSMUSG00000046518	Fer3 like bHLH transcription factor
Boc	2.00056	-2.11248	0.0586133	0.466814	Distal Intergenic	44631834	44632233	16	44485049	44558897	73849	2	117606	ENSMUST00000114634.2	-72937	ENSMUSG00000022687	biregional cell adhesion molecule-related/down-regulated by oncogenes (Cdon) binding protein
Inpp5a	2.06904	-2.18688	0.0586567	0.466814	Intron (ENSMUST00000106098.7/212111, intron 9 of 15)	139550023	139550422	7	139523858	139575209	51352	1	212111	ENSMUST00000152475.1	26165	ENSMUSG00000025477	inositol polyphosphate-5-phosphatase A
Lfng	5.47539	-0.650754	0.0586836	0.466814	Promoter (<=1kb)	140606945	140607344	5	140607320	140615545	8226	1	16848	ENSMUST00000031555.2	0	ENSMUSG00000029570	LFNG O-fucosylpeptide 3-beta-N-acetylglucosaminyltransferase
Bcas3os1	6.23349	0.578045	0.0587422	0.466814	Promoter (3-4kb)	85716254	85716653	11	85702200	85719744	17545	2	71489	ENSMUST00000151652.7	3091	ENSMUSG00000086199	breast carcinoma amplified sequence 3, opposite strand 1
Sox14	2.90956	1.10106	0.0587566	0.466814	Distal Intergenic	99799349	99799748	9	99874106	99876170	2065	2	20669	ENSMUST00000054819.9	76422	ENSMUSG00000053747	SRY (sex determining region Y)-box 14
Calr	3.99721	0.651183	0.0589132	0.467492	Promoter (<=1kb)	84846848	84847247	8	84841850	84846934	5085	2	12317	ENSMUST00000003912.6	0	ENSMUSG00000003814	calreticulin
Anp32b	3.52468	0.781277	0.0589642	0.467492	Promoter (<=1kb)	46450762	46451161	4	46450902	46472657	21756	1	67628	ENSMUST00000102926.4	0	ENSMUSG00000028333	acidic (leucine-rich) nuclear phosphoprotein 32 family, member B
Grpr	0.624597	2.73056	0.0589789	0.467492	Distal Intergenic	163484357	163484756	20	163513904	163549677	35774	2	14829	ENSMUST00000033730.2	64921	ENSMUSG00000031364	gastrin releasing peptide receptor
Nhsl2	0.000289586	2.97291	0.0590321	0.467551	Distal Intergenic	101841880	101842279	20	101849385	101949635	100251	1	100042480	ENSMUST00000125115.1	-7106	ENSMUSG00000079481	NHS-like 2
Pex5l	4.13216	-0.798575	0.0593155	0.467707	Promoter (<=1kb)	33142277	33142676	3	33131566	33143076	11511	2	58869	ENSMUST00000155264.1	400	ENSMUSG00000027674	peroxisomal biogenesis factor 5-like
Col4a6	0.615233	2.71862	0.05935	0.467707	Intron (ENSMUST00000101205.2/94216, intron 3 of 44)	141314040	141314439	20	141186191	141207602	21412	2	94216	ENSMUST00000137051.7	-106438	ENSMUSG00000031273	collagen, type IV, alpha 6
Rps6ka3	0.615233	2.71862	0.05935	0.467707	Distal Intergenic	159202635	159203034	20	159210307	159364502	154196	1	110651	ENSMUST00000112493.7	-7273	ENSMUSG00000031309	ribosomal protein S6 kinase polypeptide 3
Prps1	0.384883	2.55596	0.0593711	0.467707	Distal Intergenic	140436376	140436775	20	140456613	140465442	8830	1	19139	ENSMUST00000155235.1	-19838	ENSMUSG00000031432	phosphoribosyl pyrophosphate synthetase 1
Ppic	5.31518	-0.535198	0.0594328	0.467707	Promoter (<=1kb)	53417867	53418266	18	53406332	53418115	11784	2	19038	ENSMUST00000025419.8	0	ENSMUSG00000024538	peptidylprolyl isomerase C
Eda	1.65537	2.48487	0.0594953	0.467707	Distal Intergenic	99950315	99950714	20	99975606	100311299	335694	1	13607	ENSMUST00000134582.1	-24892	ENSMUSG00000059327	ectodysplasin-A
Slit2	5.4439	0.560323	0.0596328	0.467707	Promoter (<=1kb)	47984914	47985313	5	47984994	48173193	188200	1	20563	ENSMUST00000173926.7	0	ENSMUSG00000031558	slit guidance ligand 2
Phactr3	4.99652	-0.562665	0.0596518	0.467707	Promoter (<=1kb)	178119074	178119473	2	178119179	178336491	217313	1	74189	ENSMUST00000108916.7	0	ENSMUSG00000027525	phosphatase and actin regulator 3
H2-L	2.28064	-2.33342	0.0596599	0.467707	Distal Intergenic	35275465	35275864	17	35265477	35266319	843	1	14980	ENSMUST00000174325.1	9988	NA	histocompatibility 2, D region locus L
9230105E05Rik	3.00122	-1.71016	0.059664	0.467707	Promoter (2-3kb)	120392078	120392477	10	120389523	120392793	3271	1	320626	ENSMUST00000161291.1	2555	ENSMUSG00000090191	RIKEN cDNA 9230105E05 gene
Slc6a20a	6.84973	-0.370509	0.059666	0.467707	Promoter (<=1kb)	123678603	123679002	9	123634770	123678806	44037	2	102680	ENSMUST00000171647.8	0	ENSMUSG00000036814	solute carrier family 6 (neurotransmitter transporter), member 20A
Gcnt2	0.625991	-4.20382	0.0596715	0.467707	Intron (ENSMUST00000110191.9/14538, intron 1 of 2)	40906003	40906402	13	40917601	40960892	43292	1	14538	ENSMUST00000067778.7	-11199	ENSMUSG00000021360	glucosaminyl (N-acetyl) transferase 2, I-branching enzyme
Gm20517	2.21427	1.58263	0.0597934	0.467707	Promoter (<=1kb)	47672357	47672756	17	47672720	47681056	8337	1	112694759	ENSMUST00000152724.1	0	ENSMUSG00000023984	predicted gene 20517
Mettl15	2.12427	-2.23736	0.0598407	0.467707	Distal Intergenic	108751210	108751609	2	109092300	109278280	185981	2	76894	ENSMUST00000147376.7	526671	ENSMUSG00000057234	methyltransferase like 15
Zfhx3	2.12427	-2.23736	0.0598407	0.467707	Intron (ENSMUST00000220518.1/11906, intron 7 of 15)	108733813	108734212	8	108714644	108961630	246987	1	11906	ENSMUST00000043896.9	19169	ENSMUSG00000038872	zinc finger homeobox 3
Lrg1	7.0542	-0.358912	0.059863	0.467707	Promoter (1-2kb)	56120391	56120790	17	56119678	56122001	2324	2	76905	ENSMUST00000041357.8	1211	ENSMUSG00000037095	leucine-rich alpha-2-glycoprotein 1
A530065N20Rik	4.24325	-0.808875	0.0599076	0.467707	Intron (ENSMUST00000225266.1/328263, intron 1 of 2)	60096877	60097276	13	60029711	60116669	86959	1	328263	ENSMUST00000225266.1	67166	ENSMUSG00000114531	RIKEN cDNA A530046M15 gene
Mylip	2.76573	-1.49615	0.0599256	0.467707	Distal Intergenic	45417938	45418337	13	45390927	45411045	20119	1	218203	ENSMUST00000222178.1	27011	ENSMUSG00000038175	myosin regulatory light chain interacting protein
Gdpd2	2.38599	1.985	0.0599517	0.467707	Promoter (<=1kb)	100730272	100730671	20	100730186	100738894	8709	1	71584	ENSMUST00000113744.1	86	ENSMUSG00000019359	glycerophosphodiester phosphodiesterase domain containing 2
Fzd5	6.12711	-0.569582	0.0599659	0.467707	Promoter (1-2kb)	64735551	64735950	1	64734469	64737749	3281	2	14367	ENSMUST00000116133.3	1799	ENSMUSG00000045005	frizzled class receptor 5
Trappc2	2.06914	2.14164	0.0601286	0.468113	Distal Intergenic	166453515	166453914	20	166445303	166453140	7838	1	66226	ENSMUST00000112194.1	8212	ENSMUSG00000079317	trafficking protein particle complex 2
Map7d2	1.1322	2.70775	0.0601394	0.468113	Exon (ENSMUST00000112471.8/78283, exon 11 of 17)	159489286	159489685	20	159459137	159470093	10957	1	78283	ENSMUST00000156172.2	30149	ENSMUSG00000041020	MAP7 domain containing 2
Prps2	2.18208	1.87993	0.0601609	0.468113	Exon (ENSMUST00000238211.1/333605, exon 16 of 17)	167476724	167477123	20	167346322	167382749	36428	2	110639	ENSMUST00000026839.4	-93975	ENSMUSG00000025742	phosphoribosyl pyrophosphate synthetase 2
Dab1	3.47907	0.950762	0.0602272	0.468113	Promoter (<=1kb)	104367292	104367691	4	104367590	104741797	374208	1	13131	ENSMUST00000146078.7	0	ENSMUSG00000028519	disabled 1
Lrrfip1	4.44819	-0.622466	0.0602468	0.468113	Promoter (<=1kb)	91052702	91053101	1	91053444	91128944	75501	1	16978	ENSMUST00000068167.12	-343	ENSMUSG00000026305	leucine rich repeat (in FLII) interacting protein 1
Eda	2.62218	1.93876	0.0603188	0.468318	Intron (ENSMUST00000134582.1/13607, intron 1 of 1)	100137908	100138307	20	99975781	100397156	421376	1	13607	ENSMUST00000071453.2	162127	ENSMUSG00000059327	ectodysplasin-A
Cnksr2	2.10666	1.81933	0.0604405	0.468907	Distal Intergenic	158374154	158374553	20	157832743	158043294	210552	2	245684	ENSMUST00000112513.1	-330860	ENSMUSG00000025658	connector enhancer of kinase suppressor of Ras 2
Gm15246	2.70904	1.90978	0.0605521	0.469227	Intron (ENSMUST00000129410.1/ENSMUST00000129410.1, intron 1 of 5)	169449854	169450253	20	169320622	169368190	47569	1	101055907	ENSMUST00000149873.1	129232	ENSMUSG00000087159	predicted gene 15246
Nsg1	3.08138	1.17823	0.0605736	0.469227	Promoter (<=1kb)	38159703	38160102	5	38137192	38159907	22716	2	18196	ENSMUST00000031009.7	0	ENSMUSG00000029126	neuron specific gene family member 1
Hdac8	2.62508	1.94342	0.0608404	0.470518	Intron (ENSMUST00000087916.10/70315, intron 7 of 10)	102420243	102420642	20	102498156	102504741	6586	2	70315	ENSMUST00000154024.1	84099	ENSMUSG00000067567	histone deacetylase 8
Dach1	1.96786	1.68603	0.0608535	0.470518	Distal Intergenic	98178434	98178833	14	97825866	98169765	343900	2	13134	ENSMUST00000156684.1	-8669	ENSMUSG00000055639	dachshund family transcription factor 1
Gm15825	8.70496	0.485927	0.0610573	0.470518	Promoter (<=1kb)	19104445	19104844	1	19063300	19104840	41541	2	102635013	ENSMUST00000159108.2	0	ENSMUSG00000089787	predicted gene 15825
Mageh1	1.94991	2.24167	0.0610621	0.470518	Distal Intergenic	153022653	153023052	20	153036166	153037575	1410	2	75625	ENSMUST00000051484.4	14523	ENSMUSG00000047238	MAGE family member H1
Fbll1	5.32045	-0.630451	0.0610889	0.470518	Promoter (<=1kb)	35797677	35798076	11	35797382	35798884	1503	2	237730	ENSMUST00000160726.3	808	ENSMUSG00000051062	fibrillarin-like 1
Otud6a	4.11272	1.54816	0.0611084	0.470518	Intron (ENSMUST00000147103.1/245532, intron 1 of 7)	100434966	100435365	20	100429013	100429885	873	1	408193	ENSMUST00000060241.2	5953	ENSMUSG00000051582	OTU domain containing 6A
Cited1	1.59372	2.10648	0.0611451	0.470518	Downstream (2-3kb)	102244281	102244680	20	102247821	102250775	2955	2	12705	ENSMUST00000130589.1	6095	ENSMUSG00000051159	Cbp/p300-interacting transactivator with Glu/Asp-rich carboxy-terminal domain 1
Olfr1505	2.26471	-1.75049	0.0611681	0.470518	Distal Intergenic	14241766	14242165	19	13918942	13920044	1103	1	258151	ENSMUST00000081520.2	322824	ENSMUSG00000062314	olfactory receptor 1505
Col4a5	0.673034	2.79209	0.0611787	0.470518	Intron (ENSMUST00000112931.7/12830, intron 1 of 52)	141503713	141504112	20	141475410	141689180	213771	1	12830	ENSMUST00000112930.7	28303	ENSMUSG00000031274	collagen, type IV, alpha 5
Sytl4	1.00963	2.5455	0.0611999	0.470518	Distal Intergenic	133995816	133996215	20	133946448	133981812	35365	2	27359	ENSMUST00000113294.7	-14004	ENSMUSG00000031255	synaptotagmin-like 4
Fto	4.85803	0.573824	0.0612891	0.470849	Intron (ENSMUST00000069718.14/26383, intron 1 of 8)	91369467	91369866	8	91390555	91409464	18910	1	26383	ENSMUST00000149913.1	-20689	ENSMUSG00000055932	fat mass and obesity associated
Eif4a2	3.92501	-0.767725	0.0614317	0.471323	Distal Intergenic	23100217	23100616	16	23107444	23113947	6504	1	13682	ENSMUST00000023599.12	-6828	ENSMUSG00000022884	eukaryotic translation initiation factor 4A2
Rab34	2.53216	1.41543	0.06145	0.471323	Promoter (<=1kb)	78188773	78189172	11	78188779	78192188	3410	1	19376	ENSMUST00000108322.8	0	ENSMUSG00000002059	RAB34, member RAS oncogene family
Enpp1	5.07139	-0.535127	0.0615484	0.471323	Promoter (<=1kb)	24711477	24711876	10	24641806	24711991	70186	2	18605	ENSMUST00000135846.1	115	ENSMUSG00000037370	ectonucleotide pyrophosphatase/phosphodiesterase 1
Nhs	1.74571	2.25618	0.0616039	0.471323	Intron (ENSMUST00000087085.9/195727, intron 1 of 8)	162080377	162080776	20	161836815	162159388	322574	2	195727	ENSMUST00000081569.6	78612	ENSMUSG00000059493	NHS actin remodeling regulator
Guk1	0.511149	-4.10302	0.0616146	0.471323	Promoter (<=1kb)	59188059	59188458	11	59184047	59187741	3695	2	14923	ENSMUST00000170895.2	-318	ENSMUSG00000020444	guanylate kinase 1
Irs4	1.86037	2.17469	0.0616362	0.471323	Distal Intergenic	141942356	141942755	20	141710998	141725263	14266	2	16370	ENSMUST00000067841.7	-217093	ENSMUSG00000054667	insulin receptor substrate 4
Rhcg	2.45918	1.3978	0.0617161	0.471323	Promoter (2-3kb)	79591991	79592390	7	79593369	79594929	1561	2	56315	ENSMUST00000172788.2	2539	ENSMUSG00000030549	Rhesus blood group-associated C glycoprotein
1700018B08Rik	6.7386	-0.387229	0.0617877	0.471323	Intron (ENSMUST00000127664.1/108148, intron 1 of 15)	121390653	121391052	8	121530828	121541869	11042	2	76405	ENSMUST00000182739.7	150817	ENSMUSG00000031809	RIKEN cDNA 1700018B08 gene
Nhsl1	4.06141	1.1199	0.061803	0.471323	Intron (ENSMUST00000207038.1/215819, intron 1 of 6)	18371326	18371725	10	18390322	18524289	133968	1	215819	ENSMUST00000159299.7	-18597	ENSMUSG00000039835	NHS-like 1
B3gnt4	2.04302	1.62286	0.0618427	0.471323	Promoter (1-2kb)	123508063	123508462	5	123510460	123511882	1423	1	231727	ENSMUST00000031384.5	-1998	ENSMUSG00000029431	UDP-GlcNAc:betaGal beta-1,3-N-acetylglucosaminyltransferase 4
Elfn2	6.8771	0.390284	0.0618574	0.471323	Promoter (<=1kb)	78717782	78718181	15	78667331	78718113	50783	2	207393	ENSMUST00000229441.1	0	ENSMUSG00000043460	leucine rich repeat and fibronectin type III, extracellular 2
Mir676	2.09391	1.97993	0.061988	0.471486	Intron (ENSMUST00000113781.7/13607, intron 2 of 6)	100342852	100343251	20	100381097	100381185	89	1	751534	ENSMUST00000102443.1	-37846	ENSMUSG00000076398	microRNA 676
Krt7	4.71457	-0.640424	0.0619938	0.471486	Promoter (<=1kb)	101412204	101412603	15	101412402	101430313	17912	1	110310	ENSMUST00000068904.8	0	ENSMUSG00000023039	keratin 7
Atrx	2.26018	2.00217	0.0620171	0.471486	Downstream (<1kb)	105796521	105796920	20	105800417	105802050	1634	2	22589	ENSMUST00000143361.1	5130	ENSMUSG00000031229	ATRX, chromatin remodeler
P2ry10	2.26209	2.18388	0.0620859	0.471659	Distal Intergenic	107024639	107025038	20	107088492	107104970	16479	1	78826	ENSMUST00000150494.1	-63454	ENSMUSG00000050921	purinergic receptor P2Y, G-protein coupled 10
Boc	3.57262	-1.25995	0.0622875	0.472458	Distal Intergenic	44575570	44575969	16	44485049	44558897	73849	2	117606	ENSMUST00000114634.2	-16673	ENSMUSG00000022687	biregional cell adhesion molecule-related/down-regulated by oncogenes (Cdon) binding protein
Mir672	0.0132781	2.98824	0.0623564	0.472458	Promoter (2-3kb)	104113766	104114165	20	104116175	104116274	100	2	751535	ENSMUST00000102331.1	2109	ENSMUSG00000076286	microRNA 672
Frmpd4	0.0132781	2.98824	0.0623564	0.472458	Intron (ENSMUST00000112147.8/333605, intron 3 of 19)	167976897	167977296	20	167471313	167897558	426246	2	333605	ENSMUST00000112145.2	-79339	ENSMUSG00000049176	FERM and PDZ domain containing 4
Emilin2	5.20248	-0.604307	0.0623757	0.472458	Promoter (<=1kb)	71309978	71310377	17	71275192	71310281	35090	2	246707	ENSMUST00000233728.1	0	ENSMUSG00000024053	elastin microfibril interfacer 2
Mid1	2.42581	2.00167	0.0625255	0.473242	Distal Intergenic	169556644	169557043	20	169685199	169990795	305597	1	17318	ENSMUST00000112107.7	-128156	ENSMUSG00000035299	midline 1
Rsad1	1.9543	1.72694	0.0626355	0.473569	Promoter (<=1kb)	94549056	94549455	11	94539798	94549199	9402	2	237926	ENSMUST00000040487.3	0	ENSMUSG00000039096	radical S-adenosyl methionine domain containing 1
Kcnq1ot1	2.61824	-1.76251	0.0626613	0.473569	Exon (ENSMUST00000185789.2/63830, exon 1 of 1)	143290363	143290762	7	143203458	143296549	93092	2	63830	ENSMUST00000185789.2	5787	ENSMUSG00000101609	KCNQ1 overlapping transcript 1
Pak3	2.18954	1.59346	0.0627637	0.473993	Promoter (<=1kb)	143663925	143664324	20	143664290	143797792	133503	1	18481	ENSMUST00000112868.7	0	ENSMUSG00000031284	p21 (RAC1) activated kinase 3
Nodal	6.84951	-0.358701	0.0628289	0.474136	Promoter (<=1kb)	61418876	61419275	10	61417972	61425338	7367	1	18119	ENSMUST00000049339.6	904	ENSMUSG00000037171	nodal
H2al1a	1.58157	2.3817	0.0629101	0.474399	Distal Intergenic	11255443	11255842	20	11299257	11299757	501	1	100042922	ENSMUST00000188439.1	-43415	ENSMUSG00000100626	H2A histone family member L1A
Rapgef5	3.25195	1.09737	0.0630303	0.474617	Promoter (<=1kb)	117533901	117534300	12	117533888	117658370	124483	1	217944	ENSMUST00000220781.1	13	ENSMUSG00000041992	Rap guanine nucleotide exchange factor (GEF) 5
Gm49890	3.2063	-1.22697	0.0630318	0.474617	Promoter (2-3kb)	88935216	88935615	4	88909855	88938521	28667	2	106557447	ENSMUST00000233522.1	2906	NA	predicted gene, 49890
Sox14	3.81058	-0.812816	0.0631444	0.475115	Exon (ENSMUST00000216324.1/ENSMUST00000216324.1, exon 3 of 3)	99848454	99848853	9	99874106	99876170	2065	2	20669	ENSMUST00000054819.9	27317	ENSMUSG00000053747	SRY (sex determining region Y)-box 14
Phyhip	4.84668	-0.588659	0.0632341	0.475144	Promoter (<=1kb)	70458257	70458656	14	70458523	70463340	4818	1	105653	ENSMUST00000159180.1	0	ENSMUSG00000003469	phytanoyl-CoA hydroxylase interacting protein
Htr1a	7.26097	-0.363011	0.0632535	0.475144	Promoter (<=1kb)	105444388	105444787	13	105443639	105448122	4484	1	15550	ENSMUST00000022235.5	749	ENSMUSG00000021721	5-hydroxytryptamine (serotonin) receptor 1A
Map7d2	2.69973	1.89464	0.0632876	0.475144	Exon (ENSMUST00000112471.8/78283, exon 9 of 17)	159482275	159482674	20	159459137	159470093	10957	1	78283	ENSMUST00000156172.2	23138	ENSMUSG00000041020	MAP7 domain containing 2
Prps2	1.75029	2.26285	0.0633705	0.475418	Intron (ENSMUST00000238211.1/333605, intron 4 of 16)	167583246	167583645	20	167346322	167382749	36428	2	110639	ENSMUST00000026839.4	-200497	ENSMUSG00000025742	phosphoribosyl pyrophosphate synthetase 2
9330117O12Rik	3.71174	0.701432	0.0634985	0.475706	Distal Intergenic	54720916	54721315	18	54611744	54639870	28127	1	328957	ENSMUST00000237954.1	109172	ENSMUSG00000118154	RIKEN cDNA 9330117O12 gene
Nrxn2	3.31424	0.92747	0.0635096	0.475706	Promoter (1-2kb)	6499462	6499861	19	6497835	6544169	46335	1	18190	ENSMUST00000113459.1	1627	ENSMUSG00000033768	neurexin II
Dgat2l6	1.63349	2.45448	0.0636736	0.475706	Distal Intergenic	100518002	100518401	20	100524838	100545891	21054	1	668257	ENSMUST00000140551.1	-6437	ENSMUSG00000067597	diacylglycerol O-acyltransferase 2-like 6
Htr1d	6.17014	-0.528566	0.0637611	0.475706	Promoter (<=1kb)	136424663	136425062	4	136424612	136441970	17359	1	15552	ENSMUST00000133818.1	51	ENSMUSG00000070687	5-hydroxytryptamine (serotonin) receptor 1D
Dnaaf6b	1.57464	2.37187	0.0638142	0.475706	Intron (ENSMUST00000044806.2/331537, intron 5 of 6)	140091356	140091755	20	140062879	140106797	43919	1	331537	ENSMUST00000044806.2	28477	ENSMUSG00000042433	dynein axonemal assembly factor 6B
Sh3kbp1	1.57464	2.37187	0.0638142	0.475706	Intron (ENSMUST00000112456.8/58194, intron 6 of 17)	159863666	159864065	20	159840964	159975916	134953	1	58194	ENSMUST00000112447.7	22702	ENSMUSG00000040990	SH3-domain kinase binding protein 1
Frmpd3	2.09336	2.17813	0.0638146	0.475706	Promoter (1-2kb)	140379891	140380290	20	140381971	140394540	12570	1	245643	ENSMUST00000044702.6	-1681	ENSMUSG00000042425	FERM and PDZ domain containing 3
Nlgn2	2.71543	1.25623	0.0638263	0.475706	Promoter (<=1kb)	69835308	69835707	11	69823122	69834849	11728	2	216856	ENSMUST00000056484.9	-459	ENSMUSG00000051790	neuroligin 2
Cdkl5	2.31977	2.04584	0.0638392	0.475706	Distal Intergenic	161012171	161012570	20	160784308	160994704	210397	2	382253	ENSMUST00000087104.10	-17467	ENSMUSG00000031292	cyclin-dependent kinase-like 5
Ptgis	4.20277	-0.744722	0.0638745	0.475706	Promoter (<=1kb)	167240219	167240618	2	167191805	167240589	48785	2	19223	ENSMUST00000088041.10	0	ENSMUSG00000017969	prostaglandin I2 (prostacyclin) synthase
Glis3	2.63196	1.22458	0.0639778	0.475706	Exon (ENSMUST00000162380.1/ENSMUST00000162380.1, exon 2 of 2)	28581206	28581605	19	28262973	28540420	277448	2	226075	ENSMUST00000161026.1	-40786	ENSMUSG00000052942	GLIS family zinc finger 3
Col4a6	1.96548	1.84385	0.0639804	0.475706	Intron (ENSMUST00000101205.2/94216, intron 2 of 44)	141387056	141387455	20	141165403	141474076	308674	2	94216	ENSMUST00000101205.2	86621	ENSMUSG00000031273	collagen, type IV, alpha 6
Pparg	7.16253	-0.381498	0.0640133	0.475706	Promoter (<=1kb)	115361579	115361978	6	115362292	115490394	128103	1	19016	ENSMUST00000203732.2	-314	ENSMUSG00000000440	peroxisome proliferator activated receptor gamma
Pom121l2	6.87267	-0.370794	0.0641056	0.476047	Promoter (<=1kb)	21981192	21981591	13	21981194	21988734	7541	1	195236	ENSMUST00000117882.1	0	ENSMUSG00000016982	POM121 membrane glycoprotein-like 2 (rat)
Rab9	1.89463	2.15971	0.0641754	0.47622	Promoter (<=1kb)	166474077	166474476	20	166458135	166475435	17301	2	56382	ENSMUST00000149315.1	959	ENSMUSG00000079316	RAB9, member RAS oncogene family
Cda	4.47973	-1.03615	0.0643752	0.477278	Promoter (<=1kb)	138367782	138368181	4	138338528	138367992	29465	2	72269	ENSMUST00000030535.3	0	ENSMUSG00000028755	cytidine deaminase
Arg2	5.43217	-0.616838	0.0644113	0.477278	Promoter (<=1kb)	79130660	79131059	12	79130777	79156301	25525	1	11847	ENSMUST00000021550.6	0	ENSMUSG00000021125	arginase type II
Csnk1e	1.96992	-2.07928	0.0645549	0.477638	Promoter (<=1kb)	79455115	79455514	15	79426259	79455566	29308	2	27373	ENSMUST00000230599.1	52	ENSMUSG00000022433	casein kinase 1, epsilon
Bsn	1.9235	1.69282	0.0645572	0.477638	Promoter (<=1kb)	108189635	108190034	9	108096022	108190384	94363	2	12217	ENSMUST00000035208.13	350	ENSMUSG00000032589	bassoon
Cdh15	2.11639	1.57606	0.0646	0.477638	Promoter (<=1kb)	122848907	122849306	8	122847966	122867397	19432	1	12555	ENSMUST00000034443.6	941	ENSMUSG00000031962	cadherin 15
Nhsl2	2.53784	1.70948	0.0646799	0.477884	Distal Intergenic	101830550	101830949	20	101849385	101949635	100251	1	100042480	ENSMUST00000125115.1	-18436	ENSMUSG00000079481	NHS-like 2
Haus7	2.4312	1.46021	0.0647362	0.477955	Promoter (<=1kb)	73459004	73459403	20	73437315	73459044	21730	2	73738	ENSMUST00000033737.14	0	ENSMUSG00000031371	HAUS augmin-like complex, subunit 7
Frmpd4	2.32578	2.05516	0.0648716	0.478412	Intron (ENSMUST00000112147.8/333605, intron 3 of 19)	168226965	168227364	20	167475298	168124290	648993	2	333605	ENSMUST00000239138.1	-102675	ENSMUSG00000049176	FERM and PDZ domain containing 4
4933402J07Rik	5.77111	-0.478612	0.0648916	0.478412	Downstream (1-2kb)	87660247	87660646	8	87563853	87589424	25572	1	330820	ENSMUST00000093342.5	96394	ENSMUSG00000069971	RIKEN cDNA 4933402J07 gene
Gm1720	2.87125	1.86622	0.0649802	0.478607	Distal Intergenic	166712370	166712769	20	166662025	166689812	27788	1	382255	ENSMUST00000135086.1	50345	ENSMUSG00000086860	predicted gene 1720
Phka2	2.35663	1.93779	0.0650116	0.478607	Intron (ENSMUST00000112377.7/110094, intron 11 of 33)	160544951	160545350	20	160557787	160562749	4963	1	110094	ENSMUST00000153907.1	-12437	ENSMUSG00000031295	phosphorylase kinase alpha 2
Ppp1r3g	5.04823	-0.777434	0.0650678	0.478611	Promoter (<=1kb)	35968833	35969232	13	35967853	35970388	2536	1	76487	ENSMUST00000132661.1	980	ENSMUSG00000050423	protein phosphatase 1, regulatory subunit 3G
Mmp25	5.91182	-0.592153	0.0651057	0.478611	Promoter (<=1kb)	23645053	23645452	17	23628311	23645277	16967	2	240047	ENSMUST00000024696.8	0	ENSMUSG00000023903	matrix metallopeptidase 25
Lnpk	4.25461	0.698043	0.0651767	0.478789	Promoter (<=1kb)	74578768	74579167	2	74520291	74578948	58658	2	69605	ENSMUST00000111993.8	0	ENSMUSG00000009207	lunapark, ER junction formation factor
Arhgap6	2.55287	2.00828	0.0652964	0.47883	Intron (ENSMUST00000033721.12/11856, intron 1 of 12)	168953678	168954077	20	169036611	169251527	214917	1	11856	ENSMUST00000143048.1	-82534	ENSMUSG00000031355	Rho GTPase activating protein 6
Mir6944	2.07974	1.51041	0.0653211	0.47883	Exon (ENSMUST00000046533.8/432763, exon 2 of 3)	55471739	55472138	13	55477681	55477776	96	2	102465569	ENSMUST00000183653.1	5638	ENSMUSG00000098341	microRNA 6944
Ndfip1	3.57058	-0.896544	0.0653608	0.47883	Distal Intergenic	38483750	38484149	18	38451310	38464383	13074	1	65113	ENSMUST00000238135.1	32440	ENSMUSG00000024425	Nedd4 family interacting protein 1
Asb9	1.90706	2.17826	0.0655067	0.47883	Distal Intergenic	164549575	164549974	20	164506327	164539752	33426	1	69299	ENSMUST00000033756.2	43248	ENSMUSG00000031384	ankyrin repeat and SOCS box-containing 9
Tle4	2.94793	-1.50902	0.0655112	0.47883	Intron (ENSMUST00000052011.14/21888, intron 8 of 19)	14502566	14502965	19	14543726	14595539	51814	2	21888	ENSMUST00000235975.1	92574	ENSMUSG00000024642	transducin-like enhancer of split 4
Amelx	2.1951	2.08206	0.0655892	0.47883	Intron (ENSMUST00000033721.12/11856, intron 2 of 12)	169233721	169234120	20	169180022	169187200	7179	2	11704	ENSMUST00000154923.1	-46521	ENSMUSG00000031354	amelogenin, X-linked
Scml2	2.81285	1.92096	0.0656244	0.47883	Intron (ENSMUST00000238603.1/107815, intron 11 of 11)	161194757	161195156	20	161163060	161255659	92600	1	107815	ENSMUST00000077375.4	31697	ENSMUSG00000000037	Scm polycomb group protein like 2
Tal2	4.58475	0.701475	0.0656355	0.47883	Promoter (<=1kb)	53779904	53780303	4	53779705	53788712	9008	1	21350	ENSMUST00000030124.3	199	ENSMUSG00000028417	T cell acute lymphocytic leukemia 2
Tcf7l2	0.546359	-4.134	0.0656867	0.47883	Intron (ENSMUST00000223690.1/53611, intron 8 of 8)	55588037	55588436	19	55741820	55933229	191410	1	21416	ENSMUST00000111662.10	-153384	ENSMUSG00000024985	transcription factor 7 like 2, T cell specific, HMG box
Tle3	0.546359	-4.134	0.0656867	0.47883	Distal Intergenic	61489622	61490021	9	61409937	61418419	8483	1	21887	ENSMUST00000162281.1	79685	ENSMUSG00000032280	transducin-like enhancer of split 3
Nrg2	5.62775	-0.577271	0.0657021	0.47883	Intron (ENSMUST00000115713.8/100042150, intron 1 of 9)	36068450	36068849	18	36022306	36052884	30579	2	100042150	ENSMUST00000237681.1	-15566	ENSMUSG00000060275	neuregulin 2
Cdkn2a	9.21851	0.53106	0.0657533	0.47883	Exon (ENSMUST00000060501.4/12578, exon 2 of 3)	89276641	89277040	4	89274471	89282192	7722	2	12578	ENSMUST00000060501.4	5152	ENSMUSG00000044303	cyclin dependent kinase inhibitor 2A
Trp73	2.05033	-2.18081	0.0658416	0.47883	Promoter (4-5kb)	154101292	154101691	4	154058512	154097173	38662	2	22062	ENSMUST00000097762.10	-4119	ENSMUSG00000029026	transformation related protein 73
Dleu2	7.13471	0.356562	0.0658961	0.47883	Distal Intergenic	61689066	61689465	14	61602839	61682373	79535	2	668253	ENSMUST00000182768.7	-6693	ENSMUSG00000097589	deleted in lymphocytic leukemia, 2
Rasd2	6.16025	-0.435008	0.0659452	0.47883	Promoter (<=1kb)	75214654	75215053	8	75214502	75222371	7870	1	75141	ENSMUST00000132133.1	152	ENSMUSG00000034472	RASD family, member 2
D430036J16Rik	5.78345	-0.495234	0.0659608	0.47883	Promoter (<=1kb)	81632537	81632936	9	81632418	81644352	11935	1	319405	ENSMUST00000183781.1	119	ENSMUSG00000097466	RIKEN cDNA D430036J16 gene
Zic3	3.25495	-1.37389	0.0660164	0.47883	Distal Intergenic	58448946	58449345	20	58031010	58041736	10727	1	22773	ENSMUST00000088629.3	417936	ENSMUSG00000067860	zinc finger protein of the cerebellum 3
Nyx	3.66475	1.63658	0.0660245	0.47883	Distal Intergenic	13411496	13411895	20	13466110	13489313	23204	1	236690	ENSMUST00000050434.5	-54215	ENSMUSG00000051228	nyctalopin
Armcx6	2.87126	1.75215	0.0661111	0.479118	Promoter (3-4kb)	134747485	134747884	20	134748461	134751331	2871	2	278097	ENSMUST00000113194.7	3447	ENSMUSG00000050394	armadillo repeat containing, X-linked 6
Mir384	2.23381	2.14109	0.0661583	0.479121	Distal Intergenic	105320157	105320556	20	105344282	105344369	88	2	723861	ENSMUST00000083565.1	23813	ENSMUSG00000065499	microRNA 384
3632454L22Rik	0.978701	2.50373	0.0662102	0.479157	Distal Intergenic	135101716	135102115	20	135023533	135060336	36804	2	320606	ENSMUST00000142907.7	-41380	ENSMUSG00000089759	RIKEN cDNA 3632454L22 gene
Ctps2	1.51847	2.29164	0.0665047	0.480949	Intron (ENSMUST00000112303.7/55936, intron 16 of 18)	163008271	163008670	20	162969105	163031319	62215	1	55936	ENSMUST00000112300.1	39166	ENSMUSG00000031360	cytidine 5'-triphosphate synthase 2
Bcor	2.17831	2.05623	0.0667542	0.482366	Distal Intergenic	11872188	11872587	20	12036740	12080553	43814	2	71458	ENSMUST00000065143.13	207966	ENSMUSG00000040363	BCL6 interacting corepressor
Gm8817	1.75486	2.2695	0.066795	0.482366	Distal Intergenic	166968774	166969173	20	167063552	167068389	4838	2	667794	ENSMUST00000171902.2	99216	ENSMUSG00000086008	predicted gene 8817
Bclaf3	2.86327	1.85304	0.0669194	0.482482	Promoter (<=1kb)	159526938	159527337	20	159526688	159551839	25152	1	382252	ENSMUST00000144598.7	250	ENSMUSG00000044150	Bclaf1 and Thrap3 family member 3
Car5b	0.686048	2.8074	0.066947	0.482482	Promoter (3-4kb)	164024382	164024781	20	164011885	164027981	16097	2	56078	ENSMUST00000126650.1	3200	ENSMUSG00000031373	carbonic anhydrase 5b, mitochondrial
Foxp4	3.75779	-0.865348	0.0669525	0.482482	Promoter (<=1kb)	47877693	47878092	17	47878480	47878953	474	2	74123	ENSMUST00000154108.1	861	ENSMUSG00000023991	forkhead box P4
Ak8	6.02099	-0.467515	0.0673183	0.484564	Intron (ENSMUST00000074156.6/68870, intron 10 of 12)	28752903	28753302	2	28742250	28760136	17887	1	68870	ENSMUST00000137588.1	10653	ENSMUSG00000026807	adenylate kinase 8
Dhx35	2.28912	-1.82864	0.0673361	0.484564	Distal Intergenic	159076141	159076540	2	158850629	158857368	6740	1	71715	ENSMUST00000143195.1	225512	ENSMUSG00000027655	DEAH (Asp-Glu-Ala-His) box polypeptide 35
St6galnac5	4.22036	-0.681834	0.0675042	0.48509	Promoter (<=1kb)	152981039	152981438	3	152975374	152982052	6679	2	26938	ENSMUST00000161757.1	614	ENSMUSG00000039037	ST6 (alpha-N-acetyl-neuraminyl-2,3-beta-galactosyl-1,3)-N-acetylgalactosaminide alpha-2,6-sialyltransferase 5
Mapk4	2.847	1.32391	0.0675129	0.48509	Promoter (<=1kb)	74065263	74065662	18	73971170	74065359	94190	2	225724	ENSMUST00000160601.1	0	ENSMUSG00000024558	mitogen-activated protein kinase 4
Tgif1	4.58795	-0.671328	0.0675548	0.48509	Exon (ENSMUST00000175668.1/ENSMUST00000175668.1, exon 1 of 2)	70834407	70834806	17	70844869	70846326	1458	2	21815	ENSMUST00000156484.1	11520	ENSMUSG00000047407	TGFB-induced factor homeobox 1
5330434G04Rik	2.78992	1.88296	0.0676398	0.48509	Promoter (1-2kb)	105393724	105394123	20	105350360	105391776	41417	2	100043213	ENSMUST00000150604.7	-1948	ENSMUSG00000087620	RIKEN cDNA 5330434G04 gene
Gm14827	2.64658	1.97805	0.0676462	0.48509	Distal Intergenic	94432665	94433064	20	94442732	94447727	4996	1	100503393	ENSMUST00000146644.1	-9668	ENSMUSG00000084904	predicted gene 14827
Bicdl2	5.81511	-0.505981	0.0678264	0.486042	Promoter (<=1kb)	23660715	23661114	17	23660506	23668621	8116	1	212733	ENSMUST00000062967.9	209	ENSMUSG00000043782	BICD family like cargo adaptor 2
7530416G11Rik	2.14233	1.57603	0.0678754	0.486052	Intron (ENSMUST00000163242.2/54138, intron 10 of 11)	85461446	85461845	15	85492736	85503227	10492	2	328577	ENSMUST00000178942.1	41382	ENSMUSG00000096607	RIKEN cDNA 7530416G11 gene
Mir3475	1.33525	2.46316	0.067984	0.486462	Intron (ENSMUST00000130153.1/ENSMUST00000130153.1, intron 1 of 1)	140259251	140259650	20	140310948	140311012	65	1	100499512	ENSMUST00000175361.1	-51298	ENSMUSG00000093102	microRNA 3475
Rbm19	1.14466	2.10273	0.0680277	0.486462	Distal Intergenic	120221484	120221883	5	120175725	120197969	22245	1	74111	ENSMUST00000202788.1	45759	ENSMUSG00000029594	RNA binding motif protein 19
Hs6st2	3.86061	-0.863273	0.0680884	0.486556	Promoter (<=1kb)	51679970	51680369	20	51679992	51680565	574	2	50786	ENSMUST00000142983.1	196	ENSMUSG00000062184	heparan sulfate 6-O-sulfotransferase 2
Ube2e3	1.9172	-2.02185	0.068227	0.487206	Intron (ENSMUST00000193021.1/ENSMUST00000193021.1, intron 2 of 4)	78996198	78996597	2	78918393	78920052	1660	1	22193	ENSMUST00000153266.1	77805	ENSMUSG00000027011	ubiquitin-conjugating enzyme E2E 3
Nhsl2	1.55728	2.05125	0.0683024	0.487213	Promoter (<=1kb)	102050980	102051379	20	102050851	102071966	21116	1	100042480	ENSMUST00000144397.1	129	ENSMUSG00000079481	NHS-like 2
Ptprb	2.99634	-1.2548	0.0683231	0.487213	Promoter (<=1kb)	116301553	116301952	10	116301372	116389535	88164	1	19263	ENSMUST00000092167.6	181	ENSMUSG00000020154	protein tyrosine phosphatase, receptor type, B
H2al1j	2.0457	1.77388	0.0685645	0.488058	Distal Intergenic	11591673	11592072	20	11327822	11328151	330	1	236663	ENSMUST00000091180.2	263851	ENSMUSG00000069038	H2A histone family member L1J
Cdkn1c	4.25507	-0.716066	0.0686144	0.488058	Promoter (<=1kb)	143459962	143460361	7	143458822	143460173	1352	2	12577	ENSMUST00000207910.1	0	ENSMUSG00000037664	cyclin-dependent kinase inhibitor 1C (P57)
Wls	1.56305	-2.56812	0.0686416	0.488058	Intron (ENSMUST00000068952.9/68151, intron 2 of 11)	159874405	159874804	3	159839910	159873404	33495	1	68151	ENSMUST00000196276.1	34495	ENSMUSG00000028173	wntless WNT ligand secretion mediator
Gsto1	3.26697	-1.15433	0.0686559	0.488058	Promoter (<=1kb)	47854787	47855186	19	47854970	47864790	9821	1	14873	ENSMUST00000026050.7	0	ENSMUSG00000025068	glutathione S-transferase omega 1
Wwox	3.39837	-0.983555	0.0686801	0.488058	Intron (ENSMUST00000004756.13/80707, intron 8 of 8)	115199565	115199964	8	114712167	115352143	639977	1	80707	ENSMUST00000162052.7	487398	ENSMUSG00000004637	WW domain-containing oxidoreductase
Kcnf1	4.17092	0.608405	0.0687756	0.488065	Promoter (1-2kb)	17175476	17175875	12	17172100	17176888	4789	2	382571	ENSMUST00000170580.2	1013	ENSMUSG00000051726	potassium voltage-gated channel, subfamily F, member 1
Fam83d	2.82793	1.07873	0.0687765	0.488065	Promoter (<=1kb)	158767775	158768174	2	158768093	158786637	18545	1	71878	ENSMUST00000029183.2	0	ENSMUSG00000027654	family with sequence similarity 83, member D
Nhsl2	2.07173	2.14552	0.069016	0.489289	Distal Intergenic	102092505	102092904	20	102072942	102080300	7359	1	100042480	ENSMUST00000129185.1	19563	ENSMUSG00000079481	NHS-like 2
Fancc	2.36717	-1.84977	0.0690446	0.489289	Promoter (<=1kb)	63497888	63498287	13	63347512	63497278	149767	2	14088	ENSMUST00000159024.1	-610	ENSMUSG00000021461	Fanconi anemia, complementation group C
Amot	1.00069	2.53338	0.069174	0.4895	Promoter (1-2kb)	145463434	145463833	20	145459748	145461912	2165	2	27494	ENSMUST00000135832.1	-1522	ENSMUSG00000041688	angiomotin
Asb11	1.35384	2.48853	0.0692871	0.4895	Promoter (2-3kb)	164440408	164440807	20	164438058	164459164	21107	1	68854	ENSMUST00000033755.5	2350	ENSMUSG00000031382	ankyrin repeat and SOCS box-containing 11
Tmem164	2.29541	2.00786	0.0693071	0.4895	Distal Intergenic	142600156	142600555	20	142681406	142843494	162089	1	209497	ENSMUST00000112889.7	-80851	ENSMUSG00000047045	transmembrane protein 164
Nipal1	4.20591	0.710281	0.069405	0.4895	Promoter (<=1kb)	72647705	72648104	5	72647795	72671078	23284	1	70701	ENSMUST00000087212.7	0	ENSMUSG00000067219	NIPA-like domain containing 1
Itga9	1.63574	-2.65937	0.0695824	0.4895	Intron (ENSMUST00000044165.13/104099, intron 18 of 27)	118830051	118830450	9	118839628	118871940	32313	1	104099	ENSMUST00000124422.1	-9178	ENSMUSG00000039115	integrin alpha 9
Unc5b	6.6158	-0.45415	0.0696179	0.4895	Promoter (<=1kb)	60830413	60830812	10	60764577	60831382	66806	2	107449	ENSMUST00000218637.1	570	ENSMUSG00000020099	unc-5 netrin receptor B
Dmrtc1b	2.78818	1.87969	0.0696671	0.4895	Distal Intergenic	102741849	102742248	20	102711177	102715209	4033	1	632708	ENSMUST00000118842.1	30672	ENSMUSG00000073027	DMRT-like family C1b
Epn3	5.14771	-0.566093	0.0697117	0.4895	Promoter (<=1kb)	94499764	94500163	11	94489599	94499974	10376	2	71889	ENSMUST00000127305.1	0	ENSMUSG00000010080	epsin 3
Iqca	2.42587	-1.86898	0.069712	0.4895	Distal Intergenic	90038315	90038714	1	90042140	90054960	12821	2	74918	ENSMUST00000212859.1	16246	ENSMUSG00000026301	IQ motif containing with AAA domain
Hoxb5	8.17989	0.640664	0.0697134	0.4895	Promoter (<=1kb)	96302329	96302728	11	96303512	96306120	2609	1	15413	ENSMUST00000049272.4	-784	ENSMUSG00000038700	homeobox B5
Rabac1	3.62263	0.838153	0.0697238	0.4895	Promoter (<=1kb)	24972439	24972838	7	24969752	24972754	3003	2	14470	ENSMUST00000076961.8	0	ENSMUSG00000003380	Rab acceptor 1 (prenylated)
Kctd17	1.5908	1.87423	0.0697561	0.4895	Promoter (2-3kb)	78436347	78436746	15	78433982	78437579	3598	1	72844	ENSMUST00000162605.1	2365	ENSMUSG00000033287	potassium channel tetramerisation domain containing 17
Mid1	2.98963	1.78595	0.069807	0.4895	Promoter (<=1kb)	169827268	169827667	20	169828159	169990798	162640	1	17318	ENSMUST00000036753.11	-492	ENSMUSG00000035299	midline 1
Gli3	2.01488	-2.04814	0.06981	0.4895	Intron (ENSMUST00000130065.7/14634, intron 2 of 11)	15541691	15542090	13	15463980	15730026	266047	1	14634	ENSMUST00000110510.3	77711	ENSMUSG00000021318	GLI-Kruppel family member GLI3
Mogat2	2.9438	-1.22219	0.0698201	0.4895	Promoter (<=1kb)	99238013	99238412	7	99226577	99238594	12018	2	233549	ENSMUST00000132343.1	182	ENSMUSG00000052396	monoacylglycerol O-acyltransferase 2
Acvr2a	1.613	-2.636	0.0698398	0.4895	Distal Intergenic	47829767	47830166	2	48814109	48903269	89161	1	11480	ENSMUST00000063886.3	-983943	ENSMUSG00000052155	activin receptor IIA
Ddx23	3.25024	0.943072	0.0699146	0.48969	Promoter (<=1kb)	98662717	98663116	15	98645134	98662889	17756	2	74351	ENSMUST00000003450.14	0	ENSMUSG00000003360	DEAD box helicase 23
Srxn1	0.503144	-4.08798	0.0701268	0.490839	Distal Intergenic	152120245	152120644	2	152105524	152111376	5853	1	76650	ENSMUST00000041500.7	14721	ENSMUSG00000032802	sulfiredoxin 1 homolog (S. cerevisiae)
Rcn1	0.495296	-4.07813	0.0702848	0.491609	Intron (ENSMUST00000068813.2/74088, intron 3 of 3)	105333617	105334016	2	105386929	105395348	8420	2	19672	ENSMUST00000127019.1	61332	ENSMUSG00000005973	reticulocalbin 1
1700057H15Rik	1.51423	1.86482	0.0704644	0.492139	Intron (ENSMUST00000143859.7/78460, intron 2 of 3)	124460295	124460694	4	124414416	124451295	36880	2	78460	ENSMUST00000127913.7	-9000	NA	RIKEN cDNA 1700057H15 gene
Tex13b	1.70081	2.19032	0.0705692	0.492139	Distal Intergenic	140825310	140825709	20	140808307	140813433	5127	2	83555	ENSMUST00000044179.7	-11877	ENSMUSG00000042386	testis expressed 13B
Pcdh19	1.2813	2.38817	0.0706009	0.492139	Intron (ENSMUST00000149154.7/279653, intron 3 of 5)	133640046	133640445	20	133681320	133684991	3672	2	279653	ENSMUST00000193485.1	44546	ENSMUSG00000051323	protocadherin 19
Slc25a48	1.46728	-2.49065	0.0706135	0.492139	Intron (ENSMUST00000021971.5/328258, intron 2 of 7)	56448232	56448631	13	56438355	56474239	35885	1	328258	ENSMUST00000021971.5	9877	ENSMUSG00000021509	solute carrier family 25, member 48
Socs2	4.46763	-0.764022	0.0706483	0.492139	Promoter (<=1kb)	95414345	95414744	10	95412420	95414827	2408	2	216233	ENSMUST00000134918.1	83	ENSMUSG00000020027	suppressor of cytokine signaling 2
Nhs	3.06418	1.31185	0.0706491	0.492139	Promoter (<=1kb)	162158446	162158845	20	161836815	162159388	322574	2	195727	ENSMUST00000081569.6	543	ENSMUSG00000059493	NHS actin remodeling regulator
Tlr8	2.02846	2.07989	0.0707204	0.492213	Promoter (1-2kb)	167265506	167265905	20	167245543	167264329	18787	2	170744	ENSMUST00000133722.1	-1177	ENSMUSG00000040522	toll-like receptor 8
A530010L16Rik	2.2225	1.69883	0.070756	0.492213	Intron (ENSMUST00000127664.1/108148, intron 1 of 15)	122739559	122739958	8	122761010	122762761	1752	2	382036	ENSMUST00000212247.1	22803	ENSMUSG00000110682	RIKEN cDNA A530010L16 gene
Gys1	4.11854	-0.703136	0.0709281	0.493076	Promoter (<=1kb)	45434524	45434923	7	45434844	45456619	21776	1	14936	ENSMUST00000003964.16	0	ENSMUSG00000003865	glycogen synthase 1, muscle
Egfl6	1.81428	2.10675	0.0710943	0.493896	Promoter (<=1kb)	166585829	166586228	20	166523007	166585720	62714	2	54156	ENSMUST00000000412.2	-109	ENSMUSG00000000402	EGF-like-domain, multiple 6
Skap2	4.97431	-0.601299	0.07128	0.494027	Distal Intergenic	51848900	51849299	6	51859104	51871929	12826	2	54353	ENSMUST00000205174.1	22630	ENSMUSG00000059182	src family associated phosphoprotein 2
Arhgef9	1.24178	2.33251	0.0713564	0.494027	Intron (ENSMUST00000113876.8/236915, intron 1 of 9)	95131982	95132381	20	95077473	95165825	88353	2	236915	ENSMUST00000198753.4	33444	ENSMUSG00000025656	CDC42 guanine nucleotide exchange factor (GEF) 9
Tmem28	1.24178	2.33251	0.0713564	0.494027	Distal Intergenic	99873595	99873994	20	99821021	99848790	27770	1	620592	ENSMUST00000096363.2	52574	ENSMUSG00000071719	transmembrane protein 28
S100g	1.24178	2.33251	0.0713564	0.494027	Promoter (2-3kb)	162961299	162961698	20	162961992	162964599	2608	2	12309	ENSMUST00000038769.2	2901	ENSMUSG00000040808	S100 calcium binding protein G
Mgmt	1.98706	-2.0354	0.071375	0.494027	Distal Intergenic	136865053	136865452	7	136894614	137130266	235653	1	17314	ENSMUST00000081510.3	-29162	ENSMUSG00000054612	O-6-methylguanine-DNA methyltransferase
Dytn	2.38676	-1.95571	0.0714029	0.494027	Exon (ENSMUST00000090313.4/241073, exon 7 of 15)	63664496	63664895	1	63664220	63686910	22691	2	241073	ENSMUST00000126954.1	22015	ENSMUSG00000069085	dystrotelin
Sh3bp1	4.46072	-0.64292	0.0716234	0.495218	Promoter (<=1kb)	78899801	78900200	15	78899903	78912047	12145	1	20401	ENSMUST00000001226.10	0	ENSMUSG00000022436	SH3-domain binding protein 1
Ppl	2.694	1.14529	0.0717487	0.495749	Intron (ENSMUST00000035672.4/19041, intron 1 of 21)	5121656	5122055	16	5096969	5132410	35442	2	19041	ENSMUST00000230554.1	10355	ENSMUSG00000039457	periplakin
Pdzd2	3.56764	-0.876481	0.0718826	0.496339	Promoter (<=1kb)	12549258	12549657	15	12407282	12549278	141997	2	68070	ENSMUST00000190929.1	0	ENSMUSG00000022197	PDZ domain containing 2
Creb3l1	3.73216	-1.12787	0.071985	0.496506	Intron (ENSMUST00000028663.4/26427, intron 1 of 11)	92008261	92008660	2	91982328	92024502	42175	2	26427	ENSMUST00000028663.4	15842	ENSMUSG00000027230	cAMP responsive element binding protein 3-like 1
Slco3a1	3.05073	1.0774	0.0720534	0.496506	Promoter (1-2kb)	74502176	74502575	7	74359654	74504335	144682	2	108116	ENSMUST00000136389.1	1760	ENSMUSG00000025790	solute carrier organic anion transporter family, member 3a1
Glis3	7.03611	-0.443279	0.0720901	0.496506	Promoter (<=1kb)	28679283	28679682	19	28262364	28679666	417303	2	226075	ENSMUST00000065113.13	0	ENSMUSG00000052942	GLIS family zinc finger 3
Rassf3	4.82564	-0.651057	0.0721009	0.496506	Promoter (<=1kb)	121475424	121475823	10	121410350	121476347	65998	2	192678	ENSMUST00000026902.8	524	ENSMUSG00000025795	Ras association (RalGDS/AF-6) domain family member 3
Ctps2	1.2481	2.34144	0.0723132	0.4976	Distal Intergenic	163188903	163189302	20	162969105	163031319	62215	1	55936	ENSMUST00000112300.1	219798	ENSMUSG00000031360	cytidine 5'-triphosphate synthase 2
Gprc5a	3.3715	-0.929114	0.0723746	0.4976	Promoter (<=1kb)	135065210	135065609	6	135065651	135084709	19059	1	232431	ENSMUST00000050104.7	-42	ENSMUSG00000046733	G protein-coupled receptor, family C, group 5, member A
Degs1	1.92609	1.55213	0.0724056	0.4976	Promoter (<=1kb)	182283299	182283698	1	182278497	182282804	4308	2	13244	ENSMUST00000132551.1	-495	ENSMUSG00000038633	delta(4)-desaturase, sphingolipid 1
Tenm4	2.95426	1.09315	0.0725507	0.498142	Promoter (<=1kb)	96211045	96211444	7	96211671	96908554	696884	1	23966	ENSMUST00000107165.7	-227	ENSMUSG00000048078	teneurin transmembrane protein 4
Rps6ka3	0	4.08489	0.0725818	0.498142	Distal Intergenic	158853845	158854244	20	159210307	159364502	154196	1	110651	ENSMUST00000112493.7	-356063	ENSMUSG00000031309	ribosomal protein S6 kinase polypeptide 3
Phactr1	5.83254	0.582501	0.0726597	0.498343	Distal Intergenic	42659634	42660033	13	42680623	43138524	457902	1	218194	ENSMUST00000128646.7	-20590	ENSMUSG00000054728	phosphatase and actin regulator 1
Arglu1	6.62519	-0.424304	0.072737	0.49838	Distal Intergenic	8855849	8856248	8	8665075	8690521	25447	2	234023	ENSMUST00000048545.9	-165328	ENSMUSG00000040459	arginine and glutamate rich 1
Phka2	3.07199	1.79641	0.0727627	0.49838	Distal Intergenic	160600277	160600676	20	160557787	160562749	4963	1	110094	ENSMUST00000153907.1	42490	ENSMUSG00000031295	phosphorylase kinase alpha 2
Rbms3	2.05859	1.64809	0.0728676	0.498765	Intron (ENSMUST00000111773.9/207181, intron 4 of 14)	116916217	116916616	9	116582822	116822819	239998	2	207181	ENSMUST00000172469.2	-93398	ENSMUSG00000039607	RNA binding motif, single stranded interacting protein
Cd70	3.75063	-0.835345	0.0729388	0.498919	Promoter (<=1kb)	57148601	57149000	17	57145997	57149777	3781	2	21948	ENSMUST00000019633.7	777	ENSMUSG00000019489	CD70 antigen
Nap1l2	1.37477	2.51718	0.0732217	0.500109	Distal Intergenic	103091114	103091513	20	103184176	103186640	2465	2	17954	ENSMUST00000121720.1	95127	ENSMUSG00000082229	nucleosome assembly protein 1-like 2
Slx4ip	2.0718	1.66635	0.0732573	0.500109	Intron (ENSMUST00000028737.12/74243, intron 2 of 5)	136983849	136984248	2	136905543	137069778	164236	1	74243	ENSMUST00000180277.2	78306	ENSMUSG00000027281	SLX4 interacting protein
4632428C04Rik	3.77617	-0.797674	0.0732593	0.500109	Promoter (<=1kb)	30008385	30008784	16	30008667	30021430	12764	1	100043102	ENSMUST00000181485.2	0	ENSMUSG00000097184	RIKEN cDNA 4632428C04 gene
Mast1	4.89013	0.491858	0.0734503	0.501078	Promoter (<=1kb)	84936125	84936524	8	84934924	84937344	2421	2	56527	ENSMUST00000128356.1	820	ENSMUSG00000053693	microtubule associated serine/threonine kinase 1
Sgms2	5.07021	-0.537894	0.0735285	0.501277	Promoter (<=1kb)	131489617	131490016	3	131342169	131490479	148311	2	74442	ENSMUST00000197057.1	463	ENSMUSG00000050931	sphingomyelin synthase 2
Phlda3	3.54459	-1.03453	0.0736561	0.501812	Promoter (<=1kb)	135766242	135766641	1	135766119	135769136	3018	1	27280	ENSMUST00000038945.5	123	ENSMUSG00000041801	pleckstrin homology like domain, family A, member 3
Ttc39a	2.87156	1.23505	0.073705	0.501812	Promoter (<=1kb)	109406724	109407123	4	109407087	109444745	37659	1	230603	ENSMUST00000064129.13	0	ENSMUSG00000028555	tetratricopeptide repeat domain 39A
Lrmda	3.20875	-1.06362	0.0738189	0.50207	Intron (ENSMUST00000075639.10/76633, intron 2 of 6)	22273020	22273419	14	22310165	22584439	274275	1	76633	ENSMUST00000159107.1	-36746	ENSMUSG00000063458	leucine rich melanocyte differentiation associated
Rab40c	4.51012	0.675887	0.073876	0.50207	Promoter (<=1kb)	25919853	25920252	17	25883639	25919727	36089	2	224624	ENSMUST00000167018.7	-126	ENSMUSG00000025730	Rab40C, member RAS oncogene family
Mid1	3.92991	1.59373	0.0739653	0.50207	Distal Intergenic	169568189	169568588	20	169685199	169990795	305597	1	17318	ENSMUST00000112107.7	-116611	ENSMUSG00000035299	midline 1
2010308F09Rik	5.56378	1.57916	0.0739771	0.50207	Promoter (4-5kb)	13243232	13243631	20	13234684	13247736	13053	2	72122	ENSMUST00000186931.1	4105	ENSMUSG00000100714	RIKEN cDNA 2010308F09 gene
Nhs	1.36855	2.50887	0.0739882	0.50207	Distal Intergenic	162224376	162224775	20	161833296	162159730	326435	2	195727	ENSMUST00000087085.9	-64646	ENSMUSG00000059493	NHS actin remodeling regulator
Dtnb	2.21894	-1.69986	0.0740631	0.502245	Distal Intergenic	3789361	3789760	12	3779548	3781398	1851	1	13528	ENSMUST00000174293.1	9813	ENSMUSG00000071454	dystrobrevin, beta
St6gal1	2.37248	-1.87064	0.0743126	0.503603	Promoter (<=1kb)	23226613	23227012	16	23226021	23360350	134330	1	20440	ENSMUST00000178797.7	592	ENSMUSG00000022885	beta galactoside alpha 2,6 sialyltransferase 1
Fitm2	4.16882	-0.700727	0.0745854	0.505117	Distal Intergenic	163481639	163482038	2	163466379	163472629	6251	2	228859	ENSMUST00000109418.1	-9010	ENSMUSG00000048486	fat storage-inducing transmembrane protein 2
Gm1720	2.03894	1.89374	0.0746913	0.5055	Distal Intergenic	166728915	166729314	20	166662025	166689812	27788	1	382255	ENSMUST00000135086.1	66890	ENSMUSG00000086860	predicted gene 1720
Gm15246	2.18051	2.05975	0.0748089	0.505616	Distal Intergenic	169401172	169401571	20	169320622	169368190	47569	1	101055907	ENSMUST00000149873.1	80550	ENSMUSG00000087159	predicted gene 15246
Smyd3	3.83539	-0.967888	0.0748235	0.505616	Exon (ENSMUST00000161017.7/269152, exon 12 of 15)	178917628	178918027	1	178957250	178989345	32096	2	69726	ENSMUST00000129393.1	71318	ENSMUSG00000055067	SET and MYND domain containing 3
Cep170b	3.0436	1.0328	0.0749413	0.505616	Distal Intergenic	112707159	112707558	12	112720455	112724713	4259	1	217882	ENSMUST00000220942.1	-12897	ENSMUSG00000072825	centrosomal protein 170B
Cdkl5	2.34944	2.09175	0.0749425	0.505616	Intron (ENSMUST00000196297.4/382253, intron 13 of 18)	160824378	160824777	20	160799151	160817182	18032	2	382253	ENSMUST00000112355.2	-7196	ENSMUSG00000031292	cyclin-dependent kinase-like 5
4930404H11Rik	2.81289	-1.56983	0.0749702	0.505616	Intron (ENSMUST00000221650.1/ENSMUST00000221650.1, intron 5 of 5)	71479643	71480042	12	71488285	71556133	67849	1	73815	ENSMUST00000222756.1	-8243	ENSMUSG00000113630	RIKEN cDNA 4930404H11 gene
Bend7	3.30354	-1.03704	0.0750791	0.505616	Promoter (<=1kb)	4717100	4717499	2	4717831	4800563	82733	1	209645	ENSMUST00000184139.7	-332	ENSMUSG00000048186	BEN domain containing 7
Mir3086	2.96928	-1.5073	0.0751041	0.505616	Promoter (1-2kb)	58913332	58913731	19	58911673	58911759	87	2	100526480	ENSMUST00000175072.1	-1573	ENSMUSG00000092813	microRNA 3086
Bnip2	3.37121	-1.08389	0.0754084	0.505616	Distal Intergenic	69907287	69907686	9	69989466	70008317	18852	1	12175	ENSMUST00000034754.11	-81780	ENSMUSG00000011958	BCL2/adenovirus E1B interacting protein 2
Pde4c	6.7915	-0.388593	0.0754422	0.505616	Promoter (<=1kb)	70743565	70743964	8	70743079	70750473	7395	1	110385	ENSMUST00000149272.1	486	ENSMUSG00000031842	phosphodiesterase 4C, cAMP specific
Vcan	1.58597	-2.51258	0.0754452	0.505616	Promoter (<=1kb)	89742666	89743065	13	89655312	89742509	87198	2	13003	ENSMUST00000109546.8	-157	ENSMUSG00000021614	versican
Ddx3x	5.35051	1.61433	0.0754764	0.505616	Distal Intergenic	13346194	13346593	20	13287785	13289915	2131	1	13205	ENSMUST00000149639.1	58409	ENSMUSG00000000787	DEAD box helicase 3, X-linked
Esrrb	2.56773	-1.98453	0.0755251	0.505616	Distal Intergenic	86319890	86320289	12	86361117	86521628	160512	1	26380	ENSMUST00000116402.9	-40828	ENSMUSG00000021255	estrogen related receptor, beta
Trpm3	2.71693	-1.44982	0.0755593	0.505616	Promoter (<=1kb)	22138925	22139324	19	22139046	22995410	856365	1	226025	ENSMUST00000237357.1	0	ENSMUSG00000052387	transient receptor potential cation channel, subfamily M, member 3
Nox1	1.95503	2.24922	0.0756629	0.505616	Promoter (4-5kb)	134106340	134106739	20	134087146	134111708	24563	2	237038	ENSMUST00000159259.2	4969	ENSMUSG00000031257	NADPH oxidase 1
Mid1	2.68023	1.86257	0.0756649	0.505616	Distal Intergenic	169586783	169587182	20	169685199	169990795	305597	1	17318	ENSMUST00000112107.7	-98017	ENSMUSG00000035299	midline 1
Atp6v1c2	5.95131	-0.487395	0.0756725	0.505616	Promoter (<=1kb)	17324390	17324789	12	17284721	17324712	39992	2	68775	ENSMUST00000095820.11	0	ENSMUSG00000020566	ATPase, H+ transporting, lysosomal V1 subunit C2
Arhgap29	3.8298	-0.858515	0.0756782	0.505616	Promoter (<=1kb)	121967694	121968093	3	121967829	121992797	24969	1	214137	ENSMUST00000196479.4	0	ENSMUSG00000039831	Rho GTPase activating protein 29
Gm1720	0.0790315	3.06566	0.0756837	0.505616	Distal Intergenic	166776306	166776705	20	166662025	166689812	27788	1	382255	ENSMUST00000135086.1	114281	ENSMUSG00000086860	predicted gene 1720
Ophn1	0.946466	2.46062	0.0756859	0.505616	Promoter (4-5kb)	98885472	98885871	20	98873726	98890384	16659	2	94190	ENSMUST00000140598.1	4513	ENSMUSG00000031214	oligophrenin 1
Tceal8	2.10736	1.67138	0.0756966	0.505616	Promoter (4-5kb)	136176706	136177105	20	136170081	136172342	2262	2	66684	ENSMUST00000060101.9	-4364	ENSMUSG00000051579	transcription elongation factor A (SII)-like 8
Tnfrsf18	6.26096	-0.438275	0.0758115	0.505876	Exon (ENSMUST00000051509.14/330010, exon 15 of 15)	156034999	156035398	4	156028368	156028895	528	1	21936	ENSMUST00000125100.1	6631	ENSMUSG00000041954	tumor necrosis factor receptor superfamily, member 18
4930519F24Rik	0.593378	-4.17446	0.0758834	0.505876	Distal Intergenic	100107236	100107635	9	100023648	100034650	11003	1	108970	ENSMUST00000215896.1	83588	ENSMUSG00000101584	RIKEN cDNA 4930519F24 gene
Wdr11	1.99297	1.53602	0.0759082	0.505876	Distal Intergenic	129654428	129654827	7	129629033	129633671	4639	1	207425	ENSMUST00000136560.2	25395	ENSMUSG00000042055	WD repeat domain 11
Acer2	2.0678	-2.20328	0.0759333	0.505876	Promoter (<=1kb)	86874666	86875065	4	86874414	86932491	58078	1	230379	ENSMUST00000128712.1	252	ENSMUSG00000038007	alkaline ceramidase 2
Tcp11x2	0.979292	2.50522	0.0761849	0.506373	Intron (ENSMUST00000078605.6/71841, intron 2 of 9)	135687950	135688349	20	135654698	135693790	39093	2	71841	ENSMUST00000078605.6	5441	ENSMUSG00000058252	t-complex 11 family, X-linked 2
Map7d2	2.82073	1.93377	0.0761976	0.506373	Promoter (<=1kb)	159459213	159459612	20	159459137	159470093	10957	1	78283	ENSMUST00000156172.2	76	ENSMUSG00000041020	MAP7 domain containing 2
Magee1	6.79499	1.66181	0.0762393	0.506373	Promoter (<=1kb)	105120714	105121113	20	105120378	105123927	3550	1	107528	ENSMUST00000033578.6	336	ENSMUSG00000031227	MAGE family member E1
Prkcz	3.37562	0.809905	0.076304	0.506373	Promoter (<=1kb)	155345138	155345537	4	155290502	155345165	54664	2	18762	ENSMUST00000131975.7	0	ENSMUSG00000029053	protein kinase C, zeta
Gm5089	4.125	-0.936479	0.0763345	0.506373	Intron (ENSMUST00000026625.6/69634, intron 3 of 7)	122375305	122375704	14	122365239	122406743	41505	2	328479	ENSMUST00000228409.1	31039	ENSMUSG00000064052	predicted gene 5089
Mir652	2.13353	1.98665	0.0763646	0.506373	Intron (ENSMUST00000112889.7/209497, intron 2 of 6)	142752203	142752602	20	142739000	142739097	98	1	723976	ENSMUST00000102057.1	13203	ENSMUSG00000076011	microRNA 652
Tmem163	3.41921	0.889754	0.0763734	0.506373	Promoter (1-2kb)	127535256	127535655	1	127491545	127537430	45886	2	72160	ENSMUST00000162406.1	1775	ENSMUSG00000026347	transmembrane protein 163
Pin4	2.0047	2.04336	0.0764038	0.506373	Promoter (<=1kb)	102119724	102120123	20	102119569	102127666	8098	1	69713	ENSMUST00000144367.1	155	ENSMUSG00000079480	protein (peptidyl-prolyl cis/trans isomerase) NIMA-interacting, 4 (parvulin)
Cnksr2	1.89342	2.15786	0.0765175	0.506798	Exon (ENSMUST00000026750.14/245684, exon 20 of 22)	157853314	157853713	20	157858578	157866871	8294	2	245684	ENSMUST00000139664.1	13158	ENSMUSG00000025658	connector enhancer of kinase suppressor of Ras 2
Cacna2d1	7.26637	0.338153	0.0766567	0.507191	Intron (ENSMUST00000167946.8/12293, intron 1 of 38)	15982536	15982935	5	16025714	16268604	242891	1	12293	ENSMUST00000200270.1	-42779	ENSMUSG00000040118	calcium channel, voltage-dependent, alpha2/delta subunit 1
Trim67	5.64066	0.454243	0.0766998	0.507191	Promoter (1-2kb)	124794503	124794902	8	124793092	124834713	41622	1	330863	ENSMUST00000211867.1	1411	ENSMUSG00000036913	tripartite motif-containing 67
Cmtm8	4.50877	-0.56525	0.076741	0.507191	Promoter (<=1kb)	114843940	114844339	9	114789345	114844152	54808	2	70031	ENSMUST00000047013.3	0	ENSMUSG00000041012	CKLF-like MARVEL transmembrane domain containing 8
Gm15246	2.71199	1.91491	0.076775	0.507191	Intron (ENSMUST00000129410.1/ENSMUST00000129410.1, intron 1 of 5)	169467372	169467771	20	169320622	169368190	47569	1	101055907	ENSMUST00000149873.1	146750	ENSMUSG00000087159	predicted gene 15246
Zfp648	6.62128	-0.404623	0.0770736	0.508147	Promoter (3-4kb)	154204818	154205217	1	154201187	154205689	4503	1	100503355	ENSMUST00000086195.6	3631	ENSMUSG00000066797	zinc finger protein 648
Nxt2	1.68044	2.16003	0.0770899	0.508147	Distal Intergenic	142245023	142245422	20	142228703	142239692	10990	1	237082	ENSMUST00000112913.1	16320	ENSMUSG00000042271	nuclear transport factor 2-like export factor 2
Rnf125	3.27622	-1.1306	0.0771997	0.508147	Promoter (<=1kb)	20961252	20961651	18	20961472	20983724	22253	1	67664	ENSMUST00000234316.1	0	ENSMUSG00000033107	ring finger protein 125
Tmem28	2.14393	2.00294	0.0772991	0.508147	Distal Intergenic	99694496	99694895	20	99821021	99848790	27770	1	620592	ENSMUST00000096363.2	-126126	ENSMUSG00000071719	transmembrane protein 28
Jag1	4.34785	-0.663003	0.0773208	0.508147	Promoter (1-2kb)	137114440	137114839	2	137081456	137116644	35189	2	16449	ENSMUST00000028735.7	1805	ENSMUSG00000027276	jagged 1
Ppp1r13b	5.035	-0.512481	0.077323	0.508147	Promoter (<=1kb)	111908380	111908779	12	111828457	111908110	79654	2	21981	ENSMUST00000054815.14	-270	ENSMUSG00000021285	protein phosphatase 1, regulatory subunit 13B
Tmc2	2.74355	-1.5402	0.0773395	0.508147	Intron (ENSMUST00000077988.7/192140, intron 4 of 19)	130211454	130211853	2	130196543	130264217	67675	1	192140	ENSMUST00000166774.2	14911	ENSMUSG00000060332	transmembrane channel-like gene family 2
Maf	2.64692	1.25368	0.0773651	0.508147	Distal Intergenic	116055284	116055683	8	115701435	115707794	6360	2	17132	ENSMUST00000109104.1	-347490	ENSMUSG00000055435	avian musculoaponeurotic fibrosarcoma oncogene homolog
Nhs	1.00801	2.54321	0.0773949	0.508147	Exon (ENSMUST00000119454.1/ENSMUST00000119454.1, exon 1 of 1)	162351441	162351840	20	161833296	162159730	326435	2	195727	ENSMUST00000087085.9	-191711	ENSMUSG00000059493	NHS actin remodeling regulator
Vangl1	3.56116	-1.24866	0.0774163	0.508147	Promoter (1-2kb)	102199904	102200303	3	102184356	102197905	13550	2	229658	ENSMUST00000159586.1	-1999	ENSMUSG00000027860	VANGL planar cell polarity 1
Myo1a	3.69656	0.675162	0.0775513	0.508327	Promoter (1-2kb)	127721139	127721538	10	127719328	127720935	1608	1	432516	ENSMUST00000219882.1	1811	ENSMUSG00000025401	myosin IA
Gpm6b	1.86705	2.11841	0.0775964	0.508327	Intron (ENSMUST00000112235.7/14758, intron 1 of 6)	166363008	166363407	20	166344842	166373287	28446	1	14758	ENSMUST00000129731.1	18166	ENSMUSG00000031342	glycoprotein m6b
Tbc1d8b	1.7099	1.94585	0.077617	0.508327	Intron (ENSMUST00000113027.7/66889, intron 2 of 6)	139650200	139650599	20	139684996	139753405	68410	1	245638	ENSMUST00000096313.3	-34397	ENSMUSG00000042473	TBC1 domain family, member 8B
Prom2	6.7625	-0.347556	0.0777532	0.508327	Promoter (<=1kb)	127541177	127541576	2	127526473	127541467	14995	2	192212	ENSMUST00000028855.13	0	ENSMUSG00000027376	prominin 2
Xist	1.84004	2.07738	0.0777552	0.508327	Intron (ENSMUST00000182089.1/22097, intron 1 of 1)	103457820	103458219	20	103460496	103467256	6761	2	213742	ENSMUST00000153883.3	9037	ENSMUSG00000086503	inactive X specific transcripts
Tmem164	1.51508	1.98791	0.0777692	0.508327	Intron (ENSMUST00000112889.7/209497, intron 6 of 6)	142838676	142839075	20	142825741	142838238	12498	1	209497	ENSMUST00000112888.1	12935	ENSMUSG00000047045	transmembrane protein 164
Metap1d	3.1372	1.01902	0.0777915	0.508327	Distal Intergenic	71445780	71446179	2	71453276	71525191	71916	1	66559	ENSMUST00000037210.8	-7097	ENSMUSG00000041921	methionyl aminopeptidase type 1D (mitochondrial)
Cck	7.62009	-0.339251	0.0779933	0.509081	Promoter (<=1kb)	121494129	121494528	9	121490183	121494510	4328	2	12424	ENSMUST00000217581.1	0	ENSMUSG00000032532	cholecystokinin
Tmem132e	6.92849	-0.420575	0.0780401	0.509081	Promoter (3-4kb)	82434144	82434543	11	82438257	82442899	4643	1	270893	ENSMUST00000202598.1	-3714	ENSMUSG00000020701	transmembrane protein 132E
Ngb	5.00631	-0.70896	0.0780561	0.509081	Promoter (<=1kb)	87102036	87102435	12	87098025	87102350	4326	2	64242	ENSMUST00000110176.1	0	ENSMUSG00000021032	neuroglobin
Nkx6-1	7.75791	0.376149	0.0781654	0.509268	Distal Intergenic	101530320	101530719	5	101658139	101664996	6858	2	18096	ENSMUST00000044125.10	134277	ENSMUSG00000035187	NK6 homeobox 1
Drp2	1.22912	2.31456	0.0781843	0.509268	Intron (ENSMUST00000113228.7/13497, intron 17 of 23)	134445783	134446182	20	134423830	134453400	29571	1	13497	ENSMUST00000000228.4	21953	ENSMUSG00000000223	dystrophin related protein 2
Kcnc2	5.56386	-0.488025	0.0782832	0.509302	Promoter (<=1kb)	112271627	112272026	10	112271121	112466304	195184	1	268345	ENSMUST00000092175.3	506	ENSMUSG00000035681	potassium voltage gated channel, Shaw-related subfamily, member 2
Hlcs	3.03001	-1.29742	0.078289	0.509302	Promoter (3-4kb)	94226413	94226812	16	94134667	94223117	88451	2	110948	ENSMUST00000227698.1	-3296	ENSMUSG00000040820	holocarboxylase synthetase (biotin- [propriony-Coenzyme A-carboxylase (ATP-hydrolysing)] ligase)
Dmrt1	2.35682	1.46498	0.0786113	0.510818	Exon (ENSMUST00000025755.10/50796, exon 3 of 5)	25545741	25546140	19	25505707	25560265	54559	1	50796	ENSMUST00000160814.1	40034	ENSMUSG00000024837	doublesex and mab-3 related transcription factor 1
Arhgap6	1.28762	2.39699	0.078622	0.510818	Distal Intergenic	168747483	168747882	20	168795099	169304435	509337	1	11856	ENSMUST00000033721.12	-47217	ENSMUSG00000031355	Rho GTPase activating protein 6
Phka1	3.04113	1.44513	0.0786872	0.510918	Promoter (<=1kb)	102644239	102644638	20	102513975	102644246	130272	2	18679	ENSMUST00000043596.11	0	ENSMUSG00000034055	phosphorylase kinase alpha 1
Eva1b	7.26073	-0.372756	0.0787422	0.510951	Promoter (<=1kb)	126148859	126149258	4	126148532	126149865	1334	1	230752	ENSMUST00000106150.2	327	ENSMUSG00000050212	eva-1 homolog B (C. elegans)
Gabra1	2.53681	-1.68857	0.0788589	0.51122	Promoter (<=1kb)	42182645	42183044	11	42130939	42182930	51992	2	14394	ENSMUST00000020707.11	0	ENSMUSG00000010803	gamma-aminobutyric acid (GABA) A receptor, subunit alpha 1
Frmpd4	2.16568	2.03681	0.0788896	0.51122	Intron (ENSMUST00000112147.8/333605, intron 3 of 19)	168214410	168214809	20	167475298	168124290	648993	2	333605	ENSMUST00000239138.1	-90120	ENSMUSG00000049176	FERM and PDZ domain containing 4
Itga8	2.29575	1.50757	0.0789336	0.51122	Promoter (<=1kb)	12301333	12301732	2	12286964	12301588	14625	2	241226	ENSMUST00000130548.2	0	ENSMUSG00000026768	integrin alpha 8
Grpr	0.721572	2.85313	0.0790485	0.51164	Distal Intergenic	163654447	163654846	20	163513904	163549677	35774	2	14829	ENSMUST00000033730.2	-104770	ENSMUSG00000031364	gastrin releasing peptide receptor
Gja6	1.84434	2.08392	0.0791725	0.512119	Intron (ENSMUST00000196297.4/382253, intron 2 of 18)	160886123	160886522	20	160902116	160907052	4937	2	414089	ENSMUST00000069417.5	20530	ENSMUSG00000055691	gap junction protein, alpha 6
Eda	1.46523	2.21462	0.0793459	0.512793	Distal Intergenic	99960077	99960476	20	99975606	100311299	335694	1	13607	ENSMUST00000134582.1	-15130	ENSMUSG00000059327	ectodysplasin-A
Lurap1	2.95517	1.03291	0.079377	0.512793	Promoter (<=1kb)	116144089	116144488	4	116132406	116144609	12204	2	68075	ENSMUST00000030469.4	121	ENSMUSG00000028701	leucine rich adaptor protein 1
Bcor	4.04653	1.15034	0.0794799	0.513134	Distal Intergenic	12002077	12002476	20	12036740	12080553	43814	2	71458	ENSMUST00000065143.13	78077	ENSMUSG00000040363	BCL6 interacting corepressor
Platr21	0.913779	2.4158	0.07955	0.513263	Distal Intergenic	139418791	139419190	20	139347491	139357738	10248	2	78526	ENSMUST00000126591.1	-61053	ENSMUSG00000086807	pluripotency associated transcript 21
1700125G02Rik	6.53788	-0.36155	0.079602	0.513275	Promoter (<=1kb)	124893864	124894263	4	124890888	124894782	3895	2	73628	ENSMUST00000154947.1	519	ENSMUSG00000085263	RIKEN cDNA 1700125G02 gene
Scin	5.645	-0.574613	0.0797849	0.513447	Promoter (<=1kb)	40133639	40134038	12	40059769	40134183	74415	2	20259	ENSMUST00000078481.13	145	ENSMUSG00000002565	scinderin
Gpr143	0.987066	2.51569	0.0797992	0.513447	Intron (ENSMUST00000026383.3/18241, intron 8 of 8)	152801138	152801537	20	152782018	152790920	8903	1	18241	ENSMUST00000139310.1	19120	ENSMUSG00000025333	G protein-coupled receptor 143
BB123696	1.77817	-2.71269	0.0798862	0.513447	Promoter (1-2kb)	52755455	52755854	13	52729922	52757205	27284	2	105404	ENSMUST00000223209.1	1351	NA	expressed sequence BB123696
Fam160a2	3.13174	0.885298	0.0799134	0.513447	Promoter (<=1kb)	105400104	105400503	7	105371211	105400054	28844	2	74349	ENSMUST00000179474.8	-50	ENSMUSG00000044465	family with sequence similarity 160, member A2
Cerkl	4.63535	-0.551093	0.079989	0.513447	Promoter (<=1kb)	79428669	79429068	2	79331752	79428954	97203	2	228094	ENSMUST00000099974.9	0	ENSMUSG00000075256	ceramide kinase-like
Tbc1d8b	2.45871	1.85741	0.0800424	0.513447	Intron (ENSMUST00000096313.3/245638, intron 10 of 20)	139730587	139730986	20	139736172	139745243	9072	1	245638	ENSMUST00000123430.1	-5186	ENSMUSG00000042473	TBC1 domain family, member 8B
Slf2	4.16556	0.556769	0.0801653	0.513447	Promoter (<=1kb)	44930940	44931339	19	44931151	44983188	52038	1	226151	ENSMUST00000096053.4	0	ENSMUSG00000036097	SMC5-SMC6 complex localization factor 2
Gm32921	3.62416	-0.823485	0.0801895	0.513447	Promoter (<=1kb)	106320213	106320612	5	106321340	106323217	1878	1	102635633	ENSMUST00000200592.1	-728	ENSMUSG00000105508	predicted gene, 32921
Gm1720	2.76549	1.84201	0.0802102	0.513447	Distal Intergenic	166769390	166769789	20	166662025	166689812	27788	1	382255	ENSMUST00000135086.1	107365	ENSMUSG00000086860	predicted gene 1720
Nrk	2.1474	2.00834	0.0802205	0.513447	Distal Intergenic	139025080	139025479	20	138982718	138989778	7061	1	27206	ENSMUST00000155201.1	42362	ENSMUSG00000052854	Nik related kinase
Alk	4.98067	-0.59082	0.0803195	0.513447	Promoter (<=1kb)	72603262	72603661	17	71868972	72603827	734856	2	11682	ENSMUST00000086639.5	166	ENSMUSG00000055471	anaplastic lymphoma kinase
Ddx3x	2.80918	1.76208	0.0803441	0.513447	Distal Intergenic	13333396	13333795	20	13287785	13289915	2131	1	13205	ENSMUST00000149639.1	45611	ENSMUSG00000000787	DEAD box helicase 3, X-linked
Nacad	2.22383	1.49453	0.0804539	0.513447	Promoter (2-3kb)	6603571	6603970	11	6597823	6606053	8231	2	192950	ENSMUST00000045713.3	2083	ENSMUSG00000041073	NAC alpha domain containing
Rnf39	6.88898	-0.408777	0.0805392	0.513447	Promoter (<=1kb)	36942828	36943227	17	36942918	36947986	5069	1	386454	ENSMUST00000040498.11	0	ENSMUSG00000036492	ring finger protein 39
Prr15l	3.53767	-1.01866	0.0805878	0.513447	Promoter (<=1kb)	96928905	96929304	11	96929302	96935648	6347	1	217138	ENSMUST00000054311.5	0	ENSMUSG00000047040	proline rich 15-like
Frmpd4	0	2.8953	0.0806226	0.513447	Intron (ENSMUST00000238211.1/333605, intron 2 of 16)	167684028	167684427	20	167471309	167855077	383769	2	333605	ENSMUST00000238211.1	170650	ENSMUSG00000049176	FERM and PDZ domain containing 4
Pin4	0.898221	2.39439	0.080623	0.513447	Distal Intergenic	102111831	102112230	20	102119447	102127669	8223	1	69713	ENSMUST00000113627.3	-7217	ENSMUSG00000079480	protein (peptidyl-prolyl cis/trans isomerase) NIMA-interacting, 4 (parvulin)
Cdhr1	2.77984	1.16984	0.0806674	0.513447	Promoter (<=1kb)	37097975	37098374	14	37077857	37098347	20491	2	170677	ENSMUST00000022337.10	0	ENSMUSG00000021803	cadherin-related family member 1
Radx	1.215	2.29438	0.080798	0.513447	Distal Intergenic	139473342	139473741	20	139480367	139554582	74216	1	102871	ENSMUST00000046763.12	-6626	ENSMUSG00000042498	RPA1 related single stranded DNA binding protein, X-linked
Pdha1	1.215	2.29438	0.080798	0.513447	Intron (ENSMUST00000033665.8/270672, intron 19 of 28)	160114080	160114479	20	160127291	160128965	1675	2	18597	ENSMUST00000156531.1	14486	ENSMUSG00000031299	pyruvate dehydrogenase E1 alpha 1
Gm5128	1.17571	2.05447	0.0808293	0.513447	Intron (ENSMUST00000141989.1/ENSMUST00000141989.1, intron 5 of 5)	135339782	135340181	20	135373284	135383226	9943	1	331529	ENSMUST00000113173.7	-33103	ENSMUSG00000094004	predicted gene 5128
Myo10	4.1345	-0.642494	0.0809116	0.513447	Promoter (<=1kb)	25622119	25622518	15	25622525	25813673	191149	1	17909	ENSMUST00000110457.7	-7	ENSMUSG00000022272	myosin X
Frmpd4	0.971509	2.49471	0.0809178	0.513447	Intron (ENSMUST00000238211.1/333605, intron 1 of 16)	167797908	167798307	20	167471309	167855077	383769	2	333605	ENSMUST00000238211.1	56770	ENSMUSG00000049176	FERM and PDZ domain containing 4
Col4a5	0.682375	2.80385	0.0809472	0.513447	Exon (ENSMUST00000112931.7/12830, exon 10 of 53)	141580476	141580875	20	141630124	141689234	59111	1	12830	ENSMUST00000130732.1	-49249	ENSMUSG00000031274	collagen, type IV, alpha 5
Tmem28	2.01605	2.06083	0.0809491	0.513447	Distal Intergenic	99662585	99662984	20	99821021	99848790	27770	1	620592	ENSMUST00000096363.2	-158037	ENSMUSG00000071719	transmembrane protein 28
Cd248	6.78301	-0.348986	0.081005	0.513447	Promoter (<=1kb)	5068382	5068781	19	5068078	5070682	2605	1	70445	ENSMUST00000070630.7	304	ENSMUSG00000056481	CD248 antigen, endosialin
9230105E05Rik	1.45959	-2.48715	0.081068	0.513447	Intron (ENSMUST00000072777.13/15364, intron 3 of 4)	120400027	120400426	10	120389523	120392793	3271	1	320626	ENSMUST00000161291.1	10504	ENSMUSG00000090191	RIKEN cDNA 9230105E05 gene
Rlim	1.47786	2.23311	0.0810877	0.513447	Distal Intergenic	104017571	104017970	20	103977795	103981284	3490	2	19820	ENSMUST00000135101.1	-36287	ENSMUSG00000056537	ring finger protein, LIM domain interacting
Gm14827	2.18396	2.06507	0.0811426	0.513447	Distal Intergenic	94424613	94425012	20	94442732	94447727	4996	1	100503393	ENSMUST00000146644.1	-17720	ENSMUSG00000084904	predicted gene 14827
2900026A02Rik	4.26549	-0.585481	0.0812153	0.513447	Promoter (<=1kb)	113137657	113138056	5	113086323	113137986	51664	2	243219	ENSMUST00000212276.1	0	ENSMUSG00000051339	RIKEN cDNA 2900026A02 gene
Efna2	3.11745	0.878631	0.0812462	0.513447	Distal Intergenic	80190481	80190880	10	80179482	80190010	10529	1	13637	ENSMUST00000003154.6	10999	ENSMUSG00000003070	ephrin A2
Ryr1	3.04208	-1.11532	0.0812483	0.513447	Promoter (<=1kb)	29124978	29125377	7	29003344	29125015	121672	2	20190	ENSMUST00000214374.1	0	ENSMUSG00000030592	ryanodine receptor 1, skeletal muscle
Tle3	1.50586	-2.52653	0.0812921	0.513447	Intron (ENSMUST00000178113.7/21887, intron 4 of 19)	61384338	61384737	9	61375529	61416976	41448	1	21887	ENSMUST00000162127.1	8809	ENSMUSG00000032280	transducin-like enhancer of split 3
Smagp	1.50711	-2.53265	0.0813347	0.513447	Intron (ENSMUST00000066068.6/207818, intron 2 of 3)	100628927	100629326	15	100621719	100635500	13782	2	207818	ENSMUST00000229307.1	6174	ENSMUSG00000053559	small cell adhesion glycoprotein
Gpr143	3.2426	1.447	0.0815104	0.514239	Promoter (<=1kb)	152781975	152782374	20	152781986	152808646	26661	1	18241	ENSMUST00000026383.3	0	ENSMUSG00000025333	G protein-coupled receptor 143
Reps2	0.954243	2.47119	0.0816252	0.514646	Intron (ENSMUST00000154424.7/194590, intron 6 of 15)	162524610	162525009	20	162546220	162552579	6360	2	194590	ENSMUST00000155043.1	27570	ENSMUSG00000040855	RALBP1 associated Eps domain containing protein 2
Foxk1	2.9952	1.02183	0.0819141	0.514925	Intron (ENSMUST00000085774.10/330222, intron 40 of 44)	142179588	142179987	5	142401497	142419620	18124	1	17425	ENSMUST00000198422.1	-221510	ENSMUSG00000056493	forkhead box K1
Ace	3.99492	-0.739203	0.0819968	0.514925	Promoter (<=1kb)	105967618	105968017	11	105967945	105989964	22020	1	11421	ENSMUST00000001963.13	0	ENSMUSG00000020681	angiotensin I converting enzyme (peptidyl-dipeptidase A) 1
Gnal	3.72078	-1.14678	0.082005	0.514925	Promoter (<=1kb)	67088879	67089278	18	67088335	67192846	104512	1	14680	ENSMUST00000236551.1	544	ENSMUSG00000024524	guanine nucleotide binding protein, alpha stimulating, olfactory type
Myo6	2.91007	-1.18374	0.0820111	0.514925	Promoter (<=1kb)	80164556	80164955	9	80165031	80311729	146699	1	17920	ENSMUST00000035889.14	-76	ENSMUSG00000033577	myosin VI
Shisal2b	3.49465	-0.920203	0.0820352	0.514925	Promoter (<=1kb)	104863526	104863925	13	104845283	104863893	18611	2	77803	ENSMUST00000043061.4	0	ENSMUSG00000042655	shisa like 2B
Lncppara	1.06388	1.98729	0.0820603	0.514925	Intron (ENSMUST00000230913.1/102800312, intron 4 of 6)	85695643	85696042	15	85703773	85706660	2888	1	102800312	ENSMUST00000230286.1	-7731	NA	long noncoding RNA near Ppara
Grik3	1.06388	1.98729	0.0820603	0.514925	Distal Intergenic	125425714	125426113	4	125490700	125714173	223474	1	14807	ENSMUST00000030676.7	-64587	ENSMUSG00000001985	glutamate receptor, ionotropic, kainate 3
Map7	5.55465	-0.546992	0.082072	0.514925	Promoter (<=1kb)	20149450	20149849	10	20148998	20257538	108541	1	17761	ENSMUST00000214823.1	452	ENSMUSG00000019996	microtubule-associated protein 7
Foxn2	4.12253	0.657075	0.0821237	0.514934	Intron (ENSMUST00000234514.1/ENSMUST00000234514.1, intron 1 of 1)	88324133	88324532	17	88440711	88490533	49823	1	14236	ENSMUST00000112238.8	-116179	ENSMUSG00000034998	forkhead box N2
Tbx15	1.95156	-1.97926	0.0821827	0.514988	Intron (ENSMUST00000151606.7/21384, intron 1 of 2)	99271786	99272185	3	99253760	99354259	100500	1	21384	ENSMUST00000029462.9	18026	ENSMUSG00000027868	T-box 15
Gm13498	2.5374	-1.6442	0.0825267	0.515911	Distal Intergenic	50812024	50812423	2	50909684	50911849	2166	1	227885	ENSMUST00000119159.1	-97261	ENSMUSG00000083270	heat shock protein 90 alpha (cytosolic), class B member 1 pseudogene
Gm16223	2.48026	-1.5554	0.0826526	0.515911	Intron (ENSMUST00000087332.4/433882, intron 1 of 2)	42107145	42107544	5	42067960	42216798	148839	1	433882	ENSMUST00000087332.4	39185	ENSMUSG00000067285	predicted gene 16223
Oma1	3.25137	1.02938	0.0827337	0.515911	Promoter (1-2kb)	103322270	103322669	4	103324484	103328889	4406	1	67013	ENSMUST00000143399.1	-1815	ENSMUSG00000035069	OMA1 zinc metallopeptidase
Frmpd4	3.65988	1.54337	0.0827494	0.515911	Intron (ENSMUST00000112147.8/333605, intron 3 of 19)	168140794	168141193	20	167475298	168124290	648993	2	333605	ENSMUST00000239138.1	-16504	ENSMUSG00000049176	FERM and PDZ domain containing 4
Gm1720	2.38004	1.92899	0.0827801	0.515911	Distal Intergenic	166852911	166853310	20	166662025	166689812	27788	1	382255	ENSMUST00000135086.1	190886	ENSMUSG00000086860	predicted gene 1720
3110009F21Rik	2.43314	1.2681	0.0827989	0.515911	Distal Intergenic	110191370	110191769	12	110151654	110158077	6424	2	67280	ENSMUST00000223217.1	-33293	ENSMUSG00000113331	RIKEN cDNA 3110009F21 gene
Prps1	2.72251	1.77016	0.0827997	0.515911	Exon (ENSMUST00000208130.1/245643, exon 13 of 15)	140419107	140419506	20	140456613	140465442	8830	1	19139	ENSMUST00000155235.1	-37107	ENSMUSG00000031432	phosphoribosyl pyrophosphate synthetase 1
Sdc3	2.8399	1.14198	0.0828133	0.515911	Promoter (<=1kb)	130791882	130792281	4	130792537	130826319	33783	1	20970	ENSMUST00000070478.3	-256	ENSMUSG00000025743	syndecan 3
Mid1	6.25742	1.56928	0.0829311	0.515911	Promoter (<=1kb)	169879317	169879716	20	169879622	169990798	111177	1	17318	ENSMUST00000112105.7	0	ENSMUSG00000035299	midline 1
Bmx	2.54774	1.81733	0.0829392	0.515911	Promoter (2-3kb)	164253217	164253616	20	164193355	164250368	57014	2	12169	ENSMUST00000112263.1	-2849	ENSMUSG00000031377	BMX non-receptor tyrosine kinase
Triqk	1.73099	1.65281	0.0830024	0.515911	Exon (ENSMUST00000194728.1/ENSMUST00000194728.1, exon 1 of 1)	12630895	12631294	4	12906838	12980873	74036	1	208820	ENSMUST00000143186.7	-275544	ENSMUSG00000055963	triple QxxK/R motif containing
Flt3l	3.10634	-1.17674	0.0830224	0.515911	Promoter (<=1kb)	45136076	45136475	7	45125922	45136231	10310	2	14256	ENSMUST00000209467.1	0	ENSMUSG00000110206	FMS-like tyrosine kinase 3 ligand
Frmpd4	2.12146	1.96798	0.0831002	0.515911	Intron (ENSMUST00000112147.8/333605, intron 3 of 19)	167935503	167935902	20	167471313	167897558	426246	2	333605	ENSMUST00000112145.2	-37945	ENSMUSG00000049176	FERM and PDZ domain containing 4
Nefl	2.79774	-1.61698	0.0831363	0.515911	Intron (ENSMUST00000223853.1/ENSMUST00000223853.1, intron 1 of 2)	68050601	68051000	14	68083863	68089095	5233	1	18039	ENSMUST00000022639.7	-32863	ENSMUSG00000022055	neurofilament, light polypeptide
Srbd1	2.55016	1.14524	0.0831799	0.515911	Intron (ENSMUST00000234707.1/ENSMUST00000234707.1, intron 2 of 2)	85874122	85874521	17	85984947	86040364	55418	2	78586	ENSMUST00000234682.1	165843	ENSMUSG00000024135	S1 RNA binding domain 1
3632454L22Rik	3.05551	1.39056	0.0832096	0.515911	Distal Intergenic	135068183	135068582	20	135023533	135060336	36804	2	320606	ENSMUST00000142907.7	-7847	ENSMUSG00000089759	RIKEN cDNA 3632454L22 gene
Pak3	2.25088	1.93767	0.083393	0.515911	Promoter (3-4kb)	143689822	143690221	20	143693286	143797796	104511	1	18481	ENSMUST00000172330.2	-3065	ENSMUSG00000031284	p21 (RAC1) activated kinase 3
Nfil3	4.79236	0.529786	0.083412	0.515911	Promoter (3-4kb)	52977655	52978054	13	52967209	52981073	13865	2	18030	ENSMUST00000071065.7	3019	ENSMUSG00000056749	nuclear factor, interleukin 3, regulated
Irx2	6.98385	0.512131	0.083414	0.515911	Promoter (1-2kb)	72634593	72634992	13	72632597	72633770	1174	1	16372	ENSMUST00000172353.2	1996	ENSMUSG00000001504	Iroquois homeobox 2
Opn1sw	1.92235	-1.96542	0.0834205	0.515911	Promoter (<=1kb)	29388700	29389099	6	29379373	29388468	9096	2	12057	ENSMUST00000173653.1	-232	ENSMUSG00000058831	opsin 1 (cone pigments), short-wave-sensitive (color blindness, tritan)
Barx1	8.31228	0.451442	0.0834226	0.515911	Promoter (<=1kb)	48662602	48663001	13	48662998	48666507	3510	1	12022	ENSMUST00000021813.4	0	ENSMUSG00000021381	BarH-like homeobox 1
Kifc2	2.41631	1.23821	0.0835024	0.515911	Promoter (<=1kb)	76660465	76660864	15	76660566	76668196	7631	1	16581	ENSMUST00000004294.11	0	ENSMUSG00000004187	kinesin family member C2
Pald1	3.13872	-1.0079	0.0837232	0.515911	Promoter (<=1kb)	61382532	61382931	10	61350950	61381993	31044	2	27355	ENSMUST00000219132.1	-539	ENSMUSG00000020092	phosphatase domain containing, paladin 1
4930554I06Rik	0.367454	-3.96085	0.083798	0.515911	Intron (ENSMUST00000237231.1/ENSMUST00000237231.1, intron 2 of 4)	21163230	21163629	19	21104710	21105538	829	1	75354	ENSMUST00000237768.1	58520	ENSMUSG00000118047	RIKEN cDNA 4930554I06 gene
Zdhhc23	4.12477	-0.732539	0.0839916	0.515911	Promoter (<=1kb)	43979259	43979658	16	43969078	43979162	10085	2	332175	ENSMUST00000232055.1	-97	ENSMUSG00000036304	zinc finger, DHHC domain containing 23
Dupd1	3.48888	-0.894387	0.0840359	0.515911	Intron (ENSMUST00000073870.6/435391, intron 2 of 3)	21686842	21687241	14	21684946	21703102	18157	2	435391	ENSMUST00000224735.1	15861	ENSMUSG00000063821	dual specificity phosphatase and pro isomerase domain containing 1
Oaf	5.02813	-0.593771	0.0840365	0.515911	Promoter (<=1kb)	43238914	43239313	9	43221235	43239911	18677	2	102644	ENSMUST00000034512.6	598	ENSMUSG00000032014	out at first homolog
Pak3	2.45324	1.84848	0.0841606	0.515911	Intron (ENSMUST00000033640.13/18481, intron 1 of 15)	143578930	143579329	20	143518698	143765378	246681	1	18481	ENSMUST00000134402.7	60232	ENSMUSG00000031284	p21 (RAC1) activated kinase 3
Dnaaf6b	1.20235	2.2763	0.0841741	0.515911	Distal Intergenic	140166702	140167101	20	140062879	140106797	43919	1	331537	ENSMUST00000044806.2	103823	ENSMUSG00000042433	dynein axonemal assembly factor 6B
Slc34a2	5.37327	-0.641305	0.0841896	0.515911	Promoter (<=1kb)	53049043	53049442	5	53049352	53071664	22313	1	20531	ENSMUST00000094787.7	0	ENSMUSG00000029188	solute carrier family 34 (sodium phosphate), member 2
Kdm6b	5.33653	-0.537777	0.0841942	0.515911	Exon (ENSMUST00000035539.11/327954, exon 84 of 85)	69421098	69421497	11	69398508	69413675	15168	2	216850	ENSMUST00000094077.4	-7423	ENSMUSG00000018476	KDM1 lysine (K)-specific demethylase 6B
Vsig8	5.95416	-0.484142	0.0841954	0.515911	Promoter (2-3kb)	172561951	172562350	1	172559906	172563716	3811	1	240916	ENSMUST00000177086.1	2045	ENSMUSG00000049598	V-set and immunoglobulin domain containing 8
Lrig1	3.52713	-0.942164	0.0841998	0.515911	Promoter (<=1kb)	94698850	94699249	6	94604536	94700137	95602	2	16206	ENSMUST00000101126.2	888	ENSMUSG00000030029	leucine-rich repeats and immunoglobulin-like domains 1
Ammecr1	2.34829	1.87802	0.0842054	0.515911	Intron (ENSMUST00000041317.2/56068, intron 1 of 5)	142925862	142926261	20	142851146	142966728	115583	2	56068	ENSMUST00000041317.2	40467	ENSMUSG00000042225	Alport syndrome, mental retardation, midface hypoplasia and elliptocytosis chromosomal region gene 1
Trappc2	3.85884	1.40999	0.0843381	0.515911	Promoter (<=1kb)	166440782	166441181	20	166440776	166453138	12363	1	66226	ENSMUST00000112192.7	6	ENSMUSG00000079317	trafficking protein particle complex 2
Sst	5.12367	-0.60092	0.0843575	0.515911	Promoter (<=1kb)	23890441	23890840	16	23889573	23890958	1386	2	20604	ENSMUST00000004480.4	118	ENSMUSG00000004366	somatostatin
Nrk	1.81735	2.04258	0.084358	0.515911	Intron (ENSMUST00000113063.7/60367, intron 6 of 10)	138783827	138784226	20	138914430	139009092	94663	1	27206	ENSMUST00000064937.13	-130204	ENSMUSG00000052854	Nik related kinase
Nxph3	6.59226	-0.469314	0.0843603	0.515911	Promoter (<=1kb)	95513320	95513719	11	95509845	95514570	4726	2	104079	ENSMUST00000058866.7	851	ENSMUSG00000046719	neurexophilin 3
1810053B23Rik	4.31317	-0.573155	0.0844711	0.515911	Distal Intergenic	93292987	93293386	16	93343724	93353189	9466	2	69857	ENSMUST00000185971.6	59803	ENSMUSG00000100277	RIKEN cDNA 1810053B23 gene
Anks1b	5.88388	-0.542382	0.0845166	0.515911	Promoter (1-2kb)	90830994	90831393	10	90829843	90921338	91496	1	77531	ENSMUST00000183145.1	1151	ENSMUSG00000058589	ankyrin repeat and sterile alpha motif domain containing 1B
Flt4	5.65357	-0.485843	0.0845799	0.515911	Exon (ENSMUST00000020617.2/14257, exon 13 of 30)	49634107	49634506	11	49609263	49652739	43477	1	14257	ENSMUST00000020617.2	24844	ENSMUSG00000020357	FMS-like tyrosine kinase 4
Gm38576	2.56912	1.20446	0.0846503	0.515911	Distal Intergenic	84766146	84766545	18	84744067	84754251	10185	1	102641800	ENSMUST00000236805.1	22079	ENSMUSG00000118075	predicted gene, 38576
Bdh1	2.81672	1.20782	0.0847238	0.515911	Promoter (<=1kb)	31429145	31429544	16	31429299	31457222	27924	1	71911	ENSMUST00000115226.7	0	ENSMUSG00000046598	3-hydroxybutyrate dehydrogenase, type 1
Gm1720	1.82165	2.04919	0.0847351	0.515911	Distal Intergenic	166848088	166848487	20	166662025	166689812	27788	1	382255	ENSMUST00000135086.1	186063	ENSMUSG00000086860	predicted gene 1720
Mapkapk2	2.82527	-1.28812	0.0848156	0.515911	Exon (ENSMUST00000191688.1/ENSMUST00000191688.1, exon 1 of 1)	131091184	131091583	1	131053700	131097826	44127	2	17164	ENSMUST00000016672.10	6243	ENSMUSG00000016528	MAP kinase-activated protein kinase 2
Slc30a10	4.91934	-0.568824	0.0848456	0.515911	Promoter (<=1kb)	185454977	185455376	1	185455038	185468762	13725	1	226781	ENSMUST00000238677.1	0	ENSMUSG00000026614	solute carrier family 30, member 10
Dock5	4.577	-0.651271	0.0849694	0.515911	Promoter (<=1kb)	67932931	67933330	14	67752135	67933432	181298	2	68813	ENSMUST00000039135.5	102	ENSMUSG00000044447	dedicator of cytokinesis 5
Lhx1os	4.20419	-0.666309	0.0850104	0.515911	Distal Intergenic	84562959	84563358	11	84525684	84535830	10147	1	78365	ENSMUST00000128121.1	37275	ENSMUSG00000087211	LIM homeobox 1, opposite strand
Tbc1d16	2.16469	-1.63973	0.0850313	0.515911	Exon (ENSMUST00000036113.3/207592, exon 3 of 12)	119209108	119209507	11	119210641	119221976	11336	2	207592	ENSMUST00000125856.1	12469	ENSMUSG00000039976	TBC1 domain family, member 16
Nub1	3.35378	0.803776	0.0850607	0.515911	Promoter (<=1kb)	24685447	24685846	5	24685532	24710376	24845	1	53312	ENSMUST00000197407.4	0	ENSMUSG00000028954	negative regulator of ubiquitin-like proteins 1
Drd4	7.77304	-0.371436	0.085075	0.515911	Promoter (<=1kb)	141293455	141293854	7	141293131	141294093	963	1	13491	ENSMUST00000209649.1	324	ENSMUSG00000025496	dopamine receptor D4
Gm8817	1.69668	2.18454	0.0850834	0.515911	Distal Intergenic	167138672	167139071	20	167063336	167070380	7045	2	667794	ENSMUST00000126769.7	-68292	ENSMUSG00000086008	predicted gene 8817
Scml2	1.38554	2.53188	0.0851391	0.515911	Intron (ENSMUST00000238603.1/107815, intron 10 of 11)	161189213	161189612	20	161163060	161255659	92600	1	107815	ENSMUST00000077375.4	26153	ENSMUSG00000000037	Scm polycomb group protein like 2
Slc32a1	7.61391	0.351134	0.0851455	0.515911	Promoter (1-2kb)	158611904	158612303	2	158610767	158615748	4982	1	22348	ENSMUST00000045738.4	1137	ENSMUSG00000037771	solute carrier family 32 (GABA vesicular transporter), member 1
Nhsl2	2.61126	1.92102	0.0852321	0.515911	Intron (ENSMUST00000125115.1/100042480, intron 1 of 1)	101935415	101935814	20	101961797	102077881	116085	1	100042480	ENSMUST00000155477.1	-25983	ENSMUSG00000079481	NHS-like 2
Ppp1r37	1.8396	-1.94045	0.0852947	0.515911	Promoter (<=1kb)	19532054	19532453	7	19531069	19531803	735	2	232947	ENSMUST00000208678.1	-251	ENSMUSG00000051403	protein phosphatase 1, regulatory subunit 37
Skap1	2.74344	1.09355	0.0853459	0.515911	Intron (ENSMUST00000103154.10/78473, intron 11 of 12)	96736215	96736614	11	96708235	96713202	4968	1	78473	ENSMUST00000123814.1	27980	ENSMUSG00000057058	src family associated phosphoprotein 1
Armcx1	2.54013	1.80472	0.0853475	0.515911	Promoter (<=1kb)	134717602	134718001	20	134717963	134721908	3946	1	78248	ENSMUST00000113201.7	0	ENSMUSG00000033460	armadillo repeat containing, X-linked 1
Spr	4.38036	-0.635737	0.0854011	0.515911	Exon (ENSMUST00000203386.1/ENSMUST00000203386.1, exon 1 of 3)	85125924	85126323	6	85133687	85137756	4070	2	20751	ENSMUST00000174769.1	11433	ENSMUSG00000033735	sepiapterin reductase
Tnni1	3.5867	-1.03909	0.08543	0.515911	Intron (ENSMUST00000132795.7/21952, intron 2 of 6)	135793565	135793964	1	135799402	135810989	11588	1	21952	ENSMUST00000152208.7	-5438	ENSMUSG00000026418	troponin I, skeletal, slow 1
8430422H06Rik	3.46804	-1.22002	0.0854644	0.515911	Intron (ENSMUST00000234218.1/74529, intron 2 of 3)	14250142	14250541	18	14232309	14278542	46234	1	74529	ENSMUST00000234218.1	17833	ENSMUSG00000117633	RIKEN cDNA 8430422H06 gene
Tex13a	1.52386	2.29964	0.0854659	0.515911	Intron (ENSMUST00000113063.7/60367, intron 2 of 10)	138005494	138005893	20	138208165	138209580	1416	2	67944	ENSMUST00000096314.2	203687	ENSMUSG00000071686	testis expressed 13A
Tll1	4.3431	-0.623658	0.0857049	0.515911	Promoter (1-2kb)	64204318	64204717	8	64014931	64205993	191063	2	21892	ENSMUST00000066166.5	1276	ENSMUSG00000053626	tolloid-like
Rbm41	1.44155	2.17979	0.0857344	0.515911	Intron (ENSMUST00000087400.11/237073, intron 4 of 6)	139980390	139980789	20	139967581	139994082	26502	2	237073	ENSMUST00000138635.7	13293	ENSMUSG00000031433	RNA binding motif protein 41
Chrdl1	1.44155	2.17979	0.0857344	0.515911	Exon (ENSMUST00000063029.12/83453, exon 11 of 11)	143287123	143287522	20	143285674	143390099	104426	2	83453	ENSMUST00000063029.12	102577	ENSMUSG00000031283	chordin-like 1
Ammecr1	2.10996	1.76428	0.0857532	0.515911	Distal Intergenic	143020345	143020744	20	142851146	142966728	115583	2	56068	ENSMUST00000041317.2	-53617	ENSMUSG00000042225	Alport syndrome, mental retardation, midface hypoplasia and elliptocytosis chromosomal region gene 1
Tlr8	1.96306	1.97885	0.0857541	0.515911	Intron (ENSMUST00000112170.1/170744, intron 2 of 2)	167255494	167255893	20	167242732	167263788	21057	2	170744	ENSMUST00000049023.2	7895	ENSMUSG00000040522	toll-like receptor 8
Pak3	2.71496	1.7575	0.0857685	0.515911	Intron (ENSMUST00000033640.13/18481, intron 1 of 15)	143543778	143544177	20	143518698	143765378	246681	1	18481	ENSMUST00000134402.7	25080	ENSMUSG00000031284	p21 (RAC1) activated kinase 3
Mir3108	2.81628	-1.32119	0.0858594	0.515911	Intron (ENSMUST00000220518.1/11906, intron 10 of 15)	108902131	108902530	8	108936860	108936938	79	1	100526511	ENSMUST00000175500.1	-34330	ENSMUSG00000093241	microRNA 3108
Cyp1a1	5.86412	-0.538094	0.0859229	0.515911	Promoter (<=1kb)	57696530	57696929	9	57697613	57703824	6212	1	13076	ENSMUST00000034865.5	-684	ENSMUSG00000032315	cytochrome P450, family 1, subfamily a, polypeptide 1
Esyt3	6.38385	-0.378359	0.0860016	0.515911	Promoter (<=1kb)	99358157	99358556	9	99309963	99358518	48556	2	272636	ENSMUST00000042158.12	0	ENSMUSG00000037681	extended synaptotagmin-like protein 3
Irs4	3.23376	1.60827	0.0860367	0.515911	Distal Intergenic	141960318	141960717	20	141710998	141725263	14266	2	16370	ENSMUST00000067841.7	-235055	ENSMUSG00000054667	insulin receptor substrate 4
H2-T3	8.34107	-0.440988	0.0860765	0.515911	Exon (ENSMUST00000173047.3/ENSMUST00000173047.3, exon 2 of 5)	36215764	36216163	17	36185573	36190287	4715	2	15043	ENSMUST00000102675.9	-25477	ENSMUSG00000054128	histocompatibility 2, T region locus 3
Pyy	7.23705	-0.305736	0.0861026	0.515911	Promoter (<=1kb)	102107064	102107463	11	102106680	102107416	737	2	217212	ENSMUST00000127381.2	0	ENSMUSG00000017311	peptide YY
Prrx2	5.65891	-0.600471	0.0861263	0.515911	Promoter (<=1kb)	30845752	30846151	2	30845444	30878657	33214	1	20204	ENSMUST00000150299.1	308	ENSMUSG00000039476	paired related homeobox 2
Gucy2f	2.10614	1.94372	0.0861814	0.515911	Distal Intergenic	142016765	142017164	20	142081160	142196931	115772	2	245650	ENSMUST00000042530.3	179767	ENSMUSG00000042282	guanylate cyclase 2f
Rnf220	1.91755	1.54587	0.0862519	0.515911	Intron (ENSMUST00000030439.14/66743, intron 2 of 14)	117357543	117357942	4	117271927	117375457	103531	2	66743	ENSMUST00000094853.8	17515	ENSMUSG00000028677	ring finger protein 220
Arvcf	3.13522	0.894516	0.0863442	0.515911	Promoter (<=1kb)	18348524	18348923	16	18348274	18407074	58801	1	11877	ENSMUST00000090103.10	250	ENSMUSG00000000325	armadillo repeat gene deleted in velocardiofacial syndrome
Tmem178b	3.08828	1.09527	0.086376	0.515911	Promoter (<=1kb)	39872007	39872406	6	39871461	40245772	374312	1	434008	ENSMUST00000239008.1	546	ENSMUSG00000057716	transmembrane protein 178B
Tmem28	0.873507	2.36004	0.0864061	0.515911	Distal Intergenic	99809821	99810220	20	99821021	99848790	27770	1	620592	ENSMUST00000096363.2	-10801	ENSMUSG00000071719	transmembrane protein 28
Pde8a	5.67707	-0.54957	0.0864973	0.515911	Promoter (<=1kb)	81213631	81214030	7	81213596	81334533	120938	1	18584	ENSMUST00000026672.7	35	ENSMUSG00000025584	phosphodiesterase 8A
6530402F18Rik	6.76986	-0.386755	0.086573	0.515911	Promoter (1-2kb)	29251316	29251715	2	29245107	29252993	7887	2	76220	ENSMUST00000155949.1	1278	ENSMUSG00000079499	RIKEN cDNA 6530402F18 gene
Frmpd4	2.53451	1.79536	0.0865992	0.515911	Intron (ENSMUST00000112147.8/333605, intron 3 of 19)	168359608	168360007	20	167473973	168448042	974070	2	333605	ENSMUST00000238709.1	88035	ENSMUSG00000049176	FERM and PDZ domain containing 4
Pcca	1.98293	-2.07599	0.0866397	0.515911	Promoter (<=1kb)	122874743	122875142	14	122875935	122891100	15166	1	110821	ENSMUST00000140517.1	-793	ENSMUSG00000041650	propionyl-Coenzyme A carboxylase, alpha polypeptide
Thsd4	3.66051	0.728328	0.0867042	0.515911	Promoter (<=1kb)	60521190	60521589	9	60428226	60522046	93821	2	207596	ENSMUST00000140824.1	457	ENSMUSG00000032289	thrombospondin, type I, domain containing 4
Asb9	2.09897	1.93235	0.0869317	0.515911	Intron (ENSMUST00000033756.2/69299, intron 1 of 6)	164513281	164513680	20	164506327	164539752	33426	1	69299	ENSMUST00000033756.2	6954	ENSMUSG00000031384	ankyrin repeat and SOCS box-containing 9
Grpr	0.865744	2.34924	0.0869865	0.515911	Distal Intergenic	163597339	163597738	20	163513904	163549677	35774	2	14829	ENSMUST00000033730.2	-47662	ENSMUSG00000031364	gastrin releasing peptide receptor
Ccn3	4.33722	-0.646209	0.0870115	0.515911	Promoter (<=1kb)	54746086	54746485	15	54745702	54754039	8338	1	18133	ENSMUST00000050027.8	384	ENSMUSG00000037362	cellular communication network factor 3
Gprasp2	1.9629	1.77239	0.0870324	0.515911	Promoter (<=1kb)	135838868	135839267	20	135839034	135841796	2763	1	245607	ENSMUST00000134986.7	0	ENSMUSG00000072966	G protein-coupled receptor associated sorting protein 2
Ugt8a	3.07154	1.1342	0.0870839	0.515911	Promoter (<=1kb)	125937788	125938187	3	125914266	125938551	24286	2	22239	ENSMUST00000196481.1	364	ENSMUSG00000032854	UDP galactosyltransferase 8A
Fancb	2.12966	1.98091	0.0871162	0.515911	Distal Intergenic	165005690	165006089	20	164980712	164997272	16561	1	237211	ENSMUST00000057150.7	24978	ENSMUSG00000047757	Fanconi anemia, complementation group B
Hes1	1.82166	1.58672	0.0871451	0.515911	Distal Intergenic	30102158	30102557	16	30066338	30067319	982	1	15205	ENSMUST00000161839.1	35820	ENSMUSG00000022528	hes family bHLH transcription factor 1
Frmpd4	3.15428	1.69608	0.0871602	0.515911	Promoter (2-3kb)	167894949	167895348	20	167471313	167897558	426246	2	333605	ENSMUST00000112145.2	2210	ENSMUSG00000049176	FERM and PDZ domain containing 4
Fgf20	6.43325	-0.37832	0.0871836	0.515911	Promoter (<=1kb)	40286147	40286546	8	40279166	40286953	7788	2	80857	ENSMUST00000034014.13	407	ENSMUSG00000031603	fibroblast growth factor 20
Col9a3	3.45433	0.787821	0.0872148	0.515911	Promoter (<=1kb)	180598195	180598594	2	180598222	180622185	23964	1	12841	ENSMUST00000103059.1	0	ENSMUSG00000027570	collagen, type IX, alpha 3
Prps1	0.516483	2.59289	0.0872204	0.515911	Distal Intergenic	140476389	140476788	20	140456613	140476140	19528	1	19139	ENSMUST00000033809.3	19776	ENSMUSG00000031432	phosphoribosyl pyrophosphate synthetase 1
Scml2	0.516483	2.59289	0.0872204	0.515911	Promoter (<=1kb)	161116042	161116441	20	161117193	161256900	139708	1	107815	ENSMUST00000101113.8	-752	ENSMUSG00000000037	Scm polycomb group protein like 2
Fes	3.48375	-0.927745	0.0873439	0.516224	Promoter (<=1kb)	80387317	80387716	7	80377773	80387419	9647	2	14159	ENSMUST00000206728.1	0	ENSMUSG00000053158	feline sarcoma oncogene
Mettl15	3.1209	-1.30637	0.0874327	0.516224	Distal Intergenic	108757013	108757412	2	109092300	109278280	185981	2	76894	ENSMUST00000147376.7	520868	ENSMUSG00000057234	methyltransferase like 15
H2al1j	2.35604	1.5829	0.0874659	0.516224	Distal Intergenic	11491183	11491582	20	11327822	11328151	330	1	236663	ENSMUST00000091180.2	163361	ENSMUSG00000069038	H2A histone family member L1J
Epb41l2	2.80793	-1.53443	0.0875033	0.516224	Promoter (<=1kb)	25465719	25466118	10	25466973	25502027	35055	1	13822	ENSMUST00000219138.1	-855	ENSMUSG00000019978	erythrocyte membrane protein band 4.1 like 2
Gpr143	1.68036	2.16027	0.087566	0.516224	Intron (ENSMUST00000151819.7/18241, intron 4 of 4)	152793714	152794113	20	152782018	152790920	8903	1	18241	ENSMUST00000139310.1	11696	ENSMUSG00000025333	G protein-coupled receptor 143
Tchh	6.35224	-0.381483	0.0875975	0.516224	Promoter (1-2kb)	93443734	93444133	3	93442330	93449077	6748	1	99681	ENSMUST00000064257.5	1404	ENSMUSG00000052415	trichohyalin
Ankrd33b	7.15024	-0.324453	0.0876265	0.516224	Promoter (<=1kb)	31366826	31367225	15	31293186	31367532	74347	2	67434	ENSMUST00000156679.1	307	ENSMUSG00000022237	ankyrin repeat domain 33B
Zfp64	5.57632	-0.564892	0.0878759	0.516994	Distal Intergenic	168841634	168842033	2	168906842	168912633	5792	2	22722	ENSMUST00000124599.1	70600	ENSMUSG00000027551	zinc finger protein 64
3930402G23Rik	2.31734	1.66154	0.0879087	0.516994	Distal Intergenic	10938528	10938927	8	10924427	10928696	4270	2	665306	ENSMUST00000040608.4	-9832	ENSMUSG00000038917	RIKEN cDNA 3930402G23 gene
Gm5643	0.506356	2.57971	0.0879231	0.516994	Distal Intergenic	142288623	142289022	20	142297565	142298530	966	1	434858	ENSMUST00000117081.1	-8543	NA	heterogeneous nuclear ribonucleoprotein A1 pseudogene
Dnajb5	3.01188	0.926188	0.0880101	0.516994	Promoter (<=1kb)	42949560	42949959	4	42949814	42959425	9612	1	56323	ENSMUST00000037872.9	0	ENSMUSG00000036052	DnaJ heat shock protein family (Hsp40) member B5
Hmga2	3.02107	-1.33936	0.0880982	0.516994	Distal Intergenic	120564652	120565051	10	120361275	120476469	115195	2	15364	ENSMUST00000159699.1	-88183	ENSMUSG00000056758	high mobility group AT-hook 2
Dab1	2.29456	1.298	0.0881881	0.516994	Intron (ENSMUST00000143294.7/13131, intron 1 of 3)	103633406	103633805	4	103619665	104680382	1060718	1	13131	ENSMUST00000106827.7	13741	ENSMUSG00000028519	disabled 1
Kash5	3.72741	-0.980748	0.0882136	0.516994	Promoter (<=1kb)	45204418	45204817	7	45183624	45204892	21269	2	384619	ENSMUST00000121017.4	75	ENSMUSG00000038292	KASH domain containing 5
Card10	6.45222	-0.363824	0.0882378	0.516994	Promoter (<=1kb)	78802301	78802700	15	78776493	78802669	26177	2	105844	ENSMUST00000170584.1	0	ENSMUSG00000033170	caspase recruitment domain family, member 10
Nxph2	2.75257	-1.50114	0.08825	0.516994	Promoter (<=1kb)	23321163	23321562	2	23321246	23401973	80728	1	18232	ENSMUST00000102945.1	0	ENSMUSG00000069132	neurexophilin 2
Stat5a	5.98888	-0.559021	0.0882623	0.516994	Promoter (<=1kb)	100860536	100860935	11	100860485	100877308	16824	1	20850	ENSMUST00000154087.1	51	ENSMUSG00000004043	signal transducer and activator of transcription 5A
C230079O03Rik	6.30329	-0.544463	0.0883221	0.517048	Distal Intergenic	136494984	136495383	7	136332216	136349415	17200	2	330664	ENSMUST00000209560.1	-145569	ENSMUSG00000109633	RIKEN cDNA C230079O03 gene
Rnf128	2.17023	1.68285	0.0886735	0.518026	Promoter (<=1kb)	139563120	139563519	20	139563316	139673138	109823	1	66889	ENSMUST00000113027.7	0	ENSMUSG00000031438	ring finger protein 128
Smad2	4.83024	-0.58274	0.088693	0.518026	Distal Intergenic	76378177	76378576	18	76262492	76302642	40151	1	17126	ENSMUST00000113930.2	115685	ENSMUSG00000024563	SMAD family member 2
Gm10578	2.93058	-1.49821	0.0886946	0.518026	Promoter (4-5kb)	137229330	137229729	7	137234683	137240366	5684	1	100038555	ENSMUST00000209747.1	-4954	ENSMUSG00000109722	predicted gene 10578
Tmem164	2.77995	1.71204	0.0887276	0.518026	Promoter (<=1kb)	142682366	142682765	20	142682888	142771290	88403	1	209497	ENSMUST00000124211.1	-123	ENSMUSG00000047045	transmembrane protein 164
Mir676	1.99232	2.02417	0.0887929	0.518026	Intron (ENSMUST00000134582.1/13607, intron 1 of 1)	100234309	100234708	20	100381097	100381185	89	1	751534	ENSMUST00000102443.1	-146389	ENSMUSG00000076398	microRNA 676
Rnf138rt1	1.99232	2.02417	0.0887929	0.518026	Distal Intergenic	163676284	163676683	20	163760139	163761329	1191	2	74264	ENSMUST00000059320.3	84646	ENSMUSG00000083695	ring finger protein 138, retrogene 1
Cyp26c1	2.04463	1.78716	0.0889849	0.518042	Intron (ENSMUST00000238954.1/107371, intron 21 of 22)	37654151	37654550	19	37685581	37693398	7818	1	546726	ENSMUST00000073391.4	-31031	ENSMUSG00000062432	cytochrome P450, family 26, subfamily c, polypeptide 1
Limk1	2.85866	-1.4146	0.0889937	0.518042	Promoter (<=1kb)	134688721	134689120	5	134656039	134688598	32560	2	16885	ENSMUST00000015137.9	-123	ENSMUSG00000029674	LIM-domain containing, protein kinase
Pak3	2.35051	1.88159	0.0890185	0.518042	Intron (ENSMUST00000033640.13/18481, intron 1 of 15)	143529861	143530260	20	143518698	143765378	246681	1	18481	ENSMUST00000134402.7	11163	ENSMUSG00000031284	p21 (RAC1) activated kinase 3
1700017B05Rik	2.69219	-1.51464	0.0890309	0.518042	Promoter (<=1kb)	57261984	57262383	9	57253610	57262547	8938	2	74211	ENSMUST00000215298.1	164	ENSMUSG00000032300	RIKEN cDNA 1700017B05 gene
Pkp2	4.87739	-0.52184	0.0891411	0.518042	Promoter (1-2kb)	16215085	16215484	16	16213318	16272712	59395	1	67451	ENSMUST00000039408.2	1767	ENSMUSG00000041957	plakophilin 2
Hoxd11	9.53783	0.660276	0.0891854	0.518042	Promoter (1-2kb)	74680630	74681029	2	74679557	74687016	7460	1	15431	ENSMUST00000048086.8	1073	ENSMUSG00000042499	homeobox D11
Cask	1.21061	2.28869	0.0892383	0.518042	Intron (ENSMUST00000156096.7/12361, intron 16 of 23)	13552672	13553071	20	13533340	13559331	25992	2	12361	ENSMUST00000139735.2	6260	ENSMUSG00000031012	calcium/calmodulin-dependent serine protein kinase (MAGUK family)
Ldlrap1	5.62938	-0.48559	0.0892459	0.518042	Promoter (<=1kb)	134767500	134767899	4	134741554	134768024	26471	2	100017	ENSMUST00000037828.7	125	ENSMUSG00000037295	low density lipoprotein receptor adaptor protein 1
Kcnk3	6.43917	-0.530005	0.0892935	0.518042	Promoter (1-2kb)	30622419	30622818	5	30621373	30622232	860	1	16527	ENSMUST00000197428.1	1046	ENSMUSG00000049265	potassium channel, subfamily K, member 3
Pcdh1	2.28386	1.38296	0.0893018	0.518042	Exon (ENSMUST00000160721.7/75599, exon 5 of 5)	38188993	38189392	18	38188890	38203163	14274	2	75599	ENSMUST00000161701.2	13771	ENSMUSG00000051375	protocadherin 1
Mir670	3.08573	0.907579	0.0894426	0.518564	Distal Intergenic	94273605	94274004	2	94261300	94261399	100	2	735259	ENSMUST00000102380.1	-12206	ENSMUSG00000076335	microRNA 670
Lamb1	7.00976	-0.362267	0.0896202	0.519182	Promoter (<=1kb)	31265990	31266389	12	31265297	31266793	1497	1	16777	ENSMUST00000170495.1	693	ENSMUSG00000002900	laminin B1
Gas8	2.35858	1.27079	0.0896506	0.519182	Promoter (<=1kb)	123518183	123518582	8	123518834	123536650	17817	1	104346	ENSMUST00000093043.6	-252	ENSMUSG00000040220	growth arrest specific 8
Itih5l-ps	2.4383	1.82389	0.0897178	0.519277	Intron (ENSMUST00000145639.7/634882, intron 2 of 12)	150832513	150832912	20	150826972	150856940	29969	1	634882	ENSMUST00000145639.7	5541	ENSMUSG00000087149	inter-alpha (globulin) inhibitor H5-like, pseudogene
Tmc5	4.43377	-0.603532	0.0899888	0.519523	Promoter (<=1kb)	118597096	118597495	7	118597297	118675085	77789	1	74424	ENSMUST00000098088.10	0	ENSMUSG00000030650	transmembrane channel-like gene family 5
Zic4	2.56902	-1.61066	0.0900004	0.519523	Intron (ENSMUST00000191272.1/ENSMUST00000191272.1, intron 1 of 2)	91456800	91457199	9	91382410	91388044	5635	1	22774	ENSMUST00000085242.4	74390	ENSMUSG00000036972	zinc finger protein of the cerebellum 4
4930554I06Rik	1.53087	-2.45503	0.0900204	0.519523	Intron (ENSMUST00000237231.1/ENSMUST00000237231.1, intron 2 of 4)	21160269	21160668	19	21104710	21105538	829	1	75354	ENSMUST00000237768.1	55559	ENSMUSG00000118047	RIKEN cDNA 4930554I06 gene
Gm13133	1.53087	-2.45503	0.0900204	0.519523	Promoter (1-2kb)	154552165	154552564	4	154550282	154557645	7364	1	102634405	ENSMUST00000143888.1	1883	ENSMUSG00000086565	predicted gene 13133
Galnt6	6.76354	-0.388494	0.0900555	0.519523	Promoter (<=1kb)	100729329	100729728	15	100691813	100729376	37564	2	207839	ENSMUST00000159715.7	0	ENSMUSG00000037280	polypeptide N-acetylgalactosaminyltransferase 6
Nap1l2	3.3214	1.38539	0.0900649	0.519523	Promoter (<=1kb)	103186196	103186595	20	103184176	103186640	2465	2	17954	ENSMUST00000121720.1	45	ENSMUSG00000082229	nucleosome assembly protein 1-like 2
Gpr25	5.78394	-0.469662	0.0903954	0.520999	Promoter (<=1kb)	136260601	136261000	1	136259797	136260873	1077	2	383563	ENSMUST00000086395.6	0	ENSMUSG00000052759	G protein-coupled receptor 25
Arvcf	2.07364	1.56952	0.0904715	0.520999	Promoter (<=1kb)	18402974	18403373	16	18403449	18404458	1010	1	11877	ENSMUST00000152132.1	-76	ENSMUSG00000000325	armadillo repeat gene deleted in velocardiofacial syndrome
Lmo2	5.36061	-0.504155	0.0904734	0.520999	Promoter (<=1kb)	103970627	103971026	2	103971179	103980916	9738	1	16909	ENSMUST00000133210.1	-153	ENSMUSG00000032698	LIM domain only 2
Batf3	3.03039	-1.36212	0.0905619	0.521215	Promoter (<=1kb)	191098261	191098660	1	191098325	191108943	10619	1	381319	ENSMUST00000027943.5	0	ENSMUSG00000026630	basic leucine zipper transcription factor, ATF-like 3
Spaca7	3.06925	1.01365	0.0906398	0.521341	Distal Intergenic	12502206	12502605	8	12573029	12600744	27716	1	78634	ENSMUST00000210276.1	-70424	ENSMUSG00000010435	sperm acrosome associated 7
Six4	6.0166	-0.491183	0.0906857	0.521341	Promoter (2-3kb)	73110802	73111201	12	73099609	73113425	13817	2	20474	ENSMUST00000043208.7	2224	ENSMUSG00000034460	sine oculis-related homeobox 4
Phka2	2.86016	1.70226	0.0908059	0.521739	Intron (ENSMUST00000071204.11/237178, intron 15 of 15)	160623850	160624249	20	160557787	160562749	4963	1	110094	ENSMUST00000153907.1	66063	ENSMUSG00000031295	phosphorylase kinase alpha 2
Hibadh	3.82295	0.788334	0.0909044	0.521821	Intron (ENSMUST00000031788.8/58875, intron 4 of 7)	52584297	52584696	6	52548852	52556915	8064	2	58875	ENSMUST00000149471.1	-27382	ENSMUSG00000029776	3-hydroxyisobutyrate dehydrogenase
Tbc1d8b	2.08367	1.9079	0.0909332	0.521821	Intron (ENSMUST00000096313.3/245638, intron 7 of 20)	139717802	139718201	20	139736172	139745243	9072	1	245638	ENSMUST00000123430.1	-17971	ENSMUSG00000042473	TBC1 domain family, member 8B
Itga11	6.81785	-0.39364	0.0909733	0.521821	Promoter (<=1kb)	62677681	62678080	9	62677826	62783982	106157	1	319480	ENSMUST00000034774.8	0	ENSMUSG00000032243	integrin alpha 11
Awat2	2.42423	1.65379	0.0910531	0.521987	Promoter (4-5kb)	100417347	100417746	20	100402221	100412587	10367	2	245532	ENSMUST00000033567.14	-4760	ENSMUSG00000031220	acyl-CoA wax alcohol acyltransferase 2
Nanos1	2.77142	1.15322	0.0911759	0.522167	Promoter (<=1kb)	60756882	60757281	19	60755987	60759914	3928	1	332397	ENSMUST00000088237.5	895	ENSMUSG00000072437	nanos C2HC-type zinc finger 1
Scml4	2.36592	1.38344	0.0912534	0.522167	Promoter (<=1kb)	42864441	42864840	10	42865514	42930419	64906	1	268297	ENSMUST00000136841.1	-674	ENSMUSG00000044770	Scm polycomb group protein like 4
Igdcc4	2.75718	1.13103	0.0912565	0.522167	Promoter (<=1kb)	65101971	65102370	9	65101535	65135580	34046	1	56741	ENSMUST00000166273.1	436	ENSMUSG00000032816	immunoglobulin superfamily, DCC subclass, member 4
Nt5e	5.6249	-0.539214	0.0912998	0.522167	Promoter (<=1kb)	88327503	88327902	9	88327633	88367844	40212	1	23959	ENSMUST00000187166.1	0	ENSMUSG00000032420	5' nucleotidase, ecto
Mir6384	0.85798	2.33842	0.0914467	0.522167	Intron (ENSMUST00000069360.13/14734, intron 7 of 7)	52278750	52279149	20	52378121	52378181	61	2	102465202	ENSMUST00000196833.1	99032	ENSMUSG00000105738	microRNA 6384
Gm10451	3.05587	-1.06726	0.091499	0.522167	Intron (ENSMUST00000063977.8/210762, intron 6 of 10)	76435140	76435539	12	76444497	76448660	4164	1	100041694	ENSMUST00000219367.1	-8958	ENSMUSG00000073000	predicted gene 10451
Mid1	1.8213	2.04909	0.0915701	0.522167	Distal Intergenic	169600587	169600986	20	169685199	169990795	305597	1	17318	ENSMUST00000112107.7	-84213	ENSMUSG00000035299	midline 1
Snx12	2.21563	1.88144	0.0916005	0.522167	Intron (ENSMUST00000156473.7/55988, intron 4 of 5)	101197888	101198287	20	101213487	101214539	1053	2	55988	ENSMUST00000130826.1	16252	ENSMUSG00000046032	sorting nexin 12
Dlg3	2.09083	1.91934	0.0916239	0.522167	Distal Intergenic	100819043	100819442	20	100808000	100814830	6831	1	53310	ENSMUST00000146772.1	11043	ENSMUSG00000000881	discs large MAGUK scaffold protein 3
1700055C04Rik	4.81247	-0.522758	0.0916869	0.522167	Distal Intergenic	64060284	64060683	9	64038465	64041465	3001	2	73397	ENSMUST00000176450.1	-18819	ENSMUSG00000093616	RIKEN cDNA 1700055C04 gene
Gprin1	0.21333	-3.81373	0.0916985	0.522167	Promoter (<=1kb)	54750107	54750506	13	54736671	54749874	13204	2	26913	ENSMUST00000135343.1	-233	ENSMUSG00000069227	G protein-regulated inducer of neurite outgrowth 1
Ebf1	3.13709	-1.03389	0.0918178	0.522167	Intron (ENSMUST00000109268.1/13591, intron 6 of 15)	44806617	44807016	11	44912138	44972914	60777	1	13591	ENSMUST00000140822.1	-105122	ENSMUSG00000057098	early B cell factor 1
Katnb1	2.66916	1.09957	0.0919074	0.522167	Promoter (<=1kb)	95080623	95081022	8	95081186	95100211	19026	1	74187	ENSMUST00000034239.8	-164	ENSMUSG00000031787	katanin p80 (WD40-containing) subunit B 1
Wdr7	2.87024	1.15552	0.0919315	0.522167	Intron (ENSMUST00000072726.6/104082, intron 20 of 27)	63855649	63856048	18	63777972	63865290	87319	1	104082	ENSMUST00000235428.1	77677	ENSMUSG00000040560	WD repeat domain 7
Insm1	6.18301	0.418679	0.0920381	0.522167	Promoter (4-5kb)	146226556	146226955	2	146221921	146225020	3100	1	53626	ENSMUST00000089257.5	4635	ENSMUSG00000068154	insulinoma-associated 1
Arpc1b	4.45971	-0.558536	0.0920892	0.522167	Promoter (<=1kb)	145114637	145115036	5	145114316	145122635	8320	1	11867	ENSMUST00000141602.1	321	ENSMUSG00000029622	actin related protein 2/3 complex, subunit 1B
Rasgef1b	1.89644	-2.01739	0.0921017	0.522167	Intron (ENSMUST00000209346.1/320292, intron 3 of 16)	99468710	99469109	5	99217426	99252927	35502	2	320292	ENSMUST00000168092.7	-215783	ENSMUSG00000089809	RasGEF domain family, member 1B
Sh3kbp1	1.79772	2.0127	0.0921157	0.522167	Intron (ENSMUST00000112456.8/58194, intron 8 of 17)	159890577	159890976	20	159919859	159973319	53461	1	58194	ENSMUST00000152426.1	-28883	ENSMUSG00000040990	SH3-domain kinase binding protein 1
Slc22a12	3.49223	0.773703	0.0921885	0.522167	Exon (ENSMUST00000113462.7/18190, exon 23 of 23)	6531974	6532373	19	6536065	6541549	5485	2	20521	ENSMUST00000129698.1	9176	ENSMUSG00000061742	solute carrier family 22 (organic anion/cation transporter), member 12
Ets1	3.33277	0.82516	0.0922507	0.522167	Distal Intergenic	32592267	32592666	9	32636221	32729830	93610	1	23871	ENSMUST00000183879.1	-43555	ENSMUSG00000032035	E26 avian leukemia oncogene 1, 5' domain
1700025C18Rik	4.27131	0.608466	0.0922632	0.522167	Exon (ENSMUST00000065438.12/104010, exon 12 of 12)	165111935	165112334	2	165078693	165090750	12058	2	72211	ENSMUST00000109304.1	-21185	ENSMUSG00000078935	RIKEN cDNA 1700025C18 gene
Tceal1	0.423344	2.46997	0.0922811	0.522167	Distal Intergenic	136716201	136716600	20	136707982	136711478	3497	1	237052	ENSMUST00000055104.5	8219	ENSMUSG00000049536	transcription elongation factor A (SII)-like 1
Frmpd4	0.423344	2.46997	0.0922811	0.522167	Intron (ENSMUST00000112147.8/333605, intron 3 of 19)	167919036	167919435	20	167471313	167897558	426246	2	333605	ENSMUST00000112145.2	-21478	ENSMUSG00000049176	FERM and PDZ domain containing 4
Frem3	4.50074	0.533129	0.0923092	0.522167	Promoter (<=1kb)	80611103	80611502	8	80611080	80695356	84277	1	333315	ENSMUST00000039695.6	23	ENSMUSG00000042353	Fras1 related extracellular matrix protein 3
Uprt	2.0236	2.07242	0.0924683	0.52249	Promoter (2-3kb)	104485811	104486210	20	104482818	104507490	24673	1	331487	ENSMUST00000087867.5	2993	ENSMUSG00000073016	uracil phosphoribosyltransferase
Gm15246	2.0236	2.07242	0.0924683	0.52249	Intron (ENSMUST00000156210.7/101055907, intron 5 of 5)	169358377	169358776	20	169320622	169368190	47569	1	101055907	ENSMUST00000149873.1	37755	ENSMUSG00000087159	predicted gene 15246
Mir124-2hg	4.18656	-0.685144	0.0925816	0.522681	Promoter (2-3kb)	17786669	17787068	3	17789921	17800073	10153	1	70441	ENSMUST00000188983.6	-2853	ENSMUSG00000100252	Mir124-2 host gene (non-protein coding)
Cldn34a	1.79326	2.00579	0.0926044	0.522681	Distal Intergenic	152596586	152596985	20	152563334	152563969	636	1	635396	ENSMUST00000164764.1	33252	ENSMUSG00000091863	claudin 34A
Sdk2	7.01221	-0.36118	0.0929166	0.523992	Promoter (<=1kb)	114065095	114065494	11	113848562	114065975	217414	2	237979	ENSMUST00000141943.1	481	ENSMUSG00000041592	sidekick cell adhesion molecule 2
Jakmip1	4.08613	-0.586709	0.0929869	0.523992	Exon (ENSMUST00000173836.7/76071, exon 3 of 3)	37090807	37091206	5	37085370	37148001	62632	1	76071	ENSMUST00000174629.1	5437	ENSMUSG00000063646	janus kinase and microtubule interacting protein 1
Phf8	0.413289	2.45658	0.0929903	0.523992	Intron (ENSMUST00000073364.5/207375, intron 9 of 15)	151433014	151433413	20	151520672	151570807	50136	1	320595	ENSMUST00000112666.7	-87259	ENSMUSG00000041229	PHD finger protein 8
Celrr	7.65182	0.300548	0.0930844	0.524234	Exon (ENSMUST00000185678.1/98452, exon 3 of 3)	121177880	121178279	1	121087529	121088932	1404	1	98452	ENSMUST00000181183.2	90351	ENSMUSG00000097881	cerebellum expressed regulatory RNA
Ctbp2	3.18987	-1.03466	0.0932737	0.525011	Promoter (<=1kb)	133124441	133124840	7	133025702	133124354	98653	2	13017	ENSMUST00000171882.7	-87	ENSMUSG00000030970	C-terminal binding protein 2
Crh	3.8762	-0.700807	0.0934052	0.525462	Promoter (<=1kb)	19694581	19694980	3	19693401	19695396	1996	2	12918	ENSMUST00000061294.4	416	ENSMUSG00000049796	corticotropin releasing hormone
Hspa12a	3.35373	-0.935492	0.0936278	0.526073	Promoter (<=1kb)	58859769	58860168	19	58827556	58860638	33083	2	73442	ENSMUST00000236839.1	470	ENSMUSG00000025092	heat shock protein 12A
Amelx	1.84439	1.85594	0.0937221	0.526073	Promoter (4-5kb)	169182498	169182897	20	169176114	169187200	11087	2	11704	ENSMUST00000066112.11	4303	ENSMUSG00000031354	amelogenin, X-linked
Egfem1	3.07968	-1.13547	0.0938397	0.526073	Promoter (<=1kb)	29081962	29082361	3	29082023	29153601	71579	1	75740	ENSMUST00000124809.7	0	ENSMUSG00000063600	EGF-like and EMI domain containing 1
Dgkz	7.16518	-0.309207	0.0938718	0.526073	Promoter (<=1kb)	91975989	91976388	2	91932824	91975864	43041	2	104418	ENSMUST00000099709.9	-125	ENSMUSG00000040479	diacylglycerol kinase zeta
Vinac1	4.43283	-0.56882	0.093901	0.526073	Exon (ENSMUST00000145798.3/668894, exon 3 of 7)	129038948	129039347	2	129025073	129048172	23100	2	668894	ENSMUST00000145798.3	8825	ENSMUSG00000079051	vinculin/alpha-catenin family member 1
Ctps2	1.14762	2.19777	0.0939036	0.526073	Distal Intergenic	163112045	163112444	20	162969105	163031319	62215	1	55936	ENSMUST00000112300.1	142940	ENSMUSG00000031360	cytidine 5'-triphosphate synthase 2
Mir6934	0.546132	2.14238	0.0939644	0.526073	Intron (ENSMUST00000036113.3/207592, intron 3 of 11)	119178376	119178775	11	119154076	119154137	62	2	102465563	ENSMUST00000183965.1	-24239	ENSMUSG00000098704	microRNA 6934
Tcf21	8.40777	0.367624	0.0940154	0.526073	Promoter (2-3kb)	22817713	22818112	10	22817281	22820174	2894	2	21412	ENSMUST00000049930.8	2062	ENSMUSG00000045680	transcription factor 21
4930441J16Rik	2.8752	0.971046	0.0940839	0.526073	Distal Intergenic	74210288	74210687	2	74298940	74307717	8778	2	73962	ENSMUST00000153743.1	97030	ENSMUSG00000085405	RIKEN cDNA 4930441J16 gene
H2al1j	0	2.76106	0.0940998	0.526073	Distal Intergenic	11416932	11417331	20	11327822	11328151	330	1	236663	ENSMUST00000091180.2	89110	ENSMUSG00000069038	H2A histone family member L1J
Bhlhb9	1.60199	2.04181	0.09417	0.526073	Promoter (1-2kb)	135799075	135799474	20	135797594	135890864	93271	1	70237	ENSMUST00000207433.1	1481	ENSMUSG00000072964	basic helix-loop-helix domain containing, class B9
Msx2	1.21799	1.86998	0.0941852	0.526073	Distal Intergenic	53500830	53501229	13	53466884	53473074	6191	2	17702	ENSMUST00000021922.9	-27756	ENSMUSG00000021469	msh homeobox 2
Nrk	1.94243	1.94633	0.0942369	0.526073	Intron (ENSMUST00000113063.7/60367, intron 7 of 10)	138791019	138791418	20	138914430	139009092	94663	1	27206	ENSMUST00000064937.13	-123012	ENSMUSG00000052854	Nik related kinase
Pak3	2.23626	1.91465	0.0942768	0.526073	Intron (ENSMUST00000033640.13/18481, intron 1 of 15)	143648021	143648420	20	143664290	143797792	133503	1	18481	ENSMUST00000112868.7	-15870	ENSMUSG00000031284	p21 (RAC1) activated kinase 3
Pcdh19	1.80218	2.0196	0.0943273	0.526073	Intron (ENSMUST00000149154.7/279653, intron 3 of 5)	133646901	133647300	20	133681320	133684991	3672	2	279653	ENSMUST00000193485.1	37691	ENSMUSG00000051323	protocadherin 19
Tnxb	8.481	-0.381532	0.0943363	0.526073	Promoter (1-2kb)	34672051	34672450	17	34670535	34719815	49281	1	81877	ENSMUST00000238305.1	1516	ENSMUSG00000033327	tenascin XB
Smpx	0.239138	3.25125	0.094399	0.526101	Intron (ENSMUST00000038007.9/66106, intron 4 of 5)	157732403	157732802	20	157720426	157752283	31858	1	66106	ENSMUST00000126418.1	11977	ENSMUSG00000041476	small muscle protein, X-linked
Wnk2	3.5575	0.716702	0.0944442	0.526101	Promoter (<=1kb)	49146386	49146785	13	49036309	49147232	110924	2	75607	ENSMUST00000162403.7	447	ENSMUSG00000037989	WNK lysine deficient protein kinase 2
Svil	3.28286	0.932282	0.0945468	0.526386	Promoter (<=1kb)	4920456	4920855	18	4920540	5119291	198752	1	225115	ENSMUST00000126977.7	0	ENSMUSG00000024236	supervillin
B230110C06Rik	3.38901	-0.960278	0.0947062	0.526416	Promoter (<=1kb)	15438292	15438691	14	15438184	15451883	13700	1	77981	ENSMUST00000181936.2	108	ENSMUSG00000097547	RIKEN cDNA B230110C06 gene
Ppef1	1.60694	2.04938	0.0947548	0.526416	Intron (ENSMUST00000071204.11/237178, intron 6 of 15)	160671967	160672366	20	160693571	160719936	26366	2	237178	ENSMUST00000136888.1	47570	ENSMUSG00000062168	protein phosphatase with EF hand calcium-binding domain 1
Cldn4	6.41849	-0.376239	0.0947686	0.526416	Promoter (<=1kb)	134946214	134946613	5	134945119	134946934	1816	2	12740	ENSMUST00000051401.3	321	ENSMUSG00000047501	claudin 4
Epb41l4b	3.49727	-0.800189	0.0947788	0.526416	Intron (ENSMUST00000095076.9/54357, intron 6 of 25)	57082814	57083213	4	57063030	57070559	7530	2	54357	ENSMUST00000150665.1	-12255	ENSMUSG00000028434	erythrocyte membrane protein band 4.1 like 4b
Lingo1	6.34073	-0.371259	0.0948572	0.526416	Promoter (<=1kb)	56634717	56635116	9	56619088	56635628	16541	2	235402	ENSMUST00000114256.1	512	ENSMUSG00000049556	leucine rich repeat and Ig domain containing 1
Plcb2	3.47706	0.74648	0.0948872	0.526416	Promoter (<=1kb)	118728578	118728977	2	118707517	118728438	20922	2	18796	ENSMUST00000102524.7	-140	ENSMUSG00000040061	phospholipase C, beta 2
Cpm	6.99947	-0.351855	0.0949123	0.526416	Promoter (<=1kb)	117629121	117629520	10	117629500	117635373	5874	1	70574	ENSMUST00000138020.7	0	ENSMUSG00000020183	carboxypeptidase M
Scml2	2.76909	1.69337	0.0953297	0.527883	Promoter (3-4kb)	161242217	161242616	20	161246257	161258196	11940	1	107815	ENSMUST00000238361.1	-3641	ENSMUSG00000000037	Scm polycomb group protein like 2
Sh3kbp1	1.63796	2.09658	0.095357	0.527883	Intron (ENSMUST00000112456.8/58194, intron 3 of 17)	159789241	159789640	20	159840468	159975664	135197	1	58194	ENSMUST00000112451.7	-50828	ENSMUSG00000040990	SH3-domain kinase binding protein 1
Opa1	3.20244	0.906197	0.0955646	0.527883	Distal Intergenic	29723266	29723665	16	29616625	29618707	2083	1	74143	ENSMUST00000160101.1	106641	ENSMUSG00000038084	OPA1, mitochondrial dynamin like GTPase
Bcor	2.58333	1.56897	0.0956828	0.527883	Distal Intergenic	11862077	11862476	20	12036740	12080553	43814	2	71458	ENSMUST00000065143.13	218077	ENSMUSG00000040363	BCL6 interacting corepressor
Tha1	2.54329	1.19614	0.0957227	0.527883	Distal Intergenic	117888979	117889378	11	117867952	117873481	5530	2	71776	ENSMUST00000153989.1	-15498	ENSMUSG00000017713	threonine aldolase 1
Thsd4	2.97124	0.994696	0.0958885	0.527883	Intron (ENSMUST00000171654.7/207596, intron 2 of 16)	60457689	60458088	9	59966931	60497126	530196	2	207596	ENSMUST00000171654.7	39038	ENSMUSG00000032289	thrombospondin, type I, domain containing 4
Eno4	1.44355	-2.44046	0.0958943	0.527883	Intron (ENSMUST00000163821.2/71653, intron 14 of 14)	58991883	58992282	19	58955456	58970933	15478	1	226265	ENSMUST00000201123.1	36427	ENSMUSG00000048029	enolase 4
Gm715	1.44355	-2.44046	0.0958943	0.527883	Intron (ENSMUST00000152669.1/ENSMUST00000152669.1, intron 3 of 11)	60565950	60566349	20	60548019	60548849	831	1	279618	ENSMUST00000117865.1	17931	ENSMUSG00000082226	predicted gene 715
Gm4750	1.77419	1.97604	0.0959077	0.527883	Promoter (4-5kb)	152496666	152497065	20	152489661	152491860	2200	2	207318	ENSMUST00000140208.1	-4806	ENSMUSG00000087235	actin, beta pseudogene
Fgf13	2.22299	1.42954	0.0959207	0.527883	Promoter (<=1kb)	59133774	59134173	20	59062145	59134436	72292	2	14168	ENSMUST00000033473.11	263	ENSMUSG00000031137	fibroblast growth factor 13
Supt5	1.89535	-1.99652	0.0959479	0.527883	Promoter (2-3kb)	28341149	28341548	7	28314891	28338746	23856	2	20924	ENSMUST00000207563.1	-2403	ENSMUSG00000003435	suppressor of Ty 5, DSIF elongation factor subunit
Nhsl2	2.1983	1.85331	0.0960619	0.527883	Intron (ENSMUST00000125115.1/100042480, intron 1 of 1)	101870274	101870673	20	101849385	102092055	242671	1	100042480	ENSMUST00000101339.7	20889	ENSMUSG00000079481	NHS-like 2
Zdhhc15	2.1983	1.85331	0.0960619	0.527883	Distal Intergenic	104677545	104677944	20	104536969	104671064	134096	2	108672	ENSMUST00000042070.5	-6481	ENSMUSG00000033906	zinc finger, DHHC domain containing 15
Sema4f	3.54834	0.79929	0.0961155	0.527883	Promoter (<=1kb)	82939059	82939458	6	82918601	82939545	20945	2	20355	ENSMUST00000203271.1	87	ENSMUSG00000000627	sema domain, immunoglobulin domain (Ig), TM domain, and short cytoplasmic domain
Morc4	1.82575	2.05592	0.0961482	0.527883	Downstream (<1kb)	139888599	139888998	20	139821904	139871677	49774	2	75746	ENSMUST00000087401.11	-16922	ENSMUSG00000031434	microrchidia 4
Lrmda	2.90386	-1.13135	0.0962765	0.527883	Intron (ENSMUST00000075639.10/76633, intron 2 of 6)	22074273	22074672	14	22019848	23056085	1036238	1	76633	ENSMUST00000162540.1	54425	ENSMUSG00000063458	leucine rich melanocyte differentiation associated
Tmem51os1	5.74296	-0.450503	0.0962779	0.527883	Promoter (<=1kb)	142084128	142084527	4	142084298	142088099	3802	1	100038693	ENSMUST00000141769.7	0	ENSMUSG00000073728	Tmem51 opposite strand 1
Sfr1	2.73238	-1.22301	0.0962974	0.527883	Promoter (<=1kb)	47731487	47731886	19	47731682	47735588	3907	1	67788	ENSMUST00000099353.5	0	ENSMUSG00000025066	SWI5 dependent recombination repair 1
Unc5c	0.217851	2.3393	0.0963787	0.527883	Intron (ENSMUST00000106236.8/22253, intron 1 of 15)	141594461	141594860	3	141465671	141830538	364868	1	22253	ENSMUST00000142762.1	128790	ENSMUSG00000059921	unc-5 netrin receptor C
Kcnt1	4.47145	-0.52529	0.0963879	0.527883	Promoter (<=1kb)	25864872	25865271	2	25863968	25916117	52150	1	227632	ENSMUST00000200434.4	904	ENSMUSG00000058740	potassium channel, subfamily T, member 1
Pak3	0	2.69072	0.0964174	0.527883	Intron (ENSMUST00000033640.13/18481, intron 1 of 15)	143624534	143624933	20	143664290	143797792	133503	1	18481	ENSMUST00000112868.7	-39357	ENSMUSG00000031284	p21 (RAC1) activated kinase 3
Grpr	0	2.69072	0.0964174	0.527883	Intron (ENSMUST00000033730.2/14829, intron 1 of 2)	163540550	163540949	20	163513904	163549677	35774	2	14829	ENSMUST00000033730.2	8728	ENSMUSG00000031364	gastrin releasing peptide receptor
Gm1720	0	2.69072	0.0964174	0.527883	Distal Intergenic	166692328	166692727	20	166662025	166689812	27788	1	382255	ENSMUST00000135086.1	30303	ENSMUSG00000086860	predicted gene 1720
Tlr8	0	2.69072	0.0964174	0.527883	Distal Intergenic	167277276	167277675	20	167245543	167264329	18787	2	170744	ENSMUST00000133722.1	-12947	ENSMUSG00000040522	toll-like receptor 8
Cbarp	4.63321	0.577739	0.0965131	0.527883	Promoter (<=1kb)	80136962	80137361	10	80136663	80137352	690	2	100503659	ENSMUST00000128465.7	0	ENSMUSG00000035640	calcium channel, voltage-dependent, beta subunit associated regulatory protein
Foxo1	5.24974	-0.620215	0.0966136	0.527883	Promoter (<=1kb)	52269279	52269678	3	52268336	52353221	84886	1	56458	ENSMUST00000053764.6	943	ENSMUSG00000044167	forkhead box O1
2310005E17Rik	5.09512	-0.569339	0.0966293	0.527883	Promoter (4-5kb)	98430174	98430573	13	98424109	98435065	10957	2	70090	ENSMUST00000186644.1	4492	ENSMUSG00000099446	RIKEN cDNA 2310005E17 gene
Ap1s2	1.97096	1.99169	0.0967072	0.527883	Distal Intergenic	163874222	163874621	20	163909017	163933666	24650	1	108012	ENSMUST00000069041.14	-34396	ENSMUSG00000031367	adaptor-related protein complex 1, sigma 2 subunit
Map1a	2.55903	1.20501	0.0967217	0.527883	Promoter (<=1kb)	121296239	121296638	2	121295463	121307621	12159	1	17754	ENSMUST00000133283.1	776	ENSMUSG00000027254	microtubule-associated protein 1 A
Gls2	5.06676	0.452768	0.0967277	0.527883	Promoter (<=1kb)	128194987	128195386	10	128194806	128199815	5010	1	216456	ENSMUST00000152928.1	181	ENSMUSG00000044005	glutaminase 2 (liver, mitochondrial)
Hs3st3a1	0.141744	-3.76159	0.0968487	0.527883	Intron (ENSMUST00000058652.5/15478, intron 1 of 1)	64488563	64488962	11	64435332	64522841	87510	1	15478	ENSMUST00000058652.5	53231	ENSMUSG00000047759	heparan sulfate (glucosamine) 3-O-sulfotransferase 3A1
Nrxn2	0.141744	-3.76159	0.0968487	0.527883	Promoter (<=1kb)	6445303	6445702	19	6445460	6473353	27894	1	18190	ENSMUST00000157014.7	0	ENSMUSG00000033768	neurexin II
Arhgap20	3.80404	0.655666	0.0968908	0.527883	Promoter (<=1kb)	51765841	51766240	9	51765660	51850651	84992	1	244867	ENSMUST00000130405.1	181	ENSMUSG00000053199	Rho GTPase activating protein 20
Gm11762	8.05285	-0.36386	0.0969508	0.527883	Promoter (<=1kb)	119549049	119549448	11	119548630	119569046	20417	1	100503830	ENSMUST00000135630.1	419	ENSMUSG00000087675	predicted gene 11762
4930519K11Rik	5.78073	-0.491034	0.0969823	0.527883	Promoter (<=1kb)	24003372	24003771	14	24003844	24008335	4492	1	78019	ENSMUST00000223609.1	-73	ENSMUSG00000114953	RIKEN cDNA 4930519K11 gene
Hps6	3.8362	-0.828851	0.0970643	0.528048	Promoter (<=1kb)	46003472	46003871	19	46003508	46006173	2666	1	20170	ENSMUST00000099393.3	0	ENSMUSG00000074811	HPS6, biogenesis of lysosomal organelles complex 2 subunit 3
Fendrr	2.22221	1.26328	0.0972155	0.528174	Intron (ENSMUST00000127664.1/108148, intron 1 of 15)	120936854	120937253	8	121058803	121060413	1611	2	68790	ENSMUST00000181231.1	123160	ENSMUSG00000097336	Foxf1 adjacent non-coding developmental regulatory RNA
Map3k15	0	2.67307	0.0972323	0.528174	Promoter (1-2kb)	159989778	159990177	20	159988433	160123351	134919	1	270672	ENSMUST00000033665.8	1345	ENSMUSG00000031303	mitogen-activated protein kinase kinase kinase 15
Thsd4	2.69846	1.07864	0.0972532	0.528174	Intron (ENSMUST00000171654.7/207596, intron 5 of 16)	60262495	60262894	9	59969719	60141220	171502	2	207596	ENSMUST00000034829.5	-121275	ENSMUSG00000032289	thrombospondin, type I, domain containing 4
Cypt2	1.15428	2.20745	0.0973455	0.528174	Distal Intergenic	105469198	105469597	20	105499772	105500639	868	1	245566	ENSMUST00000041758.4	-30175	ENSMUSG00000090132	cysteine-rich perinuclear theca 2
Scml2	1.15428	2.20745	0.0973455	0.528174	Distal Intergenic	161043656	161044055	20	161082525	161202033	119509	1	107815	ENSMUST00000238603.1	-38470	ENSMUSG00000000037	Scm polycomb group protein like 2
Blk	1.94558	1.60732	0.0974817	0.528633	Distal Intergenic	63364234	63364633	14	63374224	63376418	2195	2	12143	ENSMUST00000224965.1	11785	ENSMUSG00000014453	B lymphoid kinase
Mnx1	8.32708	0.587453	0.0975768	0.528868	Promoter (1-2kb)	29476478	29476877	5	29473034	29478470	5437	2	15285	ENSMUST00000165512.3	1593	ENSMUSG00000001566	motor neuron and pancreas homeobox 1
Grhl3	4.00332	0.570132	0.0976334	0.528895	Promoter (1-2kb)	135571828	135572227	4	135541888	135573630	31743	2	230824	ENSMUST00000105855.1	1403	ENSMUSG00000037188	grainyhead like transcription factor 3
Cntfr	3.51868	0.962778	0.0977602	0.5291	Promoter (<=1kb)	41696425	41696824	4	41657498	41697040	39543	2	12804	ENSMUST00000102962.9	216	ENSMUSG00000028444	ciliary neurotrophic factor receptor
Adam33	7.53061	-0.30984	0.0977747	0.5291	Promoter (<=1kb)	131054891	131055290	2	131053522	131054529	1008	2	110751	ENSMUST00000132071.1	-362	ENSMUSG00000027318	a disintegrin and metallopeptidase domain 33
Mir5046	7.80388	-0.312879	0.0978743	0.529226	Promoter (<=1kb)	6830390	6830789	19	6829886	6829944	59	2	100628576	ENSMUST00000199140.1	-446	ENSMUSG00000104884	microRNA 5046
Nfic	6.10234	0.378429	0.097914	0.529226	Promoter (<=1kb)	81427076	81427475	10	81396186	81427187	31002	2	18029	ENSMUST00000105321.9	0	ENSMUSG00000055053	nuclear factor I/C
Scml2	1.41796	2.1448	0.0979532	0.529226	Promoter (<=1kb)	161245224	161245623	20	161246257	161258196	11940	1	107815	ENSMUST00000238361.1	-634	ENSMUSG00000000037	Scm polycomb group protein like 2
Scml2	2.40692	1.77214	0.0981268	0.529593	Intron (ENSMUST00000101113.8/107815, intron 10 of 22)	161202694	161203093	20	161234573	161239864	5292	1	107815	ENSMUST00000124775.1	-31480	ENSMUSG00000000037	Scm polycomb group protein like 2
Gm14827	3.64545	1.51549	0.0982301	0.529593	Intron (ENSMUST00000113898.7/68316, intron 7 of 8)	94411049	94411448	20	94442732	94447727	4996	1	100503393	ENSMUST00000146644.1	-31284	ENSMUSG00000084904	predicted gene 14827
Adgrg2	0.889025	2.38155	0.0982657	0.529593	Intron (ENSMUST00000112408.8/237175, intron 2 of 27)	160437652	160438051	20	160427292	160496738	69447	1	237175	ENSMUST00000112398.2	10360	ENSMUSG00000031298	adhesion G protein-coupled receptor G2
Ppef1	0.889025	2.38155	0.0982657	0.529593	Promoter (3-4kb)	160716348	160716747	20	160693571	160719936	26366	2	237178	ENSMUST00000136888.1	3189	ENSMUSG00000062168	protein phosphatase with EF hand calcium-binding domain 1
Foxp4	6.77886	-0.341364	0.0983795	0.529593	Distal Intergenic	47974621	47975020	17	47867133	47924645	57513	2	74123	ENSMUST00000113265.7	-49976	ENSMUSG00000023991	forkhead box P4
Efna1	1.41807	-2.41401	0.0985158	0.529593	Promoter (4-5kb)	89285576	89285975	3	89271736	89281142	9407	2	13636	ENSMUST00000118587.7	-4434	ENSMUSG00000027954	ephrin A1
4930572O13Rik	1.94495	-2.0749	0.0985182	0.529593	Intron (ENSMUST00000225188.1/ENSMUST00000225188.1, intron 3 of 3)	25272925	25273324	14	25139795	25143241	3447	2	75862	ENSMUST00000225429.1	-129684	ENSMUSG00000114916	RIKEN cDNA 4930572O13 gene
Dusp2	4.64793	-0.595306	0.0985249	0.529593	Promoter (<=1kb)	127336464	127336863	2	127336610	127337504	895	1	13537	ENSMUST00000146479.1	0	ENSMUSG00000027368	dual specificity phosphatase 2
1700121L16Rik	3.20289	1.39516	0.0985338	0.529593	Promoter (1-2kb)	104814497	104814896	20	104816776	104842455	25680	1	76643	ENSMUST00000189166.1	-1880	ENSMUSG00000100364	RIKEN cDNA 1700121L16 gene
Adgrg2	2.85139	1.68665	0.0986354	0.529593	Intron (ENSMUST00000112408.8/237175, intron 1 of 27)	160413484	160413883	20	160427292	160496738	69447	1	237175	ENSMUST00000112398.2	-13409	ENSMUSG00000031298	adhesion G protein-coupled receptor G2
Rhou	3.19515	0.841779	0.0986398	0.529593	Intron (ENSMUST00000127664.1/108148, intron 1 of 15)	123643667	123644066	8	123653929	123655985	2057	1	69581	ENSMUST00000136615.1	-9863	ENSMUSG00000039960	ras homolog family member U
Dnajc12	0.4334	2.48333	0.0986732	0.529593	Promoter (<=1kb)	63382105	63382504	10	63382443	63408280	25838	1	30045	ENSMUST00000129625.7	0	ENSMUSG00000036764	DnaJ heat shock protein family (Hsp40) member C12
Btbd3	2.98072	0.887981	0.0987348	0.529593	Distal Intergenic	138185142	138185541	2	138256565	138287422	30858	1	228662	ENSMUST00000091556.11	-71024	ENSMUSG00000062098	BTB (POZ) domain containing 3
Itpka	3.77538	-0.784677	0.0987456	0.529593	Exon (ENSMUST00000028758.7/228550, exon 2 of 7)	119749026	119749425	2	119742337	119751263	8927	1	228550	ENSMUST00000028758.7	6689	ENSMUSG00000027296	inositol 1,4,5-trisphosphate 3-kinase A
Klhl30	6.75209	-0.347458	0.0988646	0.529953	Exon (ENSMUST00000088904.9/227357, exon 9 of 9)	91344593	91344992	1	91351016	91362416	11401	1	70788	ENSMUST00000027533.8	-6024	ENSMUSG00000026308	kelch-like 30
Scml2	1.40353	2.12391	0.099071	0.530782	Distal Intergenic	161386788	161387187	20	161246257	161258196	11940	1	107815	ENSMUST00000238361.1	140531	ENSMUSG00000000037	Scm polycomb group protein like 2
Phka2	2.22221	1.89205	0.0991332	0.530832	Promoter (2-3kb)	160528491	160528890	20	160530894	160591141	60248	1	110094	ENSMUST00000139496.7	-2004	ENSMUSG00000031295	phosphorylase kinase alpha 2
Foxn4	7.58869	-0.285048	0.0991842	0.530832	Promoter (<=1kb)	114274288	114274687	5	114254164	114273807	19644	2	116810	ENSMUST00000044790.11	-481	ENSMUSG00000042002	forkhead box N4
Ankrd34a	4.62585	0.468609	0.0992627	0.530975	Promoter (<=1kb)	96596136	96596535	3	96596636	96599775	3140	1	545554	ENSMUST00000058943.7	-101	ENSMUSG00000049097	ankyrin repeat domain 34A
Frmpd4	2.92686	1.67706	0.0994495	0.531237	Exon (ENSMUST00000122104.1/ENSMUST00000122104.1, exon 1 of 1)	168074566	168074965	20	167473973	168122826	648854	2	333605	ENSMUST00000112146.8	47861	ENSMUSG00000049176	FERM and PDZ domain containing 4
Tnfrsf23	3.97595	-0.707218	0.0996211	0.531237	Promoter (<=1kb)	143685576	143685975	7	143665809	143685872	20064	2	79201	ENSMUST00000035742.13	0	ENSMUSG00000037613	tumor necrosis factor receptor superfamily, member 23
Irf2bp2	5.2338	-0.493545	0.0996776	0.531237	Distal Intergenic	126701639	126702038	8	126588296	126593986	5691	2	270110	ENSMUST00000054960.7	-107653	ENSMUSG00000051495	interferon regulatory factor 2 binding protein 2
St6gal1	1.51889	-2.55258	0.0997007	0.531237	Intron (ENSMUST00000023601.13/20440, intron 1 of 7)	23251909	23252308	16	23269629	23321179	51551	1	20440	ENSMUST00000128050.7	-17321	ENSMUSG00000022885	beta galactoside alpha 2,6 sialyltransferase 1
Spin4	2.76518	1.68659	0.0997455	0.531237	Distal Intergenic	94990568	94990967	20	95022510	95026682	4173	2	270624	ENSMUST00000096367.4	35715	ENSMUSG00000071722	spindlin family, member 4
Reps2	1.44383	1.87789	0.0997599	0.531237	Intron (ENSMUST00000101102.1/194590, intron 1 of 17)	162621670	162622069	20	162411954	162643601	231648	2	194590	ENSMUST00000101102.1	21532	ENSMUSG00000040855	RALBP1 associated Eps domain containing protein 2
Slc1a5	3.46682	-0.908636	0.0997705	0.531237	Promoter (<=1kb)	16781870	16782269	7	16782398	16787179	4782	1	20514	ENSMUST00000206444.1	-129	ENSMUSG00000001918	solute carrier family 1 (neutral amino acid transporter), member 5
Bhlha9	7.88212	-0.299526	0.0998089	0.531237	Promoter (<=1kb)	76672666	76673065	11	76672470	76673676	1207	1	320522	ENSMUST00000056184.1	196	ENSMUSG00000044243	basic helix-loop-helix family, member a9
Cbwd1	4.57005	0.496357	0.0998109	0.531237	Promoter (<=1kb)	24961599	24961998	19	24919916	24961601	41686	2	226043	ENSMUST00000025815.9	0	ENSMUSG00000024878	COBW domain containing 1
Gm38403	4.87376	0.55521	0.0998309	0.531237	Distal Intergenic	118955507	118955906	10	118920381	118927143	6763	2	216377	ENSMUST00000219032.1	-28364	ENSMUSG00000112854	predicted gene, 38403
Jak1	6.66559	-0.38792	0.0998948	0.531301	Intron (ENSMUST00000131864.1/ENSMUST00000131864.1, intron 2 of 2)	101292873	101293272	4	101152367	101265282	112916	2	16451	ENSMUST00000102781.9	-27591	ENSMUSG00000028530	Janus kinase 1
Slc38a5	2.89734	0.952309	0.100023	0.531708	Promoter (<=1kb)	8271643	8272042	20	8271642	8280174	8533	1	209837	ENSMUST00000115590.1	1	ENSMUSG00000031170	solute carrier family 38, member 5
Col4a6	1.96199	1.97713	0.100087	0.531773	Intron (ENSMUST00000101205.2/94216, intron 3 of 44)	141262927	141263326	20	141186191	141207602	21412	2	94216	ENSMUST00000137051.7	-55325	ENSMUSG00000031273	collagen, type IV, alpha 6
Apaf1	4.8737	-0.663313	0.100224	0.532132	Exon (ENSMUST00000183156.7/77531, exon 26 of 26)	90969634	90970033	10	90996740	90999719	2980	2	11783	ENSMUST00000161095.1	29686	ENSMUSG00000019979	apoptotic peptidase activating factor 1
Crip1	4.72993	-0.507372	0.10028	0.532132	Promoter (<=1kb)	113152115	113152514	12	113152081	113153879	1799	1	12925	ENSMUST00000198909.1	34	ENSMUSG00000006360	cysteine-rich protein 1 (intestinal)
Lrrc38	6.95785	-0.313029	0.100355	0.532132	Promoter (<=1kb)	143350147	143350546	4	143349757	143371032	21276	1	242735	ENSMUST00000052458.2	390	ENSMUSG00000028584	leucine rich repeat containing 38
Slc9a3	6.43215	-0.447318	0.100363	0.532132	Promoter (<=1kb)	74121174	74121573	13	74121457	74130891	9435	1	105243	ENSMUST00000221410.1	0	ENSMUSG00000036123	solute carrier family 9 (sodium/hydrogen exchanger), member 3
Irx1	2.54729	-1.59027	0.100457	0.532197	Distal Intergenic	72263379	72263778	13	71957921	71963723	5803	2	16371	ENSMUST00000077337.8	-299656	ENSMUSG00000060969	Iroquois homeobox 1
Hey1	4.38522	0.521472	0.100479	0.532197	Distal Intergenic	8766546	8766945	3	8663359	8667256	3898	2	15213	ENSMUST00000042412.4	-99290	ENSMUSG00000040289	hairy/enhancer-of-split related with YRPW motif 1
Tenm3	6.14194	-0.47313	0.100614	0.532636	Promoter (<=1kb)	48844893	48845292	8	48646261	48843951	197691	2	23965	ENSMUST00000211812.1	-942	ENSMUSG00000031561	teneurin transmembrane protein 3
Usp51	1.78803	1.76546	0.100811	0.533403	Distal Intergenic	152975339	152975738	20	153006469	153009416	2948	1	635253	ENSMUST00000095755.3	-30731	ENSMUSG00000067215	ubiquitin specific protease 51
Col4a5	1.54604	2.03401	0.100956	0.533704	Promoter (4-5kb)	141480361	141480760	20	141475410	141689180	213771	1	12830	ENSMUST00000112930.7	4951	ENSMUSG00000031274	collagen, type IV, alpha 5
Cypt2	1.40935	2.13258	0.100972	0.533704	Promoter (<=1kb)	105500048	105500447	20	105499772	105500639	868	1	245566	ENSMUST00000041758.4	276	ENSMUSG00000090132	cysteine-rich perinuclear theca 2
Esrp1	8.40273	0.366743	0.101033	0.533749	Promoter (1-2kb)	11387878	11388277	4	11332038	11386783	54746	2	207920	ENSMUST00000108311.8	-1095	ENSMUSG00000040728	epithelial splicing regulatory protein 1
Mir676	2.30147	1.80164	0.101145	0.534017	Intron (ENSMUST00000134582.1/13607, intron 1 of 1)	100243553	100243952	20	100381097	100381185	89	1	751534	ENSMUST00000102443.1	-137145	ENSMUSG00000076398	microRNA 676
Ptpro	2.7748	-1.76941	0.101188	0.534017	Distal Intergenic	137467225	137467624	6	137454028	137462622	8595	1	19277	ENSMUST00000203127.1	13197	ENSMUSG00000030223	protein tyrosine phosphatase, receptor type, O
Amelx	1.37879	2.08677	0.101267	0.534043	Promoter (3-4kb)	169190980	169191379	20	169180022	169187200	7179	2	11704	ENSMUST00000154923.1	-3780	ENSMUSG00000031354	amelogenin, X-linked
Grip1	2.0913	-2.06853	0.101369	0.534043	Promoter (<=1kb)	119692744	119693143	10	119692054	119931531	239478	1	74053	ENSMUST00000238747.1	690	ENSMUSG00000034813	glutamate receptor interacting protein 1
Plekha6	3.23277	-0.96621	0.101471	0.534043	Intron (ENSMUST00000212252.1/240753, intron 3 of 9)	133204438	133204837	1	133181321	133301219	119899	1	240753	ENSMUST00000187285.6	23117	ENSMUSG00000041757	pleckstrin homology domain containing, family A member 6
Spats2l	1.81734	1.66079	0.101522	0.534043	Promoter (<=1kb)	57846502	57846901	1	57845571	57946965	101395	1	67198	ENSMUST00000169772.2	931	ENSMUSG00000038305	spermatogenesis associated, serine-rich 2-like
Nxt2	0.99483	2.52613	0.101545	0.534043	Distal Intergenic	142250503	142250902	20	142228703	142239692	10990	1	237082	ENSMUST00000112913.1	21800	ENSMUSG00000042271	nuclear transport factor 2-like export factor 2
Frmpd4	2.00525	1.84895	0.101553	0.534043	Intron (ENSMUST00000112147.8/333605, intron 3 of 19)	168378351	168378750	20	167473973	168448042	974070	2	333605	ENSMUST00000238709.1	69292	ENSMUSG00000049176	FERM and PDZ domain containing 4
Crnde	2.60367	-1.61015	0.101558	0.534043	Distal Intergenic	92216330	92216729	8	92326033	92346870	20838	2	71296	ENSMUST00000178064.8	130141	ENSMUSG00000031736	colorectal neoplasia differentially expressed (non-protein coding)
Gpr20	1.92665	1.48735	0.101651	0.534113	Distal Intergenic	73679926	73680325	15	73694604	73707505	12902	2	239530	ENSMUST00000064166.4	27180	ENSMUSG00000045281	G protein-coupled receptor 20
Tmem159	3.17211	-0.997831	0.101676	0.534113	Promoter (<=1kb)	120102871	120103270	7	120102895	120104669	1775	1	233806	ENSMUST00000208968.1	0	ENSMUSG00000030917	transmembrane protein 159
Klf14	5.36386	-0.550716	0.101768	0.534197	Promoter (<=1kb)	30958606	30959005	6	30956023	30959078	3056	2	619665	ENSMUST00000101589.4	73	ENSMUSG00000073209	Kruppel-like factor 14
Mir676	1.37297	2.078	0.101924	0.534197	Intron (ENSMUST00000134582.1/13607, intron 1 of 1)	100225464	100225863	20	100381097	100381185	89	1	751534	ENSMUST00000102443.1	-155234	ENSMUSG00000076398	microRNA 676
Asic4	7.32297	0.293402	0.101977	0.534197	Promoter (<=1kb)	75450870	75451269	1	75450699	75474343	23645	1	241118	ENSMUST00000037708.9	171	ENSMUSG00000033007	acid-sensing (proton-gated) ion channel family member 4
Morrbid	2.1867	-1.67895	0.102073	0.534197	Intron (ENSMUST00000225087.1/100043424, intron 1 of 6)	128395771	128396170	2	128372107	128428893	56787	2	100043424	ENSMUST00000125354.1	32723	ENSMUSG00000074813	myeloid RNA regulator of BCL2L11 induced cell death
[truncated: 8,281 more rows]
