# Supplementary material for: Loss of Ezh2 in the medial ganglionic eminence alters interneuron fate, cell morphology and gene expression profiles
Source: bioRxiv preprint, doi:10.1101/2023.09.06.556544, version 1 (2023-09-06)
Supplement: Supplementary Table 4_E15CUTTAG [file 556544_file05.xlsx]

## Sheet: e15_annotated
SYMBOL	Conc	Fold	p.value	FDR	annotation	start	end	geneChr	geneStart	geneEnd	geneLength	geneStrand	geneId	transcriptId	distanceToTSS	ENSEMBL	GENENAME
Slc16a2	6.46944	3.46532	1.14938e-20	7.06525e-17	Downstream (2-3kb)	103694789	103695188	20	103699851	103706454	6604	2	20502	ENSMUST00000171837.1	11266	ENSMUSG00000033965	solute carrier family 16 (monocarboxylic acid transporters), member 2
Tsix	4.8122	3.95815	1.27752e-14	3.92647e-11	Promoter (<=1kb)	103447607	103448006	20	103447722	103482406	34685	1	22097	ENSMUST00000211291.1	0	ENSMUSG00000085715	X (inactive)-specific transcript, opposite strand
Lingo1	4.91264	-1.36705	5.50257e-08	0.000109714	Promoter (1-2kb)	56767232	56767631	9	56685190	56769123	83934	2	235402	ENSMUST00000210995.1	1492	ENSMUSG00000049556	leucine rich repeat and Ig domain containing 1
Mid1	4.14246	3.01688	7.13937e-08	0.000109714	Promoter (<=1kb)	169879351	169879750	20	169879622	169990798	111177	1	17318	ENSMUST00000112105.7	0	ENSMUSG00000035299	midline 1
4930563J15Rik	5.53607	1.32383	1.40213e-07	0.000172378	Distal Intergenic	67563206	67563605	10	67569018	67570038	1021	2	105245193	ENSMUST00000219752.1	6433	NA	RIKEN cDNA 4930563J15 gene
Mir5120	4.2575	2.19372	5.10318e-07	0.000522821	Distal Intergenic	44520541	44520940	4	44607491	44607568	78	2	100628590	ENSMUST00000175020.1	86628	ENSMUSG00000092761	microRNA 5120
Sfta3-ps	4.77444	1.61729	1.72643e-06	0.00151606	Distal Intergenic	56461738	56462137	12	56488321	56493324	5004	2	104798	ENSMUST00000219680.1	31187	ENSMUSG00000112343	surfactant associated 3, pseudogene
Wnt5a	5.2349	1.17929	8.08855e-06	0.00604709	Promoter (<=1kb)	28509455	28509854	14	28510618	28511925	1308	1	22418	ENSMUST00000151929.1	-764	ENSMUSG00000021994	wingless-type MMTV integration site family, member 5A
Kantr	2.498	6.09889	8.85371e-06	0.00604709	Intron (ENSMUST00000195280.2/72997, intron 2 of 2)	152308991	152309390	20	152298729	152327463	28735	2	72997	ENSMUST00000181635.7	18073	ENSMUSG00000087403	Kdm5c adjacent non-coding transcript
Foxp4	6.93385	-0.933903	1.13667e-05	0.0069871	Promoter (2-3kb)	47921563	47921962	17	47867764	47924400	56637	2	74123	ENSMUST00000113263.7	2438	ENSMUSG00000023991	forkhead box P4
3010001F23Rik	3.27932	3.10356	1.63209e-05	0.00912044	Intron (ENSMUST00000130625.7/75693, intron 2 of 3)	152387459	152387858	20	152402596	152416698	14103	1	75693	ENSMUST00000157022.1	-14738	ENSMUSG00000084885	RIKEN cDNA 3010001F23 gene
Eif2s3x	3.26277	3.07869	1.94795e-05	0.00986828	Distal Intergenic	94173645	94174044	20	94199641	94212651	13011	2	26905	ENSMUST00000113922.1	38607	ENSMUSG00000035150	eukaryotic translation initiation factor 2, subunit 3, structural gene X-linked
Shank2	5.18579	1.12749	2.087e-05	0.00986828	Distal Intergenic	143977978	143978377	7	144001928	144424494	422567	1	210274	ENSMUST00000105902.7	-23551	ENSMUSG00000037541	SH3 and multiple ankyrin repeat domains 2
Dlx6os1	6.87216	0.932641	3.01855e-05	0.0132536	Promoter (3-4kb)	6874745	6875144	6	6820543	6871592	51050	2	320038	ENSMUST00000159568.5	-3153	ENSMUSG00000090063	distal-less homeobox 6, opposite strand 1
Has3	4.38588	-1.23547	4.41967e-05	0.0181118	Promoter (<=1kb)	106870925	106871324	8	106870891	106884566	13676	1	15118	ENSMUST00000175987.1	34	ENSMUSG00000031910	hyaluronan synthase 3
3010001F23Rik	2.89708	3.26014	8.84004e-05	0.0339623	Intron (ENSMUST00000130625.7/75693, intron 2 of 3)	152375049	152375448	20	152369842	152386200	16359	1	75693	ENSMUST00000137460.1	5207	ENSMUSG00000084885	RIKEN cDNA 3010001F23 gene
Cox10	5.45189	0.949269	9.45175e-05	0.0341764	Intron (ENSMUST00000049091.8/70383, intron 3 of 6)	64047372	64047771	11	63962627	64079466	116840	2	70383	ENSMUST00000049091.8	31695	ENSMUSG00000042148	heme A:farnesyltransferase cytochrome c oxidase assembly factor 10
Gabbr2	4.00161	1.7655	0.00011173	0.0381557	Intron (ENSMUST00000107749.3/242425, intron 2 of 18)	46869814	46870213	4	46798561	46859902	61342	2	242425	ENSMUST00000206773.1	-9912	ENSMUSG00000039809	gamma-aminobutyric acid (GABA) B receptor, 2
Mt1	4.86148	1.1364	0.000120428	0.0389616	Promoter (<=1kb)	94179182	94179581	8	94179211	94180327	1117	1	17748	ENSMUST00000212291.1	0	ENSMUSG00000031765	metallothionein 1
Dach1	2.7803	3.12044	0.000137257	0.0392952	Promoter (1-2kb)	98167276	98167675	14	97786853	98169543	382691	2	13134	ENSMUST00000069334.7	1868	ENSMUSG00000055639	dachshund family transcription factor 1
Cfap77	5.21471	-0.873605	0.000138453	0.0392952	Intron (ENSMUST00000189027.6/329375, intron 1 of 6)	29010108	29010507	2	28927834	29039360	111527	2	329375	ENSMUST00000190049.1	28853	ENSMUSG00000079502	cilia and flagella associated protein 77
Rbfox1	3.54339	2.12429	0.000140637	0.0392952	Intron (ENSMUST00000230658.1/268859, intron 4 of 11)	7039724	7040123	16	7069846	7409813	339968	1	268859	ENSMUST00000229741.1	-29723	ENSMUSG00000008658	RNA binding protein, fox-1 homolog (C. elegans) 1
Meis2	4.38304	-1.15203	0.000151814	0.040574	Distal Intergenic	115855066	115855465	2	115864227	115868867	4641	2	17536	ENSMUST00000189640.6	13402	ENSMUSG00000027210	Meis homeobox 2
Smad2	5.58791	-0.824807	0.000189176	0.0484527	Distal Intergenic	76542765	76543164	18	76262492	76302642	40151	1	17126	ENSMUST00000113930.2	280273	ENSMUSG00000024563	SMAD family member 2
Klhl15	3.45573	2.24863	0.000222173	0.054628	Promoter (<=1kb)	94234945	94235344	20	94234987	94255968	20982	1	236904	ENSMUST00000096369.9	0	ENSMUSG00000043929	kelch-like 15
Socs2	4.61208	-1.01058	0.000238223	0.0563215	Promoter (<=1kb)	95414346	95414745	10	95412420	95414827	2408	2	216233	ENSMUST00000134918.1	82	ENSMUSG00000020027	suppressor of cytokine signaling 2
Ak8	3.86207	-1.3873	0.000256916	0.0572726	Intron (ENSMUST00000074156.6/68870, intron 11 of 12)	28776762	28777161	2	28742250	28760136	17887	1	68870	ENSMUST00000137588.1	34512	ENSMUSG00000026807	adenylate kinase 8
Slc16a2	2.43393	3.64694	0.000265325	0.0572726	Intron (ENSMUST00000042664.9/20502, intron 1 of 5)	103770589	103770988	20	103706384	103734189	27806	2	20502	ENSMUST00000148684.2	-36400	ENSMUSG00000033965	solute carrier family 16 (monocarboxylic acid transporters), member 2
Fgf15	5.03128	-0.872082	0.000270198	0.0572726	Promoter (<=1kb)	144896798	144897197	7	144896564	144899881	3318	1	14170	ENSMUST00000207229.1	234	ENSMUSG00000031073	fibroblast growth factor 15
Gm11266	5.44591	0.857439	0.000379664	0.075314	Intron (ENSMUST00000139835.1/102635783, intron 1 of 1)	82537146	82537545	4	82508016	82547292	39277	1	102635783	ENSMUST00000139835.1	29130	ENSMUSG00000087413	predicted gene 11266
Tll2	4.29486	1.35452	0.000397019	0.075314	Promoter (<=1kb)	41206545	41206944	19	41082753	41206835	124083	2	24087	ENSMUST00000025986.14	0	ENSMUSG00000025013	tolloid-like 2
Ntrk2	4.46163	1.26311	0.000398386	0.075314	Promoter (<=1kb)	58808363	58808762	13	58808691	58888479	79789	1	18212	ENSMUST00000225583.1	0	ENSMUSG00000055254	neurotrophic tyrosine kinase, receptor, type 2
Pmp22	4.92065	1.00171	0.000404321	0.075314	Promoter (<=1kb)	63131605	63132004	11	63131512	63159547	28036	1	18858	ENSMUST00000018361.9	93	ENSMUSG00000018217	peripheral myelin protein 22
Lhx6	7.91905	0.72023	0.000424788	0.0767992	Promoter (<=1kb)	36102298	36102697	2	36094225	36103592	9368	2	16874	ENSMUST00000187180.6	895	ENSMUSG00000026890	LIM homeobox protein 6
Zbtb46	3.36975	-1.6247	0.00044147	0.0775347	Promoter (<=1kb)	181460016	181460415	2	181421554	181459426	37873	2	72147	ENSMUST00000146446.1	-590	ENSMUSG00000027583	zinc finger and BTB domain containing 46
Ntm	3.83357	-1.34012	0.000497899	0.0850162	Promoter (<=1kb)	29411408	29411807	9	29009102	29411736	402635	2	235106	ENSMUST00000115236.1	0	ENSMUSG00000059974	neurotrimin
4933406D12Rik	2.28293	3.51376	0.000529205	0.0879195	Distal Intergenic	146631903	146632302	2	146542931	146546108	3178	1	74065	ENSMUST00000147212.1	88972	ENSMUSG00000085796	RIKEN cDNA 4933406D12 gene
Kdm5c	3.02841	2.42069	0.000555877	0.0899204	Exon (ENSMUST00000168786.7/245666, exon 7 of 15)	152211739	152212138	20	152233020	152273768	40749	1	20591	ENSMUST00000112584.7	-20882	ENSMUSG00000025332	lysine (K)-specific demethylase 5C
Lipg	4.29122	1.32366	0.000579397	0.0907487	Promoter (<=1kb)	74961701	74962100	18	74939322	74961263	21942	2	16891	ENSMUST00000066532.4	-438	ENSMUSG00000053846	lipase, endothelial
Zbtb43	5.27511	-0.77853	0.000590524	0.0907487	Distal Intergenic	33544572	33544971	2	33454888	33468559	13672	2	71834	ENSMUST00000126442.1	-76013	ENSMUSG00000026788	zinc finger and BTB domain containing 43
Myt1l	4.91161	0.973634	0.000609984	0.0914529	Promoter (<=1kb)	29533265	29533664	12	29533385	29566998	33614	1	17933	ENSMUST00000219899.1	0	ENSMUSG00000061911	myelin transcription factor 1-like
Mir9-3hg	2.60749	-1.95795	0.000631091	0.0919975	Promoter (1-2kb)	79501838	79502237	7	79500121	79531393	31273	1	101694	ENSMUST00000182937.7	1717	ENSMUSG00000097023	Mir9-3 host gene
B3gnt6	5.2061	0.871178	0.000643549	0.0919975	Exon (ENSMUST00000098278.3/272411, exon 2 of 2)	98193736	98194135	7	98192417	98199481	7065	2	272411	ENSMUST00000098278.3	5346	ENSMUSG00000074004	UDP-GlcNAc:betaGal beta-1,3-N-acetylglucosaminyltransferase 6 (core 3 synthase)
Nrtn	5.43117	0.825009	0.000662475	0.0921786	Promoter (<=1kb)	56756537	56756936	17	56751325	56757530	6206	2	18188	ENSMUST00000044752.5	594	ENSMUSG00000039481	neurturin
Neurog3	6.14538	0.758852	0.000674807	0.0921786	Promoter (<=1kb)	62133288	62133687	10	62133098	62133898	801	1	11925	ENSMUST00000218121.1	190	ENSMUSG00000044312	neurogenin 3
Ksr1	1.72548	5.34066	0.0006907	0.0922986	Intron (ENSMUST00000018478.10/16706, intron 1 of 18)	79131573	79131972	11	79013440	79146407	132968	2	16706	ENSMUST00000018478.10	14435	ENSMUSG00000018334	kinase suppressor of ras 1
Smoc2	5.39302	0.827788	0.00072164	0.0926352	Promoter (<=1kb)	14279351	14279750	17	14279506	14404790	125285	1	64074	ENSMUST00000024660.8	0	ENSMUSG00000023886	SPARC related modular calcium binding 2
Irx4	4.00615	1.49101	0.000726444	0.0926352	Distal Intergenic	73038445	73038844	13	73260479	73269608	9130	1	50916	ENSMUST00000176684.7	-221635	ENSMUSG00000021604	Iroquois homeobox 4
Tfap2c	6.09732	0.766066	0.000738429	0.0926352	Distal Intergenic	172731862	172732261	2	172552116	172553518	1403	1	21420	ENSMUST00000142633.1	179746	ENSMUSG00000028640	transcription factor AP-2, gamma
Nav2	5.13537	0.884807	0.000769624	0.0946176	Promoter (<=1kb)	48959988	48960387	7	48959097	49606821	647725	1	78286	ENSMUST00000183659.7	891	ENSMUSG00000052512	neuron navigator 2
Mir124-2hg	2.39343	-2.06647	0.000811111	0.0977627	Promoter (1-2kb)	17788303	17788702	3	17789921	17800073	10153	1	70441	ENSMUST00000188983.6	-1219	ENSMUSG00000100252	Mir124-2 host gene (non-protein coding)
Baiap3	3.40373	1.92646	0.00085374	0.100922	Promoter (<=1kb)	25255255	25255654	17	25251018	25256274	5257	2	545192	ENSMUST00000182978.1	620	ENSMUSG00000047507	BAI1-associated protein 3
C1ql3	5.63465	0.77151	0.000871355	0.101061	Promoter (1-2kb)	13009417	13009816	2	13003457	13011806	8350	2	227580	ENSMUST00000061545.6	1990	ENSMUSG00000049630	C1q-like 3
Zfp521	4.19723	-1.09589	0.000895768	0.101968	Promoter (1-2kb)	13970308	13970707	18	13688216	13971720	283505	2	225207	ENSMUST00000234410.1	1013	ENSMUSG00000024420	zinc finger protein 521
Ebf1	3.6155	-1.38262	0.000942352	0.103884	Intron (ENSMUST00000109268.1/13591, intron 6 of 15)	44650103	44650502	11	44621761	44643459	21699	1	13591	ENSMUST00000138452.1	28342	ENSMUSG00000057098	early B cell factor 1
Timm13	2.191	-2.19753	0.000946396	0.103884	Promoter (<=1kb)	80900783	80901182	10	80899450	80900969	1520	2	30055	ENSMUST00000020440.6	0	ENSMUSG00000020219	translocase of inner mitochondrial membrane 13
2810459M11Rik	5.47546	0.788557	0.000980435	0.105732	Promoter (<=1kb)	86046363	86046762	1	86045863	86055456	9594	1	72792	ENSMUST00000165824.2	500	ENSMUSG00000026227	RIKEN cDNA 2810459M11 gene
Mybpc2	1.24742	-3.34637	0.00111633	0.116914	Promoter (<=1kb)	44508696	44509095	7	44506208	44509078	2871	2	233199	ENSMUST00000207516.1	0	ENSMUSG00000038670	myosin binding protein C, fast-type
Dchs2	2.70201	2.47896	0.00112216	0.116914	Distal Intergenic	83100129	83100528	3	83127948	83357209	229262	1	100534287	ENSMUST00000191829.1	-27420	ENSMUSG00000102692	dachsous cadherin related 2
Fam90a1b	3.20804	1.96871	0.00115874	0.11862	Promoter (<=1kb)	94363836	94364235	20	94339903	94364570	24668	2	631145	ENSMUST00000239046.1	335	ENSMUSG00000043549	family with sequence similarity 90, member A1B
Trmt11	2.90454	2.25742	0.00118712	0.11862	Distal Intergenic	30408461	30408860	10	30559121	30590109	30989	2	73681	ENSMUST00000215041.1	181249	ENSMUSG00000019792	tRNA methyltransferase 11
Chodl	3.44628	1.79121	0.00119643	0.11862	Distal Intergenic	78831039	78831438	16	78930948	78947155	16208	1	246048	ENSMUST00000114216.1	-99510	ENSMUSG00000022860	chondrolectin
Sulf1	4.17775	1.28902	0.00122568	0.119214	Promoter (<=1kb)	12692112	12692511	1	12692277	12861192	168916	1	240725	ENSMUST00000177608.7	0	ENSMUSG00000016918	sulfatase 1
Shank1	1.91541	-2.37144	0.00124121	0.119214	Promoter (<=1kb)	44309368	44309767	7	44310253	44360572	50320	1	243961	ENSMUST00000107938.7	-486	ENSMUSG00000038738	SH3 and multiple ankyrin repeat domains 1
Pgm5	1.59488	5.21378	0.00129176	0.122161	Intron (ENSMUST00000047666.4/226041, intron 6 of 10)	24810037	24810436	19	24684551	24763078	78528	2	226041	ENSMUST00000133692.1	-46959	ENSMUSG00000041731	phosphoglucomutase 5
Asphd2	1.59669	5.21684	0.00147276	0.135194	Promoter (<=1kb)	112395115	112395514	5	112391688	112394866	3179	2	72898	ENSMUST00000196256.1	-249	ENSMUSG00000029348	aspartate beta-hydroxylase domain containing 2
Mir148a	3.55901	-1.35104	0.00147356	0.135194	Distal Intergenic	51207177	51207576	6	51269812	51269910	99	2	387166	ENSMUST00000083571.1	62334	ENSMUSG00000065505	microRNA 148a
Plxna1	0.36238	-5.0072	0.00150768	0.13629	Promoter (<=1kb)	89361853	89362252	6	89316314	89362620	46307	2	18844	ENSMUST00000163139.7	368	ENSMUSG00000030084	plexin A1
Anxa11	5.35606	0.775642	0.00162919	0.143909	Promoter (<=1kb)	25842220	25842619	14	25842183	25886804	44622	1	11744	ENSMUST00000133547.1	37	ENSMUSG00000021866	annexin A11
Col2a1	5.86773	0.724256	0.00163879	0.143909	Promoter (<=1kb)	98004137	98004536	15	97975602	98004657	29056	2	12824	ENSMUST00000088355.11	121	ENSMUSG00000022483	collagen, type II, alpha 1
Bcor	2.67389	2.45709	0.00170351	0.147369	Promoter (1-2kb)	12081916	12082315	20	12036740	12080553	43814	2	71458	ENSMUST00000124033.7	-1363	ENSMUSG00000040363	BCL6 interacting corepressor
Iqca	2.7418	-1.70561	0.00174142	0.147369	Distal Intergenic	90038540	90038939	1	90042140	90054960	12821	2	74918	ENSMUST00000212859.1	16021	ENSMUSG00000026301	IQ motif containing with AAA domain
Phactr1	5.2048	0.7896	0.00175148	0.147369	Distal Intergenic	42659764	42660163	13	42680623	43138524	457902	1	218194	ENSMUST00000128646.7	-20460	ENSMUSG00000054728	phosphatase and actin regulator 1
Sulf2	4.07983	1.29523	0.00177409	0.147369	Promoter (<=1kb)	166153624	166154023	2	166132593	166154423	21831	2	72043	ENSMUST00000133395.1	400	ENSMUSG00000006800	sulfatase 2
Unc5c	2.39417	2.70887	0.00185672	0.152177	Intron (ENSMUST00000106236.8/22253, intron 1 of 15)	141587353	141587752	3	141465671	141830538	364868	1	22253	ENSMUST00000142762.1	121682	ENSMUSG00000059921	unc-5 netrin receptor C
Nlgn1	1.4883	5.10973	0.0019745	0.159701	Promoter (<=1kb)	26332423	26332822	3	25426215	26332460	906246	2	192167	ENSMUST00000193603.5	0	ENSMUSG00000063887	neuroligin 1
Ppara	5.65684	0.710399	0.00203327	0.162318	Promoter (<=1kb)	85735136	85735535	15	85735564	85802163	66600	1	19013	ENSMUST00000109423.7	-29	ENSMUSG00000022383	peroxisome proliferator activated receptor alpha
Zfx	1.51054	5.13182	0.00208542	0.162611	Distal Intergenic	94146678	94147077	20	94098672	94123702	25031	2	22764	ENSMUST00000135661.1	-22976	ENSMUSG00000079509	zinc finger protein X-linked
Foxd1	6.25969	0.685551	0.00208985	0.162611	Distal Intergenic	98391088	98391487	13	98354242	98359305	5064	1	15229	ENSMUST00000105098.5	36846	ENSMUSG00000078302	forkhead box D1
Aldh1a2	2.36176	2.68293	0.00217957	0.167473	Intron (ENSMUST00000034723.5/19378, intron 1 of 13)	71228209	71228608	9	71215789	71296243	80455	1	19378	ENSMUST00000034723.5	12420	ENSMUSG00000013584	aldehyde dehydrogenase family 1, subfamily A2
C530044C16Rik	1.45551	5.07733	0.00222481	0.168838	Promoter (2-3kb)	50778588	50778987	6	50776324	50815033	38710	1	319981	ENSMUST00000204275.1	2264	ENSMUSG00000107667	RIKEN cDNA C530044C16 gene
Smg6	0.842276	-3.77928	0.00234649	0.173782	Promoter (1-2kb)	75158229	75158628	11	75159633	75163182	3550	1	103677	ENSMUST00000153226.1	-1005	ENSMUSG00000038290	Smg-6 homolog, nonsense mediated mRNA decay factor (C. elegans)
Vmn1r66	0.842276	-3.77928	0.00234649	0.173782	Intron (ENSMUST00000237045.1/ENSMUST00000237045.1, intron 1 of 2)	10285018	10285417	7	10273828	10275351	1524	2	171264	ENSMUST00000060374.4	-9667	ENSMUSG00000043066	vomeronasal 1 receptor 66
Ahi1	2.02398	3.2506	0.00238357	0.174427	Distal Intergenic	21090787	21091186	10	21069845	21074406	4562	1	52906	ENSMUST00000215543.1	20942	ENSMUSG00000019986	Abelson helper integration site 1
Mid1	1.46718	5.09047	0.00244692	0.176955	Intron (ENSMUST00000112107.7/17318, intron 2 of 9)	169870515	169870914	20	169879622	169990798	111177	1	17318	ENSMUST00000112105.7	-8708	ENSMUSG00000035299	midline 1
E530001F21Rik	1.44652	5.07007	0.00257692	0.182343	Distal Intergenic	105175492	105175891	20	105164632	105165361	730	2	279610	ENSMUST00000120991.2	-10131	NA	RIKEN cDNA E530001F21 gene
Cnnm2	4.43719	-0.894609	0.00258074	0.182343	Promoter (1-2kb)	46762826	46763225	19	46761605	46854052	92448	1	94219	ENSMUST00000235378.1	1221	ENSMUSG00000064105	cyclin M2
Atoh8	5.29592	-0.687574	0.00261371	0.182574	Promoter (<=1kb)	72235141	72235540	6	72223742	72235230	11489	2	71093	ENSMUST00000206553.1	0	ENSMUSG00000037621	atonal bHLH transcription factor 8
Prok2	1.69629	-2.39535	0.00274588	0.189651	Intron (ENSMUST00000204791.1/ENSMUST00000204791.1, intron 3 of 3)	99973383	99973782	6	99722105	99726392	4288	2	50501	ENSMUST00000203738.1	-246991	ENSMUSG00000030069	prokineticin 2
Gjb6	4.42703	1.0344	0.00287537	0.193525	Promoter (<=1kb)	57133371	57133770	14	57123303	57133611	10309	2	14623	ENSMUST00000039380.8	0	ENSMUSG00000040055	gap junction protein, beta 6
Atp8b1	4.92707	0.822353	0.00287683	0.193525	Promoter (<=1kb)	64660542	64660941	18	64577466	64660807	83342	2	54670	ENSMUST00000237686.1	0	ENSMUSG00000039529	ATPase, class I, type 8B, member 1
Adamtsl3	5.3416	0.720025	0.00289642	0.193525	Promoter (<=1kb)	82335803	82336202	7	82335732	82614450	278719	1	269959	ENSMUST00000173287.7	71	ENSMUSG00000070469	ADAMTS-like 3
Rapgef3	4.01078	1.27453	0.00300016	0.196676	Promoter (<=1kb)	97767337	97767736	15	97744956	97767664	22709	2	223864	ENSMUST00000128775.8	0	ENSMUSG00000022469	Rap guanine nucleotide exchange factor (GEF) 3
Pthlh	4.66995	0.92344	0.00300757	0.196676	Promoter (<=1kb)	147263618	147264017	6	147252101	147264167	12067	2	19227	ENSMUST00000052296.8	150	ENSMUSG00000048776	parathyroid hormone-like peptide
Afap1l2	4.3866	1.04517	0.00320182	0.207154	Promoter (<=1kb)	57008101	57008500	19	56912361	57008198	95838	2	226250	ENSMUST00000118800.7	0	ENSMUSG00000025083	actin filament associated protein 1-like 2
Zfp608	1.37858	5.0046	0.0032352	0.207154	Intron (ENSMUST00000236611.1/ENSMUST00000236611.1, intron 5 of 5)	54770739	54771138	18	54892481	54895562	3082	2	269023	ENSMUST00000237009.1	124424	ENSMUSG00000052713	zinc finger protein 608
Mtmr4	1.475	-2.56534	0.00336917	0.210505	Promoter (<=1kb)	87595411	87595810	11	87595652	87601077	5426	1	170749	ENSMUST00000134216.2	0	ENSMUSG00000018401	myotubularin related protein 4
Zfpm1	6.03561	0.65137	0.00340134	0.210505	Promoter (3-4kb)	122337882	122338281	8	122334631	122336068	1438	1	22761	ENSMUST00000212315.1	3251	ENSMUSG00000049577	zinc finger protein, multitype 1
E530001F21Rik	2.00575	3.23371	0.00340745	0.210505	Distal Intergenic	105219049	105219448	20	105164632	105165361	730	2	279610	ENSMUST00000120991.2	-53688	NA	RIKEN cDNA E530001F21 gene
Aldoart2	1.80028	-2.23758	0.00345587	0.210505	Distal Intergenic	55535297	55535696	12	55565239	55566896	1658	1	79459	ENSMUST00000080123.1	-29543	ENSMUSG00000063129	aldolase 1 A, retrogene 2
Celrr	1.94717	3.17233	0.00345875	0.210505	Distal Intergenic	121051801	121052200	1	121087405	121120956	33552	1	98452	ENSMUST00000181433.7	-35205	ENSMUSG00000097881	cerebellum expressed regulatory RNA
Ss18	2.73592	2.06593	0.00359362	0.215143	Distal Intergenic	14454663	14455062	18	14633542	14637406	3865	2	268996	ENSMUST00000238844.1	182344	ENSMUSG00000037013	SS18, nBAF chromatin remodeling complex subunit
Mid1	1.37382	5.00002	0.00364604	0.215143	Intron (ENSMUST00000112107.7/17318, intron 2 of 9)	169912109	169912508	20	169926951	169990798	63848	1	17318	ENSMUST00000163810.8	-14443	ENSMUSG00000035299	midline 1
Card10	5.14226	0.746853	0.00365639	0.215143	Promoter (<=1kb)	78802314	78802713	15	78776493	78802669	26177	2	105844	ENSMUST00000170584.1	0	ENSMUSG00000033170	caspase recruitment domain family, member 10
Rasd2	5.19516	0.735702	0.00367496	0.215143	Promoter (<=1kb)	75214241	75214640	8	75214502	75222371	7870	1	75141	ENSMUST00000132133.1	0	ENSMUSG00000034472	RASD family, member 2
Ctbp2	3.69431	1.40326	0.00388428	0.225252	Promoter (<=1kb)	133124411	133124810	7	133025702	133124354	98653	2	13017	ENSMUST00000171882.7	-57	ENSMUSG00000030970	C-terminal binding protein 2
Cyp1a1	4.82578	-0.735478	0.00395563	0.227245	Promoter (<=1kb)	57696508	57696907	9	57697613	57703824	6212	1	13076	ENSMUST00000034865.5	-706	ENSMUSG00000032315	cytochrome P450, family 1, subfamily a, polypeptide 1
Magee1	3.09204	1.85416	0.00401505	0.228523	Promoter (<=1kb)	105120448	105120847	20	105120378	105123927	3550	1	107528	ENSMUST00000033578.6	70	ENSMUSG00000031227	MAGE family member E1
Arpp21	2.49126	2.26067	0.00406398	0.229186	Promoter (<=1kb)	112233787	112234186	9	112179141	112233815	54675	2	74100	ENSMUST00000160478.7	0	ENSMUSG00000032503	cyclic AMP-regulated phosphoprotein, 21
Khdc3	2.87189	1.89846	0.00414614	0.231651	Promoter (<=1kb)	73103345	73103744	9	73102510	73104192	1683	1	66991	ENSMUST00000167514.1	835	ENSMUSG00000092622	KH domain containing 3, subcortical maternal complex member
Slit2	5.29584	0.710146	0.00418306	0.231651	Promoter (<=1kb)	47984947	47985346	5	47984994	48173193	188200	1	20563	ENSMUST00000173926.7	0	ENSMUSG00000031558	slit guidance ligand 2
C230014O12Rik	2.61291	-1.62741	0.00426995	0.233755	Promoter (2-3kb)	34110704	34111103	2	34018289	34107729	89441	2	329387	ENSMUST00000134921.1	-2975	ENSMUSG00000087461	RIKEN cDNA C230014O12 gene
Tmem221	6.4401	0.628557	0.0042971	0.233755	Promoter (<=1kb)	71558232	71558631	8	71554238	71558871	4634	2	434325	ENSMUST00000052072.7	240	ENSMUSG00000043664	transmembrane protein 221
Ptprg	3.59107	1.43427	0.00439744	0.235149	Intron (ENSMUST00000022264.12/19270, intron 3 of 29)	11958102	11958501	14	12091160	12122132	30973	1	19270	ENSMUST00000155727.2	-132659	ENSMUSG00000021745	protein tyrosine phosphatase, receptor type, G
Xlr	2.48382	2.25307	0.0044362	0.235149	Exon (ENSMUST00000152691.1/ENSMUST00000152691.1, exon 1 of 2)	53974990	53975389	20	53777118	53797706	20589	2	22441	ENSMUST00000067782.7	-177284	ENSMUSG00000054626	X-linked lymphocyte-regulated
Ftl1	2.06978	-1.97803	0.00445505	0.235149	Promoter (<=1kb)	45459783	45460182	7	45457944	45459884	1941	2	14325	ENSMUST00000094434.12	0	ENSMUSG00000050708	ferritin light polypeptide 1
Pter	1.26658	4.89415	0.00447575	0.235149	Promoter (3-4kb)	12973730	12974129	2	12977939	13001859	23921	1	19212	ENSMUST00000195521.1	-3810	ENSMUSG00000026730	phosphotriesterase related
Myof	4.87874	0.795812	0.00452967	0.235965	Distal Intergenic	37878462	37878861	19	37899468	37901503	2036	2	226101	ENSMUST00000225435.1	22642	ENSMUSG00000048612	myoferlin
Podn	5.40016	0.674392	0.00463759	0.239557	Promoter (<=1kb)	108031072	108031471	4	108027021	108030986	3966	2	242608	ENSMUST00000147597.7	-86	ENSMUSG00000028600	podocan
Zfx	1.28073	4.91009	0.00479032	0.245384	Intron (ENSMUST00000088102.11/22764, intron 2 of 8)	94111362	94111761	20	94074632	94122900	48269	2	22764	ENSMUST00000113926.7	11139	ENSMUSG00000079509	zinc finger protein X-linked
Pmaip1	4.83738	0.802477	0.00487823	0.247822	Promoter (1-2kb)	66460504	66460903	18	66458593	66464080	5488	1	58801	ENSMUST00000236933.1	1911	ENSMUSG00000024521	phorbol-12-myristate-13-acetate-induced protein 1
Zfhx3	0	-4.59036	0.00496966	0.247974	Distal Intergenic	107820460	107820859	8	107942644	108961630	1018987	1	11906	ENSMUST00000220518.1	-121785	ENSMUSG00000038872	zinc finger homeobox 3
Nkx2-1	7.61644	0.609557	0.00497938	0.247974	Promoter (<=1kb)	56533921	56534320	12	56531958	56535106	3149	2	21869	ENSMUST00000178477.8	786	ENSMUSG00000001496	NK2 homeobox 1
Kiz	4.28075	1.05035	0.00500224	0.247974	Promoter (3-4kb)	146949327	146949726	2	146952883	146970092	17210	1	228730	ENSMUST00000135595.1	-3157	ENSMUSG00000074749	kizuna centrosomal protein
Sorbs3	4.98814	0.75504	0.0050615	0.248904	Promoter (<=1kb)	70205974	70206373	14	70180468	70206022	25555	2	20410	ENSMUST00000227653.1	0	ENSMUSG00000022091	sorbin and SH3 domain containing 3
Rpl38	2.33316	-1.73567	0.00516601	0.252028	Distal Intergenic	114639640	114640039	11	114668524	114672331	3808	1	67671	ENSMUST00000106602.9	-28485	ENSMUSG00000057322	ribosomal protein L38
Ntn1	3.99353	-1.00604	0.00529523	0.255448	Promoter (1-2kb)	68385177	68385576	11	68209364	68386826	177463	2	18208	ENSMUST00000021284.3	1250	ENSMUSG00000020902	netrin 1
Cacng3	3.23205	-1.3085	0.00531924	0.255448	Promoter (<=1kb)	122670885	122671284	7	122671391	122768421	97031	1	54376	ENSMUST00000182563.1	-107	ENSMUSG00000066189	calcium channel, voltage-dependent, gamma subunit 3
Gm4750	1.24095	4.87092	0.0054973	0.261953	Promoter (4-5kb)	152427204	152427603	20	152432477	152434676	2200	1	207318	ENSMUST00000152262.1	-4874	ENSMUSG00000087235	actin, beta pseudogene
Iqch	4.54185	-0.78545	0.00576674	0.270225	Intron (ENSMUST00000126238.2/ENSMUST00000126238.2, intron 3 of 4)	63562941	63563340	9	63421835	63602417	180583	2	78250	ENSMUST00000171243.1	39077	ENSMUSG00000037801	IQ motif containing H
Gpnmb	2.66356	1.9862	0.00576771	0.270225	Promoter (<=1kb)	49037164	49037563	6	49036677	49070929	34253	1	93695	ENSMUST00000204260.1	487	ENSMUSG00000029816	glycoprotein (transmembrane) nmb
Ccdc186	1.18814	4.8187	0.00588485	0.270225	Distal Intergenic	56776437	56776836	19	56790531	56795155	4625	2	213993	ENSMUST00000135666.7	18319	ENSMUSG00000035173	coiled-coil domain containing 186
Kif26a	3.90507	-1.0248	0.00590253	0.270225	Promoter (1-2kb)	112144584	112144983	12	112146208	112181747	35540	1	668303	ENSMUST00000128402.2	-1225	ENSMUSG00000021294	kinesin family member 26A
9130019P16Rik	6.07435	-0.593168	0.00592456	0.270225	Promoter (<=1kb)	54327028	54327427	6	54302652	54327341	24690	2	100042056	ENSMUST00000185712.1	0	ENSMUSG00000073067	RIKEN cDNA 9130019P16 gene
Lingo1	6.07362	-0.593106	0.00593467	0.270225	Promoter (<=1kb)	56634497	56634896	9	56619088	56635628	16541	2	235402	ENSMUST00000114256.1	732	ENSMUSG00000049556	leucine rich repeat and Ig domain containing 1
Sgsm1	2.2154	-1.77099	0.00607969	0.272832	Promoter (3-4kb)	113314047	113314446	5	113243220	113310786	67567	2	52850	ENSMUST00000048112.12	-3261	ENSMUSG00000042216	small G protein signaling modulator 1
Sesn3	1.17376	4.80463	0.00608068	0.272832	Distal Intergenic	14243932	14244331	9	14275067	14325817	50751	1	75747	ENSMUST00000209187.1	-30736	ENSMUSG00000032009	sestrin 3
Ahnak	3.34709	1.50002	0.00614711	0.273648	Promoter (<=1kb)	8989459	8989858	19	8989295	9076714	87420	1	66395	ENSMUST00000092955.10	164	ENSMUSG00000069833	AHNAK nucleoprotein (desmoyokin)
Cdca7	2.81437	1.83776	0.00618791	0.273648	Intron (ENSMUST00000090824.11/65964, intron 16 of 19)	72423867	72424266	2	72476159	72486893	10735	1	66953	ENSMUST00000102691.10	-51893	ENSMUSG00000055612	cell division cycle associated 7
Ccdc183	3.69439	1.30959	0.00629529	0.276408	Promoter (<=1kb)	25616424	25616823	2	25608693	25617659	8967	2	77058	ENSMUST00000129520.1	836	ENSMUSG00000026940	coiled-coil domain containing 183
Lama5	4.62945	0.850882	0.00641911	0.279846	Promoter (<=1kb)	180225524	180225923	2	180176373	180225859	49487	2	16776	ENSMUST00000015791.5	0	ENSMUSG00000015647	laminin, alpha 5
Gm11729	1.71138	-2.1233	0.00651375	0.280892	Distal Intergenic	117394601	117395000	11	117414389	117415368	980	1	105827746	ENSMUST00000124901.1	-19389	ENSMUSG00000086588	predicted gene 11729
Tpbgl	5.16533	0.688031	0.0065345	0.280892	Promoter (<=1kb)	99626937	99627336	7	99624082	99627103	3022	2	100503386	ENSMUST00000178124.2	0	ENSMUSG00000096606	trophoblast glycoprotein-like
Mir3093	4.95869	0.741894	0.0066638	0.284461	Promoter (<=1kb)	88214277	88214676	3	88215171	88215257	87	1	100526540	ENSMUST00000175247.1	-495	ENSMUSG00000092988	microRNA 3093
Robo3	4.66322	-0.737178	0.00682776	0.28945	Distal Intergenic	37460112	37460511	9	37416045	37433246	17202	2	19649	ENSMUST00000115038.2	-26866	ENSMUSG00000032128	roundabout guidance receptor 3
Lncppara	4.22112	1.01833	0.00704289	0.294558	Intron (ENSMUST00000230234.1/ENSMUST00000230234.1, intron 1 of 1)	85660956	85661355	15	85653616	85707524	53909	1	102800312	ENSMUST00000230913.1	7340	NA	long noncoding RNA near Ppara
Gm4750	1.17379	4.80695	0.00704409	0.294558	Distal Intergenic	152440415	152440814	20	152432762	152433903	1142	1	207318	ENSMUST00000151942.1	7653	ENSMUSG00000087235	actin, beta pseudogene
Cmtm7	2.95925	1.68952	0.0071054	0.295114	Promoter (<=1kb)	114781283	114781682	9	114756839	114781832	24994	2	102545	ENSMUST00000084867.8	150	ENSMUSG00000032436	CKLF-like MARVEL transmembrane domain containing 7
Cdca7	1.12854	4.76235	0.00727307	0.295696	Distal Intergenic	72501317	72501716	2	72485107	72486202	1096	1	66953	ENSMUST00000137880.1	16210	ENSMUSG00000055612	cell division cycle associated 7
Smc1a	1.82231	3.0468	0.00727638	0.295696	Promoter (1-2kb)	152047877	152048276	20	152046628	152047935	1308	1	24061	ENSMUST00000131395.1	1249	ENSMUSG00000041133	structural maintenance of chromosomes 1A
Lingo1	7.95211	-0.52129	0.00728185	0.295696	Promoter (<=1kb)	56795955	56796354	9	56618475	56796138	177664	2	235402	ENSMUST00000210032.1	0	ENSMUSG00000049556	leucine rich repeat and Ig domain containing 1
Aanat	0.91465	-2.99894	0.00734845	0.295696	Promoter (3-4kb)	116589800	116590199	11	116586432	116597333	10902	1	11298	ENSMUST00000142978.1	3368	ENSMUSG00000020804	arylalkylamine N-acetyltransferase
5530601H04Rik	1.1475	4.78108	0.00743241	0.295696	Distal Intergenic	104979074	104979473	20	105044001	105070035	26035	2	71445	ENSMUST00000127409.7	90562	ENSMUSG00000087174	RIKEN cDNA 5530601H04 gene
Phldb1	3.76675	1.24575	0.00745014	0.295696	Promoter (<=1kb)	44733986	44734385	9	44686308	44735198	48891	2	102693	ENSMUST00000034611.14	813	ENSMUSG00000048537	pleckstrin homology like domain, family B, member 1
Cdc34	1.72509	-2.08618	0.00745614	0.295696	Promoter (<=1kb)	79681806	79682205	10	79682195	79688398	6204	1	216150	ENSMUST00000020550.12	0	ENSMUSG00000020307	cell division cycle 34
Nkd2	3.53031	1.37677	0.00761697	0.297572	Promoter (<=1kb)	73846535	73846934	13	73846912	73847611	700	2	72293	ENSMUST00000221679.1	677	ENSMUSG00000021567	naked cuticle 2
1700008P02Rik	1.69086	-2.10326	0.00766373	0.297572	Distal Intergenic	6891029	6891428	3	6615418	6620443	5026	2	69347	ENSMUST00000091364.3	-270586	ENSMUSG00000069118	RIKEN cDNA 1700008P02 gene
Vti1a	2.14014	2.45251	0.00768297	0.297572	Intron (ENSMUST00000225529.1/53611, intron 7 of 7)	55553675	55554074	19	55381014	55446979	65966	1	53611	ENSMUST00000224396.1	172661	ENSMUSG00000024983	vesicle transport through interaction with t-SNAREs 1A
Dcaf5	1.11138	4.7455	0.00769708	0.297572	Promoter (3-4kb)	80380225	80380624	12	80366592	80376692	10101	2	320808	ENSMUST00000218728.1	-3533	ENSMUSG00000049106	DDB1 and CUL4 associated factor 5
Akr7a5	2.05771	-1.81447	0.00783984	0.297757	Promoter (<=1kb)	139310625	139311024	4	139310744	139318426	7683	1	110198	ENSMUST00000073787.6	0	ENSMUSG00000028743	aldo-keto reductase family 7, member A5 (aflatoxin aldehyde reductase)
Prkg1	4.31899	0.960641	0.00784295	0.297757	Promoter (1-2kb)	31763343	31763742	19	31742114	31764973	22860	2	19091	ENSMUST00000182685.1	1231	ENSMUSG00000052920	protein kinase, cGMP-dependent, type I
Gm48957	2.85354	-1.39735	0.00784719	0.297757	Distal Intergenic	25494746	25495145	15	25415063	25433520	18458	1	432939	ENSMUST00000226401.1	79683	NA	predicted gene, 48957
Pla2g2c	2.93102	1.67626	0.00795082	0.298372	Distal Intergenic	138691388	138691787	4	138724792	138746132	21341	1	18781	ENSMUST00000105808.7	-33005	ENSMUSG00000028750	phospholipase A2, group IIC
Gm5424	4.75577	0.785542	0.00796048	0.298372	Distal Intergenic	31539657	31540056	2	31518490	31520531	2042	1	432466	ENSMUST00000130195.1	21167	ENSMUSG00000046687	argininosuccinate synthase pseudogene
Dusp6	4.55112	-0.756997	0.00803303	0.299267	Promoter (<=1kb)	99263979	99264378	10	99264277	99266044	1768	1	67603	ENSMUST00000219988.1	0	ENSMUSG00000019960	dual specificity phosphatase 6
Sesn3	3.07709	1.59651	0.00820082	0.303677	Intron (ENSMUST00000209187.1/75747, intron 1 of 8)	14302918	14303317	9	14314562	14316608	2047	1	75747	ENSMUST00000207207.1	-11245	ENSMUSG00000032009	sestrin 3
Atg4a	3.71067	1.30599	0.00843433	0.310454	Intron (ENSMUST00000112971.1/666468, intron 9 of 12)	140997250	140997649	20	140956950	140992837	35888	1	666468	ENSMUST00000153742.1	40300	ENSMUSG00000079418	autophagy related 4A, cysteine peptidase
Mdfic	1.84163	-1.97974	0.00858986	0.314297	Promoter (<=1kb)	15720271	15720670	6	15720661	15802165	81505	1	16543	ENSMUST00000101663.9	0	ENSMUSG00000041390	MyoD family inhibitor domain containing
Adgrb1	7.15104	-0.546857	0.00875742	0.314691	Promoter (1-2kb)	74518018	74518417	15	74516831	74589464	72634	1	107831	ENSMUST00000187485.6	1187	ENSMUSG00000034730	adhesion G protein-coupled receptor B1
Tspyl2	1.067	4.70184	0.00887608	0.314691	Promoter (1-2kb)	152339572	152339971	20	152340265	152341801	1537	2	52808	ENSMUST00000177748.1	1830	ENSMUSG00000041096	TSPY-like 2
Mir7230	5.90444	-0.562612	0.00888147	0.314691	Promoter (2-3kb)	113334943	113335342	5	113337590	113337645	56	2	102466821	ENSMUST00000195977.1	2303	ENSMUSG00000104840	microRNA 7230
Tmem30b	2.72675	-1.41632	0.00888993	0.314691	Distal Intergenic	73517274	73517673	12	73543402	73546392	2991	2	238257	ENSMUST00000042975.6	28719	ENSMUSG00000034435	transmembrane protein 30B
Ap2a1	3.81067	-1.01428	0.00889596	0.314691	Promoter (<=1kb)	44929503	44929902	7	44900373	44929496	29124	2	11771	ENSMUST00000166972.8	-7	ENSMUSG00000060279	adaptor-related protein complex 2, alpha 1 subunit
Sox6	5.28302	0.637877	0.00890781	0.314691	Promoter (1-2kb)	116037083	116037482	7	115471344	116038744	567401	2	20679	ENSMUST00000166877.7	1262	ENSMUSG00000051910	SRY (sex determining region Y)-box 6
Hif1a	3.62871	1.29048	0.00904325	0.317651	Intron (ENSMUST00000221153.1/18755, intron 11 of 14)	73755975	73756374	12	73901375	73947530	46156	1	15251	ENSMUST00000110461.7	-145001	ENSMUSG00000021109	hypoxia inducible factor 1, alpha subunit
Plekha6	5.25917	-0.590691	0.00922799	0.322298	Promoter (<=1kb)	133163941	133164340	1	133164210	133272280	108071	1	240753	ENSMUST00000212252.1	0	ENSMUSG00000041757	pleckstrin homology domain containing, family A member 6
Als2cl	4.74156	0.766481	0.00929083	0.32266	Promoter (<=1kb)	110880200	110880599	9	110880206	110900530	20325	1	235633	ENSMUST00000130386.7	0	ENSMUSG00000044037	ALS2 C-terminal like
Gpat3	2.55277	1.90185	0.00940745	0.324874	Distal Intergenic	101210312	101210711	5	100846417	100846850	434	1	231510	ENSMUST00000145612.1	363895	ENSMUSG00000029314	glycerol-3-phosphate acyltransferase 3
Tsc22d3	3.8681	1.14349	0.00988382	0.337164	Intron (ENSMUST00000112996.8/14605, intron 2 of 3)	140575915	140576314	20	140540262	140600659	60398	2	14605	ENSMUST00000112996.8	24345	ENSMUSG00000031431	TSC22 domain family, member 3
Gm20052	5.45146	0.607936	0.00992638	0.337164	Promoter (<=1kb)	37892739	37893138	5	37893772	37897917	4146	1	102637176	ENSMUST00000200831.1	-634	ENSMUSG00000106718	predicted gene, 20052
Gli2	6.22073	-0.551887	0.00997166	0.337164	Promoter (1-2kb)	119051486	119051885	1	118848460	119053339	204880	2	14633	ENSMUST00000159839.7	1454	ENSMUSG00000048402	GLI-Kruppel family member GLI2
Fam229a	4.17713	-0.867583	0.0100676	0.337164	Promoter (<=1kb)	129491275	129491674	4	129491240	129491956	717	1	68233	ENSMUST00000135698.1	35	ENSMUSG00000078554	family with sequence similarity 229, member A
Scrg1	2.07536	2.40349	0.0100812	0.337164	Intron (ENSMUST00000211592.1/ENSMUST00000211592.1, intron 1 of 3)	57410263	57410662	8	57455923	57477585	21663	1	20284	ENSMUST00000034023.3	-45261	ENSMUSG00000031610	scrapie responsive gene 1
Odf3l1	3.75703	-1.02524	0.0100924	0.337164	Distal Intergenic	56825308	56825707	9	56848659	56851963	3305	2	382075	ENSMUST00000055036.6	26256	ENSMUSG00000045620	outer dense fiber of sperm tails 3-like 1
En2	5.99559	0.592174	0.0101756	0.338106	Distal Intergenic	28123652	28124051	5	28165694	28172166	6473	1	13799	ENSMUST00000036177.8	-41643	ENSMUSG00000039095	engrailed 2
Micall2	6.02091	-0.556132	0.0103218	0.340549	Distal Intergenic	139683525	139683924	5	139706886	139710227	3342	2	231830	ENSMUST00000164584.2	26303	ENSMUSG00000036718	MICAL-like 2
Clspn	2.08603	2.39584	0.0103599	0.340549	Promoter (<=1kb)	126556766	126557165	4	126556935	126593903	36969	1	269582	ENSMUST00000048391.14	0	ENSMUSG00000042489	claspin
Vwc2	4.52666	-0.735131	0.0106052	0.346755	Promoter (<=1kb)	11114627	11115026	11	11114744	11268931	154188	1	319922	ENSMUST00000129670.7	0	ENSMUSG00000050830	von Willebrand factor C domain containing 2
Gm29683	2.05881	2.37529	0.0106979	0.347631	Distal Intergenic	69950654	69951053	7	70178868	70337822	158955	2	624549	ENSMUST00000208511.1	386769	ENSMUSG00000109097	predicted gene, 29683
1700120E14Rik	2.22556	-1.65125	0.0107652	0.347631	Intron (ENSMUST00000125882.7/17919, intron 1 of 4)	74518385	74518784	18	74525253	74531106	5854	2	73606	ENSMUST00000137034.1	12322	NA	RIKEN cDNA 1700120E14 gene
Agap1	3.36792	1.36214	0.0108016	0.347631	Promoter (1-2kb)	89581602	89582001	1	89580236	89895277	315042	1	347722	ENSMUST00000074945.7	1366	ENSMUSG00000055013	ArfGAP with GTPase domain, ankyrin repeat and PH domain 1
E530001F21Rik	2.08692	2.39197	0.0109746	0.350442	Distal Intergenic	105151811	105152210	20	105164632	105165361	730	2	279610	ENSMUST00000120991.2	13151	NA	RIKEN cDNA E530001F21 gene
Mepe	3.48549	1.30737	0.011003	0.350442	Intron (ENSMUST00000066207.3/94111, intron 2 of 2)	104331199	104331598	5	104325329	104338611	13283	1	94111	ENSMUST00000066207.3	5870	ENSMUSG00000053863	matrix extracellular phosphoglycoprotein with ASARM motif (bone)
Mid1	2.33673	2.08644	0.0112796	0.357379	Intron (ENSMUST00000112107.7/17318, intron 2 of 9)	169940281	169940680	20	169927475	169975259	47785	1	17318	ENSMUST00000149258.1	12806	ENSMUSG00000035299	midline 1
Plekhg6	4.90714	0.69422	0.0113371	0.357379	Promoter (<=1kb)	125380185	125380584	6	125362660	125380793	18134	2	213522	ENSMUST00000042647.6	209	ENSMUSG00000038167	pleckstrin homology domain containing, family G (with RhoGef domain) member 6
2010308F09Rik	1.70107	2.92125	0.0114684	0.359018	Intron (ENSMUST00000186931.1/72122, intron 1 of 2)	13242230	13242629	20	13234684	13247736	13053	2	72122	ENSMUST00000186931.1	5107	ENSMUSG00000100714	RIKEN cDNA 2010308F09 gene
Nav2	4.2507	0.941512	0.0116016	0.359018	Promoter (<=1kb)	49364029	49364428	7	49364721	49454642	89922	1	78286	ENSMUST00000064383.6	-293	ENSMUSG00000052512	neuron navigator 2
Boc	2.73262	-1.37247	0.0116197	0.359018	Distal Intergenic	44577327	44577726	16	44485049	44558897	73849	2	117606	ENSMUST00000114634.2	-18430	ENSMUSG00000022687	biregional cell adhesion molecule-related/down-regulated by oncogenes (Cdon) binding protein
1700001C19Rik	3.13517	1.46004	0.0116227	0.359018	Exon (ENSMUST00000150819.2/224833, exon 4 of 5)	47467524	47467923	17	47413628	47437376	23749	2	75462	ENSMUST00000160678.1	-30148	ENSMUSG00000047150	RIKEN cDNA 1700001C19 gene
5530601H04Rik	1.03345	4.67421	0.0117794	0.362041	Distal Intergenic	104994661	104995060	20	105044001	105070035	26035	2	71445	ENSMUST00000127409.7	74975	ENSMUSG00000087174	RIKEN cDNA 5530601H04 gene
Lnpk	2.92173	-1.2915	0.0118602	0.362709	Promoter (<=1kb)	74578643	74579042	2	74520291	74578948	58658	2	69605	ENSMUST00000111993.8	0	ENSMUSG00000009207	lunapark, ER junction formation factor
Ddx3x	0.960377	4.5996	0.0119485	0.363601	Distal Intergenic	13272460	13272859	20	13280970	13294052	13083	1	13205	ENSMUST00000000804.6	-8111	ENSMUSG00000000787	DEAD box helicase 3, X-linked
Gpr27	4.51864	-0.721337	0.0121856	0.368966	Promoter (<=1kb)	99693496	99693895	6	99692679	99695066	2388	1	14761	ENSMUST00000101122.2	817	ENSMUSG00000072875	G protein-coupled receptor 27
Rab11fip1	5.02951	0.659217	0.012273	0.368966	Promoter (<=1kb)	27174761	27175160	8	27143028	27174646	31619	2	75767	ENSMUST00000209377.1	-115	ENSMUSG00000031488	RAB11 family interacting protein 1 (class I)
Wnt7b	6.60259	0.55558	0.0123689	0.368966	Promoter (<=1kb)	85578391	85578790	15	85536410	85578070	41661	2	22422	ENSMUST00000229191.1	-321	ENSMUSG00000022382	wingless-type MMTV integration site family, member 7B
Fbxo41	4.93678	-0.623594	0.0123867	0.368966	Exon (ENSMUST00000159062.7/330369, exon 2 of 13)	85484045	85484444	6	85469580	85502858	33279	2	330369	ENSMUST00000161546.1	18414	ENSMUSG00000047013	F-box protein 41
Zcchc13	1.69438	2.91725	0.0125289	0.368966	Distal Intergenic	103655785	103656184	20	103630586	103631670	1085	1	75064	ENSMUST00000033692.8	25199	ENSMUSG00000031330	zinc finger, CCHC domain containing 13
Pou4f1	1.48282	-2.14123	0.0125507	0.368966	Intron (ENSMUST00000228095.1/ENSMUST00000228095.1, intron 3 of 4)	104293910	104294309	14	104463973	104465365	1393	2	18996	ENSMUST00000139505.1	171056	ENSMUSG00000048349	POU domain, class 4, transcription factor 1
Nhsl1	3.72882	1.17117	0.0126334	0.368966	Intron (ENSMUST00000207038.1/215819, intron 1 of 6)	18370229	18370628	10	18390322	18524289	133968	1	215819	ENSMUST00000159299.7	-19694	ENSMUSG00000039835	NHS-like 1
F2rl1	5.29677	0.60895	0.012659	0.368966	Promoter (<=1kb)	95524614	95525013	13	95511732	95525227	13496	2	14063	ENSMUST00000022185.9	214	ENSMUSG00000021678	coagulation factor II (thrombin) receptor-like 1
Batf3	1.671	2.87954	0.0126678	0.368966	Promoter (<=1kb)	191098818	191099217	1	191098383	191108486	10104	1	381319	ENSMUST00000192268.1	435	ENSMUSG00000026630	basic leucine zipper transcription factor, ATF-like 3
Gad1	6.71137	0.542627	0.012753	0.368966	Promoter (<=1kb)	70563295	70563694	2	70563442	70585946	22505	1	14415	ENSMUST00000123330.2	0	ENSMUSG00000070880	glutamate decarboxylase 1
B9d2	3.40838	-1.10833	0.0129653	0.368966	Promoter (<=1kb)	25680700	25681099	7	25680780	25686558	5779	1	232987	ENSMUST00000205658.1	0	ENSMUSG00000063439	B9 protein domain 2
Tmem260	4.8182	-0.640171	0.0130469	0.368966	Distal Intergenic	48422124	48422523	14	48446124	48520368	74245	1	218989	ENSMUST00000227440.1	-23601	ENSMUSG00000036339	transmembrane protein 260
Gjd3	2.99528	-1.26152	0.0130776	0.368966	Promoter (<=1kb)	98981687	98982086	11	98982180	98983016	837	2	353155	ENSMUST00000062931.1	930	ENSMUSG00000047197	gap junction protein, delta 3
3010001F23Rik	1.67801	2.90029	0.0131322	0.368966	Promoter (2-3kb)	152365580	152365979	20	152368573	152416698	48126	1	75693	ENSMUST00000130625.7	-2594	ENSMUSG00000084885	RIKEN cDNA 3010001F23 gene
Icosl	4.01375	1.02106	0.0131985	0.368966	Promoter (<=1kb)	78069447	78069846	10	78069360	78075590	6231	1	50723	ENSMUST00000217675.1	87	ENSMUSG00000000732	icos ligand
Tmprss2	4.49403	0.820408	0.0132622	0.368966	Promoter (<=1kb)	97610871	97611270	16	97564682	97611195	46514	2	50528	ENSMUST00000000395.7	0	ENSMUSG00000000385	transmembrane protease, serine 2
Il4ra	0.915972	4.5588	0.0133704	0.368966	Promoter (<=1kb)	125551221	125551620	7	125552120	125579474	27355	1	16190	ENSMUST00000033004.7	-500	ENSMUSG00000030748	interleukin 4 receptor, alpha
Lrmda	5.89519	-0.536066	0.0134006	0.368966	Intron (ENSMUST00000075639.10/76633, intron 5 of 6)	22738461	22738860	14	22596513	22599268	2756	1	76633	ENSMUST00000226003.1	141948	ENSMUSG00000063458	leucine rich melanocyte differentiation associated
Cdc14b	4.40523	0.84937	0.0134482	0.368966	Promoter (<=1kb)	64274907	64275306	13	64189268	64274988	85721	2	218294	ENSMUST00000221634.1	0	ENSMUSG00000033102	CDC14 cell division cycle 14B
Pgm5	2.85021	1.58839	0.0134506	0.368966	Promoter (<=1kb)	24861735	24862134	19	24683016	24861855	178840	2	226041	ENSMUST00000047666.4	0	ENSMUSG00000041731	phosphoglucomutase 5
Dab1	3.44469	1.27262	0.0135524	0.368966	Intron (ENSMUST00000143294.7/13131, intron 1 of 3)	103632562	103632961	4	103619665	104680382	1060718	1	13131	ENSMUST00000106827.7	12897	ENSMUSG00000028519	disabled 1
Ninj1	2.21865	-1.58001	0.0135966	0.368966	Promoter (<=1kb)	49187236	49187635	13	49187485	49196244	8760	1	18081	ENSMUST00000049022.14	0	ENSMUSG00000037966	ninjurin 1
Nid2	1.79543	-1.86447	0.0136289	0.368966	Intron (ENSMUST00000022340.4/18074, intron 2 of 20)	19759314	19759713	14	19751284	19806130	54847	1	18074	ENSMUST00000225791.1	8030	ENSMUSG00000021806	nidogen 2
Slit3	1.66621	2.8544	0.0137682	0.368966	Intron (ENSMUST00000069837.3/20564, intron 4 of 35)	35404279	35404678	11	35544685	35612636	67952	1	20564	ENSMUST00000124438.1	-140007	ENSMUSG00000056427	slit guidance ligand 3
Cadm1	3.40182	-1.10359	0.0138853	0.368966	Exon (ENSMUST00000209591.1/ENSMUST00000209591.1, exon 1 of 7)	47361863	47362262	9	47530173	47853385	323213	1	54725	ENSMUST00000114548.7	-167911	ENSMUSG00000032076	cell adhesion molecule 1
Pde3a	3.82878	1.09396	0.0140176	0.368966	Promoter (<=1kb)	141249796	141250195	6	141249966	141471596	221631	1	54611	ENSMUST00000189060.2	0	ENSMUSG00000041741	phosphodiesterase 3A, cGMP inhibited
Gimap1	2.99136	1.48778	0.0140205	0.368966	Promoter (3-4kb)	48742428	48742827	6	48739107	48741796	2690	1	16205	ENSMUST00000142703.1	3321	ENSMUSG00000090019	GTPase, IMAP family member 1
Unc5c	2.28279	2.04319	0.0140764	0.368966	Intron (ENSMUST00000106236.8/22253, intron 1 of 15)	141578974	141579373	3	141465671	141830538	364868	1	22253	ENSMUST00000142762.1	113303	ENSMUSG00000059921	unc-5 netrin receptor C
Zcchc13	0.898061	4.5414	0.014088	0.368966	Distal Intergenic	103636212	103636611	20	103630586	103631670	1085	1	75064	ENSMUST00000033692.8	5626	ENSMUSG00000031330	zinc finger, CCHC domain containing 13
4930483O08Rik	2.48646	1.82917	0.01412	0.368966	Distal Intergenic	133187722	133188121	7	133128251	133142457	14207	1	74970	ENSMUST00000209850.1	59471	ENSMUSG00000109816	RIKEN cDNA 4930483O08 gene
Prok2	1.47786	-2.09931	0.0142217	0.368966	Distal Intergenic	99963367	99963766	6	99722105	99726392	4288	2	50501	ENSMUST00000203738.1	-236975	ENSMUSG00000030069	prokineticin 2
Plk2	2.32701	-1.52217	0.0142299	0.368966	Intron (ENSMUST00000210049.1/ENSMUST00000210049.1, intron 5 of 5)	110639145	110639544	13	110397797	110399035	1239	1	20620	ENSMUST00000225156.1	241348	ENSMUSG00000021701	polo like kinase 2
Adamtsl1	3.01866	1.49177	0.0142576	0.368966	Intron (ENSMUST00000213098.1/77739, intron 1 of 3)	85712493	85712892	4	85514172	86110862	596691	1	77739	ENSMUST00000213098.1	198321	ENSMUSG00000066113	ADAMTS-like 1
Gpr84	3.38731	-1.10671	0.0142945	0.368966	Intron (ENSMUST00000231068.1/ENSMUST00000231068.1, intron 1 of 1)	103305148	103305547	15	103308235	103310612	2378	2	80910	ENSMUST00000079824.5	5065	ENSMUSG00000063234	G protein-coupled receptor 84
Elfn2	3.68674	1.16634	0.0143249	0.368966	Promoter (2-3kb)	78672623	78673022	15	78674383	78675226	844	2	207393	ENSMUST00000230478.1	2204	ENSMUSG00000043460	leucine rich repeat and fibronectin type III, extracellular 2
Clcf1	5.35444	0.593413	0.0143809	0.368966	Promoter (<=1kb)	4215521	4215920	19	4214594	4222513	7920	1	56708	ENSMUST00000126457.1	927	ENSMUSG00000040663	cardiotrophin-like cytokine factor 1
Gm45924	1.64129	2.86375	0.0143918	0.368966	Distal Intergenic	38707449	38707848	15	38713483	38728516	15034	2	105463124	ENSMUST00000226763.1	20668	ENSMUSG00000115620	predicted gene, 45924
Adora1	5.29867	-0.552004	0.0144524	0.368966	Promoter (<=1kb)	134234805	134235204	1	134203397	134235364	31968	2	11539	ENSMUST00000187631.1	160	ENSMUSG00000042429	adenosine A1 receptor
Mnt	2.9085	-1.26095	0.0144657	0.368966	Promoter (<=1kb)	74830182	74830581	11	74830920	74845725	14806	1	17428	ENSMUST00000000291.8	-339	ENSMUSG00000000282	max binding protein
Fezf1	8.41057	-0.453148	0.0146293	0.371597	Promoter (<=1kb)	23247740	23248139	6	23245044	23248362	3319	2	73191	ENSMUST00000031709.6	223	ENSMUSG00000029697	Fez family zinc finger 1
Gpr26	0.863804	4.50765	0.0147726	0.373296	Exon (ENSMUST00000208353.1/ENSMUST00000208353.1, exon 2 of 4)	131824758	131825157	7	131966460	131994405	27946	1	233919	ENSMUST00000045840.4	-141303	ENSMUSG00000040125	G protein-coupled receptor 26
Trmt11	2.4896	1.80444	0.0148177	0.373296	Distal Intergenic	30404311	30404710	10	30559121	30590109	30989	2	73681	ENSMUST00000215041.1	185399	ENSMUSG00000019792	tRNA methyltransferase 11
Phc2	2.00693	-1.68743	0.0149601	0.374328	Promoter (<=1kb)	128655403	128655802	4	128654738	128712194	57457	1	54383	ENSMUST00000136377.7	665	ENSMUSG00000028796	polyhomeotic 2
Gm11468	2.28055	2.00357	0.0149804	0.374328	Distal Intergenic	166348125	166348524	2	166273908	166294831	20924	1	670775	ENSMUST00000152987.1	74217	ENSMUSG00000084840	predicted gene 11468
Kcnk1	3.87442	-0.921503	0.0151155	0.374957	Promoter (<=1kb)	125995574	125995973	8	125995436	126030683	35248	1	16525	ENSMUST00000212831.1	138	ENSMUSG00000033998	potassium channel, subfamily K, member 1
Htatip2	0.87761	4.52138	0.0151276	0.374957	Distal Intergenic	49720659	49721058	7	49759115	49762759	3645	1	53415	ENSMUST00000208048.1	-38057	ENSMUSG00000039745	HIV-1 Tat interactive protein 2
Lrmda	1.60714	-1.99801	0.0153537	0.379032	Promoter (2-3kb)	22022233	22022632	14	22019848	23056085	1036238	1	76633	ENSMUST00000162540.1	2385	ENSMUSG00000063458	leucine rich melanocyte differentiation associated
Otx2	5.24335	0.59912	0.015538	0.382048	Intron (ENSMUST00000228153.1/606497, intron 2 of 4)	48738192	48738591	14	48657851	48673819	15969	2	18424	ENSMUST00000227404.1	-64373	ENSMUSG00000021848	orthodenticle homeobox 2
Pxdc1	4.6302	0.745314	0.0158258	0.385585	Promoter (<=1kb)	34651893	34652292	13	34627840	34652681	24842	2	66895	ENSMUST00000021847.14	389	ENSMUSG00000021411	PX domain containing 1
Car8	2.66888	1.65513	0.0158727	0.385585	Distal Intergenic	7992792	7993191	4	8143362	8239041	95680	2	12319	ENSMUST00000066674.7	245850	ENSMUSG00000041261	carbonic anhydrase 8
Mir7235	1.71938	-1.87581	0.0159062	0.385585	Downstream (2-3kb)	97133191	97133590	11	97146364	97146419	56	2	102466822	ENSMUST00000183796.1	12829	ENSMUSG00000099286	microRNA 7235
Irf4	5.34415	0.575129	0.0159881	0.385585	Promoter (<=1kb)	30749135	30749534	13	30749226	30766976	17751	1	16364	ENSMUST00000021784.9	0	ENSMUSG00000021356	interferon regulatory factor 4
Rspo3	4.69668	0.727936	0.016045	0.385585	Promoter (1-2kb)	29533783	29534182	10	29452418	29535867	83450	2	72780	ENSMUST00000092623.4	1685	ENSMUSG00000019880	R-spondin 3
Strit1	0.845487	4.48985	0.0160596	0.385585	Distal Intergenic	63569320	63569719	3	63481112	63483879	2768	2	102637511	ENSMUST00000192926.1	-85441	ENSMUSG00000103476	small transmembrane regulator of ion transport 1
1700028P15Rik	3.4289	1.24915	0.0161209	0.385585	Distal Intergenic	171591481	171591880	2	171958188	171962131	3944	2	75655	ENSMUST00000151904.1	370251	ENSMUSG00000086823	RIKEN cDNA 1700028P15 gene
Inpp5a	2.45075	-1.41789	0.0162183	0.386412	Intron (ENSMUST00000106098.7/212111, intron 9 of 15)	139544854	139545253	7	139523858	139575209	51352	1	212111	ENSMUST00000152475.1	20996	ENSMUSG00000025477	inositol polyphosphate-5-phosphatase A
3110009F21Rik	3.73167	1.10972	0.0163872	0.387782	Distal Intergenic	110188452	110188851	12	110151654	110158077	6424	2	67280	ENSMUST00000223217.1	-30375	ENSMUSG00000113331	RIKEN cDNA 3110009F21 gene
3010001F23Rik	1.62614	2.84815	0.016402	0.387782	Promoter (1-2kb)	152403638	152404037	20	152402596	152416698	14103	1	75693	ENSMUST00000157022.1	1042	ENSMUSG00000084885	RIKEN cDNA 3010001F23 gene
Tenm3	2.1799	-1.55394	0.0165184	0.388503	Promoter (<=1kb)	48555739	48556138	8	48395436	48555846	160411	2	23965	ENSMUST00000110345.7	0	ENSMUSG00000031561	teneurin transmembrane protein 3
Chic1	2.0087	2.32433	0.0165589	0.388503	Promoter (<=1kb)	103355203	103355602	20	103356476	103396092	39617	1	12212	ENSMUST00000116547.2	-874	ENSMUSG00000031327	cysteine-rich hydrophobic domain 1
Ano4	4.80474	0.68136	0.0170604	0.395127	Promoter (<=1kb)	89344746	89345145	10	89088290	89344645	256356	2	320091	ENSMUST00000182624.2	-101	ENSMUSG00000035189	anoctamin 4
Pinc	0.300674	-3.1908	0.0172076	0.395127	Distal Intergenic	73458560	73458959	1	73395334	73407569	12236	2	723792	ENSMUST00000190487.1	-50991	NA	pregnancy induced noncoding RNA
Tmem179	2.69136	-1.30646	0.0172499	0.395127	Promoter (<=1kb)	112511146	112511545	12	112500189	112511172	10984	2	104885	ENSMUST00000066791.6	0	ENSMUSG00000054013	transmembrane protein 179
Tmem163	3.2176	1.33935	0.0172841	0.395127	Promoter (2-3kb)	127534610	127535009	1	127491545	127537430	45886	2	72160	ENSMUST00000162406.1	2421	ENSMUSG00000026347	transmembrane protein 163
Tbc1d2b	2.46722	-1.40356	0.0173193	0.395127	Distal Intergenic	90694138	90694537	9	90229053	90270804	41752	2	67016	ENSMUST00000144348.7	-423334	ENSMUSG00000037410	TBC1 domain family, member 2B
1700057H15Rik	0.78977	4.43505	0.017333	0.395127	Intron (ENSMUST00000143859.7/78460, intron 2 of 3)	124460696	124461095	4	124414416	124451295	36880	2	78460	ENSMUST00000127913.7	-9401	NA	RIKEN cDNA 1700057H15 gene
Mroh5	4.27337	-0.769149	0.0175234	0.395127	Promoter (<=1kb)	73839767	73840166	15	73796736	73839699	42964	2	268816	ENSMUST00000136698.1	-68	ENSMUSG00000072487	maestro heat-like repeat family member 5
Arhgap26	1.97648	-1.66365	0.0175623	0.395127	Promoter (<=1kb)	38993356	38993755	18	38993476	39371162	377687	1	71302	ENSMUST00000155576.7	0	ENSMUSG00000036452	Rho GTPase activating protein 26
Gm5148	1.58482	2.79076	0.0176424	0.395127	Distal Intergenic	37687103	37687502	3	37714198	37724329	10132	2	381438	ENSMUST00000108105.1	36827	ENSMUSG00000058174	predicted gene 5148
Lman1	6.09199	0.527475	0.017729	0.395127	Promoter (<=1kb)	66019636	66020035	18	65993128	66019778	26651	2	70361	ENSMUST00000150133.2	0	ENSMUSG00000041891	lectin, mannose-binding, 1
Mlxipl	3.77623	1.07956	0.017747	0.395127	Promoter (<=1kb)	135133492	135133891	5	135133610	135134610	1001	1	58805	ENSMUST00000154840.2	0	ENSMUSG00000005373	MLX interacting protein-like
Kiz	7.90864	0.477411	0.0177958	0.395127	Intron (ENSMUST00000139345.1/ENSMUST00000139345.1, intron 1 of 1)	146838727	146839126	2	146855864	146970097	114234	1	228730	ENSMUST00000099278.8	-16738	ENSMUSG00000074749	kizuna centrosomal protein
1700044C05Rik	6.38317	0.521974	0.0177968	0.395127	Distal Intergenic	118437334	118437733	14	118365878	118398170	32293	1	73306	ENSMUST00000186060.1	71456	ENSMUSG00000099911	RIKEN cDNA 1700044C05 gene
Hid1	0.741313	-2.7382	0.0178104	0.395127	Promoter (4-5kb)	115345789	115346188	11	115349009	115351003	1995	2	217310	ENSMUST00000146256.1	4815	ENSMUSG00000034586	HID1 domain containing
Foxp1	3.15046	-1.13866	0.01785	0.395127	Promoter (<=1kb)	99027633	99028032	6	99016550	99027991	11442	2	108655	ENSMUST00000175670.1	0	ENSMUSG00000030067	forkhead box P1
Mctp2	2.64958	1.6338	0.0178923	0.395127	Promoter (<=1kb)	72306316	72306715	7	72077830	72306608	228779	2	244049	ENSMUST00000079323.7	0	ENSMUSG00000032776	multiple C2 domains, transmembrane 2
Pnma2	3.79068	-0.934344	0.0179354	0.395127	Promoter (<=1kb)	66909944	66910343	14	66911170	66921023	9854	1	239157	ENSMUST00000089236.10	-827	ENSMUSG00000046204	paraneoplastic antigen MA2
Lfng	4.71133	0.706324	0.0180457	0.395127	Promoter (<=1kb)	140606944	140607343	5	140607320	140615545	8226	1	16848	ENSMUST00000031555.2	0	ENSMUSG00000029570	LFNG O-fucosylpeptide 3-beta-N-acetylglucosaminyltransferase
Eva1c	4.72078	0.696132	0.0180645	0.395127	Promoter (<=1kb)	90831178	90831577	16	90831113	90904695	73583	1	70967	ENSMUST00000099543.9	65	ENSMUSG00000039903	eva-1 homolog C (C. elegans)
1700029N11Rik	2.29031	-1.48314	0.0181269	0.395127	Intron (ENSMUST00000222236.1/ENSMUST00000222236.1, intron 1 of 3)	44493472	44493871	13	44439736	44469030	29295	1	69491	ENSMUST00000220639.1	53736	ENSMUSG00000098144	RIKEN cDNA 1700029N11 gene
Mir7673	0.768637	4.41433	0.0182665	0.396765	Intron (ENSMUST00000113916.9/236904, intron 2 of 2)	94265607	94266006	20	94274574	94274637	64	1	102466238	ENSMUST00000184567.1	-8568	ENSMUSG00000099072	microRNA 7673
Ocln	5.79692	0.523186	0.0185164	0.400776	Promoter (<=1kb)	100552449	100552848	13	100496507	100552498	55992	2	18260	ENSMUST00000069756.10	0	ENSMUSG00000021638	occludin
Gm6249	1.57979	2.76371	0.0190039	0.408976	Distal Intergenic	136781907	136782306	7	136667955	136710604	42650	2	621677	ENSMUST00000211142.1	-71303	ENSMUSG00000110101	predicted gene 6249
Slc43a1	4.69067	0.699846	0.0190307	0.408976	Promoter (<=1kb)	84839544	84839943	2	84839417	84862388	22972	1	72401	ENSMUST00000145004.1	127	ENSMUSG00000027075	solute carrier family 43, member 1
1700073E17Rik	2.07007	-1.60254	0.0190949	0.408976	Distal Intergenic	145339404	145339803	6	145391426	145392166	741	1	381827	ENSMUST00000148424.1	-51623	NA	ribosomal protein L7 pseudogene
A330048O09Rik	0.766013	4.41543	0.0191917	0.409623	Distal Intergenic	48316943	48317342	13	48272413	48273884	1472	2	320315	ENSMUST00000180777.2	-43059	ENSMUSG00000097326	RIKEN cDNA A330048O09 gene
Ss18	3.17987	1.32569	0.0193216	0.410968	Distal Intergenic	14459298	14459697	18	14633542	14637406	3865	2	268996	ENSMUST00000238844.1	177709	ENSMUSG00000037013	SS18, nBAF chromatin remodeling complex subunit
Vangl1	3.81337	-0.911167	0.0195846	0.412666	Promoter (<=1kb)	102204533	102204932	3	102153583	102204693	51111	2	229658	ENSMUST00000029453.12	0	ENSMUSG00000027860	VANGL planar cell polarity 1
Phox2a	5.5563	0.538768	0.0196028	0.412666	Promoter (1-2kb)	101819503	101819902	7	101818313	101822726	4414	1	11859	ENSMUST00000008090.10	1190	ENSMUSG00000007946	paired-like homeobox 2a
D230030E09Rik	4.31729	0.830024	0.0196028	0.412666	Promoter (<=1kb)	118529703	118530102	12	118518297	118530193	11897	2	100384890	ENSMUST00000222459.1	91	ENSMUSG00000113875	Riken cDNA D230030E09 gene
9530036O11Rik	5.68202	0.523742	0.0198903	0.414967	Promoter (3-4kb)	28461787	28462186	5	28458274	28933995	475722	1	654796	ENSMUST00000180878.7	3513	ENSMUSG00000097726	RIKEN cDNA 9530036O11Rik
Phlda2	6.29644	0.511827	0.0199142	0.414967	Promoter (<=1kb)	143502118	143502517	7	143501545	143502541	997	2	22113	ENSMUST00000010904.4	24	ENSMUSG00000010760	pleckstrin homology like domain, family A, member 2
Insm1	0.73557	4.38184	0.019969	0.414967	Promoter (2-3kb)	146224877	146225276	2	146221921	146225020	3100	1	53626	ENSMUST00000089257.5	2956	ENSMUSG00000068154	insulinoma-associated 1
Cntn2	4.20316	-0.770677	0.0200195	0.414967	Promoter (<=1kb)	132542427	132542826	1	132511792	132542865	31074	2	21367	ENSMUST00000190601.6	39	ENSMUSG00000053024	contactin 2
Scube2	0.705425	-2.69357	0.020135	0.414967	Exon (ENSMUST00000106729.7/56788, exon 13 of 22)	109830709	109831108	7	109799094	109840927	41834	2	56788	ENSMUST00000132113.7	9819	ENSMUSG00000007279	signal peptide, CUB domain, EGF-like 2
Meis1	3.08028	-1.13801	0.0201391	0.414967	Promoter (<=1kb)	19014935	19015334	11	18881360	19016289	134930	2	17268	ENSMUST00000177357.3	955	ENSMUSG00000020160	Meis homeobox 1
Tcf7l1	3.16858	1.30926	0.0201847	0.414967	Promoter (<=1kb)	72788162	72788561	6	72632976	72788598	155623	2	21415	ENSMUST00000149446.2	37	ENSMUSG00000055799	transcription factor 7 like 1 (T cell specific, HMG box)
Grik3	7.10368	0.497903	0.0205543	0.421157	Promoter (<=1kb)	125491657	125492056	4	125490700	125714173	223474	1	14807	ENSMUST00000030676.7	957	ENSMUSG00000001985	glutamate receptor, ionotropic, kainate 3
Mad2l2	2.26303	-1.45942	0.0207865	0.422079	Promoter (<=1kb)	148140288	148140687	4	148140724	148145120	4397	1	71890	ENSMUST00000140049.7	-37	ENSMUSG00000029003	MAD2 mitotic arrest deficient-like 2
Col5a1	3.37533	1.20826	0.0208226	0.422079	Promoter (<=1kb)	27887170	27887569	2	27886425	28039514	153090	1	12831	ENSMUST00000028280.13	745	ENSMUSG00000026837	collagen, type V, alpha 1
Scd2	2.61505	-1.31503	0.0208354	0.422079	Distal Intergenic	44284089	44284488	19	44293674	44306864	13191	1	20250	ENSMUST00000026221.6	-9186	ENSMUSG00000025203	stearoyl-Coenzyme A desaturase 2
Slc36a4	3.67086	1.10257	0.0209084	0.422079	Distal Intergenic	15772610	15773009	9	15726888	15738415	11528	1	234967	ENSMUST00000214954.1	45722	ENSMUSG00000043885	solute carrier family 36 (proton/amino acid symporter), member 4
Gas1	6.04312	-0.498665	0.0209426	0.422079	Promoter (1-2kb)	60175485	60175884	13	60175787	60176941	1155	2	14451	ENSMUST00000223933.1	1057	ENSMUSG00000052957	growth arrest specific 1
Jakmip3	6.4947	-0.494832	0.0211441	0.424705	Promoter (<=1kb)	138940891	138941290	7	138940730	139031950	91221	1	74004	ENSMUST00000166163.2	161	ENSMUSG00000056856	janus kinase and microtubule interacting protein 3
Rtbdn	4.45657	-0.682119	0.0212826	0.424705	Promoter (1-2kb)	84945155	84945554	8	84946991	84956603	9613	1	234542	ENSMUST00000067472.13	-1437	ENSMUSG00000048617	retbindin
Scrt2	0.710619	-2.65914	0.0212833	0.424705	Distal Intergenic	152062329	152062728	2	152081529	152095802	14274	1	545474	ENSMUST00000064061.3	-18801	ENSMUSG00000060257	scratch family zinc finger 2
Hey1	1.54964	2.73163	0.0213618	0.424705	Promoter (<=1kb)	8666263	8666662	3	8664796	8666625	1830	2	15213	ENSMUST00000192102.1	0	ENSMUSG00000040289	hairy/enhancer-of-split related with YRPW motif 1
Perp	3.72923	1.06365	0.0214183	0.424705	Promoter (<=1kb)	18844681	18845080	10	18845020	18857073	12054	1	64058	ENSMUST00000019998.8	0	ENSMUSG00000019851	PERP, TP53 apoptosis effector
Epor	5.81151	0.50784	0.0218298	0.431472	Promoter (<=1kb)	21961955	21962354	9	21961484	21962564	1081	2	13857	ENSMUST00000213181.1	210	ENSMUSG00000006235	erythropoietin receptor
Frem3	1.52936	2.73412	0.0220504	0.432554	Promoter (<=1kb)	80611395	80611794	8	80611080	80695356	84277	1	333315	ENSMUST00000039695.6	315	ENSMUSG00000042353	Fras1 related extracellular matrix protein 3
Corin	4.56821	0.721818	0.02208	0.432554	Promoter (<=1kb)	72503535	72503934	5	72300026	72504208	204183	2	53419	ENSMUST00000005352.9	274	ENSMUSG00000005220	corin, serine peptidase
Rhbdd3	1.21303	-2.16767	0.0221082	0.432554	Promoter (<=1kb)	5099284	5099683	11	5099433	5103349	3917	1	279766	ENSMUST00000134267.7	0	ENSMUSG00000034175	rhomboid domain containing 3
Zfp532	3.92471	0.975014	0.022166	0.432554	Intron (ENSMUST00000236404.1/ENSMUST00000236404.1, intron 2 of 3)	65528415	65528814	18	65579912	65689443	109532	1	328977	ENSMUST00000235822.1	-51098	ENSMUSG00000042439	zinc finger protein 532
Cd83	5.87192	-0.489446	0.0224356	0.433201	Promoter (<=1kb)	43785305	43785704	13	43785185	43803128	17944	1	12522	ENSMUST00000221359.1	120	ENSMUSG00000015396	CD83 antigen
Npvf	2.89781	1.41273	0.0224674	0.433201	Distal Intergenic	50681538	50681937	6	50650672	50654439	3768	2	60531	ENSMUST00000031853.7	-27099	ENSMUSG00000029831	neuropeptide VF precursor
Faim2	1.21764	-2.15984	0.0225151	0.433201	Exon (ENSMUST00000023750.8/72393, exon 12 of 12)	99497032	99497431	15	99499513	99510677	11165	2	72393	ENSMUST00000231211.1	13246	ENSMUSG00000023011	Fas apoptotic inhibitory molecule 2
Col14a1	6.13492	0.503237	0.0225684	0.433201	Promoter (<=1kb)	55308051	55308450	15	55307919	55520203	212285	1	12818	ENSMUST00000110221.9	132	ENSMUSG00000022371	collagen, type XIV, alpha 1
Gal3st1	4.94632	-0.565212	0.0227023	0.433201	Exon (ENSMUST00000078757.7/53897, exon 3 of 3)	3998114	3998513	11	3989933	3999308	9376	1	53897	ENSMUST00000109981.1	8181	ENSMUSG00000049721	galactose-3-O-sulfotransferase 1
Mpc1	2.27103	-1.43472	0.0227942	0.433201	Promoter (<=1kb)	8283531	8283930	17	8283762	8297661	13900	1	55951	ENSMUST00000155364.7	0	ENSMUSG00000023861	mitochondrial pyruvate carrier 1
Hapln4	4.99458	-0.553132	0.0227985	0.433201	Promoter (1-2kb)	70085581	70085980	8	70084144	70084887	744	1	330790	ENSMUST00000213092.1	1437	ENSMUSG00000007594	hyaluronan and proteoglycan link protein 4
Mrm1	1.81584	-1.71708	0.0228183	0.433201	Exon (ENSMUST00000155046.1/ENSMUST00000155046.1, exon 2 of 3)	84776998	84777397	11	84814743	84815390	648	2	217038	ENSMUST00000144104.1	37993	ENSMUSG00000018405	mitochondrial rRNA methyltransferase 1
Zfp608	0.672534	4.3239	0.0228486	0.433201	Intron (ENSMUST00000236611.1/ENSMUST00000236611.1, intron 4 of 5)	54780425	54780824	18	54892481	54895562	3082	2	269023	ENSMUST00000237009.1	114738	ENSMUSG00000052713	zinc finger protein 608
Mir384	1.90973	2.21868	0.0229098	0.433201	Distal Intergenic	105334627	105335026	20	105344282	105344369	88	2	723861	ENSMUST00000083565.1	9343	ENSMUSG00000065499	microRNA 384
Bcl3	2.38782	1.7187	0.0229744	0.433201	Promoter (<=1kb)	19809946	19810345	7	19808462	19809663	1202	2	12051	ENSMUST00000135609.7	-283	ENSMUSG00000053175	B cell leukemia/lymphoma 3
Atxn7l1	3.80841	-0.883405	0.0231996	0.435548	Promoter (<=1kb)	33345290	33345689	12	33345305	33368278	22974	1	380753	ENSMUST00000126275.1	0	ENSMUSG00000020564	ataxin 7-like 1
Gpr12	3.84609	0.99619	0.0232502	0.435548	Promoter (<=1kb)	146583707	146584106	5	146582398	146584404	2007	2	14738	ENSMUST00000196096.1	298	ENSMUSG00000041468	G-protein coupled receptor 12
Ccnh	1.49773	2.71643	0.0233114	0.435548	Distal Intergenic	84785244	84785643	13	85189408	85213723	24316	1	66671	ENSMUST00000022030.10	-403765	ENSMUSG00000021548	cyclin H
Myo10	4.51515	-0.65662	0.0234562	0.436886	Promoter (<=1kb)	25622228	25622627	15	25622525	25813673	191149	1	17909	ENSMUST00000110457.7	0	ENSMUSG00000022272	myosin X
Bub3	4.71348	-0.610597	0.0235472	0.436886	Intron (ENSMUST00000124096.7/14183, intron 2 of 6)	131593223	131593622	7	131560710	131571164	10455	1	12237	ENSMUST00000207442.1	32513	ENSMUSG00000066979	BUB3 mitotic checkpoint protein
Wscd2	2.31623	-1.40289	0.0235971	0.436886	Distal Intergenic	113462027	113462426	5	113490447	113589725	99279	1	320916	ENSMUST00000094452.3	-28021	ENSMUSG00000063430	WSC domain containing 2
Mir5127	5.29634	0.54542	0.0237866	0.436886	Intron (ENSMUST00000236629.1/ENSMUST00000236629.1, intron 2 of 2)	81510586	81510985	18	81992010	81992080	71	2	100628596	ENSMUST00000175295.1	481095	ENSMUSG00000093036	microRNA 5127
Fxyd1	6.17657	0.49464	0.0237981	0.436886	Promoter (<=1kb)	31052897	31053296	7	31051681	31053122	1442	2	56188	ENSMUST00000206030.1	0	ENSMUSG00000036570	FXYD domain-containing ion transport regulator 1
Gad2	4.80428	0.64638	0.0238095	0.436886	Promoter (<=1kb)	22622976	22623375	2	22623304	22630001	6698	1	14417	ENSMUST00000156728.1	0	ENSMUSG00000026787	glutamic acid decarboxylase 2
Camta1	1.50523	2.70881	0.0239483	0.438126	Promoter (3-4kb)	151865440	151865839	4	151059525	151861876	802352	2	100072	ENSMUST00000097774.8	-3564	ENSMUSG00000014592	calmodulin binding transcription activator 1
Mir219a-2	5.5496	-0.498621	0.0241228	0.438244	Promoter (<=1kb)	29845764	29846163	2	29845631	29845727	97	2	723904	ENSMUST00000083551.1	-37	ENSMUSG00000065485	microRNA 219a-2
Sertad3	2.50909	-1.30797	0.024209	0.438244	Promoter (<=1kb)	27473327	27473726	7	27473768	27477364	3597	1	170742	ENSMUST00000068641.7	-42	ENSMUSG00000055200	SERTA domain containing 3
Rbpms2	5.16235	0.564207	0.0242169	0.438244	Promoter (<=1kb)	65629299	65629698	9	65629648	65660528	30881	1	71973	ENSMUST00000169003.7	0	ENSMUSG00000032387	RNA binding protein with multiple splicing 2
Chst3	2.16391	1.89246	0.0242531	0.438244	Distal Intergenic	60157659	60158058	10	60181534	60188707	7174	2	53374	ENSMUST00000068690.6	30649	ENSMUSG00000057337	carbohydrate sulfotransferase 3
Slco3a1	2.59048	1.56918	0.0243267	0.438244	Promoter (<=1kb)	74503529	74503928	7	74359654	74504335	144682	2	108116	ENSMUST00000136389.1	407	ENSMUSG00000025790	solute carrier organic anion transporter family, member 3a1
Itga7	5.16409	0.559294	0.0243825	0.438244	Promoter (<=1kb)	128934174	128934573	10	128934056	128941267	7212	1	16404	ENSMUST00000218387.1	118	ENSMUSG00000025348	integrin alpha 7
Igdcc4	1.92033	2.18593	0.0245638	0.439044	Promoter (<=1kb)	65102432	65102831	9	65101535	65135580	34046	1	56741	ENSMUST00000166273.1	897	ENSMUSG00000032816	immunoglobulin superfamily, DCC subclass, member 4
Man1c1	2.41864	-1.34771	0.0245699	0.439044	Promoter (<=1kb)	134703828	134704227	4	134567889	134703767	135879	2	230815	ENSMUST00000176606.1	-61	ENSMUSG00000037306	mannosidase, alpha, class 1C, member 1
Penk	3.45263	1.13926	0.0247823	0.439576	Promoter (<=1kb)	4138335	4138734	4	4133531	4138477	4947	2	18619	ENSMUST00000070375.7	0	ENSMUSG00000045573	preproenkephalin
Cyth2	3.90369	-0.848678	0.0248058	0.439576	Promoter (<=1kb)	45814343	45814742	7	45810855	45814581	3727	2	19158	ENSMUST00000211263.1	0	ENSMUSG00000003269	cytohesin 2
Tacstd2	5.23417	0.54703	0.0248142	0.439576	Promoter (<=1kb)	67535413	67535812	6	67534062	67535796	1735	2	56753	ENSMUST00000058178.5	0	ENSMUSG00000051397	tumor-associated calcium signal transducer 2
Oaf	4.06661	0.889918	0.025146	0.441794	Promoter (<=1kb)	43238950	43239349	9	43221235	43239911	18677	2	102644	ENSMUST00000034512.6	562	ENSMUSG00000032014	out at first homolog
Egr2	7.6069	0.465333	0.0251488	0.441794	Promoter (<=1kb)	67539296	67539695	10	67538683	67542188	3506	1	13654	ENSMUST00000127820.1	613	ENSMUSG00000037868	early growth response 2
Bend5	3.03917	1.30988	0.0251551	0.441794	Promoter (<=1kb)	111415297	111415696	4	111415207	111420538	5332	1	67621	ENSMUST00000138394.1	90	ENSMUSG00000028545	BEN domain containing 5
Prdm6	4.87598	0.617885	0.0252724	0.441794	Promoter (1-2kb)	53466055	53466454	18	53464516	53575857	111342	1	225518	ENSMUST00000091900.10	1539	ENSMUSG00000069378	PR domain containing 6
Nrxn2	2.12783	-1.47571	0.0253307	0.441794	Promoter (<=1kb)	6498694	6499093	19	6497835	6544169	46335	1	18190	ENSMUST00000113459.1	859	ENSMUSG00000033768	neurexin II
Adra1a	5.07674	-0.533117	0.0253707	0.441794	Promoter (1-2kb)	66637004	66637403	14	66635556	66732741	97186	1	11549	ENSMUST00000161339.1	1448	ENSMUSG00000045875	adrenergic receptor, alpha 1a
Foxp1	1.81551	-1.65913	0.0259278	0.449491	Distal Intergenic	98771563	98771962	6	98930171	98935545	5375	2	108655	ENSMUST00000175880.1	163583	ENSMUSG00000030067	forkhead box P1
Ahi1	1.47298	2.67485	0.0259589	0.449491	Distal Intergenic	21100110	21100509	10	21069845	21074406	4562	1	52906	ENSMUST00000215543.1	30265	ENSMUSG00000019986	Abelson helper integration site 1
Hsd3b4	2.65808	-1.24729	0.0261776	0.452005	Exon (ENSMUST00000056096.14/242109, exon 3 of 3)	98427927	98428326	3	98446608	98457043	10436	2	15495	ENSMUST00000188356.2	28717	ENSMUSG00000095143	hydroxy-delta-5-steroid dehydrogenase, 3 beta- and steroid delta-isomerase 4
Fam83g	3.6644	1.05971	0.0262638	0.452223	Promoter (<=1kb)	61683817	61684216	11	61684419	61709951	25533	1	69640	ENSMUST00000093019.5	-203	ENSMUSG00000042377	family with sequence similarity 83, member G
Kcnj1	4.8084	0.63606	0.0263666	0.452724	Distal Intergenic	32408926	32409325	9	32393985	32399197	5213	1	56379	ENSMUST00000172015.2	14941	ENSMUSG00000041248	potassium inwardly-rectifying channel, subfamily J, member 1
Hyal2	1.4124	-1.95337	0.0265063	0.453855	Promoter (<=1kb)	107568705	107569104	9	107569117	107572776	3660	1	15587	ENSMUST00000010191.12	-13	ENSMUSG00000010047	hyaluronoglucosaminidase 2
Zic4	2.07087	-1.50537	0.0268135	0.4557	Intron (ENSMUST00000191272.1/ENSMUST00000191272.1, intron 1 of 2)	91456450	91456849	9	91382410	91388044	5635	1	22774	ENSMUST00000085242.4	74040	ENSMUSG00000036972	zinc finger protein of the cerebellum 4
4932412D23Rik	3.08508	-1.0953	0.0269021	0.4557	Promoter (<=1kb)	42875376	42875775	16	42725702	42875587	149886	2	75722	ENSMUST00000142270.1	0	ENSMUSG00000075070	RIKEN cDNA 4932412D23 gene
Slc16a2	2.37203	1.70154	0.0270558	0.4557	Promoter (1-2kb)	103820489	103820888	20	103697414	103821983	124570	2	20502	ENSMUST00000042664.9	1095	ENSMUSG00000033965	solute carrier family 16 (monocarboxylic acid transporters), member 2
Sp9	5.85926	0.495986	0.0271055	0.4557	Promoter (1-2kb)	73273800	73274199	2	73271966	73284706	12741	1	381373	ENSMUST00000147133.1	1834	ENSMUSG00000068859	trans-acting transcription factor 9
Cdx4	0.609544	4.2667	0.0271328	0.4557	Exon (ENSMUST00000119684.1/ENSMUST00000119684.1, exon 1 of 1)	103336433	103336832	20	103321398	103330592	9195	1	12592	ENSMUST00000033689.2	15035	ENSMUSG00000031326	caudal type homeobox 4
Islr2	6.48358	-0.471554	0.0271483	0.4557	Promoter (<=1kb)	58200135	58200534	9	58199437	58200572	1136	2	320563	ENSMUST00000217050.1	38	ENSMUSG00000051243	immunoglobulin superfamily containing leucine-rich repeat 2
D730050B12Rik	4.70166	0.653079	0.0271747	0.4557	Promoter (<=1kb)	72817095	72817494	13	72809601	72816763	7163	2	78446	ENSMUST00000223149.1	-332	ENSMUSG00000113082	RIKEN cDNA D730050B12 gene
Lmx1a	3.23652	1.19875	0.027207	0.4557	Distal Intergenic	167660961	167661360	1	167689237	167848741	159505	1	110648	ENSMUST00000111377.7	-27877	ENSMUSG00000026686	LIM homeobox transcription factor 1 alpha
Gsx1	2.36408	1.6716	0.0273764	0.457099	Distal Intergenic	147156176	147156575	5	147188696	147190947	2252	1	14842	ENSMUST00000065382.5	-32121	ENSMUSG00000053129	GS homeobox 1
Plekhf2	3.00067	1.3025	0.0274394	0.457099	Distal Intergenic	10980715	10981114	4	10988662	11007676	19015	2	71801	ENSMUST00000054776.3	26562	ENSMUSG00000049969	pleckstrin homology domain containing, family F (with FYVE domain) member 2
Slc6a3	4.57676	0.696634	0.0276308	0.458305	Promoter (<=1kb)	73536422	73536821	13	73536747	73578672	41926	1	13162	ENSMUST00000022100.6	0	ENSMUSG00000021609	solute carrier family 6 (neurotransmitter transporter, dopamine), member 3
Tulp1	3.18312	1.25511	0.0276608	0.458305	Distal Intergenic	28375360	28375759	17	28351515	28365222	13708	2	22157	ENSMUST00000041819.13	-10138	ENSMUSG00000037446	tubby like protein 1
Carm1	3.52052	-0.957087	0.0280596	0.463662	Promoter (<=1kb)	21546381	21546780	9	21546894	21589467	42574	1	59035	ENSMUST00000034703.14	-114	ENSMUSG00000032185	coactivator-associated arginine methyltransferase 1
Rhob	0.603763	4.26066	0.0282005	0.464742	Distal Intergenic	8433319	8433718	12	8497661	8500009	2349	2	11852	ENSMUST00000067384.5	66291	ENSMUSG00000054364	ras homolog family member B
Mir8104	3.39931	-0.983758	0.0284758	0.467464	Promoter (<=1kb)	122679333	122679732	10	122679315	122679415	101	1	102466884	ENSMUST00000185165.1	18	ENSMUSG00000099225	microRNA 8104
Aebp1	4.50857	0.709743	0.0285178	0.467464	Promoter (<=1kb)	5862073	5862472	11	5861947	5872088	10142	1	11568	ENSMUST00000102923.9	126	ENSMUSG00000020473	AE binding protein 1
Tgfb3	1.43457	2.65054	0.0287482	0.469988	Promoter (2-3kb)	86076517	86076916	12	86056745	86079041	22297	2	21809	ENSMUST00000003687.7	2125	ENSMUSG00000021253	transforming growth factor, beta 3
Opcml	2.41605	-1.30623	0.0289085	0.471354	Promoter (<=1kb)	27791327	27791726	9	27790947	28925410	1134464	1	330908	ENSMUST00000115243.8	380	ENSMUSG00000062257	opioid binding protein/cell adhesion molecule-like
Mir34a	6.74894	0.472938	0.0290777	0.472023	Distal Intergenic	150048611	150049010	4	150068454	150068555	102	1	723848	ENSMUST00000083559.1	-19444	ENSMUSG00000065493	microRNA 34a
Pcdh1	5.07882	0.564747	0.0291031	0.472023	Promoter (<=1kb)	38210494	38210893	18	38203444	38210554	7111	2	75599	ENSMUST00000193828.1	0	ENSMUSG00000051375	protocadherin 1
Klf12	3.00749	1.27976	0.0292316	0.472766	Intron (ENSMUST00000192515.1/ENSMUST00000192515.1, intron 1 of 1)	99751660	99752059	14	99874488	99900391	25904	2	16597	ENSMUST00000228612.1	148332	ENSMUSG00000072294	Kruppel-like factor 12
Abcd4	2.31455	-1.34739	0.0293113	0.472766	Distal Intergenic	84625275	84625674	12	84602640	84617413	14774	2	19300	ENSMUST00000223107.1	-7862	ENSMUSG00000021240	ATP-binding cassette, sub-family D (ALD), member 4
Gpnmb	2.57876	1.53269	0.0293796	0.472766	Distal Intergenic	49025163	49025562	6	49036615	49058182	21568	1	93695	ENSMUST00000031840.9	-11053	ENSMUSG00000029816	glycoprotein (transmembrane) nmb
Eya1	6.55758	0.475887	0.0295511	0.473503	Distal Intergenic	14506661	14507060	1	14168958	14310235	141278	2	14048	ENSMUST00000168081.8	-196426	ENSMUSG00000025932	EYA transcriptional coactivator and phosphatase 1
Opa1	1.43068	2.64856	0.0295795	0.473503	Distal Intergenic	29719887	29720286	16	29616625	29618707	2083	1	74143	ENSMUST00000160101.1	103262	ENSMUSG00000038084	OPA1, mitochondrial dynamin like GTPase
Zfp423	6.35905	0.477868	0.0297572	0.474204	Promoter (2-3kb)	87961722	87962121	8	87661810	87959595	297786	2	94187	ENSMUST00000109655.8	-2127	ENSMUSG00000045333	zinc finger protein 423
Kctd9	4.94415	-0.541528	0.0297776	0.474204	Promoter (<=1kb)	67715712	67716111	14	67715937	67739661	23725	1	105440	ENSMUST00000152243.7	0	ENSMUSG00000034327	potassium channel tetramerisation domain containing 9
Megf6	4.69365	0.639813	0.0307173	0.487905	Promoter (<=1kb)	154170435	154170834	4	154170730	154275713	104984	1	230971	ENSMUST00000030897.14	0	ENSMUSG00000057751	multiple EGF-like-domains 6
Kcnn1	1.5202	-1.81265	0.0308087	0.488096	Promoter (<=1kb)	70855980	70856379	8	70843158	70855585	12428	2	84036	ENSMUST00000212086.1	-395	ENSMUSG00000002908	potassium intermediate/small conductance calcium-activated channel, subfamily N, member 1
Hey2	5.77342	0.481535	0.030943	0.488553	Promoter (1-2kb)	30844276	30844675	10	30832359	30842801	10443	2	15214	ENSMUST00000019924.8	-1475	ENSMUSG00000019789	hairy/enhancer-of-split related with YRPW motif 2
Glis3	1.51732	-1.82078	0.031066	0.488553	Intron (ENSMUST00000162022.7/226075, intron 6 of 10)	28332287	28332686	19	28262347	28326006	63660	2	226075	ENSMUST00000159520.7	-6281	ENSMUSG00000052942	GLIS family zinc finger 3
Optc	1.40812	2.62284	0.0310855	0.488553	Promoter (<=1kb)	133907024	133907423	1	133897199	133907172	9974	2	269120	ENSMUST00000124051.8	0	ENSMUSG00000010311	opticin
Lin52	2.74376	-1.17365	0.0311555	0.488553	Promoter (<=1kb)	84451083	84451482	12	84451422	84531573	80152	1	217708	ENSMUST00000137170.2	0	ENSMUSG00000085793	lin-52 homolog (C. elegans)
Tbca	6.52938	-0.460783	0.0313218	0.489318	Distal Intergenic	94707986	94708385	13	94788910	94842922	54013	1	21371	ENSMUST00000046644.6	-80525	ENSMUSG00000042043	tubulin cofactor A
Slc8a1	2.33244	1.64899	0.0313634	0.489318	Promoter (1-2kb)	81671351	81671750	17	81647809	81670187	22379	2	20541	ENSMUST00000234923.1	-1164	ENSMUSG00000054640	solute carrier family 8 (sodium/calcium exchanger), member 1
Lrrtm1	1.64427	-1.70017	0.0316303	0.489889	Promoter (<=1kb)	77243579	77243978	6	77242922	77244112	1191	1	74342	ENSMUST00000161811.1	657	ENSMUSG00000060780	leucine rich repeat transmembrane neuronal 1
Zbtb16	1.41988	2.62069	0.0316457	0.489889	Intron (ENSMUST00000093852.4/235320, intron 2 of 6)	48796845	48797244	9	48654297	48835945	181649	2	235320	ENSMUST00000093852.4	38701	ENSMUSG00000066687	zinc finger and BTB domain containing 16
Nid2	4.78494	-0.560005	0.0316924	0.489889	Promoter (<=1kb)	19751372	19751771	14	19751284	19806130	54847	1	18074	ENSMUST00000225791.1	88	ENSMUSG00000021806	nidogen 2
Tekt4	0.563325	-2.58538	0.0317189	0.489889	Promoter (<=1kb)	25471069	25471468	17	25471590	25476592	5003	1	71840	ENSMUST00000234449.1	-122	ENSMUSG00000024175	tektin 4
Ube2m	5.89733	-0.459489	0.0319117	0.491632	Exon (ENSMUST00000069289.14/109889, exon 7 of 7)	13043762	13044161	7	13035120	13038275	3156	2	22192	ENSMUST00000165394.8	-5487	ENSMUSG00000005575	ubiquitin-conjugating enzyme E2M
Zfp574	3.08656	-1.04979	0.0320386	0.491822	Promoter (<=1kb)	25076929	25077328	7	25077205	25083492	6288	1	232976	ENSMUST00000179556.1	0	ENSMUSG00000045252	zinc finger protein 574
Mid1	1.42013	2.63771	0.0321749	0.491822	Promoter (1-2kb)	169928546	169928945	20	169927475	169975259	47785	1	17318	ENSMUST00000149258.1	1071	ENSMUSG00000035299	midline 1
Chrna1	2.46724	-1.26217	0.0322793	0.491822	Intron (ENSMUST00000028515.3/11435, intron 4 of 8)	73572583	73572982	2	73563215	73580338	17124	2	11435	ENSMUST00000028515.3	7356	ENSMUSG00000027107	cholinergic receptor, nicotinic, alpha polypeptide 1 (muscle)
Adcyap1	7.13314	0.458522	0.0324155	0.491822	Promoter (<=1kb)	93201714	93202113	17	93202076	93205563	3488	1	11516	ENSMUST00000234204.1	0	ENSMUSG00000024256	adenylate cyclase activating polypeptide 1
Grin2b	2.87303	-1.10999	0.0324284	0.491822	Promoter (<=1kb)	136172169	136172568	6	136044193	136171889	127697	2	14812	ENSMUST00000188999.2	-280	ENSMUSG00000030209	glutamate receptor, ionotropic, NMDA2B (epsilon 2)
Cdx4	5.30331	0.518285	0.0324704	0.491822	Promoter (<=1kb)	103321754	103322153	20	103321398	103330592	9195	1	12592	ENSMUST00000033689.2	356	ENSMUSG00000031326	caudal type homeobox 4
5730409E04Rik	0.503017	4.1624	0.0325192	0.491822	Distal Intergenic	126603749	126604148	4	126609818	126614371	4554	1	230757	ENSMUST00000097886.3	-5670	ENSMUSG00000073755	RIKEN cDNA 5730409E04Rik gene
Atg4a	0.505762	4.1653	0.0326626	0.491822	Intron (ENSMUST00000101205.2/94216, intron 44 of 44)	141167148	141167547	20	141162095	141163455	1361	1	666468	ENSMUST00000147972.1	5053	ENSMUSG00000079418	autophagy related 4A, cysteine peptidase
Slc8a2	1.39533	2.60947	0.0326941	0.491822	Promoter (1-2kb)	16131430	16131829	7	16130348	16160513	30166	1	110891	ENSMUST00000168693.2	1082	ENSMUSG00000030376	solute carrier family 8 (sodium/calcium exchanger), member 2
Ccn3	2.34836	1.633	0.0328041	0.491822	Promoter (<=1kb)	54746340	54746739	15	54745702	54754039	8338	1	18133	ENSMUST00000050027.8	638	ENSMUSG00000037362	cellular communication network factor 3
Elmo1	0.491604	4.15137	0.0328042	0.491822	Intron (ENSMUST00000181429.7/140580, intron 1 of 6)	20117306	20117705	13	20111512	20342888	231377	1	140580	ENSMUST00000180626.1	5794	ENSMUSG00000041112	engulfment and cell motility 1
Kcng1	1.66633	-1.68067	0.0332759	0.494786	Distal Intergenic	168343650	168344049	2	168260117	168281132	21016	2	241794	ENSMUST00000109191.1	-62518	ENSMUSG00000074575	potassium voltage-gated channel, subfamily G, member 1
Nphs1	1.0891	-2.10686	0.033295	0.494786	Promoter (1-2kb)	30479012	30479411	7	30477865	30486881	9017	1	54631	ENSMUST00000149086.1	1147	ENSMUSG00000006649	nephrosis 1, nephrin
Mir7234	5.81199	0.471641	0.0335019	0.494786	Distal Intergenic	73915253	73915652	7	73819590	73819641	52	1	102465712	ENSMUST00000199151.1	95663	ENSMUSG00000105381	microRNA 7234
Pepd	1.38426	2.60008	0.0335268	0.494786	Intron (ENSMUST00000075068.13/18624, intron 4 of 14)	34939256	34939655	7	34945589	35021746	76158	1	18624	ENSMUST00000161900.7	-5934	ENSMUSG00000063931	peptidase D
Srsf6	1.3985	2.59807	0.033542	0.494786	Distal Intergenic	162864027	162864426	2	162931528	162935208	3681	1	67996	ENSMUST00000193611.5	-67102	ENSMUSG00000016921	serine and arginine-rich splicing factor 6
Tsx	1.44245	2.61954	0.0335725	0.494786	Promoter (1-2kb)	103415705	103416104	20	103414467	103424580	10114	1	22127	ENSMUST00000033691.4	1238	ENSMUSG00000031329	testis specific X-linked gene
Col7a1	1.81063	2.12576	0.0336415	0.494786	Promoter (<=1kb)	108953418	108953817	9	108953586	108984875	31290	1	12836	ENSMUST00000112070.7	0	ENSMUSG00000025650	collagen, type VII, alpha 1
Tas1r2	1.38547	2.60142	0.0336458	0.494786	Distal Intergenic	139711355	139711754	4	139653549	139669855	16307	1	83770	ENSMUST00000166773.1	57806	ENSMUSG00000028738	taste receptor, type 1, member 2
Camk2b	1.47831	-1.78476	0.0341813	0.499557	Intron (ENSMUST00000109813.8/12323, intron 3 of 20)	6007854	6008253	11	5990395	6000448	10054	2	12323	ENSMUST00000130427.7	-7406	ENSMUSG00000057897	calcium/calmodulin-dependent protein kinase II, beta
Myh7b	4.4482	-0.629433	0.0343307	0.499557	Promoter (1-2kb)	155630411	155630810	2	155629060	155630384	1325	1	668940	ENSMUST00000124415.1	1351	ENSMUSG00000074652	myosin, heavy chain 7B, cardiac muscle, beta
Fos	1.37703	2.59248	0.0345288	0.499557	Distal Intergenic	85486473	85486872	12	85474911	85476063	1153	1	14281	ENSMUST00000134311.1	11562	ENSMUSG00000021250	FBJ osteosarcoma oncogene
Itgb5	2.84479	1.32023	0.0345315	0.499557	Promoter (4-5kb)	33833794	33834193	16	33829677	33949153	119477	1	16419	ENSMUST00000069345.5	4117	ENSMUSG00000022817	integrin beta 5
C130074G19Rik	5.46734	0.487812	0.0345405	0.499557	Promoter (<=1kb)	184882526	184882925	1	184871926	184883218	11293	2	226777	ENSMUST00000048308.5	293	ENSMUSG00000039349	RIKEN cDNA C130074G19 gene
Gtf3a	2.97209	1.26896	0.0345471	0.499557	Promoter (<=1kb)	146948369	146948768	5	146948657	146955614	6958	1	66596	ENSMUST00000146511.7	0	ENSMUSG00000016503	general transcription factor III A
Chd5	0.575318	-2.53336	0.0345694	0.499557	Promoter (<=1kb)	152338743	152339142	4	152338887	152390181	51295	1	269610	ENSMUST00000005175.4	0	ENSMUSG00000005045	chromodomain helicase DNA binding protein 5
Nav2	3.2002	1.15946	0.0346971	0.499557	Promoter (<=1kb)	49303826	49304225	7	49304138	49411406	107269	1	78286	ENSMUST00000184928.7	0	ENSMUSG00000052512	neuron navigator 2
Tenm4	1.51673	-1.78268	0.0347016	0.499557	Intron (ENSMUST00000107162.7/23966, intron 7 of 32)	96653908	96654307	7	96644172	96732280	88109	1	23966	ENSMUST00000131541.1	9736	ENSMUSG00000048078	teneurin transmembrane protein 4
Faf1	2.30646	1.61935	0.0348902	0.501098	Intron (ENSMUST00000102724.4/14084, intron 7 of 18)	109763084	109763483	4	109840785	109925378	84594	1	14084	ENSMUST00000155204.1	-77302	ENSMUSG00000010517	Fas-associated factor 1
Gpr26	5.40748	0.493073	0.0349859	0.501302	Intron (ENSMUST00000124096.7/14183, intron 2 of 6)	131775502	131775901	7	131966460	131994405	27946	1	233919	ENSMUST00000045840.4	-190559	ENSMUSG00000040125	G protein-coupled receptor 26
Tll2	1.80547	2.07662	0.035118	0.502024	Intron (ENSMUST00000025986.14/24087, intron 2 of 20)	41181264	41181663	19	41083981	41206774	122794	2	24087	ENSMUST00000169941.1	25111	ENSMUSG00000025013	tolloid-like 2
Exoc3l2	4.11553	0.812442	0.0352467	0.502696	Intron (ENSMUST00000137613.8/74463, intron 2 of 11)	19470695	19471094	7	19463331	19496762	33432	1	74463	ENSMUST00000137613.8	7364	ENSMUSG00000011263	exocyst complex component 3-like 2
Smyd3	3.61177	-0.877973	0.0354898	0.504015	Intron (ENSMUST00000128302.7/69726, intron 5 of 11)	179105983	179106382	1	178957250	178989345	32096	2	69726	ENSMUST00000129393.1	-116638	ENSMUSG00000055067	SET and MYND domain containing 3
Mlkl	2.84344	1.30334	0.0355032	0.504015	Promoter (<=1kb)	111337778	111338177	8	111311797	111338177	26381	2	74568	ENSMUST00000056157.13	0	ENSMUSG00000012519	mixed lineage kinase domain-like
Bend5	1.80053	2.07113	0.0356995	0.505633	Intron (ENSMUST00000106591.7/78933, intron 6 of 8)	111474606	111475005	4	111433319	111459927	26609	1	67621	ENSMUST00000123667.1	41287	ENSMUSG00000028545	BEN domain containing 5
Crybg1	6.83249	0.454762	0.0358352	0.50602	Promoter (<=1kb)	44003747	44004146	10	43950638	44004369	53732	2	11630	ENSMUST00000020017.13	223	ENSMUSG00000019866	crystallin beta-gamma domain containing 1
Lpar3	5.82054	0.468817	0.0358914	0.50602	Promoter (<=1kb)	146220803	146221202	3	146220963	146286186	65224	1	65086	ENSMUST00000039164.3	0	ENSMUSG00000036832	lysophosphatidic acid receptor 3
Ap1b1	0	-3.81689	0.0361503	0.508393	Distal Intergenic	4980452	4980851	11	4986824	5042729	55906	1	11764	ENSMUST00000109897.7	-5973	ENSMUSG00000009090	adaptor protein complex AP-1, beta 1 subunit
Zfp78	2.29953	1.62064	0.0362251	0.508393	Promoter (<=1kb)	6362529	6362928	7	6363280	6381709	18430	1	330463	ENSMUST00000207347.1	-352	ENSMUSG00000055150	zinc finger protein 78
Nol4l	0.458485	4.12435	0.0364293	0.508534	Promoter (<=1kb)	153529727	153530126	2	153407462	153529971	122510	2	329540	ENSMUST00000035346.13	0	ENSMUSG00000061411	nucleolar protein 4-like
Bub3	6.04736	-0.450956	0.0364522	0.508534	Intron (ENSMUST00000124096.7/14183, intron 2 of 6)	131643427	131643826	7	131560710	131571164	10455	1	12237	ENSMUST00000207442.1	82717	ENSMUSG00000066979	BUB3 mitotic checkpoint protein
Slc47a1	4.05099	0.833242	0.0364834	0.508534	Promoter (<=1kb)	61377929	61378328	11	61343401	61378081	34681	2	67473	ENSMUST00000010267.9	0	ENSMUSG00000010122	solute carrier family 47, member 1
Mtmr4	2.64381	-1.17006	0.0369267	0.513549	Promoter (<=1kb)	87591751	87592150	11	87592162	87616302	24141	1	170749	ENSMUST00000103179.9	-12	ENSMUSG00000018401	myotubularin related protein 4
Dbx2	2.95305	1.23421	0.0371052	0.513955	Intron (ENSMUST00000054244.6/223843, intron 2 of 3)	95639865	95640264	15	95624738	95632828	8091	2	223843	ENSMUST00000229611.1	-7037	ENSMUSG00000045608	developing brain homeobox 2
Eps8l1	4.25712	0.760351	0.0371231	0.513955	Promoter (2-3kb)	4471409	4471808	7	4473931	4474584	654	1	67425	ENSMUST00000167068.2	-2123	ENSMUSG00000006154	EPS8-like 1
6430628N08Rik	3.17564	1.14703	0.0376351	0.519115	Promoter (<=1kb)	115890741	115891140	4	115890666	115899227	8562	1	76237	ENSMUST00000165938.1	75	ENSMUSG00000034185	RIKEN cDNA 6430628N08 gene
Frs2	2.29427	1.60545	0.0376648	0.519115	Promoter (1-2kb)	117149862	117150261	10	117101667	117148534	46868	2	327826	ENSMUST00000219104.1	-1328	ENSMUSG00000020170	fibroblast growth factor receptor substrate 2
Mir6346	0	-3.74817	0.0381851	0.522808	Promoter (1-2kb)	118955389	118955788	1	118954220	118954300	81	1	102465176	ENSMUST00000183982.1	1169	ENSMUSG00000098273	microRNA 6346
Doc2a	2.94035	-1.05473	0.0383524	0.522808	Promoter (<=1kb)	126848486	126848885	7	126848797	126852036	3240	1	13446	ENSMUST00000176771.1	0	ENSMUSG00000052301	double C2, alpha
Fosl1	6.00356	-0.444005	0.0383713	0.522808	Promoter (<=1kb)	5448413	5448812	19	5447921	5450520	2600	1	14283	ENSMUST00000235958.1	492	ENSMUSG00000024912	fos-like antigen 1
Elavl2	1.3496	2.56631	0.0384399	0.522808	Promoter (3-4kb)	91379505	91379904	4	91250769	91376496	125728	2	15569	ENSMUST00000107124.9	-3009	ENSMUSG00000008489	ELAV like RNA binding protein 1
Rhbg	3.71968	0.943243	0.0385382	0.522808	Downstream (1-2kb)	88241410	88241809	3	88242874	88254709	11836	2	58176	ENSMUST00000171887.3	12900	ENSMUSG00000104445	Rhesus blood group-associated B glycoprotein
Ntf3	5.93184	0.45495	0.0385579	0.522808	Promoter (<=1kb)	126163752	126164151	6	126101412	126164960	63549	2	18205	ENSMUST00000204542.2	809	ENSMUSG00000049107	neurotrophin 3
Pantr2	1.64213	-1.64199	0.0386468	0.522808	Exon (ENSMUST00000180589.1/66620, exon 4 of 4)	42706686	42707085	1	42707061	42713454	6394	2	66620	ENSMUST00000180589.1	6369	ENSMUSG00000097063	POU domain, class 3, transcription factor 3 adjacent noncoding transcript 2
Tmtc1	4.9669	0.548967	0.0386542	0.522808	Promoter (1-2kb)	148442980	148443379	6	148232430	148444389	211960	2	387314	ENSMUST00000060095.14	1010	ENSMUSG00000030306	transmembrane and tetratricopeptide repeat containing 1
Dicer1	4.00993	0.849894	0.0386982	0.522808	Distal Intergenic	104637132	104637531	12	104691443	104700502	9060	2	192119	ENSMUST00000222115.1	62971	ENSMUSG00000041415	dicer 1, ribonuclease type III
Schip1	2.28029	1.59875	0.0387888	0.52283	Intron (ENSMUST00000182006.3/100505386, intron 4 of 10)	68137043	68137442	3	68064802	68626464	561663	1	30953	ENSMUST00000169909.9	72241	ENSMUSG00000027777	schwannomin interacting protein 1
Npm1	3.20021	1.14391	0.0388699	0.52283	Promoter (<=1kb)	33163014	33163413	11	33152287	33163206	10920	2	18148	ENSMUST00000075641.9	0	ENSMUSG00000057113	nucleophosmin 1
Irx3	4.92101	0.553796	0.0390576	0.524208	Distal Intergenic	91992951	91993350	8	91798525	91802067	3543	2	16373	ENSMUST00000175795.3	-190884	ENSMUSG00000031734	Iroquois related homeobox 3
Fgf20	5.02677	0.538478	0.0392357	0.525451	Promoter (<=1kb)	40286230	40286629	8	40279166	40286953	7788	2	80857	ENSMUST00000034014.13	324	ENSMUSG00000031603	fibroblast growth factor 20
Rpp25	5.09929	0.522221	0.0394765	0.527136	Promoter (<=1kb)	57504221	57504620	9	57504026	57505448	1423	1	102614	ENSMUST00000080514.8	195	ENSMUSG00000062309	ribonuclease P/MRP 25 subunit
Morf4l1	2.76179	-1.11449	0.0396416	0.527136	Promoter (<=1kb)	90114545	90114944	9	90091665	90114715	23051	2	21761	ENSMUST00000085248.11	0	ENSMUSG00000062270	mortality factor 4 like 1
Tns3	1.75379	2.05184	0.0396539	0.527136	Promoter (<=1kb)	8664058	8664457	11	8431652	8664535	232884	2	319939	ENSMUST00000020695.12	78	ENSMUSG00000020422	tensin 3
Kcnk9	6.43265	0.449355	0.0398123	0.527136	Promoter (<=1kb)	72547100	72547499	15	72501089	72546340	45252	2	223604	ENSMUST00000044624.7	-760	ENSMUSG00000036760	potassium channel, subfamily K, member 9
Magef1	1.75305	2.05098	0.0398511	0.527136	Distal Intergenic	21347418	21347817	16	21331902	21333356	1455	2	76222	ENSMUST00000231504.1	-14062	ENSMUSG00000116632	MAGE family member F1
Gm6249	1.3357	2.55179	0.0398761	0.527136	Distal Intergenic	136778585	136778984	7	136667955	136710604	42650	2	621677	ENSMUST00000211142.1	-67981	ENSMUSG00000110101	predicted gene 6249
Gipc2	2.59424	-1.15797	0.0406019	0.534569	Promoter (<=1kb)	152165298	152165697	3	152130434	152165750	35317	2	54120	ENSMUST00000133102.1	53	ENSMUSG00000039131	GIPC PDZ domain containing family, member 2
Srrm3	6.35042	-0.43942	0.0406952	0.534569	Promoter (2-3kb)	135857125	135857524	5	135854414	135857509	3096	1	58212	ENSMUST00000135615.1	2711	ENSMUSG00000039860	serine/arginine repetitive matrix 3
Mid1	1.76387	2.07533	0.0406993	0.534569	Intron (ENSMUST00000112107.7/17318, intron 1 of 9)	169693234	169693633	20	169685199	169990798	305600	1	17318	ENSMUST00000112104.7	8035	ENSMUSG00000035299	midline 1
Brms1l	3.23125	-0.967111	0.0409318	0.536084	Promoter (<=1kb)	55836079	55836478	12	55836324	55869736	33413	1	52592	ENSMUST00000059250.7	0	ENSMUSG00000012076	breast cancer metastasis-suppressor 1-like
Iftap	0	-3.68069	0.0412333	0.536084	Distal Intergenic	101658113	101658512	2	101610383	101649532	39150	2	68170	ENSMUST00000177171.1	-8581	ENSMUSG00000027165	intraflagellar transport associated protein
Shf	0	-3.68069	0.0412333	0.536084	Promoter (3-4kb)	122350675	122351074	2	122349504	122354131	4628	2	435684	ENSMUST00000135848.1	3057	ENSMUSG00000033256	Src homology 2 domain containing F
H2-Ab1	5.40776	-0.456201	0.0413695	0.536084	Promoter (1-2kb)	34264771	34265170	17	34263331	34268156	4826	1	14961	ENSMUST00000236643.1	1440	ENSMUSG00000073421	histocompatibility 2, class II antigen A, beta 1
Dgkz	6.2598	-0.438416	0.0413954	0.536084	Promoter (<=1kb)	91975984	91976383	2	91932824	91975864	43041	2	104418	ENSMUST00000099709.9	-120	ENSMUSG00000040479	diacylglycerol kinase zeta
Ak8	3.53179	-0.875024	0.0414129	0.536084	Intron (ENSMUST00000074156.6/68870, intron 10 of 12)	28753459	28753858	2	28742250	28760136	17887	1	68870	ENSMUST00000137588.1	11209	ENSMUSG00000026807	adenylate kinase 8
Rasgef1b	2.08718	-1.36588	0.0414711	0.536084	Intron (ENSMUST00000209346.1/320292, intron 2 of 16)	99570573	99570972	5	99217426	99728812	511387	2	320292	ENSMUST00000209346.1	157840	ENSMUSG00000089809	RasGEF domain family, member 1B
Gm14812	1.32172	2.53716	0.041529	0.536084	Distal Intergenic	99449777	99450176	20	99405331	99443797	38467	2	100038584	ENSMUST00000156494.1	-5980	ENSMUSG00000073051	predicted gene 14812
Fbxo27	2.48555	1.44067	0.0416888	0.536084	Promoter (<=1kb)	28693064	28693463	7	28693144	28699335	6192	1	233040	ENSMUST00000108281.7	0	ENSMUSG00000037463	F-box protein 27
Gpc6	0.371632	4.03967	0.0418864	0.536084	Intron (ENSMUST00000176912.7/103978, intron 7 of 7)	116517685	116518084	14	116925315	117627198	701884	1	23888	ENSMUST00000123239.1	-407231	ENSMUSG00000058571	glypican 6
Mid1	2.05582	1.77205	0.0418941	0.536084	Intron (ENSMUST00000112107.7/17318, intron 2 of 9)	169847453	169847852	20	169828159	169990798	162640	1	17318	ENSMUST00000036753.11	19294	ENSMUSG00000035299	midline 1
Dnpep	4.96668	-0.507127	0.0419059	0.536084	Promoter (<=1kb)	75317523	75317922	1	75307896	75317637	9742	2	13437	ENSMUST00000066668.13	0	ENSMUSG00000026209	aspartyl aminopeptidase
Dchs2	0.359046	4.02756	0.0419523	0.536084	Distal Intergenic	83110498	83110897	3	83127948	83357209	229262	1	100534287	ENSMUST00000191829.1	-17051	ENSMUSG00000102692	dachsous cadherin related 2
B230312C02Rik	4.62781	-0.564169	0.0420355	0.536084	Promoter (<=1kb)	180385561	180385960	2	180370491	180385885	15395	2	320485	ENSMUST00000145549.1	0	NA	RIKEN cDNA B230312C02 gene
5031425F14Rik	1.73165	-1.56499	0.0422592	0.53782	Promoter (<=1kb)	166447851	166448250	2	166447451	166459232	11782	1	319684	ENSMUST00000127920.1	400	NA	RIKEN cDNA 5031425F14 gene
Pdgfa	4.92035	0.572749	0.04269	0.542181	Promoter (<=1kb)	138993582	138993981	5	138977145	138994281	17137	2	18590	ENSMUST00000144934.7	300	ENSMUSG00000025856	platelet derived growth factor, alpha
Xkr7	4.05985	-0.717453	0.0428746	0.54252	Promoter (<=1kb)	153032453	153032852	2	153031852	153055775	23924	1	228787	ENSMUST00000037235.6	601	ENSMUSG00000042631	X-linked Kx blood group related 7
Ankrd34c	2.05399	1.74583	0.0428932	0.54252	Promoter (<=1kb)	89737608	89738007	9	89725245	89738445	13201	2	330998	ENSMUST00000060700.3	438	ENSMUSG00000047606	ankyrin repeat domain 34C
Tbc1d4	2.29958	1.56865	0.0431398	0.544518	Promoter (<=1kb)	101607923	101608322	14	101443723	101608486	164764	2	210789	ENSMUST00000162617.7	164	ENSMUSG00000033083	TBC1 domain family, member 4
Aass	0.343397	4.0122	0.0435241	0.547513	Distal Intergenic	23178749	23179148	6	23072173	23132986	60814	2	30956	ENSMUST00000031707.13	-45763	ENSMUSG00000029695	aminoadipate-semialdehyde synthase
5430421F17Rik	2.62249	1.34706	0.0435921	0.547513	Distal Intergenic	25353863	25354262	8	25302650	25306270	3621	2	74489	ENSMUST00000210268.1	-47593	ENSMUSG00000110140	RIKEN cDNA 5430421F17 gene
Zcchc13	0.346399	4.01539	0.0436442	0.547513	Distal Intergenic	103666838	103667237	20	103630586	103631670	1085	1	75064	ENSMUST00000033692.8	36252	ENSMUSG00000031330	zinc finger, CCHC domain containing 13
Eif5a	3.93959	-0.757749	0.043811	0.548485	Promoter (<=1kb)	69921385	69921784	11	69916720	69921386	4667	2	276770	ENSMUST00000043419.9	0	ENSMUSG00000078812	eukaryotic translation initiation factor 5A
2410002F23Rik	2.24372	-1.30835	0.0440041	0.549783	Promoter (<=1kb)	44246363	44246762	7	44246722	44252319	5598	1	668661	ENSMUST00000055858.13	0	ENSMUSG00000045411	RIKEN cDNA 2410002F23 gene
Ajuba	4.29993	0.713058	0.0442151	0.55097	Promoter (<=1kb)	54576340	54576739	14	54567472	54577558	10087	2	16475	ENSMUST00000054487.9	819	ENSMUSG00000022178	ajuba LIM protein
Rbfox1	3.3702	1.03166	0.0443119	0.55097	Intron (ENSMUST00000230658.1/268859, intron 4 of 11)	6963429	6963828	16	7069846	7409813	339968	1	268859	ENSMUST00000229741.1	-106018	ENSMUSG00000008658	RNA binding protein, fox-1 homolog (C. elegans) 1
4930447C04Rik	2.66537	1.33074	0.0444201	0.55097	Distal Intergenic	72975662	72976061	12	72911659	72940774	29116	2	75801	ENSMUST00000136075.7	-34888	ENSMUSG00000021098	RIKEN cDNA 4930447C04 gene
Cacna1g	2.01791	1.75668	0.0444576	0.55097	Intron (ENSMUST00000100561.9/12291, intron 17 of 35)	94433261	94433660	11	94425240	94426462	1223	2	12291	ENSMUST00000133000.1	-6799	ENSMUSG00000020866	calcium channel, voltage-dependent, T type, alpha 1G subunit
Pdlim1	2.62754	1.33827	0.0446542	0.552292	Promoter (<=1kb)	40271048	40271447	19	40221173	40271616	50444	2	54132	ENSMUST00000068439.12	169	ENSMUSG00000055044	PDZ and LIM domain 1 (elfin)
Cdca7	1.73028	2.01342	0.0449305	0.553518	Distal Intergenic	72518210	72518609	2	72485107	72486202	1096	1	66953	ENSMUST00000137880.1	33103	ENSMUSG00000055612	cell division cycle associated 7
Alkbh6	2.67908	-1.10844	0.0450058	0.553518	Promoter (<=1kb)	30308482	30308881	7	30308717	30314304	5588	1	233065	ENSMUST00000060834.11	0	ENSMUSG00000042831	alkB homolog 6
Draxin	3.42578	-0.894086	0.0450482	0.553518	Promoter (<=1kb)	148130638	148131037	4	148098437	148130698	32262	2	70433	ENSMUST00000030862.4	0	ENSMUSG00000029005	dorsal inhibitory axon guidance protein
Pls1	2.04705	1.74408	0.0451859	0.553518	Promoter (<=1kb)	95844923	95845322	9	95752642	95845286	92645	2	102502	ENSMUST00000093800.8	0	ENSMUSG00000049493	plastin 1 (I-isoform)
Iqsec1	2.6607	1.32561	0.0452035	0.553518	Promoter (<=1kb)	90987447	90987846	6	90660981	90988685	327705	2	232227	ENSMUST00000212100.1	839	ENSMUSG00000034312	IQ motif and Sec7 domain 1
Ubl4b	0.83368	-2.15988	0.0453966	0.55352	Promoter (3-4kb)	107551094	107551493	3	107553687	107555073	1387	2	67591	ENSMUST00000052853.7	3580	ENSMUSG00000055891	ubiquitin-like 4B
Klhl14	6.22081	0.437982	0.0454194	0.55352	Promoter (<=1kb)	21651876	21652275	18	21550377	21652368	101992	2	225266	ENSMUST00000049105.10	93	ENSMUSG00000042514	kelch-like 14
Lamb1	5.68107	0.449976	0.0454738	0.55352	Promoter (<=1kb)	31265733	31266132	12	31265297	31266793	1497	1	16777	ENSMUST00000170495.1	436	ENSMUSG00000002900	laminin B1
Grp	3.88688	0.84851	0.0455715	0.553612	Promoter (<=1kb)	65873614	65874013	18	65873504	65880258	6755	1	225642	ENSMUST00000173530.3	110	ENSMUSG00000024517	gastrin releasing peptide
Hpdl	3.32113	-0.917103	0.0460257	0.557933	Promoter (<=1kb)	116820702	116821101	4	116819904	116821707	1804	2	242642	ENSMUST00000055436.4	606	ENSMUSG00000043155	4-hydroxyphenylpyruvate dioxygenase-like
Kifc3	1.31696	2.48626	0.0461198	0.557933	Intron (ENSMUST00000212424.1/16582, intron 1 of 4)	95155391	95155790	8	95099828	95142547	42720	2	16582	ENSMUST00000034240.14	-12844	ENSMUSG00000031788	kinesin family member C3
Atp2a3	5.59813	0.452004	0.0462662	0.557933	Promoter (<=1kb)	72961267	72961666	11	72961290	72970760	9471	1	53313	ENSMUST00000149493.1	0	ENSMUSG00000020788	ATPase, Ca++ transporting, ubiquitous
Skor2	6.32318	0.433988	0.0462911	0.557933	Distal Intergenic	76817910	76818309	18	76856405	76900342	43938	1	664805	ENSMUST00000166956.1	-38096	ENSMUSG00000091519	SKI family transcriptional corepressor 2
Lman1	4.26825	0.724482	0.046486	0.557933	Promoter (<=1kb)	66002544	66002943	18	65980738	66002639	21902	2	70361	ENSMUST00000048260.14	0	ENSMUSG00000041891	lectin, mannose-binding, 1
Slco3a1	1.72112	1.9966	0.0467117	0.557933	Intron (ENSMUST00000098371.8/108116, intron 1 of 10)	74524632	74525031	7	74504386	74530109	25724	2	108116	ENSMUST00000129292.1	5078	ENSMUSG00000025790	solute carrier organic anion transporter family, member 3a1
Ncs1	2.01701	1.73009	0.0467435	0.557933	Promoter (<=1kb)	31246446	31246845	2	31246166	31292319	46154	1	14299	ENSMUST00000150670.1	280	ENSMUSG00000062661	neuronal calcium sensor 1
Foxh1	3.7769	0.891462	0.0469252	0.557933	Promoter (2-3kb)	76667117	76667516	15	76668925	76669802	878	2	14106	ENSMUST00000230207.1	2286	ENSMUSG00000033837	forkhead box H1
Atg4a	2.47078	1.44878	0.0469283	0.557933	Intron (ENSMUST00000112971.1/666468, intron 9 of 12)	141152099	141152498	20	141162095	141163455	1361	1	666468	ENSMUST00000147972.1	-9597	ENSMUSG00000079418	autophagy related 4A, cysteine peptidase
Nkx1-2	6.42859	0.434692	0.0471343	0.557933	Promoter (1-2kb)	132598164	132598563	7	132594878	132599637	4760	2	20231	ENSMUST00000054562.3	1074	ENSMUSG00000048528	NK1 homeobox 2
Erbb4	3.03846	1.13469	0.0471381	0.557933	Promoter (<=1kb)	69106566	69106965	1	68032186	69107756	1075571	2	13869	ENSMUST00000119142.7	791	ENSMUSG00000062209	erb-b2 receptor tyrosine kinase 4
Speg	1.87473	-1.44142	0.0471828	0.557933	Intron (ENSMUST00000087122.11/11790, intron 6 of 40)	75393122	75393521	1	75400085	75403990	3906	1	11790	ENSMUST00000113589.7	-6564	ENSMUSG00000026207	SPEG complex locus
Foxe3	0.327405	4.00359	0.0472889	0.557933	Distal Intergenic	114939068	114939467	4	114925147	114926013	867	2	30923	ENSMUST00000050940.3	-13055	ENSMUSG00000044518	forkhead box E3
Notch1	2.76682	1.24686	0.047306	0.557933	Promoter (<=1kb)	26503494	26503893	2	26457903	26503822	45920	2	18128	ENSMUST00000028288.4	0	ENSMUSG00000026923	notch 1
Ankrd33b	6.457	0.437572	0.0473169	0.557933	Promoter (<=1kb)	31366709	31367108	15	31293186	31367532	74347	2	67434	ENSMUST00000156679.1	424	ENSMUSG00000022237	ankyrin repeat domain 33B
Itgb5	2.00037	1.727	0.0473794	0.557933	Intron (ENSMUST00000115028.10/16419, intron 10 of 14)	33936549	33936948	16	33946524	33949145	2622	1	16419	ENSMUST00000231409.1	-9576	ENSMUSG00000022817	integrin beta 5
Cnfn	5.01455	0.515399	0.0478067	0.56122	Promoter (1-2kb)	25367915	25368314	7	25367620	25369703	2084	2	72383	ENSMUST00000167591.7	1389	ENSMUSG00000063651	cornifelin
Kbtbd13	3.46462	-0.873231	0.0479061	0.56122	Promoter (<=1kb)	65391004	65391403	9	65388684	65391652	2969	2	74492	ENSMUST00000068307.3	249	ENSMUSG00000054978	kelch repeat and BTB (POZ) domain containing 13
Fzd7	7.2081	-0.410989	0.0479746	0.56122	Promoter (<=1kb)	59483289	59483688	1	59482424	59486955	4532	1	14369	ENSMUST00000114246.3	865	ENSMUSG00000041075	frizzled class receptor 7
Ltbp4	5.13644	0.497312	0.0480237	0.56122	Promoter (1-2kb)	27331890	27332289	7	27311715	27333604	21890	2	108075	ENSMUST00000118961.2	1315	ENSMUSG00000040488	latent transforming growth factor beta binding protein 4
Prune2	2.60695	1.32205	0.0486214	0.567127	Promoter (<=1kb)	16955875	16956274	19	16956118	17055782	99665	1	353211	ENSMUST00000224145.1	0	ENSMUSG00000039126	prune homolog 2
B130024G19Rik	2.45238	1.40226	0.0489746	0.567376	Distal Intergenic	70591491	70591890	7	70388305	70388842	538	1	434198	ENSMUST00000080024.5	203186	ENSMUSG00000100005	RIKEN cDNA B130024G19 gene
Dab1	2.90783	-1.01561	0.0489978	0.567376	Intron (ENSMUST00000143294.7/13131, intron 1 of 3)	103758008	103758407	4	103619665	104680382	1060718	1	13131	ENSMUST00000106827.7	138343	ENSMUSG00000028519	disabled 1
Pim3	0	-2.83458	0.0490458	0.567376	Promoter (1-2kb)	88863245	88863644	15	88862186	88865726	3541	1	223775	ENSMUST00000042818.10	1059	ENSMUSG00000035828	proviral integration site 3
Zic3	3.43395	0.986898	0.0490835	0.567376	Distal Intergenic	58448778	58449177	20	58031010	58041736	10727	1	22773	ENSMUST00000088629.3	417768	ENSMUSG00000067860	zinc finger protein of the cerebellum 3
Pou3f3	0.812495	-2.13023	0.049163	0.567376	Promoter (1-2kb)	42697379	42697778	1	42695768	42703176	7409	1	18993	ENSMUST00000054883.3	1611	ENSMUSG00000045515	POU domain, class 3, transcription factor 3
Aspscr1	1.95424	-1.39441	0.0492263	0.567376	Promoter (<=1kb)	120673044	120673443	11	120673056	120709444	36389	1	68938	ENSMUST00000106158.8	0	ENSMUSG00000025142	alveolar soft part sarcoma chromosome region, candidate 1 (human)
Dgkg	4.16406	-0.664156	0.0492889	0.567376	Promoter (<=1kb)	22656655	22657054	16	22595628	22657028	61401	2	110197	ENSMUST00000150553.1	0	ENSMUSG00000022861	diacylglycerol kinase, gamma
Lin28b	5.10298	0.494694	0.0496319	0.569303	Promoter (2-3kb)	45473023	45473422	10	45376620	45470201	93582	2	380669	ENSMUST00000079390.6	-2822	ENSMUSG00000063804	lin-28 homolog B (C. elegans)
Mki67	3.04818	1.12285	0.0498588	0.569303	Intron (ENSMUST00000211237.1/ENSMUST00000211237.1, intron 1 of 2)	135853033	135853432	7	135689784	135716361	26578	2	17345	ENSMUST00000033310.8	-136672	ENSMUSG00000031004	antigen identified by monoclonal antibody Ki 67
A530065N20Rik	1.68657	1.99316	0.0498826	0.569303	Distal Intergenic	59970866	59971265	13	60029711	60116669	86959	1	328263	ENSMUST00000225266.1	-58446	ENSMUSG00000114531	RIKEN cDNA A530046M15 gene
Tcf20	4.03415	-0.703358	0.0499207	0.569303	Promoter (<=1kb)	82987054	82987453	15	82857130	82987872	130743	2	21411	ENSMUST00000229439.1	419	ENSMUSG00000041852	transcription factor 20
Runx3	2.24785	1.54031	0.0500092	0.569303	Distal Intergenic	135205268	135205667	4	135154436	135155342	907	1	12399	ENSMUST00000127109.1	50832	ENSMUSG00000070691	runt related transcription factor 3
Btbd11	4.08011	0.767759	0.050012	0.569303	Promoter (<=1kb)	85387673	85388072	10	85386827	85640594	253768	1	74007	ENSMUST00000020231.9	846	ENSMUSG00000020042	BTB (POZ) domain containing 11
Adgrl3	3.55371	-0.839566	0.0504709	0.570577	Promoter (<=1kb)	81022409	81022808	5	81021810	81561051	539242	1	319387	ENSMUST00000127046.1	599	ENSMUSG00000037605	adhesion G protein-coupled receptor L3
Klf9	4.94739	0.52849	0.0505044	0.570577	Exon (ENSMUST00000142712.1/ENSMUST00000142712.1, exon 1 of 2)	23134582	23134981	19	23141226	23168134	26909	1	16601	ENSMUST00000036884.2	-6245	ENSMUSG00000033863	Kruppel-like factor 9
1700122O11Rik	4.01993	-0.705331	0.0505421	0.570577	Distal Intergenic	48031270	48031669	17	48036745	48038293	1549	2	76651	ENSMUST00000178823.1	6624	ENSMUSG00000094928	RIKEN cDNA 1700122O11 gene
Acot11	1.96378	-1.38333	0.0506427	0.570577	Distal Intergenic	106827317	106827716	4	106747235	106804998	57764	2	329910	ENSMUST00000065253.12	-22319	ENSMUSG00000034853	acyl-CoA thioesterase 11
Hsbp1l1	0.00548156	-2.8082	0.0507578	0.570577	Promoter (<=1kb)	80235781	80236180	18	80229758	80236833	7076	2	66255	ENSMUST00000237192.1	653	ENSMUSG00000078963	heat shock factor binding protein 1-like 1
Mir7673	2.01962	1.72296	0.0507969	0.570577	Distal Intergenic	94291847	94292246	20	94274574	94274637	64	1	102466238	ENSMUST00000184567.1	17273	ENSMUSG00000099072	microRNA 7673
Tbx3os2	3.67304	0.899994	0.0507985	0.570577	Distal Intergenic	119748281	119748680	5	119685095	119691218	6124	2	433944	ENSMUST00000135385.1	-57063	ENSMUSG00000086847	T-box 3, opposite strand 2
Foxn3	2.43599	1.40876	0.050972	0.570577	Promoter (3-4kb)	99408826	99409225	12	99341503	99412605	71103	2	71375	ENSMUST00000177269.1	3380	ENSMUSG00000033713	forkhead box N3
Papolb	3.26405	1.03578	0.0510237	0.570577	Promoter (<=1kb)	142529936	142530335	5	142525838	142530076	4239	2	56522	ENSMUST00000099400.2	0	ENSMUSG00000074817	poly (A) polymerase beta (testis specific)
Lbx1	2.17195	-1.26837	0.0510521	0.570577	Distal Intergenic	45283346	45283745	19	45232684	45235812	3129	2	16814	ENSMUST00000099401.5	-47534	ENSMUSG00000025216	ladybird homeobox 1
Pianp	5.77678	-0.419814	0.0511476	0.570606	Promoter (<=1kb)	124997245	124997644	6	124997075	124999731	2657	1	319352	ENSMUST00000159391.7	170	ENSMUSG00000030329	PILR alpha associated neural protein
Rnf220	2.01103	1.70284	0.0513011	0.571282	Intron (ENSMUST00000030439.14/66743, intron 2 of 14)	117357115	117357514	4	117271927	117375457	103531	2	66743	ENSMUST00000094853.8	17943	ENSMUSG00000028677	ring finger protein 220
Pkp2	4.82002	0.545562	0.0516161	0.572935	Promoter (<=1kb)	16213756	16214155	16	16213318	16272712	59395	1	67451	ENSMUST00000039408.2	438	ENSMUSG00000041957	plakophilin 2
Exoc3l4	2.17288	-1.27005	0.05167	0.572935	Promoter (4-5kb)	111433318	111433717	12	111429254	111431159	1906	1	74190	ENSMUST00000223369.1	4064	ENSMUSG00000021280	exocyst complex component 3-like 4
Pth1r	3.796	0.871196	0.0517292	0.572935	Promoter (<=1kb)	110743132	110743531	9	110727458	110743648	16191	2	19228	ENSMUST00000196057.1	117	ENSMUSG00000032492	parathyroid hormone 1 receptor
Gstt3	4.56781	0.60196	0.0524615	0.579096	Promoter (<=1kb)	75780671	75781070	10	75771451	75780954	9504	2	103140	ENSMUST00000173512.1	0	ENSMUSG00000001665	glutathione S-transferase, theta 3
Grid2ip	5.47601	0.445382	0.0524738	0.579096	Promoter (<=1kb)	143369970	143370369	5	143370092	143392152	22061	1	170935	ENSMUST00000120825.1	0	ENSMUSG00000010825	glutamate receptor, ionotropic, delta 2 (Grid2) interacting protein 1
Olfml2a	2.42782	1.38655	0.0528056	0.579611	Promoter (<=1kb)	38931839	38932238	2	38931978	38963753	31776	1	241327	ENSMUST00000057279.5	0	ENSMUSG00000046618	olfactomedin-like 2A
Six3os1	7.7126	-0.385943	0.0529154	0.579611	Promoter (<=1kb)	85615146	85615545	17	85600651	85615348	14698	2	100043902	ENSMUST00000175921.3	0	ENSMUSG00000093460	SIX homeobox 3, opposite strand 1
Dlgap1	1.97754	1.69096	0.052973	0.579611	Intron (ENSMUST00000133983.7/224997, intron 8 of 13)	70750697	70751096	17	70809072	70819401	10330	1	224997	ENSMUST00000233780.1	-57976	ENSMUSG00000003279	DLG associated protein 1
Zkscan5	2.26433	-1.2176	0.0530728	0.579611	Promoter (<=1kb)	145204093	145204492	5	145204562	145221750	17189	1	22757	ENSMUST00000085671.9	-70	ENSMUSG00000055991	zinc finger with KRAB and SCAN domains 5
Elf4	5.95483	-0.413818	0.0530848	0.579611	Promoter (<=1kb)	48452945	48453344	20	48411046	48454169	43124	2	56501	ENSMUST00000114958.7	825	ENSMUSG00000031103	E74-like factor 4 (ets domain transcription factor)
Pyy	6.00076	0.421734	0.0530862	0.579611	Promoter (<=1kb)	102107274	102107673	11	102106680	102107416	737	2	217212	ENSMUST00000127381.2	0	ENSMUSG00000017311	peptide YY
Tle4	1.20637	-1.81685	0.0532855	0.580755	Distal Intergenic	15228881	15229280	19	14448150	14598051	149902	2	21888	ENSMUST00000167776.2	-630830	ENSMUSG00000024642	transducin-like enhancer of split 4
Foxp4	2.54488	-1.10911	0.0535151	0.582125	Distal Intergenic	47947189	47947588	17	47867133	47924645	57513	2	74123	ENSMUST00000113265.7	-22544	ENSMUSG00000023991	forkhead box P4
Scube1	4.7436	-0.510552	0.0536006	0.582125	Promoter (<=1kb)	83723591	83723990	15	83607323	83724926	117604	2	64706	ENSMUST00000171496.8	936	ENSMUSG00000016763	signal peptide, CUB domain, EGF-like 1
4930550C17Rik	0.790197	-2.16418	0.0537342	0.582547	Promoter (4-5kb)	56239196	56239595	13	56222224	56243940	21717	2	75245	ENSMUST00000181629.1	4345	ENSMUSG00000097361	RIKEN cDNA 4930550C17 gene
Sfta3-ps	1.97767	1.68551	0.0538647	0.582933	Promoter (3-4kb)	56488961	56489360	12	56488321	56493324	5004	2	104798	ENSMUST00000219680.1	3964	ENSMUSG00000112343	surfactant associated 3, pseudogene
Mro	0.22704	3.90582	0.0542704	0.586292	Distal Intergenic	73888017	73888416	18	73863672	73871980	8309	1	71263	ENSMUST00000134847.1	24345	ENSMUSG00000064036	maestro
Ntm	0.98848	-1.97279	0.0543688	0.586325	Intron (ENSMUST00000075069.10/235106, intron 2 of 7)	29241464	29241863	9	29009228	29185665	176438	2	235106	ENSMUST00000126044.7	-55799	ENSMUSG00000059974	neurotrimin
Foxd1	5.89999	-0.414371	0.0547312	0.589199	Promoter (<=1kb)	98355195	98355594	13	98354242	98359305	5064	1	15229	ENSMUST00000105098.5	953	ENSMUSG00000078302	forkhead box D1
Zbtb8b	3.95056	-0.711541	0.0549649	0.59068	Promoter (<=1kb)	129440487	129440886	4	129425765	129440818	15054	2	215627	ENSMUST00000053042.5	0	ENSMUSG00000048485	zinc finger and BTB domain containing 8b
Itga2b	2.03632	-1.30309	0.0551864	0.591912	Promoter (<=1kb)	102455819	102456218	11	102453304	102456190	2887	2	16399	ENSMUST00000134735.1	0	ENSMUSG00000034664	integrin alpha 2b
Cbs	3.93126	0.797939	0.0552721	0.591912	Promoter (<=1kb)	31636636	31637035	17	31625077	31636790	11714	2	12411	ENSMUST00000155814.7	0	ENSMUSG00000024039	cystathionine beta-synthase
Kctd15	1.68143	1.93926	0.0554218	0.592329	Promoter (<=1kb)	34653016	34653415	7	34652632	34653026	395	2	233107	ENSMUST00000127425.3	0	ENSMUSG00000030499	potassium channel tetramerisation domain containing 15
4930413E15Rik	0.455764	-2.40884	0.0555038	0.592329	Distal Intergenic	119007213	119007612	5	118952339	118961261	8923	1	74627	ENSMUST00000202500.1	54874	ENSMUSG00000107144	RIKEN cDNA 4930413E15 gene
Inhbb	4.71905	0.554895	0.0558098	0.594081	Promoter (<=1kb)	119421946	119422345	1	119415465	119422248	6784	2	16324	ENSMUST00000038765.5	0	ENSMUSG00000037035	inhibin beta-B
9030404E10Rik	0	-2.75901	0.0558612	0.594081	Distal Intergenic	30046288	30046687	16	30021842	30039479	17638	2	71528	ENSMUST00000232465.1	-6809	ENSMUSG00000116660	RIKEN cDNA 9030404E10 gene
Utrn	3.11828	1.05557	0.0561406	0.596021	Promoter (<=1kb)	12867967	12868366	10	12720825	12868171	147347	2	22288	ENSMUST00000219584.1	0	ENSMUSG00000019820	utrophin
Fosb	0.181452	3.86181	0.0562892	0.596051	Distal Intergenic	19318933	19319332	7	19302696	19310051	7356	2	14282	ENSMUST00000003640.3	-8882	ENSMUSG00000003545	FBJ osteosarcoma oncogene B
Lncbate1	3.39635	-0.866236	0.0563946	0.596051	Intron (ENSMUST00000220518.1/11906, intron 3 of 15)	108451323	108451722	8	108553252	108584595	31344	2	109215	ENSMUST00000211953.1	132873	ENSMUSG00000110613	brown adipose tissue enriched long non-coding RNA 1
Gm15867	1.65058	1.94032	0.0564903	0.596051	Promoter (<=1kb)	192853955	192854354	1	192854923	192856246	1324	1	100503471	ENSMUST00000159407.2	-569	NA	predicted gene 15867
Ncam1	1.95632	1.67867	0.0565313	0.596051	Distal Intergenic	49877407	49877806	9	49502136	49798925	296790	2	17967	ENSMUST00000193547.5	-78482	ENSMUSG00000039542	neural cell adhesion molecule 1
C030013C21Rik	3.01251	1.096	0.0568075	0.597938	Intron (ENSMUST00000041065.13/338367, intron 16 of 21)	80604826	80605225	11	80507410	80509106	1697	2	77417	ENSMUST00000133400.1	-95720	ENSMUSG00000085078	RIKEN cDNA C030013C21 gene
Zfp945	3.00247	1.09816	0.0569522	0.598436	Distal Intergenic	22877707	22878106	17	22861729	22867134	5406	2	240041	ENSMUST00000127557.1	-10573	ENSMUSG00000059142	zinc finger protein 945
Dolpp1	3.26694	-0.890546	0.0570585	0.59853	Promoter (<=1kb)	30392047	30392446	2	30392254	30400529	8276	1	57170	ENSMUST00000028209.14	0	ENSMUSG00000026856	dolichyl pyrophosphate phosphatase 1
D230030E09Rik	1.69726	1.93765	0.0574024	0.599402	Intron (ENSMUST00000222459.1/100384890, intron 3 of 3)	118522060	118522459	12	118518297	118530193	11897	2	100384890	ENSMUST00000222459.1	7734	ENSMUSG00000113875	Riken cDNA D230030E09 gene
Ikzf1	4.15285	0.716888	0.0574223	0.599402	Promoter (<=1kb)	11684928	11685327	11	11685003	11707800	22798	1	22778	ENSMUST00000141436.7	0	ENSMUSG00000018654	IKAROS family zinc finger 1
Hlf	1.6629	1.93316	0.0575113	0.599402	Promoter (<=1kb)	90389054	90389453	11	90387923	90389590	1668	2	217082	ENSMUST00000145786.1	137	ENSMUSG00000003949	hepatic leukemia factor
3110039M20Rik	2.71319	-1.04312	0.0576167	0.599402	Promoter (<=1kb)	49391344	49391743	12	49390659	49407138	16480	1	67293	ENSMUST00000145291.2	685	ENSMUSG00000104861	RIKEN cDNA 3110039M20 gene
Ccnjl	1.58474	-1.55899	0.0577832	0.599402	Intron (ENSMUST00000050574.6/380694, intron 2 of 5)	43545475	43545874	11	43529246	43556689	27444	1	380694	ENSMUST00000152153.1	16229	ENSMUSG00000044707	cyclin J-like
Ddx54	3.92587	-0.71767	0.0578266	0.599402	Promoter (<=1kb)	120612590	120612989	5	120612739	120628592	15854	1	71990	ENSMUST00000031598.10	0	ENSMUSG00000029599	DEAD box helicase 54
Lrp4	6.45935	-0.406928	0.0578434	0.599402	Promoter (<=1kb)	91457688	91458087	2	91457511	91513779	56269	1	228357	ENSMUST00000028689.3	177	ENSMUSG00000027253	low density lipoprotein receptor-related protein 4
Tbx5	8.68233	-0.341952	0.0580502	0.599402	Promoter (<=1kb)	119835175	119835574	5	119834663	119885219	50557	1	21388	ENSMUST00000018407.9	512	ENSMUSG00000018263	T-box 5
Zdhhc14	1.42093	-1.64442	0.0581413	0.599402	Promoter (1-2kb)	5491093	5491492	17	5492557	5753811	261255	1	224454	ENSMUST00000089185.5	-1065	ENSMUSG00000034265	zinc finger, DHHC domain containing 14
Ggn	5.80891	-0.409072	0.0582346	0.599402	Promoter (1-2kb)	29171576	29171975	7	29170504	29173933	3430	1	243897	ENSMUST00000208330.1	1072	ENSMUSG00000031493	gametogenetin
Efnb1	0.167235	3.8482	0.0583409	0.599402	Distal Intergenic	99287605	99288004	20	99138131	99147230	9100	1	13641	ENSMUST00000151750.1	149474	ENSMUSG00000031217	ephrin B1
Lamc2	6.0083	-0.407897	0.058399	0.599402	Promoter (<=1kb)	153185981	153186380	1	153122756	153186047	63292	2	16782	ENSMUST00000185356.6	0	ENSMUSG00000026479	laminin, gamma 2
Pgf	1.63802	1.94016	0.0584982	0.599402	Promoter (<=1kb)	85177623	85178022	12	85166635	85177790	11156	2	18654	ENSMUST00000223220.1	0	ENSMUSG00000004791	placental growth factor
Gjb2	5.88882	0.418538	0.0585067	0.599402	Promoter (<=1kb)	57104647	57105046	14	57098600	57104702	6103	2	14619	ENSMUST00000055698.7	0	ENSMUSG00000046352	gap junction protein, beta 2
Cd40	0.149713	3.83104	0.0587878	0.599883	Downstream (1-2kb)	165076504	165076903	2	165062676	165066695	4020	1	21939	ENSMUST00000153105.1	13828	ENSMUSG00000017652	CD40 antigen
Cd37	0.149713	3.83104	0.0587878	0.599883	Promoter (<=1kb)	45237627	45238026	7	45233891	45237087	3197	2	12493	ENSMUST00000209677.1	-540	ENSMUSG00000030798	CD37 antigen
4933417O13Rik	2.72973	1.19522	0.0588465	0.599883	Exon (ENSMUST00000192896.1/ENSMUST00000192896.1, exon 1 of 1)	143345615	143346014	7	143322775	143330650	7876	2	71153	ENSMUST00000188294.1	-14965	ENSMUSG00000101360	RIKEN cDNA 4933417O13 gene
D430041D05Rik	2.85701	1.14595	0.058997	0.600421	Promoter (<=1kb)	104410049	104410448	2	104143073	104410334	267262	2	241589	ENSMUST00000089726.9	0	ENSMUSG00000068373	RIKEN cDNA D430041D05 gene
Gpr50	7.03902	0.402829	0.0591026	0.600502	Promoter (<=1kb)	71664518	71664917	20	71663966	71667392	3427	1	14765	ENSMUST00000144712.6	552	ENSMUSG00000056380	G-protein-coupled receptor 50
Thsd7b	1.24516	-1.76752	0.0592335	0.600839	Promoter (<=1kb)	129273848	129274247	1	129273485	129629012	355528	1	210417	ENSMUST00000140629.1	363	ENSMUSG00000042581	thrombospondin, type I, domain containing 7B
Cmpk1	2.06585	-1.27648	0.0596445	0.602305	Promoter (<=1kb)	114986676	114987075	4	114969277	114987072	17796	2	66588	ENSMUST00000129317.1	0	ENSMUSG00000028719	cytidine monophosphate (UMP-CMP) kinase 1
Slc38a4	4.52758	0.595094	0.0596548	0.602305	Promoter (<=1kb)	97054777	97055176	15	96994823	97055956	61134	2	69354	ENSMUST00000023101.9	780	ENSMUSG00000022464	solute carrier family 38, member 4
Ephb3	2.39314	1.36218	0.059672	0.602305	Promoter (<=1kb)	21205243	21205642	16	21204755	21223304	18550	1	13845	ENSMUST00000006112.6	488	ENSMUSG00000005958	Eph receptor B3
Hmga2	4.06441	0.738072	0.059788	0.602486	Distal Intergenic	120552849	120553248	10	120361275	120476469	115195	2	15364	ENSMUST00000159699.1	-76380	ENSMUSG00000056758	high mobility group AT-hook 2
Tuba8	3.64233	0.876481	0.0601409	0.604457	Promoter (<=1kb)	121210769	121211168	6	121210696	121226854	16159	1	53857	ENSMUST00000032233.8	73	ENSMUSG00000030137	tubulin, alpha 8
Acvr1c	2.99766	1.08573	0.0601802	0.604457	Promoter (<=1kb)	58357278	58357677	2	58274735	58357752	83018	2	269275	ENSMUST00000112607.2	75	ENSMUSG00000026834	activin A receptor, type IC
C1ql2	6.72758	0.405406	0.0603498	0.604737	Promoter (<=1kb)	120340598	120340997	1	120340582	120343174	2593	1	226359	ENSMUST00000037286.9	16	ENSMUSG00000036907	complement component 1, q subcomponent-like 2
Krt8	5.31236	0.447001	0.0604048	0.604737	Promoter (<=1kb)	102003510	102003909	15	101996698	102004482	7785	2	16691	ENSMUST00000023952.9	573	ENSMUSG00000049382	keratin 8
Tle4	1.41807	-1.62572	0.0606706	0.60641	Intron (ENSMUST00000052011.14/21888, intron 19 of 19)	14449981	14450380	19	14543726	14595539	51814	2	21888	ENSMUST00000235975.1	145159	ENSMUSG00000024642	transducin-like enhancer of split 4
Ampd3	2.45847	-1.10777	0.0608432	0.607147	Promoter (<=1kb)	110768653	110769052	7	110768911	110811919	43009	1	11717	ENSMUST00000213373.1	0	ENSMUSG00000005686	adenosine monophosphate deaminase 3
2210406O10Rik	1.19382	2.38554	0.0609419	0.607147	Downstream (2-3kb)	36444414	36444813	5	36455768	36464811	9044	2	76710	ENSMUST00000044964.5	19998	ENSMUSG00000039563	RIKEN cDNA 2210406O10 gene
Mfhas1	2.85842	1.13225	0.0612074	0.607681	Promoter (<=1kb)	35606452	35606851	8	35607277	35677020	69744	1	52065	ENSMUST00000154989.1	-426	ENSMUSG00000070056	malignant fibrous histiocytoma amplified sequence 1
Tmem91	4.77452	0.536779	0.0612259	0.607681	Promoter (<=1kb)	25674435	25674834	7	25669242	25675047	5806	2	320208	ENSMUST00000108404.7	213	ENSMUSG00000061702	transmembrane protein 91
Atp2b3	3.91256	-0.705344	0.061292	0.607681	Promoter (<=1kb)	73503458	73503857	20	73503086	73571005	67920	1	320707	ENSMUST00000114479.1	372	ENSMUSG00000031376	ATPase, Ca++ transporting, plasma membrane 3
Mid1	1.2036	2.39606	0.0618025	0.610318	Distal Intergenic	169594088	169594487	20	169685199	169990795	305597	1	17318	ENSMUST00000112107.7	-90712	ENSMUSG00000035299	midline 1
Bcl3	3.58121	0.88609	0.0618893	0.610318	Promoter (<=1kb)	19821546	19821945	7	19811586	19822157	10572	2	12051	ENSMUST00000139680.1	212	ENSMUSG00000053175	B cell leukemia/lymphoma 3
Wif1	4.22066	-0.618629	0.0620712	0.610318	Promoter (<=1kb)	121033795	121034194	10	121033960	121100650	66691	1	24117	ENSMUST00000020439.10	0	ENSMUSG00000020218	Wnt inhibitory factor 1
Greb1	1.1869	2.37824	0.0621799	0.610318	Promoter (4-5kb)	16805535	16805934	12	16733278	16800886	67609	2	268527	ENSMUST00000161998.2	-4649	ENSMUSG00000036523	gene regulated by estrogen in breast cancer protein
Rtp4	1.19472	2.40978	0.0622001	0.610318	Promoter (<=1kb)	23609710	23610109	16	23609919	23614222	4304	1	67775	ENSMUST00000038423.5	0	ENSMUSG00000033355	receptor transporter protein 4
Rbfox3	6.39262	-0.40051	0.0622298	0.610318	Promoter (<=1kb)	118908220	118908619	11	118811280	118908005	96726	2	52897	ENSMUST00000134774.1	-215	ENSMUSG00000025576	RNA binding protein, fox-1 homolog (C. elegans) 3
Eif2b5	1.21256	2.37519	0.0623361	0.610318	Promoter (1-2kb)	20497225	20497624	16	20498817	20509323	10507	1	224045	ENSMUST00000003320.13	-1193	ENSMUSG00000003235	eukaryotic translation initiation factor 2B, subunit 5 epsilon
Prr18	3.28735	0.976621	0.062529	0.610318	Promoter (<=1kb)	8340910	8341309	17	8340739	8344112	3374	1	320111	ENSMUST00000163887.1	171	ENSMUSG00000055945	proline rich 18
Prkcz	2.49046	-1.09182	0.0625455	0.610318	Promoter (<=1kb)	155345049	155345448	4	155290502	155345165	54664	2	18762	ENSMUST00000131975.7	0	ENSMUSG00000029053	protein kinase C, zeta
Zfp507	1.71212	-1.46945	0.0625508	0.610318	Distal Intergenic	36075361	36075760	7	35772343	35802989	30647	2	668501	ENSMUST00000061586.10	-272372	ENSMUSG00000044452	zinc finger protein 507
Cavin1	3.29904	-0.86891	0.0629918	0.613646	Distal Intergenic	100983248	100983647	11	100956733	100970887	14155	2	19285	ENSMUST00000060792.5	-12361	ENSMUSG00000004044	caveolae associated 1
Akap1	1.93185	-1.31745	0.0630963	0.613692	Intron (ENSMUST00000173677.1/75285, intron 3 of 4)	88873325	88873724	11	88830792	88864586	33795	2	11640	ENSMUST00000018572.10	-8739	ENSMUSG00000018428	A kinase (PRKA) anchor protein 1
4931408C20Rik	0.100252	3.78288	0.0632844	0.614549	Distal Intergenic	27261061	27261460	1	26681814	26687460	5647	2	210940	ENSMUST00000097801.3	-573601	ENSMUSG00000073722	RIKEN cDNA 4931408C20 gene
Tmem163	2.98998	1.06869	0.0635322	0.615649	Intron (ENSMUST00000027585.13/72160, intron 4 of 8)	127529402	127529801	1	127491545	127537430	45886	2	72160	ENSMUST00000162406.1	7629	ENSMUSG00000026347	transmembrane protein 163
Arhgap22	4.60926	0.563486	0.0637144	0.615649	Promoter (<=1kb)	33319931	33320330	14	33319703	33369934	50232	1	239027	ENSMUST00000111955.1	228	ENSMUSG00000063506	Rho GTPase activating protein 22
Col13a1	6.554	0.402663	0.0638752	0.615649	Promoter (<=1kb)	61978260	61978659	10	61848732	61978121	129390	2	12817	ENSMUST00000051826.13	-139	ENSMUSG00000058806	collagen, type XIII, alpha 1
Ablim2	5.18279	-0.431652	0.0639592	0.615649	Promoter (<=1kb)	35758280	35758679	5	35758051	35883419	125369	1	231148	ENSMUST00000129347.7	229	ENSMUSG00000029095	actin-binding LIM protein 2
Acadsb	3.59186	0.879579	0.0639743	0.615649	Intron (ENSMUST00000124096.7/14183, intron 2 of 6)	131466707	131467106	7	131432001	131437519	5519	1	66885	ENSMUST00000136612.2	34706	ENSMUSG00000030861	acyl-Coenzyme A dehydrogenase, short/branched chain
Baiap2	2.12369	-1.2322	0.0639986	0.615649	Promoter (<=1kb)	119943039	119943438	11	119943116	119960532	17417	1	108100	ENSMUST00000152523.7	0	ENSMUSG00000025372	brain-specific angiogenesis inhibitor 1-associated protein 2
Gfra1	5.97571	-0.396541	0.0642195	0.61642	Promoter (<=1kb)	58453229	58453628	19	58236692	58454466	217775	2	14585	ENSMUST00000169850.7	838	ENSMUSG00000025089	glial cell line derived neurotrophic factor family receptor alpha 1
Tle2	6.4338	0.404443	0.0642794	0.61642	Promoter (1-2kb)	81572883	81573282	10	81574561	81590466	15906	1	21886	ENSMUST00000140433.7	-1279	ENSMUSG00000034771	transducin-like enhancer of split 2
Foxo1	4.29142	-0.595156	0.0646054	0.618582	Promoter (<=1kb)	52269298	52269697	3	52268336	52353221	84886	1	56458	ENSMUST00000053764.6	962	ENSMUSG00000044167	forkhead box O1
Foxd3	5.35389	0.435992	0.0647348	0.61867	Exon (ENSMUST00000132108.1/ENSMUST00000132108.1, exon 2 of 2)	99572833	99573232	4	99656299	99658622	2324	1	15221	ENSMUST00000087285.4	-83067	ENSMUSG00000067261	forkhead box D3
Spata3	3.24131	0.991031	0.0648159	0.61867	Promoter (<=1kb)	86018701	86019100	1	86018068	86029248	11181	1	70060	ENSMUST00000149469.2	633	ENSMUSG00000026226	spermatogenesis associated 3
Evpl	2.99004	1.06454	0.065009	0.619551	Promoter (<=1kb)	116237714	116238113	11	116220559	116238077	17519	2	14027	ENSMUST00000037007.3	0	ENSMUSG00000034282	envoplakin
Epha5	1.66793	-1.45087	0.0653404	0.621745	Promoter (1-2kb)	84415231	84415630	5	84057791	84416806	359016	2	13839	ENSMUST00000113403.7	1176	ENSMUSG00000029245	Eph receptor A5
Gm715	2.1731	1.45355	0.0655042	0.622341	Intron (ENSMUST00000152669.1/ENSMUST00000152669.1, intron 3 of 11)	60566413	60566812	20	60548019	60548849	831	1	279618	ENSMUST00000117865.1	18394	ENSMUSG00000082226	predicted gene 715
Rbm28	6.55994	-0.394413	0.0656491	0.622755	Exon (ENSMUST00000159200.1/101359, exon 5 of 5)	29170388	29170787	6	29123576	29165006	41431	2	68272	ENSMUST00000007993.15	-5382	ENSMUSG00000029701	RNA binding motif protein 28
Kcnk6	5.47831	0.423286	0.0658166	0.623382	Promoter (<=1kb)	29231906	29232305	7	29221926	29232515	10590	2	52150	ENSMUST00000085818.5	210	ENSMUSG00000046410	potassium inwardly-rectifying channel, subfamily K, member 6
Crtc1	3.89907	-0.697327	0.0659346	0.62348	Promoter (<=1kb)	70439506	70439905	8	70382355	70439579	57225	2	382056	ENSMUST00000076615.5	0	ENSMUSG00000003575	CREB regulated transcription coactivator 1
Neurod2	9.1603	-0.317687	0.0660299	0.62348	Promoter (1-2kb)	98327250	98327649	11	98325415	98329648	4234	2	18013	ENSMUST00000041685.6	1999	ENSMUSG00000038255	neurogenic differentiation 2
Lypd4	0.10852	3.80027	0.0663788	0.625294	Downstream (<1kb)	24863301	24863700	7	24865325	24869732	4408	2	232973	ENSMUST00000122995.1	6032	ENSMUSG00000062732	Ly6/Plaur domain containing 4
Garnl3	3.39329	0.924841	0.0664254	0.625294	Promoter (<=1kb)	33131105	33131504	2	32986374	33131436	145063	2	99326	ENSMUST00000137381.7	0	ENSMUSG00000038860	GTPase activating RANGAP domain-like 3
Sez6l	5.05691	-0.440241	0.0667052	0.626351	Promoter (<=1kb)	112576404	112576803	5	112422009	112576868	154860	2	56747	ENSMUST00000212758.1	65	ENSMUSG00000058153	seizure related 6 homolog like
Chad	3.19122	0.984224	0.0667415	0.626351	Promoter (<=1kb)	94564571	94564970	11	94565047	94569127	4081	1	12643	ENSMUST00000040418.8	-77	ENSMUSG00000039084	chondroadherin
2900052L18Rik	2.15226	1.45371	0.0669187	0.627057	Distal Intergenic	120225242	120225641	11	120229802	120231585	1784	2	102640779	ENSMUST00000139014.1	5944	NA	RIKEN cDNA 2900052L18 gene
Arhgap36	3.24849	-0.858449	0.0674673	0.630311	Promoter (<=1kb)	49493667	49494066	20	49493899	49495467	1569	1	75404	ENSMUST00000132784.1	0	ENSMUSG00000036198	Rho GTPase activating protein 36
Syf2	1.59564	1.89604	0.0674711	0.630311	Distal Intergenic	134953863	134954262	4	134931010	134936078	5069	1	68592	ENSMUST00000144037.1	22853	ENSMUSG00000028821	SYF2 homolog, RNA splicing factor (S. cerevisiae)
Nfatc4	5.36182	0.428833	0.0676834	0.630318	Promoter (<=1kb)	55826435	55826834	14	55827038	55828926	1889	1	73181	ENSMUST00000227746.1	-204	ENSMUSG00000023411	nuclear factor of activated T cells, cytoplasmic, calcineurin dependent 4
Kdm6b	3.56656	-0.800756	0.067728	0.630318	Exon (ENSMUST00000035539.11/327954, exon 85 of 85)	69420514	69420913	11	69398508	69413675	15168	2	216850	ENSMUST00000094077.4	-6839	ENSMUSG00000018476	KDM1 lysine (K)-specific demethylase 6B
Plekha6	1.40429	-1.58944	0.0677794	0.630318	Intron (ENSMUST00000212252.1/240753, intron 3 of 9)	133187818	133188217	1	133181321	133301219	119899	1	240753	ENSMUST00000187285.6	6497	ENSMUSG00000041757	pleckstrin homology domain containing, family A member 6
Pparg	5.70932	-0.394564	0.0680769	0.631444	Promoter (<=1kb)	115361269	115361668	6	115360951	115490399	129449	1	19016	ENSMUST00000171644.7	318	ENSMUSG00000000440	peroxisome proliferator activated receptor gamma
Olfm2	4.07057	-0.640222	0.0681961	0.631444	Promoter (<=1kb)	20726514	20726913	9	20667696	20726937	59242	2	244723	ENSMUST00000217198.1	24	ENSMUSG00000032172	olfactomedin 2
Prdm16	3.83884	-0.711462	0.0682087	0.631444	Intron (ENSMUST00000030902.12/70673, intron 2 of 16)	154498933	154499332	4	154476469	154528765	52297	2	70673	ENSMUST00000135064.1	29433	ENSMUSG00000039410	PR domain containing 16
Col1a1	3.14785	1.01452	0.0687266	0.63355	Promoter (1-2kb)	94934695	94935094	11	94936224	94953042	16819	1	12842	ENSMUST00000001547.7	-1130	ENSMUSG00000001506	collagen, type I, alpha 1
Trp73	0.355946	-2.27759	0.0689374	0.63355	Promoter (2-3kb)	154094288	154094687	4	154058989	154097167	38179	2	22062	ENSMUST00000097763.9	2480	ENSMUSG00000029026	transformation related protein 73
Rprm	0.718291	-2.04114	0.0690042	0.63355	Promoter (<=1kb)	54084864	54085263	2	54084093	54085552	1460	2	67874	ENSMUST00000100089.2	289	ENSMUSG00000075334	reprimo, TP53 dependent G2 arrest mediator candidate
Tbr1	5.90675	0.400079	0.069066	0.63355	Promoter (<=1kb)	61805811	61806210	2	61806262	61812531	6270	1	21375	ENSMUST00000102737.4	-52	ENSMUSG00000035033	T-box brain transcription factor 1
Fzr1	4.05988	-0.643356	0.0691433	0.63355	Promoter (<=1kb)	81378501	81378900	10	81366222	81378516	12295	2	56371	ENSMUST00000140901.7	0	ENSMUSG00000020235	fizzy and cell division cycle 20 related 1
Artn	4.95603	-0.449727	0.069145	0.63355	Promoter (2-3kb)	117926796	117927195	4	117928144	117929413	1270	2	11876	ENSMUST00000150612.1	2218	ENSMUSG00000028539	artemin
1700057H15Rik	1.93647	1.6301	0.0691798	0.63355	Distal Intergenic	124289255	124289654	4	124450235	124451285	1051	2	78460	ENSMUST00000156566.1	161631	NA	RIKEN cDNA 1700057H15 gene
Camta1	0.730312	-2.03706	0.0692607	0.63355	Exon (ENSMUST00000169423.8/100072, exon 7 of 25)	151163592	151163991	4	151086039	151139584	53546	2	100072	ENSMUST00000143434.1	-24008	ENSMUSG00000014592	calmodulin binding transcription activator 1
Ccdc184	4.80192	-0.471149	0.0694622	0.63378	Promoter (<=1kb)	98168066	98168465	15	98167158	98170134	2977	1	239650	ENSMUST00000031914.5	908	ENSMUSG00000029875	coiled-coil domain containing 184
A730082K24Rik	1.13604	2.34791	0.0696849	0.63378	Distal Intergenic	115217289	115217688	7	114951307	114982865	31559	1	101786	ENSMUST00000205795.1	265982	ENSMUSG00000108379	RIKEN cDNA A730082K24 gene
Kantr	0.073128	3.76621	0.0697172	0.63378	Exon (ENSMUST00000125102.1/ENSMUST00000125102.1, exon 3 of 3)	152314859	152315258	20	152298729	152327463	28735	2	72997	ENSMUST00000181635.7	12205	ENSMUSG00000087403	Kdm5c adjacent non-coding transcript
Iqch	0.96373	-1.8446	0.0698554	0.63378	Intron (ENSMUST00000126238.2/ENSMUST00000126238.2, intron 3 of 4)	63508739	63509138	9	63421835	63602417	180583	2	78250	ENSMUST00000171243.1	93279	ENSMUSG00000037801	IQ motif containing H
Dnah7a	2.91705	1.1006	0.0699233	0.63378	Distal Intergenic	53737898	53738297	1	53698030	53706784	8755	2	627872	ENSMUST00000189677.1	-31114	ENSMUSG00000096141	dynein, axonemal, heavy chain 7A
Mcoln2	2.69367	1.15652	0.0700026	0.63378	Promoter (<=1kb)	146150182	146150581	3	146150174	146195512	45339	1	68279	ENSMUST00000098524.4	8	ENSMUSG00000011008	mucolipin 2
Uap1l1	3.99532	0.727178	0.070108	0.63378	Promoter (<=1kb)	25364812	25365211	2	25363343	25364657	1315	2	227620	ENSMUST00000146226.1	-155	ENSMUSG00000026956	UDP-N-acteylglucosamine pyrophosphorylase 1-like 1
Otop2	1.61157	1.86181	0.0701107	0.63378	Promoter (2-3kb)	115309177	115309576	11	115307163	115332303	25141	1	237987	ENSMUST00000055490.8	2014	ENSMUSG00000050201	otopetrin 2
Stk32c	2.73108	-0.981191	0.0703104	0.634652	Intron (ENSMUST00000016125.11/57740, intron 2 of 11)	139140002	139140401	7	139103638	139188517	84880	2	57740	ENSMUST00000016125.11	48116	ENSMUSG00000015981	serine/threonine kinase 32C
Nkx6-1	0.0497283	3.74304	0.0705155	0.634664	Distal Intergenic	101431980	101432379	5	101658139	101664996	6858	2	18096	ENSMUST00000044125.10	232617	ENSMUSG00000035187	NK6 homeobox 1
Ppm1a	5.13014	0.452177	0.0705182	0.634664	Distal Intergenic	72831862	72832261	12	72786414	72790787	4374	1	19042	ENSMUST00000223221.1	45448	ENSMUSG00000021096	protein phosphatase 1A, magnesium dependent, alpha isoform
Midn	2.22633	-1.15541	0.0706937	0.634675	Promoter (<=1kb)	80149078	80149477	10	80149112	80150278	1167	1	59090	ENSMUST00000151202.1	0	ENSMUSG00000035621	midnolin
Slc12a5	6.19707	-0.385796	0.0710972	0.634675	Promoter (<=1kb)	164968458	164968857	2	164968281	164990275	21995	1	57138	ENSMUST00000202136.1	177	ENSMUSG00000017740	solute carrier family 12, member 5
Egr3	0.033813	3.72792	0.0712473	0.634675	Distal Intergenic	70069455	70069854	14	70077203	70079955	2753	1	13655	ENSMUST00000035908.2	-7349	ENSMUSG00000033730	early growth response 3
Opa1	0.033813	3.72792	0.0712473	0.634675	Distal Intergenic	29731556	29731955	16	29616625	29618707	2083	1	74143	ENSMUST00000160101.1	114931	ENSMUSG00000038084	OPA1, mitochondrial dynamin like GTPase
Lgr4	1.54863	-1.51255	0.0712587	0.634675	Intron (ENSMUST00000046548.13/107515, intron 1 of 17)	109955846	109956245	2	109975542	109997652	22111	1	107515	ENSMUST00000152584.1	-19297	ENSMUSG00000050199	leucine-rich repeat-containing G protein-coupled receptor 4
Abcc4	3.67583	0.824669	0.071261	0.634675	Promoter (<=1kb)	118705720	118706119	14	118482692	118706205	223514	2	239273	ENSMUST00000036554.13	86	ENSMUSG00000032849	ATP-binding cassette, sub-family C (CFTR/MRP), member 4
Sstr4	2.53386	1.21567	0.0714226	0.634675	Promoter (<=1kb)	148395069	148395468	2	148395344	148396767	1424	1	20608	ENSMUST00000109962.3	0	ENSMUSG00000037014	somatostatin receptor 4
Mitf	1.89476	1.61057	0.071514	0.634675	Promoter (<=1kb)	97806763	97807162	6	97807052	98018593	211542	1	17342	ENSMUST00000203884.2	0	ENSMUSG00000035158	melanogenesis associated transcription factor
Obscn	5.20815	0.441808	0.0715778	0.634675	Promoter (1-2kb)	59134589	59134988	11	58994256	59136375	142120	2	380698	ENSMUST00000047441.13	1387	ENSMUSG00000061462	obscurin, cytoskeletal calmodulin and titin-interacting RhoGEF
Nhsl1	2.36985	1.30575	0.0716033	0.634675	Promoter (2-3kb)	18466887	18467286	10	18469888	18473427	3540	1	215819	ENSMUST00000160547.1	-2602	ENSMUSG00000039835	NHS-like 1
B3galt6	1.37888	-1.57521	0.0716551	0.634675	Promoter (<=1kb)	155992412	155992811	4	155989466	155992649	3184	2	117592	ENSMUST00000052185.4	0	ENSMUSG00000050796	UDP-Gal:betaGal beta 1,3-galactosyltransferase, polypeptide 6
Galnt17	3.07408	-0.887333	0.0719359	0.636245	Promoter (<=1kb)	131305997	131306396	5	131085272	131306915	221644	2	212996	ENSMUST00000160807.1	519	ENSMUSG00000034040	polypeptide N-acetylgalactosaminyltransferase 17
Mxd1	2.36073	1.32546	0.0722845	0.638181	Promoter (<=1kb)	86669233	86669632	6	86647042	86669161	22120	2	17119	ENSMUST00000001184.9	-72	ENSMUSG00000001156	MAX dimerization protein 1
Galnt6	1.13912	2.32997	0.0723625	0.638181	Exon (ENSMUST00000229410.1/ENSMUST00000229410.1, exon 3 of 3)	100704329	100704728	15	100692864	100720477	27614	2	207839	ENSMUST00000161514.1	15749	ENSMUSG00000037280	polypeptide N-acetylgalactosaminyltransferase 6
Zfp503	8.27235	-0.338033	0.0725075	0.638544	Promoter (<=1kb)	21989133	21989532	14	21983959	21989601	5643	2	218820	ENSMUST00000043409.8	69	ENSMUSG00000039081	zinc finger protein 503
Rasgef1c	2.11995	-1.19062	0.0730643	0.640237	Promoter (<=1kb)	49901463	49901862	11	49901835	49980222	78388	1	74563	ENSMUST00000093141.11	0	ENSMUSG00000020374	RasGEF domain family, member 1C
Ets1	4.78416	0.508507	0.0733362	0.640237	Intron (ENSMUST00000183879.1/23871, intron 3 of 3)	32673925	32674324	9	32696022	32757820	61799	1	23871	ENSMUST00000034534.12	-21698	ENSMUSG00000032035	E26 avian leukemia oncogene 1, 5' domain
Nptx2	5.09155	-0.425016	0.0733569	0.640237	Promoter (<=1kb)	144546305	144546704	5	144545902	144557478	11577	1	53324	ENSMUST00000071782.7	403	ENSMUSG00000059991	neuronal pentraxin 2
Fto	2.69303	1.14698	0.0733787	0.640237	Intron (ENSMUST00000069718.14/26383, intron 1 of 8)	91369202	91369601	8	91390555	91409464	18910	1	26383	ENSMUST00000149913.1	-20954	ENSMUSG00000055932	fat mass and obesity associated
1700044C05Rik	2.83179	1.08116	0.0735392	0.640237	Distal Intergenic	118414273	118414672	14	118365878	118398170	32293	1	73306	ENSMUST00000186060.1	48395	ENSMUSG00000099911	RIKEN cDNA 1700044C05 gene
Frmpd1os	1.11077	2.32121	0.0735507	0.640237	Intron (ENSMUST00000134280.7/666060, intron 5 of 6)	45250776	45251175	4	45234723	45243990	9268	2	78508	ENSMUST00000134640.1	-6786	ENSMUSG00000086284	FERM and PDZ domain containing 1, opposite strand
Gm29683	3.65265	-0.7417	0.0737012	0.640237	Distal Intergenic	70120611	70121010	7	70178868	70337822	158955	2	624549	ENSMUST00000208511.1	216812	ENSMUSG00000109097	predicted gene, 29683
4921539E11Rik	0.0178093	3.71271	0.0737319	0.640237	Intron (ENSMUST00000030245.9/70941, intron 2 of 8)	103271276	103271675	4	103230445	103290863	60419	2	70941	ENSMUST00000030245.9	19188	ENSMUSG00000028520	RIKEN cDNA 4921539E11 gene
Spp2	1.90961	1.59914	0.0737535	0.640237	Distal Intergenic	88392564	88392963	1	88406961	88426438	19478	1	75396	ENSMUST00000027518.11	-13998	ENSMUSG00000026295	secreted phosphoprotein 2
Nfix	1.56831	1.85143	0.0738501	0.640237	Intron (ENSMUST00000109764.7/18032, intron 2 of 10)	84760583	84760982	8	84704712	84773396	68685	2	18032	ENSMUST00000109764.7	12414	ENSMUSG00000001911	nuclear factor I/X
Gli2	4.18918	-0.598691	0.0739825	0.640237	Promoter (1-2kb)	118980541	118980940	1	118868042	118982588	114547	2	14633	ENSMUST00000159678.2	1648	ENSMUSG00000048402	GLI-Kruppel family member GLI2
Mxd4	2.48439	-1.05753	0.0740064	0.640237	Promoter (<=1kb)	34187622	34188021	5	34173887	34187710	13824	2	17122	ENSMUST00000042701.12	0	ENSMUSG00000037235	Max dimerization protein 4
Vrtn	4.84167	0.494605	0.0742859	0.640237	Promoter (<=1kb)	84641316	84641715	12	84641019	84651455	10437	1	432677	ENSMUST00000166772.8	297	ENSMUSG00000071235	vertebrae development associated
Auts2	2.69084	-0.98393	0.0743513	0.640237	Promoter (<=1kb)	131616507	131616906	5	131437788	131616605	178818	2	319974	ENSMUST00000161804.7	0	ENSMUSG00000029673	autism susceptibility candidate 2
Phactr1	2.72375	-0.966448	0.0744343	0.640237	Promoter (<=1kb)	42709755	42710154	13	42709581	43138526	428946	1	218194	ENSMUST00000148891.7	174	ENSMUSG00000054728	phosphatase and actin regulator 1
AW011738	2.82958	1.07847	0.0745605	0.640237	Promoter (<=1kb)	156203411	156203810	4	156203304	156205151	1848	1	100382	ENSMUST00000105140.2	107	ENSMUSG00000078349	expressed sequence AW011738
Crhr2	6.18224	0.392592	0.0746606	0.640237	Promoter (<=1kb)	55117431	55117830	6	55104743	55117771	13029	2	12922	ENSMUST00000169777.1	0	ENSMUSG00000003476	corticotropin releasing hormone receptor 2
Mafb	7.64912	0.363601	0.0746685	0.640237	Promoter (4-5kb)	160361839	160362238	2	160363703	160367065	3363	2	16658	ENSMUST00000099126.4	4827	ENSMUSG00000074622	v-maf musculoaponeurotic fibrosarcoma oncogene family, protein B (avian)
Minar1	3.18439	0.971798	0.0746787	0.640237	Promoter (<=1kb)	89622302	89622701	9	89587216	89623125	35910	2	209743	ENSMUST00000044491.12	424	ENSMUSG00000039313	membrane integral NOTCH2 associated receptor 1
Psma1	2.70458	1.13353	0.0748367	0.640698	Downstream (2-3kb)	114312861	114313260	7	114264606	114276118	11513	2	26440	ENSMUST00000033008.9	-36743	ENSMUSG00000030751	proteasome subunit alpha 1
Cdhr3	2.65808	-0.987215	0.0750152	0.640885	Intron (ENSMUST00000140569.1/ENSMUST00000140569.1, intron 1 of 2)	33113873	33114272	12	33033796	33092875	59080	2	68764	ENSMUST00000095774.2	-20998	ENSMUSG00000035860	cadherin-related family member 3
Tmem121	2.13927	1.42522	0.0751145	0.640885	Promoter (<=1kb)	113185274	113185673	12	113185930	113189523	3594	1	69195	ENSMUST00000058491.7	-257	ENSMUSG00000049036	transmembrane protein 121
Nrxn3	1.81384	-1.32425	0.0752409	0.640885	Promoter (<=1kb)	89812065	89812464	12	89812408	90332928	520521	1	18191	ENSMUST00000238943.1	0	ENSMUSG00000066392	neurexin III
Fezf1	1.79303	-1.32902	0.0754903	0.640885	Distal Intergenic	23235623	23236022	6	23245044	23248362	3319	2	73191	ENSMUST00000031709.6	12340	ENSMUSG00000029697	Fez family zinc finger 1
Calcb	3.68428	0.814653	0.0755268	0.640885	Promoter (<=1kb)	114718612	114719011	7	114718643	114723365	4723	1	116903	ENSMUST00000032902.10	0	ENSMUSG00000030666	calcitonin-related polypeptide, beta
Gm12830	0	3.67428	0.0756616	0.640885	Distal Intergenic	114767597	114767996	4	114821722	114856166	34445	1	433746	ENSMUST00000137570.1	-53726	ENSMUSG00000055198	predicted gene 12830
Ada	0.372149	-2.22011	0.0757101	0.640885	Promoter (1-2kb)	163748699	163749098	2	163726584	163750239	23656	2	11486	ENSMUST00000017841.3	1141	ENSMUSG00000017697	adenosine deaminase
Tjp2	4.11388	0.679462	0.0757278	0.640885	Promoter (<=1kb)	24224530	24224929	19	24094523	24225026	130504	2	21873	ENSMUST00000099558.4	97	ENSMUSG00000024812	tight junction protein 2
Slc5a1	2.72171	1.13394	0.0757969	0.640885	Promoter (<=1kb)	33104220	33104619	5	33104219	33162870	58652	1	20537	ENSMUST00000011178.4	1	ENSMUSG00000011034	solute carrier family 5 (sodium/glucose cotransporter), member 1
Ggct	1.8938	1.57989	0.0759481	0.641046	Distal Intergenic	55009062	55009461	6	54982580	54992950	10371	2	110175	ENSMUST00000131475.1	-16112	ENSMUSG00000002797	gamma-glutamyl cyclotransferase
Gas8	3.66448	-0.740269	0.0760245	0.641046	Promoter (<=1kb)	123518590	123518989	8	123518834	123536650	17817	1	104346	ENSMUST00000093043.6	0	ENSMUSG00000040220	growth arrest specific 8
Vrk1	1.79761	-1.3264	0.0763536	0.642811	Distal Intergenic	106173781	106174180	12	106030717	106075409	44693	1	22367	ENSMUST00000220629.1	143064	ENSMUSG00000021115	vaccinia related kinase 1
4930542M03Rik	1.13978	2.29789	0.076443	0.642811	Distal Intergenic	45865793	45866192	17	45879850	45881452	1603	2	75154	ENSMUST00000233801.1	15260	ENSMUSG00000117085	RIKEN cDNA 4930542M03 gene
Pigz	5.35727	0.418577	0.0769386	0.643674	Promoter (1-2kb)	31935089	31935488	16	31933982	31942623	8642	1	239827	ENSMUST00000134928.1	1107	ENSMUSG00000045625	phosphatidylinositol glycan anchor biosynthesis, class Z
4930550C17Rik	5.47857	-0.388869	0.0771489	0.643674	Exon (ENSMUST00000181629.1/75245, exon 5 of 5)	56222075	56222474	13	56222224	56243940	21717	2	75245	ENSMUST00000181629.1	21466	ENSMUSG00000097361	RIKEN cDNA 4930550C17 gene
Vsx1	6.41328	0.38349	0.0771582	0.643674	Promoter (<=1kb)	150689002	150689401	2	150680702	150689360	8659	2	114889	ENSMUST00000046095.9	0	ENSMUSG00000033080	visual system homeobox 1
Nkx2-9	8.70221	0.322977	0.0771642	0.643674	Promoter (1-2kb)	56611554	56611953	12	56611389	56613284	1896	2	18094	ENSMUST00000072631.5	1331	ENSMUSG00000058669	NK2 homeobox 9
Myod1	3.69247	0.807086	0.0772365	0.643674	Exon (ENSMUST00000209655.1/ENSMUST00000209655.1, exon 1 of 2)	46348918	46349317	7	46376474	46379099	2626	1	17927	ENSMUST00000072514.2	-27157	ENSMUSG00000009471	myogenic differentiation 1
Zfp608	4.49229	0.565702	0.0772981	0.643674	Distal Intergenic	54758781	54759180	18	54892481	54895562	3082	2	269023	ENSMUST00000237009.1	136382	ENSMUSG00000052713	zinc finger protein 608
Myh14	2.50273	1.20708	0.0773383	0.643674	Exon (ENSMUST00000107899.9/71960, exon 11 of 40)	44638982	44639381	7	44629966	44632785	2820	2	71960	ENSMUST00000209024.1	-6197	ENSMUSG00000030739	myosin, heavy polypeptide 14
Gm29683	7.8695	-0.3457	0.0774945	0.643674	Intron (ENSMUST00000208511.1/624549, intron 1 of 3)	70331905	70332304	7	70178868	70337822	158955	2	624549	ENSMUST00000208511.1	5518	ENSMUSG00000109097	predicted gene, 29683
Wnk4	6.7616	0.379948	0.0776038	0.643674	Promoter (1-2kb)	101262391	101262790	11	101260655	101277274	16620	1	69847	ENSMUST00000147741.8	1736	ENSMUSG00000035112	WNK lysine deficient protein kinase 4
Ebf1	6.01157	-0.37622	0.0776264	0.643674	Intron (ENSMUST00000109268.1/13591, intron 6 of 15)	44665307	44665706	11	44621761	44643459	21699	1	13591	ENSMUST00000138452.1	43546	ENSMUSG00000057098	early B cell factor 1
Plekha6	2.66054	-0.977195	0.0778617	0.643674	Intron (ENSMUST00000212252.1/240753, intron 3 of 9)	133210019	133210418	1	133181321	133301219	119899	1	240753	ENSMUST00000187285.6	28698	ENSMUSG00000041757	pleckstrin homology domain containing, family A member 6
Exosc2	2.94503	-0.906597	0.0780341	0.643674	Promoter (<=1kb)	31670507	31670906	2	31670715	31681349	10635	1	227715	ENSMUST00000038474.13	0	ENSMUSG00000039356	exosome component 2
Prom2	5.56026	0.398552	0.0780844	0.643674	Promoter (<=1kb)	127541108	127541507	2	127526473	127541467	14995	2	192212	ENSMUST00000028855.13	0	ENSMUSG00000027376	prominin 2
Cdx4	0	3.65887	0.0781364	0.643674	Exon (ENSMUST00000033689.2/12592, exon 2 of 3)	103327825	103328224	20	103321398	103330592	9195	1	12592	ENSMUST00000033689.2	6427	ENSMUSG00000031326	caudal type homeobox 4
Castor2	0	3.65508	0.0781459	0.643674	Distal Intergenic	133495269	133495668	5	134099711	134144343	44633	1	80909	ENSMUST00000016088.8	-604043	ENSMUSG00000015944	cytosolic arginine sensor for mTORC1 subunit 2
Cxcl5	2.37376	-1.07279	0.078221	0.643674	Promoter (<=1kb)	90759401	90759800	5	90759378	90761624	2247	1	20311	ENSMUST00000031318.5	23	ENSMUSG00000029371	chemokine (C-X-C motif) ligand 5
Foxn2	1.57559	1.87651	0.0784817	0.644522	Intron (ENSMUST00000234514.1/ENSMUST00000234514.1, intron 1 of 1)	88324280	88324679	17	88440711	88490533	49823	1	14236	ENSMUST00000112238.8	-116032	ENSMUSG00000034998	forkhead box N2
Ostm1	2.50272	-1.02728	0.0785338	0.644522	Intron (ENSMUST00000105497.7/14628, intron 2 of 5)	42614763	42615162	10	42583838	42700492	116655	1	14628	ENSMUST00000144806.7	30925	ENSMUSG00000038280	osteopetrosis associated transmembrane protein 1
Bcl11b	1.56555	1.82583	0.0787347	0.64531	Intron (ENSMUST00000066060.10/58208, intron 2 of 3)	107978323	107978722	12	107915222	108003414	88193	2	58208	ENSMUST00000109887.7	24692	ENSMUSG00000048251	B cell leukemia/lymphoma 11B
Shank2	2.34831	-1.07154	0.0789271	0.645556	Promoter (<=1kb)	144175591	144175990	7	144175529	144424494	248966	1	210274	ENSMUST00000105900.8	62	ENSMUSG00000037541	SH3 and multiple ankyrin repeat domains 2
Mirlet7a-1	3.26938	-0.820549	0.079255	0.645556	Exon (ENSMUST00000181490.3/ENSMUST00000181490.3, exon 1 of 2)	48546453	48546852	13	48538179	48538272	94	2	387244	ENSMUST00000083487.3	-8181	ENSMUSG00000065421	microRNA let7a-1
Mir9-3hg	2.12262	1.40488	0.0793459	0.645556	Intron (ENSMUST00000206829.1/ENSMUST00000206829.1, intron 1 of 1)	79540746	79541145	7	79527850	79532044	4195	1	101694	ENSMUST00000182125.1	12896	ENSMUSG00000097023	Mir9-3 host gene
Cbwd1	3.07642	-0.869321	0.0794047	0.645556	Promoter (<=1kb)	24961574	24961973	19	24919916	24961601	41686	2	226043	ENSMUST00000025815.9	0	ENSMUSG00000024878	COBW domain containing 1
Acbd4	4.42457	-0.534361	0.0794066	0.645556	Promoter (<=1kb)	103101284	103101683	11	103101682	103112197	10516	1	67131	ENSMUST00000107040.9	0	ENSMUSG00000056938	acyl-Coenzyme A binding domain containing 4
Uchl1	2.54455	1.19224	0.0794234	0.645556	Promoter (<=1kb)	66675982	66676381	5	66676091	66687234	11144	1	22223	ENSMUST00000031131.10	0	ENSMUSG00000029223	ubiquitin carboxy-terminal hydrolase L1
Ptprm	4.2598	0.624619	0.0794999	0.645556	Promoter (<=1kb)	67353317	67353716	17	66666947	67354073	687127	2	19274	ENSMUST00000037974.9	357	ENSMUSG00000033278	protein tyrosine phosphatase, receptor type, M
Pdzd2	2.88011	-0.907033	0.0797004	0.646047	Promoter (<=1kb)	12739302	12739701	15	12443331	12739924	296594	2	68070	ENSMUST00000189469.6	223	ENSMUSG00000022197	PDZ domain containing 2
Grm1	3.81161	0.758379	0.0798138	0.646047	Promoter (<=1kb)	11081387	11081786	10	10688801	11080956	392156	2	14816	ENSMUST00000105560.1	-431	ENSMUSG00000019828	glutamate receptor, metabotropic 1
Ret	5.32489	0.41675	0.0798757	0.646047	Promoter (<=1kb)	118197143	118197542	6	118151745	118197133	45389	2	19713	ENSMUST00000032201.7	-10	ENSMUSG00000030110	ret proto-oncogene
Bcl6	5.24925	0.420747	0.0801166	0.647144	Intron (ENSMUST00000023151.5/12053, intron 1 of 9)	23980821	23981220	16	23965052	23988852	23801	2	12053	ENSMUST00000023151.5	7632	ENSMUSG00000022508	B cell leukemia/lymphoma 6
Nrbp2	5.00353	0.450789	0.0805926	0.648808	Promoter (<=1kb)	76090494	76090893	15	76089640	76090600	961	2	223649	ENSMUST00000226356.1	0	ENSMUSG00000075590	nuclear receptor binding protein 2
Fxyd5	1.8762	1.56067	0.0806648	0.648808	Promoter (<=1kb)	31042298	31042697	7	31032726	31042481	9756	2	18301	ENSMUST00000161684.7	0	ENSMUSG00000009687	FXYD domain-containing ion transport regulator 5
Mapk8ip2	2.26484	-1.0989	0.0808536	0.648808	Promoter (<=1kb)	89453472	89453871	15	89453913	89464468	10556	1	60597	ENSMUST00000023291.5	-42	ENSMUSG00000022619	mitogen-activated protein kinase 8 interacting protein 2
Mideas	2.88667	-0.91309	0.0808575	0.648808	Promoter (<=1kb)	84218240	84218639	12	84149176	84218881	69706	2	238317	ENSMUST00000046266.12	242	ENSMUSG00000042507	mitotic deacetylase associated SANT domain protein
Mknk2	3.53495	-0.754658	0.0811617	0.648808	Promoter (<=1kb)	80676337	80676736	10	80665327	80676293	10967	2	17347	ENSMUST00000200082.4	-44	ENSMUSG00000020190	MAP kinase-interacting serine/threonine kinase 2
Bend5	2.95907	1.01154	0.0811893	0.648808	Intron (ENSMUST00000106591.7/78933, intron 6 of 8)	111443743	111444142	4	111433319	111459927	26609	1	67621	ENSMUST00000123667.1	10424	ENSMUSG00000028545	BEN domain containing 5
Add1	2.54934	-1.00354	0.0812682	0.648808	Promoter (<=1kb)	34573459	34573858	5	34573664	34632308	58645	1	11518	ENSMUST00000114338.8	0	ENSMUSG00000029106	adducin 1 (alpha)
Celf5	1.6666	-1.37949	0.0812836	0.648808	Promoter (<=1kb)	81481382	81481781	10	81467759	81482672	14914	2	319586	ENSMUST00000128494.1	891	ENSMUSG00000034818	CUGBP, Elav-like family member 5
Rspo2	4.49953	0.554752	0.0813954	0.648808	Promoter (<=1kb)	43169970	43170369	15	43020797	43170818	150022	2	239405	ENSMUST00000063492.7	449	ENSMUSG00000051920	R-spondin 2
Galr3	5.56656	-0.38137	0.0814753	0.648808	Promoter (<=1kb)	79042795	79043194	15	79041885	79043558	1674	1	14429	ENSMUST00000058004.3	910	ENSMUSG00000114755	galanin receptor 3
Elavl2	2.33375	-1.09085	0.0814837	0.648808	Promoter (<=1kb)	91376403	91376802	4	91250763	91376463	125701	2	15569	ENSMUST00000107120.7	0	ENSMUSG00000008489	ELAV like RNA binding protein 1
Plcd1	4.77993	0.493808	0.0816077	0.648956	Promoter (<=1kb)	119092693	119093092	9	119071527	119093502	21976	2	18799	ENSMUST00000010804.3	410	ENSMUSG00000010660	phospholipase C, delta 1
Gm14207	8.31195	0.331144	0.081906	0.650486	Promoter (<=1kb)	119324712	119325111	2	119321187	119325543	4357	2	100043609	ENSMUST00000147929.7	432	ENSMUSG00000074912	predicted gene 14207
Vinac1	2.86292	-0.908424	0.0824566	0.650637	Exon (ENSMUST00000145798.3/668894, exon 3 of 7)	129039017	129039416	2	129025073	129048172	23100	2	668894	ENSMUST00000145798.3	8756	ENSMUSG00000079051	vinculin/alpha-catenin family member 1
Sim2	4.02152	0.687913	0.0825381	0.650637	Promoter (<=1kb)	94124569	94124968	16	94125181	94125715	535	1	20465	ENSMUST00000231295.1	-213	ENSMUSG00000062713	single-minded family bHLH transcription factor 2
Calcoco1	3.34818	-0.78892	0.0826339	0.650637	Distal Intergenic	102744166	102744565	15	102706777	102722178	15402	2	67488	ENSMUST00000023818.10	-21988	ENSMUSG00000023055	calcium binding and coiled coil domain 1
Sgta	2.55968	-1.00068	0.0827822	0.650637	Promoter (<=1kb)	81060164	81060563	10	81044075	81060178	16104	2	52551	ENSMUST00000005067.5	0	ENSMUSG00000004937	small glutamine-rich tetratricopeptide repeat (TPR)-containing, alpha
Rab40c	3.82323	-0.67671	0.0827976	0.650637	Promoter (<=1kb)	25919834	25920233	17	25883639	25919727	36089	2	224624	ENSMUST00000167018.7	-107	ENSMUSG00000025730	Rab40C, member RAS oncogene family
Grm4	0.951608	-1.76915	0.0828792	0.650637	Exon (ENSMUST00000118489.7/268934, exon 9 of 9)	27422549	27422948	17	27451629	27473067	21439	2	268934	ENSMUST00000147865.1	50119	ENSMUSG00000063239	glutamate receptor, metabotropic 4
AU015836	0	3.60476	0.0830086	0.650637	Distal Intergenic	94010618	94011017	20	93969796	93975071	5276	1	385493	ENSMUST00000120624.1	40822	ENSMUSG00000081044	expressed sequence AU015836
Eif2s3x	0	3.60476	0.0830086	0.650637	Distal Intergenic	94221638	94222037	20	94202880	94212862	9983	2	26905	ENSMUST00000127963.1	-8776	ENSMUSG00000035150	eukaryotic translation initiation factor 2, subunit 3, structural gene X-linked
Dusp26	1.58036	1.80514	0.0830198	0.650637	Distal Intergenic	30926772	30927171	8	31089471	31097047	7577	1	66959	ENSMUST00000036631.13	-162300	ENSMUSG00000039661	dual specificity phosphatase 26 (putative)
Tex29	0	-3.26806	0.0831483	0.650637	Distal Intergenic	12004869	12005268	8	11842061	11855757	13697	1	75528	ENSMUST00000132536.1	162808	ENSMUSG00000031512	testis expressed 29
E130101E03Rik	0	-3.26806	0.0831483	0.650637	Distal Intergenic	24881593	24881992	9	24974208	24998420	24213	1	102631612	ENSMUST00000214469.1	-92216	ENSMUSG00000111866	RIKEN cDNA E130101E03 gene
Casz1	1.5477	1.80574	0.0833564	0.650637	Distal Intergenic	148772194	148772593	4	148804429	148945129	140701	1	69743	ENSMUST00000094464.9	-31836	ENSMUSG00000028977	castor zinc finger 1
Tenm4	1.31149	-1.55613	0.0833844	0.650637	Intron (ENSMUST00000107162.7/23966, intron 7 of 32)	96669710	96670109	7	96644172	96732280	88109	1	23966	ENSMUST00000131541.1	25538	ENSMUSG00000048078	teneurin transmembrane protein 4
Pawr	2.67845	1.11434	0.0834068	0.650637	Promoter (<=1kb)	108332530	108332929	10	108332817	108413754	80938	1	114774	ENSMUST00000218332.1	0	ENSMUSG00000035873	PRKC, apoptosis, WT1, regulator
Gpc3	4.51345	-0.504444	0.0835949	0.651078	Promoter (<=1kb)	52613743	52614142	20	52272426	52613921	341496	2	14734	ENSMUST00000069360.13	0	ENSMUSG00000055653	glypican 3
Pygo1	1.62226	-1.37265	0.0836752	0.651078	Promoter (<=1kb)	72925254	72925653	9	72925645	72952181	26537	1	72135	ENSMUST00000038489.5	0	ENSMUSG00000034910	pygopus 1
Gpr88	3.9324	-0.642521	0.0841316	0.653802	Promoter (<=1kb)	116251724	116252123	3	116252563	116253089	527	2	64378	ENSMUST00000197759.1	966	ENSMUSG00000068696	G-protein coupled receptor 88
Hmga2	5.57989	-0.38085	0.0848984	0.658182	Promoter (<=1kb)	120476204	120476603	10	120361275	120476469	115195	2	15364	ENSMUST00000072777.13	0	ENSMUSG00000056758	high mobility group AT-hook 2
Frat1	1.073	2.28527	0.0850573	0.658182	Promoter (<=1kb)	41830840	41831239	19	41829970	41832583	2614	1	14296	ENSMUST00000087155.4	870	ENSMUSG00000067199	frequently rearranged in advanced T cell lymphomas
Etv5	5.19704	0.422456	0.085196	0.658182	Promoter (1-2kb)	22434584	22434983	16	22381316	22436514	55199	2	104156	ENSMUST00000168774.7	1531	ENSMUSG00000013089	ets variant 5
Rnf5	4.0088	-0.623176	0.0853052	0.658182	Promoter (<=1kb)	34603681	34604080	17	34601091	34603690	2600	2	54197	ENSMUST00000015622.7	0	ENSMUSG00000015478	ring finger protein 5
Gm10578	1.48988	-1.43924	0.0853056	0.658182	Exon (ENSMUST00000169486.8/13593, exon 16 of 16)	137193874	137194273	7	137234683	137240366	5684	1	100038555	ENSMUST00000209747.1	-40410	ENSMUSG00000109722	predicted gene 10578
Slc4a11	4.2622	0.615018	0.0853378	0.658182	Promoter (<=1kb)	130696973	130697372	2	130686577	130697469	10893	2	269356	ENSMUST00000134647.7	97	ENSMUSG00000074796	solute carrier family 4, sodium bicarbonate transporter-like, member 11
Abcc8	1.52971	1.80874	0.0856022	0.659395	Promoter (3-4kb)	46141744	46142143	7	46126603	46137968	11366	2	20927	ENSMUST00000210110.1	-3776	ENSMUSG00000040136	ATP-binding cassette, sub-family C (CFTR/MRP), member 8
Bspry	2.96353	-0.879165	0.0857829	0.659809	Promoter (<=1kb)	62479994	62480393	4	62480053	62497298	17246	1	192120	ENSMUST00000030088.11	0	ENSMUSG00000028392	B-box and SPRY domain containing
Dpf1	1.5295	1.81058	0.0858706	0.659809	Promoter (<=1kb)	29304220	29304619	7	29303976	29317588	13613	1	29861	ENSMUST00000049977.12	244	ENSMUSG00000030584	D4, zinc and double PHD fingers family 1
Myo6	1.64719	-1.35647	0.0860618	0.659991	Intron (ENSMUST00000035889.14/17920, intron 20 of 32)	80277147	80277546	9	80285414	80286508	1095	1	17920	ENSMUST00000156199.1	-7868	ENSMUSG00000033577	myosin VI
Cacna1a	2.10022	1.37968	0.0861091	0.659991	Promoter (<=1kb)	84600684	84601083	8	84600494	84640246	39753	1	12286	ENSMUST00000238337.1	190	ENSMUSG00000034656	calcium channel, voltage-dependent, P/Q type, alpha 1A subunit
Slit3	2.10411	1.37986	0.0862371	0.660149	Intron (ENSMUST00000069837.3/20564, intron 4 of 35)	35454124	35454523	11	35544685	35612636	67952	1	20564	ENSMUST00000124438.1	-90162	ENSMUSG00000056427	slit guidance ligand 3
Nrxn2	4.89409	-0.430431	0.0870706	0.6657	Promoter (<=1kb)	6428514	6428913	19	6428646	6464075	35430	1	18190	ENSMUST00000155158.2	0	ENSMUSG00000033768	neurexin II
Vtn	0	-2.58558	0.0875092	0.668222	Promoter (<=1kb)	78498915	78499314	11	78499091	78500585	1495	1	22370	ENSMUST00000128479.1	0	ENSMUSG00000017344	vitronectin
Galnt3	2.92531	0.997357	0.0876689	0.668611	Promoter (<=1kb)	66124653	66125052	2	66082766	66124994	42229	2	14425	ENSMUST00000028378.3	0	ENSMUSG00000026994	polypeptide N-acetylgalactosaminyltransferase 3
Lrmda	1.6364	-1.36106	0.0878062	0.668828	Intron (ENSMUST00000075639.10/76633, intron 2 of 6)	22354905	22355304	14	22310165	22584439	274275	1	76633	ENSMUST00000159107.1	44740	ENSMUSG00000063458	leucine rich melanocyte differentiation associated
Oxct2a	4.34173	0.584704	0.0880033	0.669501	Promoter (<=1kb)	123323549	123323948	4	123321875	123323634	1760	2	64059	ENSMUST00000102640.1	0	ENSMUSG00000076436	3-oxoacid CoA transferase 2A
Srd5a2	5.28885	0.405966	0.0881126	0.669503	Promoter (<=1kb)	74047477	74047876	17	74016955	74047916	30962	2	94224	ENSMUST00000043458.8	40	ENSMUSG00000038541	steroid 5 alpha-reductase 2
Crmp1	4.8821	-0.430576	0.0887954	0.671055	Promoter (<=1kb)	37242246	37242645	5	37242734	37278163	35430	1	12933	ENSMUST00000201834.3	-89	ENSMUSG00000029121	collapsin response mediator protein 1
Prmt8	6.63401	-0.361545	0.088913	0.671055	Promoter (1-2kb)	127767883	127768282	6	127689011	127769472	80462	2	381813	ENSMUST00000032500.8	1190	ENSMUSG00000030350	protein arginine N-methyltransferase 8
Zfx	0	3.55043	0.0889375	0.671055	Intron (ENSMUST00000088102.11/22764, intron 2 of 8)	94108251	94108650	20	94074632	94122900	48269	2	22764	ENSMUST00000113926.7	14250	ENSMUSG00000079509	zinc finger protein X-linked
Ripply2	2.74546	-0.915813	0.0889385	0.671055	Promoter (<=1kb)	87015697	87016096	9	87015636	87019916	4281	1	382089	ENSMUST00000188187.1	61	ENSMUSG00000047897	ripply transcriptional repressor 2
Nfib	3.14069	0.926482	0.0889761	0.671055	Promoter (<=1kb)	82504584	82504983	4	82290173	82505308	215136	2	18028	ENSMUST00000050872.14	325	ENSMUSG00000008575	nuclear factor I/B
Galnt13	2.40955	-1.02167	0.0890036	0.671055	Promoter (<=1kb)	54437400	54437799	2	54436491	54733133	296643	1	271786	ENSMUST00000136642.1	909	ENSMUSG00000060988	polypeptide N-acetylgalactosaminyltransferase 13
Eva1b	5.84201	-0.365049	0.0890982	0.671055	Promoter (<=1kb)	126148880	126149279	4	126148532	126149865	1334	1	230752	ENSMUST00000106150.2	348	ENSMUSG00000050212	eva-1 homolog B (C. elegans)
Sytl2	2.81398	1.0405	0.0891901	0.671055	Promoter (<=1kb)	90302632	90303031	7	90302252	90375438	73187	1	83671	ENSMUST00000207578.1	380	ENSMUSG00000030616	synaptotagmin-like 2
Slc24a4	5.34711	0.397468	0.089495	0.671263	Promoter (<=1kb)	102129138	102129537	12	102129174	102266749	137576	1	238384	ENSMUST00000079020.11	0	ENSMUSG00000041771	solute carrier family 24 (sodium/potassium/calcium exchanger), member 4
C230014O12Rik	1.53344	-1.42196	0.0895027	0.671263	Distal Intergenic	34124521	34124920	2	34018289	34107729	89441	2	329387	ENSMUST00000134921.1	-16792	ENSMUSG00000087461	RIKEN cDNA C230014O12 gene
Mir1932	3.872	0.71969	0.0895454	0.671263	Promoter (<=1kb)	119391209	119391608	11	119390472	119390561	90	1	100316690	ENSMUST00000157390.1	737	ENSMUSG00000088015	microRNA 1932
Serpine2	1.84674	1.52664	0.0899305	0.672883	Distal Intergenic	80030405	80030804	1	79803035	79861180	58146	2	20720	ENSMUST00000190724.1	-169225	ENSMUSG00000026249	serine (or cysteine) peptidase inhibitor, clade E, member 2
4933402J07Rik	5.89902	0.371514	0.0899805	0.672883	Downstream (1-2kb)	87660051	87660450	8	87563853	87589424	25572	1	330820	ENSMUST00000093342.5	96198	ENSMUSG00000069971	RIKEN cDNA 4933402J07 gene
Bex3	2.50583	1.15392	0.0901093	0.67294	Exon (ENSMUST00000083785.1/ENSMUST00000083785.1, exon 1 of 1)	136277390	136277789	20	136270775	136271920	1146	1	12070	ENSMUST00000113113.1	6615	ENSMUSG00000046432	brain expressed X-linked 3
Tagln2	4.39044	0.573228	0.090207	0.67294	Promoter (<=1kb)	172500472	172500871	1	172500245	172505852	5608	1	21346	ENSMUST00000192460.1	227	ENSMUSG00000026547	transgelin 2
Faah	3.16164	0.91402	0.0904589	0.673471	Promoter (<=1kb)	116017398	116017797	4	115967145	116017675	50531	2	14073	ENSMUST00000125761.7	0	ENSMUSG00000034171	fatty acid amide hydrolase
Bend6	2.70356	1.09249	0.0904973	0.673471	Promoter (<=1kb)	33907302	33907701	1	33852052	33907768	55717	2	320705	ENSMUST00000115161.7	67	ENSMUSG00000042182	BEN domain containing 6
AU040320	3.23339	-0.802573	0.0906809	0.674021	Promoter (<=1kb)	126753347	126753746	4	126753544	126791894	38351	1	100317	ENSMUST00000148935.7	0	ENSMUSG00000028830	expressed sequence AU040320
Bend4	3.71733	0.75482	0.0916749	0.680586	Promoter (<=1kb)	67426304	67426703	5	67392148	67427330	35183	2	666938	ENSMUST00000201705.3	627	ENSMUSG00000092060	BEN domain containing 4
Hif1an	4.77329	-0.451352	0.0919862	0.682021	Distal Intergenic	44582670	44583069	19	44562850	44576274	13425	1	319594	ENSMUST00000040455.4	19820	ENSMUSG00000036450	hypoxia-inducible factor 1, alpha subunit inhibitor
Mbp	2.1211	1.35527	0.0921392	0.682021	Promoter (<=1kb)	82475462	82475861	18	82475370	82584217	108848	1	17196	ENSMUST00000143506.7	92	ENSMUSG00000041607	myelin basic protein
Rnft2	1.12931	-1.63757	0.092201	0.682021	Exon (ENSMUST00000117177.7/269695, exon 12 of 12)	118191976	118192375	5	118194054	118201232	7179	2	269695	ENSMUST00000132831.1	8857	ENSMUSG00000032850	ring finger protein, transmembrane 2
Bcl11a	1.13355	-1.62654	0.0928043	0.685659	Intron (ENSMUST00000068360.1/ENSMUST00000068360.1, intron 1 of 2)	24060832	24061231	11	24078056	24173194	95139	1	14025	ENSMUST00000000881.12	-16825	ENSMUSG00000000861	B cell CLL/lymphoma 11A (zinc finger protein)
Erbb2	2.77953	1.0249	0.0930045	0.68614	Promoter (<=1kb)	98412747	98413146	11	98412493	98437077	24585	1	13866	ENSMUST00000136032.1	254	ENSMUSG00000062312	erb-b2 receptor tyrosine kinase 2
Emid1	2.44764	-1.00965	0.0930926	0.68614	Promoter (<=1kb)	5151779	5152178	11	5131975	5152237	20263	2	140703	ENSMUST00000156492.1	59	ENSMUSG00000034164	EMI domain containing 1
Leng9	4.13601	0.628921	0.0938739	0.689453	Promoter (<=1kb)	4151228	4151627	7	4147915	4150374	2460	2	243813	ENSMUST00000058358.7	-854	ENSMUSG00000043432	leukocyte receptor cluster (LRC) member 9
Mixl1	5.71121	0.371512	0.0938831	0.689453	Promoter (<=1kb)	180696846	180697245	1	180693043	180697034	3992	2	27217	ENSMUST00000027778.7	0	ENSMUSG00000026497	Mix1 homeobox-like 1 (Xenopus laevis)
Gm14858	0	3.56246	0.0941712	0.689453	Intron (ENSMUST00000144761.7/434825, intron 3 of 3)	102307821	102308220	20	102252651	102257689	5039	1	434825	ENSMUST00000138614.1	55170	ENSMUSG00000085568	predicted gene 14858
Apba1	2.66469	-0.932288	0.0943274	0.689453	Exon (ENSMUST00000025830.8/319924, exon 2 of 13)	23892949	23893348	19	23904457	23947376	42920	1	319924	ENSMUST00000237688.1	-11109	ENSMUSG00000024897	amyloid beta (A4) precursor protein binding, family A, member 1
Gpr25	3.99752	-0.60854	0.0945154	0.689453	Promoter (<=1kb)	136260283	136260682	1	136259797	136260873	1077	2	383563	ENSMUST00000086395.6	191	ENSMUSG00000052759	G protein-coupled receptor 25
Srrm3	6.65218	-0.356011	0.0947056	0.689453	Promoter (1-2kb)	135868617	135869016	5	135866617	135868209	1593	1	58212	ENSMUST00000150566.1	2000	ENSMUSG00000039860	serine/arginine repetitive matrix 3
4930563F08Rik	1.99454	-1.16293	0.0947318	0.689453	Intron (ENSMUST00000161226.8/319974, intron 4 of 18)	131852187	131852586	5	131880269	131883768	3500	1	75369	ENSMUST00000198640.1	-27683	ENSMUSG00000105773	RIKEN cDNA 4930563F08 gene
Eci2	0	3.54067	0.0948463	0.689453	Distal Intergenic	35038671	35039070	13	34986106	35027094	40989	2	23986	ENSMUST00000163280.7	-11577	ENSMUSG00000021417	enoyl-Coenzyme A delta isomerase 2
Spg11	0	3.54067	0.0948463	0.689453	Intron (ENSMUST00000036450.7/214585, intron 21 of 39)	122079310	122079709	2	122093540	122118296	24757	2	214585	ENSMUST00000133145.7	38587	ENSMUSG00000033396	SPG11, spatacsin vesicle trafficking associated
Rbm19	0	3.54067	0.0948463	0.689453	Distal Intergenic	120090973	120091372	5	120116465	120198981	82517	1	74111	ENSMUST00000031590.11	-25093	ENSMUSG00000029594	RNA binding motif protein 19
Sh3bp1	3.06168	0.939857	0.09485	0.689453	Promoter (<=1kb)	78900098	78900497	15	78900428	78902926	2499	1	20401	ENSMUST00000148893.1	0	ENSMUSG00000022436	SH3-domain binding protein 1
Socs2	3.50431	-0.728444	0.0948881	0.689453	Intron (ENSMUST00000139210.7/ENSMUST00000139210.7, intron 1 of 4)	95398625	95399024	10	95412420	95414827	2408	2	216233	ENSMUST00000134918.1	15803	ENSMUSG00000020027	suppressor of cytokine signaling 2
Smyd3	2.46684	1.14417	0.0951159	0.690292	Exon (ENSMUST00000161017.7/269152, exon 12 of 15)	178917628	178918027	1	178957250	178989345	32096	2	69726	ENSMUST00000129393.1	71318	ENSMUSG00000055067	SET and MYND domain containing 3
Ism2	4.00627	0.677319	0.0955147	0.692246	Promoter (<=1kb)	87300022	87300421	12	87278638	87299705	21068	2	217738	ENSMUST00000125733.7	-317	ENSMUSG00000050671	isthmin 2
Myh3	2.11053	1.34259	0.0956603	0.692246	Intron (ENSMUST00000108689.7/17883, intron 8 of 40)	67084255	67084654	11	67078300	67102291	23992	1	17883	ENSMUST00000165221.1	5955	ENSMUSG00000020908	myosin, heavy polypeptide 3, skeletal muscle, embryonic
Syk	5.3255	-0.377778	0.0957229	0.692246	Promoter (<=1kb)	52582791	52583190	13	52583173	52648792	65620	1	20963	ENSMUST00000120135.7	0	ENSMUSG00000021457	spleen tyrosine kinase
Recql5	1.80744	1.51288	0.0959993	0.69301	Exon (ENSMUST00000093911.10/ENSMUST00000093911.10, exon 36 of 64)	115882919	115883318	11	115892595	115895136	2542	2	170472	ENSMUST00000136774.6	11818	ENSMUSG00000020752	RecQ protein-like 5
Elp5	2.28613	1.22926	0.0962689	0.69301	Promoter (<=1kb)	69980503	69980902	11	69980035	69980696	662	2	54351	ENSMUST00000143175.1	0	ENSMUSG00000018565	elongator acetyltransferase complex subunit 5
Kcnb1	1.82341	1.5114	0.0963468	0.69301	Promoter (<=1kb)	167188753	167189152	2	167095969	167188818	92850	2	16500	ENSMUST00000207917.1	0	ENSMUSG00000050556	potassium voltage gated channel, Shab-related subfamily, member 1
2310057J18Rik	0	3.5189	0.096505	0.69301	Intron (ENSMUST00000056097.10/210757, intron 4 of 5)	28838870	28839269	10	28972366	28974189	1824	2	67719	ENSMUST00000141350.1	134920	ENSMUSG00000015519	RIKEN cDNA 2310057J18 gene
B4galnt2	0	3.5189	0.096505	0.69301	Distal Intergenic	95923762	95924161	11	95865943	95914891	48949	2	14422	ENSMUST00000038343.6	-8871	ENSMUSG00000013418	beta-1,4-N-acetyl-galactosaminyl transferase 2
Tcf7l2	0	3.5189	0.096505	0.69301	Distal Intergenic	55702237	55702636	19	55741820	55933229	191410	1	21416	ENSMUST00000111662.10	-39184	ENSMUSG00000024985	transcription factor 7 like 2, T cell specific, HMG box
Ankrd34b	4.32008	-0.525432	0.0966972	0.69304	Promoter (<=1kb)	92426673	92427072	13	92426658	92440930	14273	1	218440	ENSMUST00000168871.1	15	ENSMUSG00000045034	ankyrin repeat domain 34B
Bub3	0.328326	-2.19234	0.0969775	0.69304	Intron (ENSMUST00000124096.7/14183, intron 2 of 6)	131672328	131672727	7	131560710	131571164	10455	1	12237	ENSMUST00000207442.1	111618	ENSMUSG00000066979	BUB3 mitotic checkpoint protein
Stambp	1.15228	-1.60422	0.0970072	0.69304	Intron (ENSMUST00000205532.1/100861870, intron 5 of 7)	83582023	83582422	6	83543224	83572729	29506	2	70527	ENSMUST00000068054.8	-9294	ENSMUSG00000006906	STAM binding protein
Prcc	1.99831	-1.15107	0.0972242	0.69304	Promoter (<=1kb)	87885398	87885797	3	87858903	87885608	26706	2	94315	ENSMUST00000005015.9	0	ENSMUSG00000004895	papillary renal cell carcinoma (translocation-associated)
Ltbp3	4.60844	0.501015	0.0974122	0.69304	Promoter (<=1kb)	5751039	5751438	19	5750651	5751245	595	1	16998	ENSMUST00000237128.1	388	ENSMUSG00000024940	latent transforming growth factor beta binding protein 3
Zbtb43	0.888309	-1.75511	0.0975154	0.69304	Distal Intergenic	33487151	33487550	2	33454888	33468559	13672	2	71834	ENSMUST00000126442.1	-18592	ENSMUSG00000026788	zinc finger and BTB domain containing 43
Ptch1	2.79152	-0.883049	0.097613	0.69304	Promoter (<=1kb)	63572633	63573032	13	63508329	63573460	65132	2	19206	ENSMUST00000194663.5	428	ENSMUSG00000021466	patched 1
Etv2	6.37363	0.35859	0.097654	0.69304	Promoter (1-2kb)	30634381	30634780	7	30633616	30635852	2237	2	14008	ENSMUST00000108147.2	1072	ENSMUSG00000006311	ets variant 2
4933400A11Rik	1.05006	2.20231	0.0977859	0.69304	Intron (ENSMUST00000112107.7/17318, intron 1 of 9)	169774136	169774535	20	169776425	169779557	3133	2	66747	ENSMUST00000112102.1	5022	ENSMUSG00000055357	capping protein (actin filament) muscle Z-line, alpha 1 pseudogene
Dok1	3.79151	0.724212	0.0979216	0.69304	Promoter (<=1kb)	83032666	83033065	6	83031851	83032561	711	2	13448	ENSMUST00000204900.1	-105	ENSMUSG00000068335	docking protein 1
Itga11	5.82744	0.365554	0.098153	0.69304	Promoter (<=1kb)	62678091	62678490	9	62677860	62777111	99252	1	319480	ENSMUST00000159012.1	231	ENSMUSG00000032243	integrin alpha 11
Myo1c	4.05296	0.643426	0.098204	0.69304	Promoter (1-2kb)	75653516	75653915	11	75652076	75673910	21835	1	17913	ENSMUST00000102504.9	1440	ENSMUSG00000017774	myosin IC
4933422A05Rik	2.05667	1.34502	0.0982289	0.69304	Distal Intergenic	35331209	35331608	9	35281105	35285423	4319	1	71133	ENSMUST00000213706.1	50104	ENSMUSG00000111746	RIKEN cDNA 4933422A05 gene
Ttc9	1.72022	-1.2671	0.0983899	0.69304	Promoter (<=1kb)	81631100	81631499	12	81631249	81667557	36309	1	69480	ENSMUST00000218362.1	0	ENSMUSG00000042734	tetratricopeptide repeat domain 9
Prkcsh	3.06811	-0.823025	0.0986322	0.69304	Promoter (<=1kb)	22002613	22003012	9	22002806	22014222	11417	1	19089	ENSMUST00000216344.1	0	ENSMUSG00000003402	protein kinase C substrate 80K-H
1700008O03Rik	0	3.49714	0.098664	0.69304	Promoter (<=1kb)	44386367	44386766	7	44362682	44385684	23003	2	69349	ENSMUST00000150034.1	-683	ENSMUSG00000008028	RIKEN cDNA 1700008O03 gene
Htra1	6.72884	0.355573	0.0987	0.69304	Promoter (<=1kb)	130936332	130936731	7	130936203	130985660	49458	1	56213	ENSMUST00000006367.7	129	ENSMUSG00000006205	HtrA serine peptidase 1
Gmds	2.39179	-0.994562	0.0987737	0.69304	Promoter (<=1kb)	32338432	32338831	13	31819579	32338740	519162	2	218138	ENSMUST00000041859.8	0	ENSMUSG00000038372	GDP-mannose 4, 6-dehydratase
Gpr176	5.80976	-0.353098	0.0988554	0.69304	Promoter (<=1kb)	118372937	118373336	2	118277110	118373419	96310	2	381413	ENSMUST00000039160.2	83	ENSMUSG00000040133	G protein-coupled receptor 176
Kif19a	2.18781	-1.07403	0.0988566	0.69304	Promoter (2-3kb)	114790132	114790531	11	114787945	114789332	1388	1	286942	ENSMUST00000134165.1	2187	ENSMUSG00000010021	kinesin family member 19A
Adamts8	3.39642	0.820148	0.0990393	0.69304	Promoter (<=1kb)	30944076	30944475	9	30943458	30963838	20381	1	30806	ENSMUST00000163037.1	618	ENSMUSG00000031994	a disintegrin-like and metallopeptidase (reprolysin type) with thrombospondin type 1 motif, 8
Tmem163	0	3.5146	0.0994538	0.69304	Promoter (2-3kb)	127502526	127502925	1	127491361	127500344	8984	2	72160	ENSMUST00000160111.7	-2182	ENSMUSG00000026347	transmembrane protein 163
Igdcc3	1.48906	1.74127	0.099522	0.69304	Exon (ENSMUST00000035499.4/56741, exon 7 of 20)	65123412	65123811	9	65141189	65185872	44684	1	19289	ENSMUST00000034961.5	-17378	ENSMUSG00000032394	immunoglobulin superfamily, DCC subclass, member 3
Hlcs	2.91653	0.967305	0.0996244	0.69304	Intron (ENSMUST00000228910.1/110948, intron 2 of 6)	94155319	94155718	16	94133003	94175000	41998	2	110948	ENSMUST00000227618.1	19282	ENSMUSG00000040820	holocarboxylase synthetase (biotin- [propriony-Coenzyme A-carboxylase (ATP-hydrolysing)] ligase)
Lrrc38	5.59658	0.369813	0.0996987	0.69304	Promoter (<=1kb)	143350142	143350541	4	143349757	143371032	21276	1	242735	ENSMUST00000052458.2	385	ENSMUSG00000028584	leucine rich repeat containing 38
S100a1	2.9051	0.960275	0.0998059	0.69304	Promoter (<=1kb)	90514172	90514571	3	90511034	90514392	3359	2	20193	ENSMUST00000060738.8	0	ENSMUSG00000044080	S100 calcium binding protein A1
Tnfrsf18	5.10085	0.410871	0.0998203	0.69304	Exon (ENSMUST00000051509.14/330010, exon 15 of 15)	156035028	156035427	4	156028368	156028895	528	1	21936	ENSMUST00000125100.1	6660	ENSMUSG00000041954	tumor necrosis factor receptor superfamily, member 18
Tmcc3	2.23921	-1.05931	0.0999292	0.69304	Promoter (<=1kb)	94312269	94312668	10	94312137	94375595	63459	1	319880	ENSMUST00000139230.1	132	ENSMUSG00000020023	transmembrane and coiled coil domains 3
Nrg3	2.33685	-1.02611	0.0999688	0.69304	Promoter (<=1kb)	39472360	39472759	14	39009187	39472666	463480	2	18183	ENSMUST00000176122.1	0	ENSMUSG00000041014	neuregulin 3
Pkp3	2.06256	1.33658	0.1001	0.69304	Promoter (<=1kb)	141089782	141090181	7	141089411	141089916	506	1	56460	ENSMUST00000161142.1	371	ENSMUSG00000054065	plakophilin 3
Mreg	0	3.47958	0.100196	0.69304	Distal Intergenic	72234168	72234567	1	72159442	72212307	52866	2	381269	ENSMUST00000048860.8	-21861	ENSMUSG00000039395	melanoregulin
4931428F04Rik	3.7155	-0.673015	0.100197	0.69304	Promoter (<=1kb)	105289132	105289531	8	105280410	105289528	9119	2	74356	ENSMUST00000171788.7	0	ENSMUSG00000014837	RIKEN cDNA 4931428F04 gene
Otx2os1	5.00168	0.426655	0.100371	0.69304	Promoter (<=1kb)	48673151	48673550	14	48673666	48855915	182250	1	606497	ENSMUST00000227221.1	-116	ENSMUSG00000098682	orthodenticle homeobox 2 opposite strand 1
Itgb5	3.34297	0.835892	0.100428	0.69304	Promoter (<=1kb)	33830277	33830676	16	33829677	33949153	119477	1	16419	ENSMUST00000069345.5	600	ENSMUSG00000022817	integrin beta 5
Cpm	6.35182	0.356958	0.100455	0.69304	Promoter (<=1kb)	117629432	117629831	10	117629500	117635373	5874	1	70574	ENSMUST00000138020.7	0	ENSMUSG00000020183	carboxypeptidase M
Sgsm1	2.74825	-0.884563	0.100631	0.693473	Intron (ENSMUST00000048112.12/52850, intron 3 of 24)	113288373	113288772	5	113279610	113282892	3283	2	52850	ENSMUST00000138266.1	-5481	ENSMUSG00000042216	small G protein signaling modulator 1
Ltc4s	2.74751	1.01328	0.100962	0.694976	Promoter (<=1kb)	50236916	50237315	11	50236461	50237557	1097	2	17001	ENSMUST00000221391.1	242	ENSMUSG00000020377	leukotriene C4 synthase
Epb41l4b	1.81109	1.4852	0.10131	0.695435	Intron (ENSMUST00000095076.9/54357, intron 6 of 25)	57082560	57082959	4	57063030	57070559	7530	2	54357	ENSMUST00000150665.1	-12001	ENSMUSG00000028434	erythrocyte membrane protein band 4.1 like 4b
Vgf	6.22286	-0.351593	0.101334	0.695435	Promoter (<=1kb)	137030013	137030412	5	137030295	137033351	3057	1	381677	ENSMUST00000041543.8	0	ENSMUSG00000037428	VGF nerve growth factor inducible
Ttc34	2.31999	-1.01753	0.101487	0.695435	Promoter (<=1kb)	154855199	154855598	4	154856200	154867127	10928	1	242800	ENSMUST00000050220.3	-602	ENSMUSG00000046637	tetratricopeptide repeat domain 34
Tpm1	5.9109	0.363709	0.101748	0.695435	Promoter (<=1kb)	67048558	67048957	9	67032220	67049118	16899	2	22003	ENSMUST00000129466.7	161	ENSMUSG00000032366	tropomyosin 1, alpha
Psd3	1.47642	1.73559	0.101821	0.695435	Promoter (1-2kb)	67952987	67953386	8	67903648	67951879	48232	2	234353	ENSMUST00000145595.1	-1108	ENSMUSG00000030465	pleckstrin and Sec7 domain containing 3
Myh15	0	3.4754	0.101853	0.695435	Distal Intergenic	49318633	49319032	16	49057486	49199104	141619	1	667772	ENSMUST00000168680.1	261147	ENSMUSG00000092009	myosin, heavy chain 15
Lrrc74b	1.00261	2.18714	0.101997	0.695435	Promoter (<=1kb)	17560719	17561118	16	17548811	17561244	12434	2	74685	ENSMUST00000232637.1	126	ENSMUSG00000022759	leucine rich repeat containing 74B
I0C0044D17Rik	0	3.45778	0.102151	0.695435	Distal Intergenic	98837069	98837468	4	98818475	98823840	5366	2	545660	ENSMUST00000097964.2	-13229	ENSMUSG00000073794	RIKEN cDNA I0C0044D17 gene
Gcm1	0	3.45778	0.102151	0.695435	Intron (ENSMUST00000024104.8/14531, intron 3 of 5)	78059993	78060392	9	78051924	78065624	13701	1	14531	ENSMUST00000024104.8	8069	ENSMUSG00000023333	glial cells missing homolog 1
Sacs	2.46967	1.13206	0.102364	0.695435	Promoter (<=1kb)	61172570	61172969	14	61172990	61195663	22674	1	50720	ENSMUST00000121091.1	-21	ENSMUSG00000048279	sacsin
Nexn	2.45429	1.13775	0.102379	0.695435	Promoter (<=1kb)	152265862	152266261	3	152236982	152266318	29337	2	68810	ENSMUST00000046045.12	57	ENSMUSG00000039103	nexilin
Gdf1	2.0816	-1.11012	0.102386	0.695435	Promoter (1-2kb)	70331096	70331495	8	70329817	70331587	1771	1	14559	ENSMUST00000207684.1	1279	ENSMUSG00000087408	growth differentiation factor 1
Fbxo43	2.79824	-0.867962	0.102884	0.697716	Promoter (<=1kb)	36165075	36165474	15	36150060	36164884	14825	2	78803	ENSMUST00000058643.3	-191	ENSMUSG00000048230	F-box protein 43
Arhgap29	3.38523	0.817714	0.102949	0.697716	Promoter (<=1kb)	121967610	121968009	3	121967829	121992797	24969	1	214137	ENSMUST00000196479.4	0	ENSMUSG00000039831	Rho GTPase activating protein 29
Rreb1	5.60161	0.366593	0.103279	0.698721	Promoter (<=1kb)	37827680	37828079	13	37827393	37932693	105301	1	68750	ENSMUST00000110237.8	287	ENSMUSG00000039087	ras responsive element binding protein 1
Agap2	6.33913	-0.348627	0.103351	0.698721	Promoter (1-2kb)	127080230	127080629	10	127078907	127093169	14263	1	216439	ENSMUST00000217941.1	1323	ENSMUSG00000025422	ArfGAP with GTPase domain, ankyrin repeat and PH domain 2
Pax3	1.60579	-1.32218	0.103599	0.698721	Distal Intergenic	78017837	78018236	1	78101267	78196838	95572	2	18505	ENSMUST00000004994.15	178602	ENSMUSG00000004872	paired box 3
Lrmda	1.47112	1.74804	0.103668	0.698721	Intron (ENSMUST00000075639.10/76633, intron 2 of 6)	22349003	22349402	14	22310165	22584439	274275	1	76633	ENSMUST00000159107.1	38838	ENSMUSG00000063458	leucine rich melanocyte differentiation associated
Rnf220	1.79606	1.48115	0.104115	0.698721	Intron (ENSMUST00000030439.14/66743, intron 2 of 14)	117312011	117312410	4	117285889	117300028	14140	2	66743	ENSMUST00000150148.1	-11983	ENSMUSG00000028677	ring finger protein 220
Ntng1	1.14225	-1.5702	0.104136	0.698721	Promoter (<=1kb)	110143279	110143678	3	109781115	110143475	362361	2	80883	ENSMUST00000128219.8	0	ENSMUSG00000059857	netrin G1
Dmrt1i	4.66787	0.478842	0.104244	0.698721	Promoter (<=1kb)	144357698	144358097	5	144357923	144361048	3126	1	100579137	ENSMUST00000197311.1	0	ENSMUSG00000104600	Dmrt1 interacting ncRNA
Prdm16	1.66454	-1.32832	0.104279	0.698721	Intron (ENSMUST00000030902.12/70673, intron 2 of 16)	154518782	154519181	4	154476469	154528765	52297	2	70673	ENSMUST00000135064.1	9584	ENSMUSG00000039410	PR domain containing 16
Grin3a	2.85836	-0.84707	0.104337	0.698721	Promoter (<=1kb)	49844484	49844883	4	49661611	49845549	183939	2	242443	ENSMUST00000076674.3	666	ENSMUSG00000039579	glutamate receptor ionotropic, NMDA3A
Sox10	6.05222	0.353567	0.104481	0.698721	Promoter (<=1kb)	79163425	79163824	15	79156241	79164474	8234	2	20665	ENSMUST00000230261.1	650	ENSMUSG00000033006	SRY (sex determining region Y)-box 10
Spns2	2.64584	-0.908733	0.104611	0.698721	Promoter (<=1kb)	72488707	72489106	11	72451638	72489904	38267	2	216892	ENSMUST00000045303.9	798	ENSMUSG00000040447	spinster homolog 2
Mdfi	5.50834	-0.358274	0.104637	0.698721	Promoter (<=1kb)	47833683	47834082	17	47815336	47833291	17956	2	17240	ENSMUST00000035375.13	-392	ENSMUSG00000032717	MyoD family inhibitor
Fosl2	5.01014	0.419344	0.104639	0.698721	Promoter (2-3kb)	32133223	32133622	5	32135801	32157842	22042	1	14284	ENSMUST00000031017.10	-2179	ENSMUSG00000029135	fos-like antigen 2
Rfx4	5.47046	0.370488	0.104732	0.698721	Promoter (2-3kb)	84758859	84759258	10	84756062	84906144	150083	1	71137	ENSMUST00000060397.12	2797	ENSMUSG00000020037	regulatory factor X, 4 (influences HLA class II expression)
Nrg2	4.78856	0.453	0.105173	0.698721	Intron (ENSMUST00000115713.8/100042150, intron 1 of 9)	36068651	36069050	18	36022306	36052884	30579	2	100042150	ENSMUST00000237681.1	-15767	ENSMUSG00000060275	neuregulin 2
Car11	5.35739	-0.364087	0.105501	0.698721	Promoter (<=1kb)	45699793	45700192	7	45699843	45704682	4840	1	12348	ENSMUST00000003360.9	0	ENSMUSG00000003273	carbonic anhydrase 11
Pou3f1	6.1839	-0.345041	0.105522	0.698721	Promoter (1-2kb)	124658515	124658914	4	124656807	124660655	3849	1	18991	ENSMUST00000053491.8	1708	ENSMUSG00000090125	POU domain, class 3, transcription factor 1
Lrrc4c	2.28397	1.19549	0.105566	0.698721	Promoter (<=1kb)	97468690	97469089	2	97468089	97629063	160975	1	241568	ENSMUST00000170144.1	601	ENSMUSG00000050587	leucine rich repeat containing 4C
Dcdc2a	2.95417	0.953775	0.105723	0.698721	Promoter (<=1kb)	25055765	25056164	13	25056004	25121523	65520	1	195208	ENSMUST00000036932.14	0	ENSMUSG00000035910	doublecortin domain containing 2a
Gm32141	3.21775	0.85906	0.105986	0.698721	Distal Intergenic	117498241	117498640	10	117446015	117447493	1479	2	102634600	ENSMUST00000220189.1	-50748	ENSMUSG00000112344	predicted gene, 32141
Flt3	5.22705	0.389026	0.106022	0.698721	Promoter (<=1kb)	147400077	147400476	5	147330741	147400489	69749	2	14255	ENSMUST00000049324.12	13	ENSMUSG00000042817	FMS-like tyrosine kinase 3
Mocos	4.94505	-0.400164	0.106075	0.698721	Promoter (<=1kb)	24653529	24653928	18	24653691	24701575	47885	1	68591	ENSMUST00000068006.8	0	ENSMUSG00000039616	molybdenum cofactor sulfurase
Nos1ap	0	3.41823	0.106215	0.698721	Intron (ENSMUST00000160456.7/70729, intron 2 of 9)	170392472	170392871	1	170338209	170454914	116706	2	70729	ENSMUST00000160816.7	62043	ENSMUSG00000038473	nitric oxide synthase 1 (neuronal) adaptor protein
Chst8	0	3.41823	0.106215	0.698721	Intron (ENSMUST00000078686.7/68947, intron 1 of 3)	34798229	34798628	7	34695122	34812672	117551	2	68947	ENSMUST00000205390.1	14044	ENSMUSG00000060402	carbohydrate sulfotransferase 8
Zbtb16	0	3.41823	0.106215	0.698721	Intron (ENSMUST00000093852.4/235320, intron 3 of 6)	48733983	48734382	9	48654297	48835945	181649	2	235320	ENSMUST00000093852.4	101563	ENSMUSG00000066687	zinc finger and BTB domain containing 16
Fam189a2	2.74358	1.0089	0.106226	0.698721	Promoter (<=1kb)	24030535	24030934	19	23972750	24031019	58270	2	381217	ENSMUST00000096164.5	85	ENSMUSG00000071604	family with sequence similarity 189, member A2
Gnb1l	3.47285	-0.711031	0.106387	0.698721	Promoter (<=1kb)	18498555	18498954	16	18498713	18564540	65828	1	13972	ENSMUST00000231621.1	0	ENSMUSG00000000884	guanine nucleotide binding protein (G protein), beta polypeptide 1-like
Osmr	4.46063	0.520625	0.106389	0.698721	Promoter (<=1kb)	6873624	6874023	15	6843969	6874257	30289	2	18414	ENSMUST00000177478.1	234	ENSMUSG00000022146	oncostatin M receptor
1700121N20Rik	2.7291	-0.88351	0.106394	0.698721	Distal Intergenic	106478145	106478544	12	106442653	106447666	5014	2	76639	ENSMUST00000167922.1	-30479	ENSMUSG00000092066	RIKEN cDNA 1700121N20 gene
Ptprs	1.81349	1.47057	0.106519	0.698796	Promoter (<=1kb)	56473373	56473772	17	56454966	56474627	19662	2	19280	ENSMUST00000223742.1	855	ENSMUSG00000013236	protein tyrosine phosphatase, receptor type, S
Fst	5.4269	0.37166	0.107069	0.698952	Promoter (1-2kb)	114457038	114457437	13	114453342	114458586	5245	2	14313	ENSMUST00000231252.1	1149	ENSMUSG00000021765	follistatin
Prss8	2.8771	0.945249	0.10722	0.698952	Promoter (<=1kb)	127929310	127929709	7	127926762	127930095	3334	2	76560	ENSMUST00000206568.1	386	ENSMUSG00000030800	protease, serine 8 (prostasin)
Nhsl1	2.58688	1.0589	0.107285	0.698952	Intron (ENSMUST00000207038.1/215819, intron 1 of 6)	18355654	18356053	10	18390322	18524289	133968	1	215819	ENSMUST00000159299.7	-34269	ENSMUSG00000039835	NHS-like 1
Iqca	2.42154	-0.965275	0.107307	0.698952	Promoter (4-5kb)	90050028	90050427	1	90042140	90054960	12821	2	74918	ENSMUST00000212859.1	4533	ENSMUSG00000026301	IQ motif containing with AAA domain
BC006965	1.5056	-1.35918	0.107386	0.698952	Promoter (2-3kb)	112778960	112779359	11	112687645	112781976	94332	2	217294	ENSMUST00000137081.7	2617	ENSMUSG00000041674	cDNA sequence BC006965
Bcor	0.994018	2.14121	0.107387	0.698952	Distal Intergenic	11807212	11807611	20	12036740	12080553	43814	2	71458	ENSMUST00000065143.13	272942	ENSMUSG00000040363	BCL6 interacting corepressor
Gm20556	3.81245	-0.633216	0.107405	0.698952	Promoter (<=1kb)	84720021	84720420	15	84714629	84720266	5638	2	328576	ENSMUST00000229841.1	0	ENSMUSG00000116396	predicted gene, 20556
Kif17	0.864804	-1.69826	0.107452	0.698952	Promoter (1-2kb)	138264310	138264709	4	138262499	138287162	24664	1	16559	ENSMUST00000105820.1	1811	ENSMUSG00000028758	kinesin family member 17
Dnajc17	2.74662	1.00821	0.10778	0.699091	Promoter (<=1kb)	119208671	119209070	2	119172500	119208795	36296	2	69408	ENSMUST00000038439.3	0	ENSMUSG00000034278	DnaJ heat shock protein family (Hsp40) member C17
Chn2	1.81909	1.46504	0.107862	0.699091	Promoter (<=1kb)	54039720	54040119	6	54040039	54222550	182512	1	69993	ENSMUST00000114403.7	0	ENSMUSG00000004633	chimerin 2
Kcnh2	1.49437	1.70691	0.107913	0.699091	Promoter (<=1kb)	24321713	24322112	5	24320083	24322254	2172	2	16511	ENSMUST00000129246.1	142	ENSMUSG00000038319	potassium voltage-gated channel, subfamily H (eag-related), member 2
Stag3	2.78252	-0.863761	0.108249	0.699091	Promoter (<=1kb)	138279976	138280375	5	138280240	138290751	10512	1	50878	ENSMUST00000160729.7	0	ENSMUSG00000036928	stromal antigen 3
H2-D1	4.01037	-0.581336	0.108338	0.699091	Promoter (<=1kb)	35263919	35264318	17	35263096	35267353	4258	1	14964	ENSMUST00000172503.2	823	ENSMUSG00000073411	histocompatibility 2, D region locus 1
Ubiad1	1.09914	-1.55315	0.108496	0.699091	Distal Intergenic	148416199	148416598	4	148436489	148444761	8273	2	71707	ENSMUST00000156686.1	28163	ENSMUSG00000047719	UbiA prenyltransferase domain containing 1
C130021I20Rik	0	-2.41918	0.108503	0.699091	Distal Intergenic	33701991	33702390	2	33641331	33646354	5024	1	100504399	ENSMUST00000147294.2	60660	NA	Riken cDNA C130021I20 gene
Atxn7l1	3.33157	-0.744472	0.108512	0.699091	Promoter (1-2kb)	33304086	33304485	12	33302515	33368273	65759	1	380753	ENSMUST00000090597.10	1571	ENSMUSG00000020564	ataxin 7-like 1
5830408C22Rik	5.93101	0.351757	0.108675	0.699091	Promoter (<=1kb)	25102178	25102577	8	25102179	25109571	7393	1	74744	ENSMUST00000211653.1	0	ENSMUSG00000110148	RIKEN cDNA 5830408C22 gene
Olig3	1.46741	1.70069	0.108739	0.699091	Intron (ENSMUST00000213234.1/ENSMUST00000213234.1, intron 3 of 4)	19308806	19309205	10	19356533	19358604	2072	1	94222	ENSMUST00000053225.6	-47328	ENSMUSG00000045591	oligodendrocyte transcription factor 3
Sctr	2.60329	1.0352	0.109064	0.699091	Promoter (<=1kb)	120007299	120007698	1	120007034	120063534	56501	1	319229	ENSMUST00000189037.1	265	ENSMUSG00000026387	secretin receptor
Rp1	0	3.39643	0.109135	0.699091	Intron (ENSMUST00000208660.1/19888, intron 8 of 29)	4256661	4257060	1	4344146	4360314	16169	2	19888	ENSMUST00000027032.5	103254	ENSMUSG00000025900	retinitis pigmentosa 1 (human)
Gprin1	0	3.39643	0.109135	0.699091	Promoter (4-5kb)	54754662	54755061	13	54736671	54749874	13204	2	26913	ENSMUST00000135343.1	-4788	ENSMUSG00000069227	G protein-regulated inducer of neurite outgrowth 1
Glis1	0	3.39643	0.109135	0.699091	Promoter (1-2kb)	107613518	107613917	4	107615000	107632393	17394	1	230587	ENSMUST00000125573.1	-1083	ENSMUSG00000034762	GLIS family zinc finger 1
Ccdc9b	2.15699	-1.04902	0.109404	0.699091	Promoter (<=1kb)	118762043	118762442	2	118757498	118762625	5128	2	214239	ENSMUST00000151270.1	183	ENSMUSG00000045838	coiled-coil domain containing 9B
Fgf4	1.29726	-1.43995	0.109492	0.699091	Intron (ENSMUST00000208265.1/14175, intron 1 of 2)	144853989	144854388	7	144847367	144862890	15524	1	14175	ENSMUST00000208265.1	6622	ENSMUSG00000050917	fibroblast growth factor 4
Prdm14	7.24883	0.345312	0.109559	0.699091	Promoter (<=1kb)	13126901	13127300	1	13113457	13127163	13707	2	383491	ENSMUST00000047577.6	0	ENSMUSG00000042414	PR domain containing 14
Tmem135	2.61043	1.0316	0.109751	0.699091	Promoter (<=1kb)	89403901	89404300	7	89156448	89404222	247775	2	72759	ENSMUST00000124477.7	0	ENSMUSG00000039428	transmembrane protein 135
Rfx6	3.70799	0.715284	0.109763	0.699091	Promoter (<=1kb)	51677741	51678140	10	51677756	51721908	44153	1	320995	ENSMUST00000217662.1	0	ENSMUSG00000019900	regulatory factor X, 6
Thsd4	3.25655	0.840057	0.109893	0.699091	Intron (ENSMUST00000171654.7/207596, intron 5 of 16)	60278829	60279228	9	59969719	60141220	171502	2	207596	ENSMUST00000034829.5	-137609	ENSMUSG00000032289	thrombospondin, type I, domain containing 4
Ccdc106	6.0791	-0.347187	0.110134	0.699091	Promoter (1-2kb)	5054092	5054491	7	5056152	5060782	4631	1	232821	ENSMUST00000108571.8	-1661	ENSMUSG00000035228	coiled-coil domain containing 106
Tmem132e	5.11373	-0.37648	0.110206	0.699091	Promoter (<=1kb)	82388903	82389302	11	82389123	82434723	45601	1	270893	ENSMUST00000132477.1	0	ENSMUSG00000020701	transmembrane protein 132E
Cpne9	5.58767	0.357597	0.11022	0.699091	Promoter (<=1kb)	113282650	113283049	6	113282365	113284424	2060	1	211232	ENSMUST00000138388.1	285	ENSMUSG00000030270	copine family member IX
Ccnd2	6.10758	-0.34593	0.110279	0.699091	Promoter (1-2kb)	127154055	127154454	6	127146023	127152193	6171	2	12444	ENSMUST00000201902.3	-1862	ENSMUSG00000000184	cyclin D2
Zyg11a	4.93576	-0.403474	0.110682	0.699091	Promoter (<=1kb)	108217240	108217639	4	108181738	108217922	36185	2	230590	ENSMUST00000223127.1	283	ENSMUSG00000034645	zyg-11 family member A, cell cycle regulator
1700012I11Rik	1.46198	1.69451	0.110743	0.699091	Intron (ENSMUST00000187233.1/69334, intron 2 of 8)	67249525	67249924	15	67226769	67377094	150326	1	69334	ENSMUST00000187233.1	22756	ENSMUSG00000102069	RIKEN cDNA 1700012I11 gene
Sdc4	2.61408	1.02822	0.110806	0.699091	Promoter (<=1kb)	164442477	164442876	2	164424247	164443186	18940	2	20971	ENSMUST00000017153.3	310	ENSMUSG00000017009	syndecan 4
Zfp687	2.95168	-0.820457	0.110826	0.699091	Promoter (<=1kb)	95015455	95015854	3	95011840	95015448	3609	2	78266	ENSMUST00000132195.7	-7	ENSMUSG00000019338	zinc finger protein 687
Vav1	4.36205	0.541381	0.110961	0.699091	Promoter (3-4kb)	57275405	57275804	17	57279100	57327950	48851	1	22324	ENSMUST00000169220.8	-3296	ENSMUSG00000034116	vav 1 oncogene
5031425F14Rik	3.48007	0.774453	0.110997	0.699091	Distal Intergenic	166425284	166425683	2	166447451	166459232	11782	1	319684	ENSMUST00000127920.1	-21768	NA	RIKEN cDNA 5031425F14 gene
Epha2	6.0123	0.351874	0.111097	0.699091	Promoter (<=1kb)	141302770	141303169	4	141302407	141308734	6328	1	13836	ENSMUST00000131026.1	363	ENSMUSG00000006445	Eph receptor A2
Tmem121b	3.50018	-0.698515	0.11119	0.699091	Promoter (<=1kb)	120492562	120492961	6	120488939	120493807	4869	2	94047	ENSMUST00000178687.1	846	ENSMUSG00000094626	transmembrane protein 121B
Ank1	5.09182	0.398663	0.111365	0.699091	Promoter (<=1kb)	22975324	22975723	8	22975136	23148307	173172	1	11733	ENSMUST00000117270.8	188	ENSMUSG00000031543	ankyrin 1, erythroid
Cryz	0	3.37851	0.111419	0.699091	Promoter (2-3kb)	154609011	154609410	3	154606447	154622170	15724	1	12972	ENSMUST00000195103.1	2564	ENSMUSG00000028199	crystallin, zeta
Egfem1	2.83578	-0.837177	0.111483	0.699091	Promoter (<=1kb)	29082672	29083071	3	29082733	29691209	608477	1	75740	ENSMUST00000119598.7	0	ENSMUSG00000063600	EGF-like and EMI domain containing 1
Esr1	5.0496	0.406113	0.111568	0.699091	Promoter (<=1kb)	4712120	4712519	10	4712651	4784824	72174	1	13982	ENSMUST00000127145.1	-132	ENSMUSG00000019768	estrogen receptor 1 (alpha)
Inka1	2.98032	-0.805916	0.112105	0.700441	Promoter (<=1kb)	107985424	107985823	9	107984633	107985632	1000	2	68176	ENSMUST00000175914.1	0	ENSMUSG00000042106	inka box actin regulator 1
Pdxk-ps	3.11363	0.863901	0.112127	0.700441	Exon (ENSMUST00000237900.1/ENSMUST00000237900.1, exon 1 of 2)	32113792	32114191	17	32078797	32107350	28554	2	435518	ENSMUST00000183934.1	-6442	ENSMUSG00000002791	pyridoxal (pyridoxine, vitamin B6) kinase, pseudogene
Cxcl14	6.42761	-0.340247	0.11219	0.700441	Promoter (<=1kb)	56295911	56296310	13	56288643	56296305	7663	2	57266	ENSMUST00000224801.1	0	ENSMUSG00000021508	chemokine (C-X-C motif) ligand 14
Fblim1	5.25281	-0.364119	0.112239	0.700441	Promoter (<=1kb)	141599339	141599738	4	141589298	141599835	10538	2	74202	ENSMUST00000141518.7	97	ENSMUSG00000006219	filamin binding LIM protein 1
Serpine2	3.65832	0.727094	0.112492	0.701309	Promoter (<=1kb)	79857770	79858169	1	79794197	79858696	64500	2	20720	ENSMUST00000027467.10	527	ENSMUSG00000026249	serine (or cysteine) peptidase inhibitor, clade E, member 2
Car12	1.29071	-1.42872	0.112783	0.702406	Promoter (<=1kb)	66713374	66713773	9	66713686	66766845	53160	1	76459	ENSMUST00000071889.12	0	ENSMUSG00000032373	carbonic anhydrase 12
5530601H04Rik	0.979383	2.16573	0.11314	0.703012	Distal Intergenic	105002494	105002893	20	105044001	105070035	26035	2	71445	ENSMUST00000127409.7	67142	ENSMUSG00000087174	RIKEN cDNA 5530601H04 gene
Esyt1	1.44185	1.68788	0.113141	0.703012	Promoter (1-2kb)	128516623	128517022	10	128514191	128518554	4364	2	23943	ENSMUST00000218092.1	1532	ENSMUSG00000025366	extended synaptotagmin-like protein 1
1700122O11Rik	3.80325	-0.625343	0.113465	0.703012	Promoter (3-4kb)	48041564	48041963	17	48036745	48038293	1549	2	76651	ENSMUST00000178823.1	-3271	ENSMUSG00000094928	RIKEN cDNA 1700122O11 gene
Nkx2-3	5.50174	0.364334	0.113551	0.703012	Distal Intergenic	43583945	43584344	19	43612325	43615892	3568	1	18089	ENSMUST00000057178.10	-27981	ENSMUSG00000044220	NK2 homeobox 3
Ttll6	5.43612	0.364648	0.113742	0.703012	Distal Intergenic	96124406	96124805	11	96133786	96165451	31666	1	237930	ENSMUST00000167258.7	-8981	ENSMUSG00000038756	tubulin tyrosine ligase-like family, member 6
Hs3st1	5.49495	0.360716	0.113767	0.703012	Distal Intergenic	39773852	39774251	5	39613935	39755475	141541	2	15476	ENSMUST00000117944.1	-18377	ENSMUSG00000051022	heparan sulfate (glucosamine) 3-O-sulfotransferase 1
Dlx3	2.41142	1.09875	0.114075	0.703012	Distal Intergenic	95105619	95106018	11	95120119	95125296	5178	1	13393	ENSMUST00000092768.6	-14101	ENSMUSG00000001510	distal-less homeobox 3
Cd247	4.09757	0.608506	0.114155	0.703012	Intron (ENSMUST00000161971.7/12503, intron 1 of 7)	165817646	165818045	1	165788765	165870249	81485	1	12503	ENSMUST00000161559.2	28881	ENSMUSG00000005763	CD247 antigen
Ankhd1	2.97282	-0.803841	0.114183	0.703012	Promoter (<=1kb)	36560233	36560632	18	36560611	36658908	98298	1	108857	ENSMUST00000006205.13	0	ENSMUSG00000024483	ankyrin repeat and KH domain containing 1
Gm20554	3.48374	0.762501	0.114416	0.703012	Distal Intergenic	72356840	72357239	13	72626213	72628564	2352	2	328287	ENSMUST00000177421.3	271325	NA	predicted gene, 20554
Htra3	3.11067	0.86015	0.114443	0.703012	Promoter (<=1kb)	35678771	35679170	5	35653017	35679094	26078	2	78558	ENSMUST00000201028.1	0	ENSMUSG00000029096	HtrA serine peptidase 3
Lingo2	3.86138	-0.605394	0.114776	0.703012	Promoter (<=1kb)	36951238	36951637	4	35707406	36951223	1243818	2	242384	ENSMUST00000108122.7	-15	ENSMUSG00000045083	leucine rich repeat and Ig domain containing 2
Slc4a3	2.24513	1.17623	0.114835	0.703012	Promoter (<=1kb)	75546404	75546803	1	75546462	75548038	1577	1	20536	ENSMUST00000150142.7	0	ENSMUSG00000006576	solute carrier family 4 (anion exchanger), member 3
Otp	4.39457	-0.4898	0.114894	0.703012	Promoter (2-3kb)	94879864	94880263	13	94882600	94883552	953	1	18420	ENSMUST00000184985.1	-2337	ENSMUSG00000021685	orthopedia homeobox
Zfp618	0.574274	-1.83808	0.115072	0.703012	Distal Intergenic	62870449	62870848	4	62965573	63115748	150176	1	72701	ENSMUST00000030043.12	-94725	ENSMUSG00000028358	zinc finger protein 618
Mir669h	1.4199	1.6908	0.115283	0.703012	Distal Intergenic	10736517	10736916	2	10518155	10518279	125	1	100316831	ENSMUST00000116944.1	218362	ENSMUSG00000080594	microRNA 669h
Pnmt	3.52136	0.757314	0.115483	0.703012	Promoter (<=1kb)	98386388	98386787	11	98386450	98388181	1732	1	18948	ENSMUST00000041301.7	0	ENSMUSG00000038216	phenylethanolamine-N-methyltransferase
Sp8	1.77857	1.4485	0.115525	0.703012	Distal Intergenic	118811822	118812221	12	118846329	118852576	6248	1	320145	ENSMUST00000063918.3	-34108	ENSMUSG00000048562	trans-acting transcription factor 8
Socs3	2.60082	1.02026	0.115585	0.703012	Distal Intergenic	117930933	117931332	11	117966079	117969186	3108	2	12702	ENSMUST00000054002.3	37854	ENSMUSG00000053113	suppressor of cytokine signaling 3
Sema6b	2.41161	-0.945135	0.11561	0.703012	Distal Intergenic	56147797	56148196	17	56123085	56140343	17259	2	20359	ENSMUST00000001256.10	-7454	ENSMUSG00000001227	sema domain, transmembrane domain (TM), and cytoplasmic domain, (semaphorin) 6B
Coro2a	4.98754	0.406097	0.115777	0.703012	Promoter (<=1kb)	46601066	46601465	4	46543001	46601891	58891	2	107684	ENSMUST00000139179.1	426	ENSMUSG00000028337	coronin, actin binding protein 2A
1600027J07Rik	2.47008	1.08924	0.115778	0.703012	Intron (ENSMUST00000209324.1/ENSMUST00000209324.1, intron 2 of 3)	103316765	103317164	8	103343878	103347534	3657	2	69794	ENSMUST00000209501.1	30370	ENSMUSG00000110340	RIKEN cDNA 1600027J07 gene
Plagl1	3.75385	0.690157	0.115913	0.703012	Promoter (<=1kb)	13061151	13061550	10	13060504	13127354	66851	1	22634	ENSMUST00000193426.5	647	ENSMUSG00000019817	pleiomorphic adenoma gene-like 1
Hdgfl2	2.87173	-0.837021	0.11604	0.703012	Promoter (<=1kb)	56079200	56079599	17	56079634	56100592	20959	1	15193	ENSMUST00000226053.1	-35	ENSMUSG00000002833	HDGF like 2
Begain	1.75333	1.45275	0.11611	0.703012	Promoter (<=1kb)	109067145	109067544	12	109032187	109068217	36031	2	380785	ENSMUST00000190647.2	673	ENSMUSG00000040867	brain-enriched guanylate kinase-associated
Nhsl1	1.41889	1.68959	0.116153	0.703012	Promoter (<=1kb)	18407307	18407706	10	18407638	18421140	13503	1	215819	ENSMUST00000161510.1	0	ENSMUSG00000039835	NHS-like 1
Lif	3.83242	-0.610867	0.116198	0.703012	Promoter (<=1kb)	4266575	4266974	11	4266796	4268249	1454	1	16878	ENSMUST00000154927.1	0	ENSMUSG00000034394	leukemia inhibitory factor
Tspan33	0.55809	-1.83953	0.1162	0.703012	Promoter (<=1kb)	29694101	29694500	6	29694222	29718559	24338	1	232670	ENSMUST00000046750.13	0	ENSMUSG00000001763	tetraspanin 33
Smim20	2.61792	-0.883358	0.116374	0.703012	Distal Intergenic	53258165	53258564	5	53267083	53268591	1509	1	66278	ENSMUST00000203623.1	-8519	ENSMUSG00000061461	small integral membrane protein 20
Rgs14	4.93076	0.419847	0.116558	0.703012	Promoter (<=1kb)	55379023	55379422	13	55379169	55384686	5518	1	51791	ENSMUST00000135851.1	0	ENSMUSG00000052087	regulator of G-protein signaling 14
Cbarp	3.55369	-0.672856	0.116574	0.703012	Promoter (<=1kb)	80136969	80137368	10	80136663	80137352	690	2	100503659	ENSMUST00000128465.7	0	ENSMUSG00000035640	calcium channel, voltage-dependent, beta subunit associated regulatory protein
Jsrp1	4.75305	0.44585	0.116768	0.703012	Promoter (2-3kb)	80808899	80809298	10	80808496	80811885	3390	2	71912	ENSMUST00000020435.10	2587	ENSMUSG00000020216	junctional sarcoplasmic reticulum protein 1
Adap2	5.40989	-0.348706	0.116853	0.703012	Promoter (<=1kb)	80154276	80154675	11	80154116	80165776	11661	1	216991	ENSMUST00000134118.1	160	ENSMUSG00000020709	ArfGAP with dual PH domains 2
Kctd15	6.48707	-0.334718	0.117002	0.703012	Exon (ENSMUST00000238947.1/68947, exon 4 of 4)	34675658	34676057	7	34639019	34655509	16491	2	233107	ENSMUST00000032709.2	-20149	ENSMUSG00000030499	potassium channel tetramerisation domain containing 15
Mir6973a	3.96556	0.629646	0.117122	0.703012	Promoter (<=1kb)	35195931	35196330	17	35194972	35195049	78	1	102465588	ENSMUST00000183646.1	959	ENSMUSG00000098291	microRNA 6973a
Gm38576	1.43505	1.68192	0.117234	0.703012	Distal Intergenic	84767712	84768111	18	84744067	84754251	10185	1	102641800	ENSMUST00000236805.1	23645	ENSMUSG00000118075	predicted gene, 38576
Cotl1	2.22918	-1.0054	0.117267	0.703012	Promoter (<=1kb)	119840452	119840851	8	119809222	119840544	31323	2	72042	ENSMUST00000034285.13	0	ENSMUSG00000031827	coactosin-like 1 (Dictyostelium)
Pax2	2.0062	1.29769	0.117276	0.703012	Intron (ENSMUST00000174490.8/18504, intron 3 of 9)	44770234	44770633	19	44759915	44818554	58640	1	18504	ENSMUST00000173346.3	10319	ENSMUSG00000004231	paired box 2
Gm29678	0.916557	2.12358	0.117424	0.703012	Distal Intergenic	190395588	190395987	1	190403645	190417145	13501	1	433390	ENSMUST00000193966.1	-7658	ENSMUSG00000103644	predicted gene, 29678
Phldb3	5.86352	0.342836	0.117699	0.703012	Promoter (<=1kb)	24611244	24611643	7	24611328	24629288	17961	1	232970	ENSMUST00000073325.5	0	ENSMUSG00000074277	pleckstrin homology like domain, family B, member 3
Arhgef16	4.59291	0.482323	0.117899	0.703012	Promoter (<=1kb)	154299874	154300273	4	154278486	154299892	21407	2	230972	ENSMUST00000144145.7	0	ENSMUSG00000029032	Rho guanine nucleotide exchange factor (GEF) 16
4933429O19Rik	1.57322	-1.27661	0.117926	0.703012	Intron (ENSMUST00000228153.1/606497, intron 2 of 4)	48853152	48853551	14	48878873	48886062	7190	1	66770	ENSMUST00000227828.1	-25322	ENSMUSG00000115008	RIKEN cDNA 4933429O19 gene
Tcerg1l	2.6193	-0.87803	0.118273	0.703012	Promoter (<=1kb)	138397041	138397440	7	138208974	138397728	188755	2	70571	ENSMUST00000160436.1	288	ENSMUSG00000091002	transcription elongation regulator 1-like
Sppl2c	0.914595	2.12133	0.118379	0.703012	Exon (ENSMUST00000093925.4/12921, exon 10 of 13)	104173340	104173739	11	104186327	104188551	2225	1	237958	ENSMUST00000107000.1	-12588	ENSMUSG00000049506	signal peptide peptidase 2C
Nr3c2	3.56258	0.737985	0.118545	0.703012	Promoter (<=1kb)	76901804	76902203	8	76902288	77242996	340709	1	110784	ENSMUST00000148106.7	-85	ENSMUSG00000031618	nuclear receptor subfamily 3, group C, member 2
Mtcl1	1.74336	1.44128	0.118554	0.703012	Promoter (<=1kb)	66450081	66450480	17	66336986	66449750	112765	2	68617	ENSMUST00000097291.9	-331	ENSMUSG00000052105	microtubule crosslinking factor 1
Tspan4	2.74803	0.959328	0.118923	0.703012	Promoter (<=1kb)	141476056	141476455	7	141476400	141493421	17022	1	64540	ENSMUST00000117634.1	0	ENSMUSG00000025511	tetraspanin 4
Spry2	0	3.31685	0.118927	0.703012	Promoter (1-2kb)	105894428	105894827	14	105891947	105896819	4873	2	24064	ENSMUST00000022709.5	1992	ENSMUSG00000022114	sprouty RTK signaling antagonist 2
Kit	0	3.31685	0.118927	0.703012	Distal Intergenic	75799278	75799677	5	75649094	75656694	7601	1	16590	ENSMUST00000202167.1	150184	ENSMUSG00000005672	KIT proto-oncogene receptor tyrosine kinase
Mid1	0	3.31685	0.118927	0.703012	Intron (ENSMUST00000112107.7/17318, intron 2 of 9)	169856514	169856913	20	169879622	169990798	111177	1	17318	ENSMUST00000112105.7	-22709	ENSMUSG00000035299	midline 1
2300002M23Rik	1.40743	1.67686	0.118941	0.703012	Promoter (<=1kb)	35567820	35568219	17	35567450	35568952	1503	1	69542	ENSMUST00000044326.4	370	ENSMUSG00000039269	RIKEN cDNA 2300002M23 gene
Fndc3a	3.17203	0.837435	0.119064	0.703012	Exon (ENSMUST00000208959.1/ENSMUST00000208959.1, exon 1 of 2)	72532088	72532487	14	72561447	72564718	3272	2	319448	ENSMUST00000159144.1	32231	ENSMUSG00000033487	fibronectin type III domain containing 3A
Fign	2.02179	1.28524	0.119117	0.703012	Intron (ENSMUST00000142353.1/ENSMUST00000142353.1, intron 1 of 1)	64389786	64390185	2	63977337	64098038	120702	2	60344	ENSMUST00000102728.3	-291748	ENSMUSG00000075324	fidgetin
Sgms2	3.77538	0.683931	0.119175	0.703012	Promoter (<=1kb)	131490263	131490662	3	131342169	131490479	148311	2	74442	ENSMUST00000197057.1	0	ENSMUSG00000050931	sphingomyelin synthase 2
Gm11733	0.561615	-1.81927	0.119207	0.703012	Distal Intergenic	117496174	117496573	11	117484368	117489014	4647	1	432615	ENSMUST00000092394.3	11806	ENSMUSG00000069588	predicted gene 11733
Rpl38	1.10649	-1.51065	0.119285	0.703012	Promoter (1-2kb)	114666560	114666959	11	114668524	114672331	3808	1	67671	ENSMUST00000106602.9	-1565	ENSMUSG00000057322	ribosomal protein L38
Gm29683	4.51627	0.487608	0.119739	0.704613	Distal Intergenic	69992437	69992836	7	70178868	70337822	158955	2	624549	ENSMUST00000208511.1	344986	ENSMUSG00000109097	predicted gene, 29683
Pja1	1.39978	1.68532	0.119785	0.704613	Distal Intergenic	99550069	99550468	20	99465734	99471273	5540	2	18744	ENSMUST00000113792.1	-78796	ENSMUSG00000034403	praja ring finger ubiquitin ligase 1
Grm3	2.02174	1.26814	0.120243	0.704661	Intron (ENSMUST00000004076.4/108069, intron 1 of 5)	9707287	9707686	5	9485541	9725170	239630	2	108069	ENSMUST00000004076.4	17484	ENSMUSG00000003974	glutamate receptor, metabotropic 3
Dusp10	2.84479	0.920174	0.120586	0.704661	Promoter (<=1kb)	184034199	184034598	1	184034381	184075636	41256	1	63953	ENSMUST00000048655.7	0	ENSMUSG00000039384	dual specificity phosphatase 10
Kbtbd11	1.40067	1.66925	0.12069	0.704661	Promoter (<=1kb)	15010977	15011376	8	15011025	15033333	22309	1	74901	ENSMUST00000069399.6	0	ENSMUSG00000055675	kelch repeat and BTB (POZ) domain containing 11
Tmem25	2.01391	1.2759	0.120863	0.704661	Promoter (<=1kb)	44799309	44799708	9	44793776	44799307	5532	2	71687	ENSMUST00000002100.7	-2	ENSMUSG00000002032	transmembrane protein 25
Npas1	6.61922	-0.330452	0.121386	0.704661	Promoter (<=1kb)	16475982	16476381	7	16455721	16475688	19968	2	18142	ENSMUST00000210748.1	-294	ENSMUSG00000001988	neuronal PAS domain protein 1
Exoc5	2.40651	1.08533	0.121402	0.704661	Distal Intergenic	48988707	48989106	14	49015471	49019792	4322	2	105504	ENSMUST00000160833.1	30686	ENSMUSG00000061244	exocyst complex component 5
Cdk6	2.87914	0.90815	0.121408	0.704661	Promoter (<=1kb)	3341684	3342083	5	3341485	3344453	2969	1	12571	ENSMUST00000199156.1	199	ENSMUSG00000040274	cyclin-dependent kinase 6
Lrg1	5.25661	-0.353148	0.12146	0.704661	Promoter (1-2kb)	56120377	56120776	17	56119678	56122001	2324	2	76905	ENSMUST00000041357.8	1225	ENSMUSG00000037095	leucine-rich alpha-2-glycoprotein 1
Slc39a11	2.57491	1.01267	0.121501	0.704661	Intron (ENSMUST00000071539.9/69806, intron 5 of 9)	113438241	113438640	11	113244853	113565756	320904	2	69806	ENSMUST00000071539.9	127116	ENSMUSG00000041654	solute carrier family 39 (metal ion transporter), member 11
Slc25a48	0.918543	2.10025	0.12162	0.704661	Intron (ENSMUST00000212844.1/ENSMUST00000212844.1, intron 2 of 3)	56429545	56429944	13	56438355	56474239	35885	1	328258	ENSMUST00000021971.5	-8411	ENSMUSG00000021509	solute carrier family 25, member 48
Lmo2	4.77013	-0.406309	0.121638	0.704661	Promoter (<=1kb)	103970627	103971026	2	103971179	103980916	9738	1	16909	ENSMUST00000133210.1	-153	ENSMUSG00000032698	LIM domain only 2
Impact	2.63414	-0.869314	0.121812	0.704661	Promoter (<=1kb)	12973749	12974148	18	12974298	12982175	7878	1	16210	ENSMUST00000234409.1	-150	ENSMUSG00000024423	impact, RWD domain protein
Ttll6	4.21379	0.558323	0.121888	0.704661	Intron (ENSMUST00000167258.7/237930, intron 8 of 14)	96145843	96146242	11	96134219	96165451	31233	1	237930	ENSMUST00000107680.1	11624	ENSMUSG00000038756	tubulin tyrosine ligase-like family, member 6
Ccdc88c	0.895368	2.10087	0.121897	0.704661	Promoter (<=1kb)	101027735	101028134	12	100969344	101028909	59566	2	68339	ENSMUST00000223097.1	775	ENSMUSG00000021182	coiled-coil domain containing 88C
Foxp4	0.895368	2.10087	0.121897	0.704661	Promoter (1-2kb)	47890428	47890827	17	47878285	47888433	10149	2	74123	ENSMUST00000136314.1	-1995	ENSMUSG00000023991	forkhead box P4
Fam163b	2.59624	1.01004	0.12209	0.704661	Promoter (<=1kb)	27142468	27142867	2	27110380	27142491	32112	2	109349	ENSMUST00000151224.2	0	ENSMUSG00000009216	family with sequence similarity 163, member B
Gm15559	2.88383	-0.810594	0.122119	0.704661	Promoter (<=1kb)	110770571	110770970	5	110770949	110779260	8312	1	100504049	ENSMUST00000132267.1	0	ENSMUSG00000086401	predicted gene 15559
Gdnf	7.43467	0.319826	0.122169	0.704661	Promoter (4-5kb)	7815534	7815933	15	7810846	7837575	26730	1	14573	ENSMUST00000022744.4	4688	ENSMUSG00000022144	glial cell line derived neurotrophic factor
Grin3b	4.98496	0.401258	0.122237	0.704661	Promoter (<=1kb)	79970772	79971171	10	79970715	79977190	6476	1	170483	ENSMUST00000045085.7	57	ENSMUSG00000035745	glutamate receptor, ionotropic, NMDA3B
Atp12a	4.66485	0.453944	0.122279	0.704661	Promoter (<=1kb)	56364842	56365241	14	56365068	56388550	23483	1	192113	ENSMUST00000007340.3	0	ENSMUSG00000022229	ATPase, H+/K+ transporting, nongastric, alpha polypeptide
Slit1	0.222554	-2.01714	0.122362	0.704661	Promoter (2-3kb)	41740661	41741060	19	41646103	41743486	97384	2	20562	ENSMUST00000171586.1	2426	ENSMUSG00000025020	slit guidance ligand 1
Socs1	2.99475	-0.777959	0.122561	0.704661	Promoter (<=1kb)	10784488	10784887	16	10782240	10785536	3297	2	12703	ENSMUST00000229866.1	649	ENSMUSG00000038037	suppressor of cytokine signaling 1
Ucn	6.92746	0.33105	0.122622	0.704661	Promoter (<=1kb)	31137959	31138358	5	31138063	31138829	767	2	22226	ENSMUST00000043475.6	471	ENSMUSG00000038676	urocortin
Nhsl1	1.41605	1.66034	0.122623	0.704661	Intron (ENSMUST00000207038.1/215819, intron 1 of 6)	18329272	18329671	10	18318985	18531973	212989	1	215819	ENSMUST00000207038.1	10287	ENSMUSG00000039835	NHS-like 1
Nkx6-1	0.225605	-2.02116	0.122659	0.704661	Distal Intergenic	101681957	101682356	5	101658139	101664996	6858	2	18096	ENSMUST00000044125.10	-16961	ENSMUSG00000035187	NK6 homeobox 1
Gas6	3.92614	0.632443	0.122803	0.704826	Promoter (<=1kb)	13493838	13494237	8	13465374	13494490	29117	2	14456	ENSMUST00000033828.6	253	ENSMUSG00000031451	growth arrest specific 6
Ephb4	2.23864	1.15526	0.12294	0.704953	Promoter (<=1kb)	137349819	137350218	5	137350109	137374528	24420	1	13846	ENSMUST00000061244.14	0	ENSMUSG00000029710	Eph receptor B4
Egr3	1.78343	1.43629	0.123063	0.705004	Intron (ENSMUST00000022678.4/73523, intron 4 of 6)	70019581	70019980	14	70077203	70079955	2753	1	13655	ENSMUST00000035908.2	-57223	ENSMUSG00000033730	early growth response 3
Tnni1	1.72896	1.42473	0.123398	0.705226	Intron (ENSMUST00000132795.7/21952, intron 2 of 6)	135793444	135793843	1	135799402	135810989	11588	1	21952	ENSMUST00000152208.7	-5559	ENSMUSG00000026418	troponin I, skeletal, slow 1
Gm12830	7.32386	0.322821	0.123401	0.705226	Distal Intergenic	114666683	114667082	4	114821722	114856166	34445	1	433746	ENSMUST00000137570.1	-154640	ENSMUSG00000055198	predicted gene 12830
Ppp3cc	4.76621	-0.410172	0.12346	0.705226	Promoter (1-2kb)	70287550	70287949	14	70217865	70289277	71413	2	19057	ENSMUST00000228911.1	1328	ENSMUSG00000022092	protein phosphatase 3, catalytic subunit, gamma isoform
Zfp536	1.74061	1.42539	0.123561	0.705226	Promoter (<=1kb)	37769173	37769572	7	37479104	37769624	290521	2	243937	ENSMUST00000175941.7	52	ENSMUSG00000043456	zinc finger protein 536
Tenm4	2.46636	-0.908765	0.123752	0.705253	Promoter (<=1kb)	96211377	96211776	7	96211671	96908554	696884	1	23966	ENSMUST00000107165.7	0	ENSMUSG00000048078	teneurin transmembrane protein 4
Pip5kl1	2.06316	-1.04593	0.123795	0.705253	Promoter (<=1kb)	32578638	32579037	2	32579927	32583772	3846	1	227733	ENSMUST00000124980.1	-890	ENSMUSG00000046854	phosphatidylinositol-4-phosphate 5-kinase-like 1
A930016O22Rik	2.84474	0.909344	0.124661	0.709529	Promoter (<=1kb)	19420403	19420802	7	19417466	19421417	3952	2	100503495	ENSMUST00000208685.1	615	ENSMUSG00000040705	RIKEN cDNA A930016O22 gene
Nav2	4.55869	0.473275	0.125053	0.710924	Promoter (<=1kb)	49246759	49247158	7	49246844	49610090	363247	1	78286	ENSMUST00000184945.7	0	ENSMUSG00000052512	neuron navigator 2
Meis1	4.80994	-0.398604	0.125137	0.710924	Distal Intergenic	19026740	19027139	11	18879817	19018985	139169	2	17268	ENSMUST00000144988.7	-7755	ENSMUSG00000020160	Meis homeobox 1
Pitpnm2	3.56079	0.726911	0.12552	0.711942	Promoter (<=1kb)	124248608	124249007	5	124118691	124249451	130761	2	19679	ENSMUST00000161273.7	444	ENSMUSG00000029406	phosphatidylinositol transfer protein, membrane-associated 2
Atp1a3	3.65931	-0.635789	0.125572	0.711942	Promoter (3-4kb)	25009506	25009905	7	24978167	25005958	27792	2	232975	ENSMUST00000080882.10	-3548	ENSMUSG00000040907	ATPase, Na+/K+ transporting, alpha 3 polypeptide
Copz2	0.876031	2.08027	0.12581	0.711942	Distal Intergenic	96874871	96875270	11	96854131	96861203	7073	1	56358	ENSMUST00000147710.1	20740	ENSMUSG00000018672	coatomer protein complex, subunit zeta 2
Otop1	6.56927	0.330236	0.125884	0.711942	Promoter (<=1kb)	38277356	38277755	5	38277404	38304208	26805	1	21906	ENSMUST00000114099.3	0	ENSMUSG00000051596	otopetrin 1
Plekhg3	6.03532	0.334959	0.126073	0.711942	Promoter (<=1kb)	76533879	76534278	12	76533620	76578682	45063	1	263406	ENSMUST00000219063.1	259	ENSMUSG00000052609	pleckstrin homology domain containing, family G (with RhoGef domain) member 3
Tsc22d3	3.5192	0.725084	0.126304	0.711942	Promoter (1-2kb)	140598354	140598753	20	140540262	140600659	60398	2	14605	ENSMUST00000112996.8	1906	ENSMUSG00000031431	TSC22 domain family, member 3
Slc10a7	2.55369	-0.883043	0.126306	0.711942	Promoter (<=1kb)	78509107	78509506	8	78509346	78712757	203412	1	76775	ENSMUST00000211332.1	0	ENSMUSG00000031684	solute carrier family 10 (sodium/bile acid cotransporter family), member 7
Ttc3	2.45311	-0.905933	0.126322	0.711942	Promoter (<=1kb)	94370447	94370846	16	94370618	94469220	98603	1	22129	ENSMUST00000117648.8	0	ENSMUSG00000040785	tetratricopeptide repeat domain 3
Col2a1	1.99743	1.26097	0.126417	0.711942	Promoter (2-3kb)	97993061	97993460	15	97988111	97990476	2366	2	12824	ENSMUST00000128547.1	-2585	ENSMUSG00000022483	collagen, type II, alpha 1
Guca1a	4.1237	0.572313	0.126801	0.711942	Exon (ENSMUST00000059348.8/14913, exon 3 of 4)	47394845	47395244	17	47394558	47400584	6027	2	14913	ENSMUST00000059348.8	5340	ENSMUSG00000023982	guanylate cyclase activator 1a (retina)
Nt5e	0.932096	2.07559	0.126806	0.711942	Distal Intergenic	88059664	88060063	9	88327197	88372092	44896	1	23959	ENSMUST00000034992.7	-267134	ENSMUSG00000032420	5' nucleotidase, ecto
Npr3	6.33499	0.331662	0.126884	0.711942	Promoter (<=1kb)	11904449	11904848	15	11839896	11905639	65744	2	18162	ENSMUST00000066529.4	791	ENSMUSG00000022206	natriuretic peptide receptor 3
Fli1	7.7955	0.307294	0.126934	0.711942	Promoter (<=1kb)	32542228	32542627	9	32428059	32542861	114803	2	14247	ENSMUST00000183767.1	234	ENSMUSG00000016087	Friend leukemia integration 1
Cd83	1.42742	-1.31913	0.126938	0.711942	Distal Intergenic	43809189	43809588	13	43785185	43803128	17944	1	12522	ENSMUST00000221359.1	24004	ENSMUSG00000015396	CD83 antigen
Mtus2	2.05044	-1.04006	0.127121	0.712095	Promoter (<=1kb)	147957003	147957402	5	147957320	148316065	358746	1	77521	ENSMUST00000085558.10	0	ENSMUSG00000029651	microtubule associated tumor suppressor candidate 2
Tm2d2	2.47901	-0.902303	0.127247	0.712095	Promoter (<=1kb)	25016946	25017345	8	25017211	25023260	6050	1	69742	ENSMUST00000033961.6	0	ENSMUSG00000031556	TM2 domain containing 2
Tctex1d1	3.93625	0.625798	0.127313	0.712095	Promoter (<=1kb)	102978323	102978722	4	102978606	102992546	13941	1	67344	ENSMUST00000220547.1	0	ENSMUSG00000028523	Tctex1 domain containing 1
Msx3	7.31095	0.318584	0.127599	0.712417	Promoter (<=1kb)	140048054	140048453	7	140046374	140049088	2715	2	17703	ENSMUST00000172775.3	635	ENSMUSG00000025469	msh homeobox 3
Il20rb	0.163011	-1.99488	0.127602	0.712417	Distal Intergenic	100287824	100288223	9	100458530	100461735	3206	2	213208	ENSMUST00000125259.1	173512	ENSMUSG00000044244	interleukin 20 receptor beta
Vsx2	7.61956	0.31547	0.127834	0.713063	Promoter (<=1kb)	84570542	84570941	12	84569840	84595457	25618	1	12677	ENSMUST00000169934.3	702	ENSMUSG00000021239	visual system homeobox 2
Ache	4.65081	-0.423743	0.128414	0.71565	Promoter (<=1kb)	137288479	137288878	5	137288285	137292348	4064	1	11423	ENSMUST00000150983.1	194	ENSMUSG00000023328	acetylcholinesterase
Ensa	2.98073	-0.79038	0.128706	0.716443	Promoter (<=1kb)	95625038	95625437	3	95625026	95627534	2509	1	56205	ENSMUST00000197050.1	12	ENSMUSG00000038619	endosulfine alpha
Chst3	1.72268	-1.16725	0.12879	0.716443	Promoter (<=1kb)	60218605	60219004	10	60181532	60219260	37729	2	53374	ENSMUST00000135158.8	256	ENSMUSG00000057337	carbohydrate sulfotransferase 3
Syde2	3.33524	0.768251	0.129048	0.717234	Promoter (<=1kb)	145988407	145988806	3	145988653	146021720	33068	1	214804	ENSMUST00000200546.1	0	ENSMUSG00000036863	synapse defective 1, Rho GTPase, homolog 2 (C. elegans)
Spring1	1.56915	-1.23034	0.129392	0.71844	Distal Intergenic	118271925	118272324	5	118245227	118266093	20867	1	76792	ENSMUST00000049138.7	26698	ENSMUSG00000032840	SREBF pathway regulator in golgi 1
Sh3gl2	3.62991	0.699262	0.129499	0.71844	Promoter (<=1kb)	85205660	85206059	4	85205535	85377691	172157	1	20404	ENSMUST00000107184.7	125	ENSMUSG00000028488	SH3-domain GRB2-like 2
Mapk8ip1	0.895532	2.07522	0.129748	0.718542	Promoter (<=1kb)	92400143	92400542	2	92383680	92401263	17584	2	19099	ENSMUST00000050312.2	721	ENSMUSG00000027223	mitogen-activated protein kinase 8 interacting protein 1
Slc2a3	2.71787	0.936753	0.129751	0.718542	Promoter (<=1kb)	122743489	122743888	6	122739892	122742920	3029	2	20527	ENSMUST00000168801.1	-569	ENSMUSG00000003153	solute carrier family 2 (facilitated glucose transporter), member 3
Fzd6	1.7212	1.40288	0.129952	0.718577	Distal Intergenic	38974827	38975226	15	39006034	39038188	32155	1	14368	ENSMUST00000179165.8	-30808	ENSMUSG00000022297	frizzled class receptor 6
Sv2b	5.15181	0.372953	0.130061	0.718577	Promoter (<=1kb)	75308797	75309196	7	75114894	75309262	194369	2	64176	ENSMUST00000165175.7	66	ENSMUSG00000053025	synaptic vesicle glycoprotein 2 b
Spdya	0.878191	2.0567	0.130258	0.718577	Promoter (<=1kb)	71552966	71553365	17	71552072	71589533	37462	1	70891	ENSMUST00000064420.11	894	ENSMUSG00000052525	speedy/RINGO cell cycle regulator family, member A
Fam90a1b	0.890713	2.07041	0.130313	0.718577	Exon (ENSMUST00000113538.2/ENSMUST00000113538.2, exon 1 of 1)	94331550	94331949	20	94339903	94364570	24668	2	631145	ENSMUST00000239046.1	32621	ENSMUSG00000043549	family with sequence similarity 90, member A1B
Runx1t1	2.41076	1.04719	0.130342	0.718577	Promoter (<=1kb)	13750609	13751008	4	13751297	13843027	91731	1	12395	ENSMUST00000150583.7	-289	ENSMUSG00000006586	RUNX1 translocation partner 1
Cyfip2	0.880099	2.05891	0.13072	0.719369	Promoter (<=1kb)	46311163	46311562	11	46291577	46312220	20644	2	76884	ENSMUST00000129474.1	658	ENSMUSG00000020340	cytoplasmic FMR1 interacting protein 2
Acvr1c	0.880099	2.05891	0.13072	0.719369	Intron (ENSMUST00000145495.7/11477, intron 10 of 10)	58426109	58426508	2	58267453	58357895	90443	2	269275	ENSMUST00000028178.13	-68214	ENSMUSG00000026834	activin A receptor, type IC
Srcin1	1.98678	1.24842	0.131015	0.720051	Promoter (2-3kb)	97571226	97571625	11	97534887	97573929	39043	2	56013	ENSMUST00000126287.1	2304	ENSMUSG00000038453	SRC kinase signaling inhibitor 1
Itpkb	5.52587	0.344401	0.131078	0.720051	Promoter (1-2kb)	180332105	180332504	1	180330485	180424802	94318	1	320404	ENSMUST00000070181.6	1620	ENSMUSG00000038855	inositol 1,4,5-trisphosphate 3-kinase B
Ptpn5	2.85431	0.89293	0.131299	0.720622	Promoter (<=1kb)	47132507	47132906	7	47077798	47132717	54920	2	19259	ENSMUST00000033142.12	0	ENSMUSG00000030854	protein tyrosine phosphatase, non-receptor type 5
Alx4	2.91525	-0.780835	0.13167	0.721758	Distal Intergenic	93619255	93619654	2	93642384	93681339	38956	1	11695	ENSMUST00000042078.9	-22730	ENSMUSG00000040310	aristaless-like homeobox 4
Cd248	4.90431	0.401054	0.13178	0.721758	Promoter (<=1kb)	5068475	5068874	19	5068078	5070682	2605	1	70445	ENSMUST00000070630.7	397	ENSMUSG00000056481	CD248 antigen, endosialin
Limk1	2.46132	-0.890162	0.131858	0.721758	Promoter (<=1kb)	134688616	134689015	5	134656039	134688598	32560	2	16885	ENSMUST00000015137.9	-18	ENSMUSG00000029674	LIM-domain containing, protein kinase
Ngf	3.38649	0.751215	0.132175	0.722029	Promoter (<=1kb)	102470072	102470471	3	102469928	102521013	51086	1	18049	ENSMUST00000106925.8	144	ENSMUSG00000027859	nerve growth factor
A930004D18Rik	3.22938	-0.714288	0.132234	0.722029	Promoter (4-5kb)	18033096	18033495	2	18027974	18028871	898	2	77940	ENSMUST00000151857.1	-4225	ENSMUSG00000054057	RIKEN cDNA A930004D18 gene
Mir7235	3.08319	0.822934	0.13226	0.722029	Exon (ENSMUST00000066078.11/73174, exon 7 of 9)	97139078	97139477	11	97146364	97146419	56	2	102466822	ENSMUST00000183796.1	6942	ENSMUSG00000099286	microRNA 7235
Camk2n1	0.86947	2.04738	0.132403	0.722166	Distal Intergenic	138466091	138466490	4	138454314	138460123	5810	1	66259	ENSMUST00000050918.3	11777	ENSMUSG00000046447	calcium/calmodulin-dependent protein kinase II inhibitor 1
Hpcal4	4.1235	-0.520807	0.132556	0.72226	Promoter (<=1kb)	123182756	123183155	4	123183227	123194701	11475	1	170638	ENSMUST00000059667.8	-72	ENSMUSG00000046093	hippocalcin-like 4
Sorbs3	3.28784	0.775579	0.132737	0.72226	Exon (ENSMUST00000227653.1/20410, exon 12 of 21)	70191851	70192250	14	70180932	70204623	23692	2	20410	ENSMUST00000227259.1	12373	ENSMUSG00000022091	sorbin and SH3 domain containing 3
Skor2	8.95425	-0.266596	0.132773	0.72226	Promoter (3-4kb)	76859763	76860162	18	76856405	76900342	43938	1	664805	ENSMUST00000166956.1	3358	ENSMUSG00000091519	SKI family transcriptional corepressor 2
Rapgefl1	2.70721	0.928906	0.133172	0.723521	Promoter (<=1kb)	98837391	98837790	11	98836785	98853697	16913	1	268480	ENSMUST00000107479.2	606	ENSMUSG00000038020	Rap guanine nucleotide exchange factor (GEF)-like 1
Dab1	5.66952	0.332884	0.13324	0.723521	Promoter (<=1kb)	103619592	103619991	4	103619665	104680382	1060718	1	13131	ENSMUST00000106827.7	0	ENSMUSG00000028519	disabled 1
Hes7	3.07213	-0.741417	0.133522	0.72419	Promoter (<=1kb)	69121114	69121513	11	69120404	69124055	3652	1	84653	ENSMUST00000024543.2	710	ENSMUSG00000023781	hes family bHLH transcription factor 7
Bicdl2	3.84004	0.634663	0.133599	0.72419	Promoter (<=1kb)	23660721	23661120	17	23660506	23668621	8116	1	212733	ENSMUST00000062967.9	215	ENSMUSG00000043782	BICD family like cargo adaptor 2
Rasgrf2	2.33029	-0.928894	0.134088	0.725929	Promoter (<=1kb)	92131668	92132067	13	92028496	92131656	103161	2	19418	ENSMUST00000146492.2	-12	ENSMUSG00000021708	RAS protein-specific guanine nucleotide-releasing factor 2
Pdzrn3	1.96445	-1.06642	0.134156	0.725929	Promoter (<=1kb)	101377215	101377614	6	101179878	101377342	197465	2	55983	ENSMUST00000151175.2	0	ENSMUSG00000035357	PDZ domain containing RING finger 3
Gm29683	5.31423	0.353786	0.134474	0.72606	Distal Intergenic	70168316	70168715	7	70178868	70337822	158955	2	624549	ENSMUST00000208511.1	169107	ENSMUSG00000109097	predicted gene, 29683
Ttc22	3.5848	0.696219	0.13455	0.72606	Promoter (<=1kb)	106622767	106623166	4	106622432	106640189	17758	1	230576	ENSMUST00000047922.2	335	ENSMUSG00000034919	tetratricopeptide repeat domain 22
Dtx1	2.43283	-0.888411	0.134708	0.72606	Promoter (<=1kb)	120711248	120711647	5	120680202	120711927	31726	2	14357	ENSMUST00000031607.6	280	ENSMUSG00000029603	deltex 1, E3 ubiquitin ligase
Pde9a	0.837039	2.03862	0.134803	0.72606	Promoter (<=1kb)	31386187	31386586	17	31386210	31476310	90101	1	18585	ENSMUST00000047168.12	0	ENSMUSG00000041119	phosphodiesterase 9A
Gm27162	1.35586	1.61893	0.135177	0.72606	Intron (ENSMUST00000184476.1/ENSMUST00000184476.1, intron 1 of 2)	33059447	33059846	9	32904937	32928966	24030	2	330917	ENSMUST00000185169.1	-130481	NA	predicted gene 27162
Mamstr	3.23467	-0.703889	0.135201	0.72606	Promoter (<=1kb)	45643483	45643882	7	45644384	45645009	626	1	74490	ENSMUST00000210169.1	-502	ENSMUSG00000042918	MEF2 activating motif and SAP domain containing transcriptional regulator
Tmem191c	3.69075	-0.611286	0.135301	0.72606	Promoter (<=1kb)	17277390	17277789	16	17277552	17281982	4431	1	224019	ENSMUST00000232364.1	0	ENSMUSG00000055692	transmembrane protein 191C
4933404K08Rik	3.17567	0.793627	0.135314	0.72606	Intron (ENSMUST00000155432.1/75322, intron 1 of 1)	23286373	23286772	13	23278350	23282267	3918	1	74061	ENSMUST00000156977.1	8023	ENSMUSG00000085122	RIKEN cDNA 4933404K08 gene
Eml2	4.64498	-0.417388	0.135356	0.72606	Promoter (<=1kb)	19176716	19177115	7	19176421	19206257	29837	1	72205	ENSMUST00000117338.7	295	ENSMUSG00000040811	echinoderm microtubule associated protein like 2
Prox1	0	3.24638	0.135361	0.72606	Intron (ENSMUST00000175916.7/19130, intron 4 of 4)	190132569	190132968	1	190122453	190169399	46947	2	19130	ENSMUST00000010319.13	36431	ENSMUSG00000010175	prospero homeobox 1
Emx2	7.01544	-0.312345	0.135895	0.727504	Intron (ENSMUST00000136990.2/329078, intron 1 of 3)	59451655	59452054	19	59458372	59465357	6986	1	13797	ENSMUST00000062216.3	-6318	ENSMUSG00000043969	empty spiracles homeobox 2
Aagab	1.96677	1.2425	0.135914	0.727504	Promoter (3-4kb)	63613289	63613688	9	63616988	63640328	23341	1	66939	ENSMUST00000213880.1	-3300	ENSMUSG00000037257	alpha- and gamma-adaptin binding protein
Adam15	3.54364	-0.643213	0.135985	0.727504	Promoter (<=1kb)	89349789	89350188	3	89338542	89349982	11441	2	11490	ENSMUST00000184651.7	0	ENSMUSG00000028041	a disintegrin and metallopeptidase domain 15 (metargidin)
Rassf3	3.446	0.726038	0.136208	0.728059	Promoter (<=1kb)	121475425	121475824	10	121410350	121476347	65998	2	192678	ENSMUST00000026902.8	523	ENSMUSG00000025795	Ras association (RalGDS/AF-6) domain family member 3
1700108J01Rik	0	3.22576	0.136542	0.729212	Promoter (4-5kb)	122238472	122238871	14	122229905	122233654	3750	2	68245	ENSMUST00000187423.1	-4818	ENSMUSG00000100585	RIKEN cDNA 1700108J01 gene
Usp22	3.52101	-0.648869	0.136727	0.729567	Promoter (<=1kb)	61175066	61175465	11	61151785	61175055	23271	2	216825	ENSMUST00000041683.8	-11	ENSMUSG00000042506	ubiquitin specific peptidase 22
Clstn1	3.8186	-0.581934	0.13759	0.732934	Promoter (<=1kb)	149587217	149587616	4	149587248	149627325	40078	1	65945	ENSMUST00000137232.1	0	ENSMUSG00000039953	calsyntenin 1
Ptprt	5.35041	0.347801	0.13764	0.732934	Promoter (<=1kb)	162660393	162660792	2	161526357	162661094	1134738	2	19281	ENSMUST00000109442.7	302	ENSMUSG00000053141	protein tyrosine phosphatase, receptor type, T
Kcnk3	5.04104	-0.35786	0.137716	0.732934	Promoter (1-2kb)	30622433	30622832	5	30621373	30622232	860	1	16527	ENSMUST00000197428.1	1060	ENSMUSG00000049265	potassium channel, subfamily K, member 3
Fstl4	5.03874	-0.357825	0.137867	0.733105	Promoter (<=1kb)	52764932	52765331	11	52764634	53188538	423905	1	320027	ENSMUST00000036796.7	298	ENSMUSG00000036264	follistatin-like 4
Arhgef4	3.18226	0.785131	0.138098	0.733268	Promoter (<=1kb)	34678191	34678590	1	34678188	34812739	134552	1	226970	ENSMUST00000159747.8	3	ENSMUSG00000037509	Rho guanine nucleotide exchange factor (GEF) 4
Sim1	5.93204	0.325765	0.138136	0.733268	Intron (ENSMUST00000020071.3/20464, intron 1 of 10)	50902197	50902596	10	50895651	50989152	93502	1	20464	ENSMUST00000020071.3	6546	ENSMUSG00000019913	single-minded family bHLH transcription factor 1
Kcns2	3.57328	0.706255	0.138352	0.733576	Promoter (<=1kb)	34837453	34837852	15	34837355	34843407	6053	1	16539	ENSMUST00000072868.4	98	ENSMUSG00000050963	K+ voltage-gated channel, subfamily S, 2
Ccne1	2.9631	0.839656	0.138605	0.733576	Distal Intergenic	38085039	38085438	7	38098811	38099369	559	2	12447	ENSMUST00000137097.1	13931	ENSMUSG00000002068	cyclin E1
Olfm1	2.60048	0.970699	0.138832	0.733576	Promoter (<=1kb)	28206434	28206833	2	28205659	28230736	25078	1	56177	ENSMUST00000028177.10	775	ENSMUSG00000026833	olfactomedin 1
Ccdc60	1.37968	1.60146	0.138974	0.733576	Intron (ENSMUST00000050178.12/269693, intron 1 of 13)	116271736	116272135	5	116169225	116288963	119739	2	269693	ENSMUST00000086483.3	16828	ENSMUSG00000043913	coiled-coil domain containing 60
Foxp2	2.69044	0.915665	0.139048	0.733576	Promoter (1-2kb)	14899473	14899872	6	14901349	15441977	540629	1	114142	ENSMUST00000115477.7	-1477	ENSMUSG00000029563	forkhead box P2
Slit1	0	3.2007	0.139158	0.733576	Intron (ENSMUST00000169141.7/20562, intron 4 of 35)	41662219	41662618	19	41604369	41608530	4162	2	20562	ENSMUST00000169416.1	-53689	ENSMUSG00000025020	slit guidance ligand 1
Sema6c	2.59688	-0.839882	0.13924	0.733576	Promoter (<=1kb)	95160236	95160635	3	95160457	95164542	4086	1	20360	ENSMUST00000142306.1	0	ENSMUSG00000038777	sema domain, transmembrane domain (TM), and cytoplasmic domain, (semaphorin) 6C
Mir7673	0.828162	2.02921	0.139253	0.733576	Distal Intergenic	94318472	94318871	20	94274574	94274637	64	1	102466238	ENSMUST00000184567.1	43898	ENSMUSG00000099072	microRNA 7673
Plxna2	0	3.22138	0.139354	0.733576	Exon (ENSMUST00000027952.11/18845, exon 6 of 32)	194749176	194749575	1	194764567	194786628	22062	1	18845	ENSMUST00000135664.1	-14992	ENSMUSG00000026640	plexin A2
Prelid3a	2.13248	-0.983662	0.139587	0.733576	Promoter (<=1kb)	67464857	67465256	18	67464866	67479835	14970	1	225655	ENSMUST00000025411.8	0	ENSMUSG00000024530	PRELI domain containing 3A
Kdm4b	2.62365	-0.839134	0.139718	0.733576	Promoter (<=1kb)	56325661	56326060	17	56326062	56356056	29995	1	193796	ENSMUST00000139679.7	-2	ENSMUSG00000024201	lysine (K)-specific demethylase 4B
Camk1g	2.12803	-0.983834	0.139988	0.733576	Distal Intergenic	193433501	193433900	1	193346346	193370298	23953	2	215303	ENSMUST00000016323.10	-63203	ENSMUSG00000016179	calcium/calmodulin-dependent protein kinase I gamma
Arhgef15	3.93058	-0.550951	0.140145	0.733576	Promoter (<=1kb)	68954678	68955077	11	68943155	68955074	11920	2	442801	ENSMUST00000065040.12	0	ENSMUSG00000052921	Rho guanine nucleotide exchange factor (GEF) 15
4933406C10Rik	2.98914	-0.756951	0.140165	0.733576	Distal Intergenic	32897601	32898000	12	32924957	32953783	28827	2	74076	ENSMUST00000180391.1	55783	ENSMUSG00000097494	RIKEN cDNA 4933406C10 gene
Arhgef5	2.71009	0.912429	0.140524	0.733576	Promoter (<=1kb)	43265556	43265955	6	43265582	43289320	23739	1	54324	ENSMUST00000031750.13	0	ENSMUSG00000033542	Rho guanine nucleotide exchange factor (GEF) 5
Zfx	1.97563	1.23523	0.140591	0.733576	Promoter (2-3kb)	94126536	94126935	20	94098672	94123702	25031	2	22764	ENSMUST00000135661.1	-2834	ENSMUSG00000079509	zinc finger protein X-linked
Cactin	3.81285	-0.579902	0.140637	0.733576	Promoter (<=1kb)	81320547	81320946	10	81321103	81326242	5140	1	70312	ENSMUST00000050867.7	-157	ENSMUSG00000034889	cactin, spliceosome C complex subunit
Tcerg1	2.76447	-0.802729	0.140658	0.733576	Promoter (<=1kb)	42511207	42511606	18	42511487	42575793	64307	1	56070	ENSMUST00000237602.1	0	ENSMUSG00000024498	transcription elongation regulator 1 (CA150)
Wdr86	6.02245	0.322963	0.140976	0.733576	Promoter (<=1kb)	24730459	24730858	5	24711738	24730727	18990	2	269633	ENSMUST00000068693.11	0	ENSMUSG00000055235	WD repeat domain 86
Mir1966	3.71479	0.650216	0.140982	0.733576	Promoter (1-2kb)	105613579	105613978	8	105615466	105615573	108	1	100316712	ENSMUST00000158807.1	-1488	ENSMUSG00000089432	microRNA 1966
BC055402	1.98141	1.22681	0.141081	0.733576	Distal Intergenic	57171162	57171561	1	57200645	57214993	14349	2	407809	ENSMUST00000190488.1	43432	ENSMUSG00000101429	cDNA sequence BC055402
Cdc42ep3	1.69072	1.3826	0.141166	0.733576	Promoter (<=1kb)	79355263	79355662	17	79333727	79355091	21365	2	260409	ENSMUST00000068958.8	-172	ENSMUSG00000036533	CDC42 effector protein (Rho GTPase binding) 3
Nxph1	5.99027	0.321963	0.141334	0.733576	Promoter (<=1kb)	8949350	8949749	6	8949676	9249030	299355	1	18231	ENSMUST00000060369.3	0	ENSMUSG00000046178	neurexophilin 1
Zfhx3	2.02067	-1.02163	0.141398	0.733576	Promoter (1-2kb)	107944554	107944953	8	107942644	108961630	1018987	1	11906	ENSMUST00000220518.1	1910	ENSMUSG00000038872	zinc finger homeobox 3
Tmem178b	1.33417	1.61534	0.141495	0.733576	Promoter (<=1kb)	39872571	39872970	6	39873071	40255075	382005	1	434008	ENSMUST00000180886.2	-101	ENSMUSG00000057716	transmembrane protein 178B
Prokr2	3.10953	-0.720751	0.14169	0.733576	Promoter (<=1kb)	132384566	132384965	2	132370329	132385400	15072	2	246313	ENSMUST00000049997.13	435	ENSMUSG00000050558	prokineticin receptor 2
Rora	2.36617	1.02793	0.142131	0.733576	Intron (ENSMUST00000034766.13/19883, intron 1 of 10)	69099591	69099990	9	69195541	69250834	55294	1	19883	ENSMUST00000132355.1	-95551	ENSMUSG00000032238	RAR-related orphan receptor alpha
Slc44a5	2.37288	-0.900213	0.142296	0.733576	Promoter (<=1kb)	153973607	153974006	3	153973436	154271722	298287	1	242259	ENSMUST00000089948.5	171	ENSMUSG00000028360	solute carrier family 44, member 5
Timp3	1.3434	1.60767	0.142318	0.733576	Promoter (<=1kb)	86301023	86301422	10	86300556	86326834	26279	1	21859	ENSMUST00000136045.1	467	ENSMUSG00000020044	tissue inhibitor of metalloproteinase 3
4833428L15Rik	5.22857	-0.339105	0.142329	0.733576	Promoter (<=1kb)	45430824	45431223	9	45416626	45431232	14607	2	74602	ENSMUST00000181230.1	9	ENSMUSG00000097074	RIKEN cDNA 4833428L15 gene
Fbxo32	3.18119	0.776821	0.142555	0.733576	Promoter (<=1kb)	58214195	58214594	15	58175879	58214932	39054	2	67731	ENSMUST00000022986.7	338	ENSMUSG00000022358	F-box protein 32
Gm13283	0	3.1799	0.142631	0.733576	Promoter (<=1kb)	88759128	88759527	4	88760119	88761581	1463	1	545645	ENSMUST00000191112.1	-592	ENSMUSG00000100505	predicted gene 13283
Slc16a2	0	3.1799	0.142631	0.733576	Distal Intergenic	103848303	103848702	20	103697414	103821983	124570	2	20502	ENSMUST00000042664.9	-26320	ENSMUSG00000033965	solute carrier family 16 (monocarboxylic acid transporters), member 2
Epas1	7.40467	0.303979	0.142803	0.733576	Promoter (<=1kb)	86754648	86755047	17	86753700	86833410	79711	1	13819	ENSMUST00000024954.10	948	ENSMUSG00000024140	endothelial PAS domain protein 1
Eif4g3	0	3.17569	0.14306	0.733576	Distal Intergenic	137985565	137985964	4	137993022	138105419	112398	1	230861	ENSMUST00000139759.7	-7058	ENSMUSG00000028760	eukaryotic translation initiation factor 4 gamma, 3
Sh3bgrl3	1.39124	-1.2693	0.143387	0.733576	Promoter (<=1kb)	134128623	134129022	4	134127406	134128789	1384	2	73723	ENSMUST00000030651.8	0	ENSMUSG00000028843	SH3 domain binding glutamic acid-rich protein-like 3
Mtx2	2.37057	1.0249	0.143723	0.733576	Distal Intergenic	74964358	74964757	2	74868981	74876504	7524	1	53375	ENSMUST00000129284.1	95377	ENSMUSG00000027099	metaxin 2
Nav2	3.17885	0.776396	0.143816	0.733576	Intron (ENSMUST00000183659.7/78286, intron 12 of 39)	49522410	49522809	7	49548192	49556996	8805	1	78286	ENSMUST00000184109.1	-25383	ENSMUSG00000052512	neuron navigator 2
Ccdc142	2.38805	-0.889414	0.143833	0.733576	Promoter (<=1kb)	83102010	83102409	6	83101617	83109939	8323	1	243510	ENSMUST00000101253.5	393	ENSMUSG00000107499	coiled-coil domain containing 142
BC107364	6.32866	0.317758	0.143882	0.733576	Intron (ENSMUST00000093126.10/329716, intron 3 of 4)	96435778	96436177	3	96433788	96452306	18519	2	329716	ENSMUST00000093126.10	16129	ENSMUSG00000046317	cDNA sequence BC107364
Arhgap35	3.21026	-0.699196	0.144012	0.733576	Promoter (<=1kb)	16615123	16615522	7	16493719	16614993	121275	2	232906	ENSMUST00000075845.10	-130	ENSMUSG00000058230	Rho GTPase activating protein 35
Tango2	2.35734	-0.893213	0.14402	0.733576	Promoter (<=1kb)	18343830	18344229	16	18300827	18344042	43216	2	27883	ENSMUST00000115628.9	0	ENSMUSG00000013539	transport and golgi organization 2
Trim63	0.830518	2.00532	0.14406	0.733576	Distal Intergenic	134307632	134308031	4	134315120	134329629	14510	1	433766	ENSMUST00000105875.7	-7089	ENSMUSG00000028834	tripartite motif-containing 63
Sigirr	4.63273	0.439439	0.144124	0.733576	Promoter (<=1kb)	141100101	141100500	7	141091175	141100524	9350	2	24058	ENSMUST00000210167.1	24	ENSMUSG00000025494	single immunoglobulin and toll-interleukin 1 receptor (TIR) domain
Ralgapa2	2.94066	-0.759137	0.144137	0.733576	Promoter (<=1kb)	146511858	146512257	2	146239879	146512004	272126	2	241694	ENSMUST00000109986.8	0	ENSMUSG00000037110	Ral GTPase activating protein, alpha subunit 2 (catalytic)
Selenom	1.69311	-1.14883	0.144161	0.733576	Promoter (1-2kb)	3516211	3516610	11	3514867	3517351	2485	1	114679	ENSMUST00000094469.4	1344	ENSMUSG00000075702	selenoprotein M
Tspo	1.94189	1.22406	0.144229	0.733576	Promoter (<=1kb)	83563557	83563956	15	83563592	83574203	10612	1	12257	ENSMUST00000047419.7	0	ENSMUSG00000041736	translocator protein
Zfhx3	0	3.15485	0.144286	0.733576	Intron (ENSMUST00000220518.1/11906, intron 1 of 15)	108086102	108086501	8	107942644	108961630	1018987	1	11906	ENSMUST00000220518.1	143458	ENSMUSG00000038872	zinc finger homeobox 3
Ets1	2.95932	0.827318	0.144373	0.733576	Promoter (1-2kb)	32637447	32637846	9	32636248	32754994	118747	1	23871	ENSMUST00000238819.1	1199	ENSMUSG00000032035	E26 avian leukemia oncogene 1, 5' domain
Fam222a	1.71719	1.35764	0.144452	0.733576	Promoter (3-4kb)	114571222	114571621	5	114568017	114594678	26662	1	433940	ENSMUST00000130983.1	3205	ENSMUSG00000041930	family with sequence similarity 222, member A
Bmp7	1.40919	-1.27128	0.144506	0.733576	Distal Intergenic	172765963	172766362	2	172916118	172940092	23975	2	12162	ENSMUST00000137247.1	173730	ENSMUSG00000008999	bone morphogenetic protein 7
Tmem37	2.36382	1.02025	0.144584	0.733576	Promoter (<=1kb)	120073737	120074136	1	120067377	120074074	6698	2	170706	ENSMUST00000056089.7	0	ENSMUSG00000050777	transmembrane protein 37
Sorcs3	3.66584	-0.609001	0.14464	0.733576	Promoter (<=1kb)	48206151	48206550	19	48206025	48805505	599481	1	66673	ENSMUST00000078880.5	126	ENSMUSG00000063434	sortilin-related VPS10 domain containing receptor 3
Sntb1	2.17786	1.09989	0.144666	0.733576	Promoter (<=1kb)	55906340	55906739	15	55790964	55906722	115759	2	20649	ENSMUST00000110200.2	0	ENSMUSG00000060429	syntrophin, basic 1
Gm14204	1.32098	1.59736	0.144758	0.733576	Exon (ENSMUST00000123944.1/100045469, exon 3 of 3)	158602120	158602519	2	158603188	158610590	7403	2	100045469	ENSMUST00000155319.1	8071	ENSMUSG00000086496	predicted gene 14204
Plpp4	1.67998	1.3682	0.145042	0.733869	Distal Intergenic	129403217	129403616	7	129257055	129391019	133965	1	381925	ENSMUST00000205896.1	146162	ENSMUSG00000070366	phospholipid phosphatase 4
Hdlbp	2.25565	-0.924271	0.145055	0.733869	Promoter (<=1kb)	93478257	93478656	1	93440688	93478377	37690	2	110611	ENSMUST00000188165.1	0	ENSMUSG00000034088	high density lipoprotein (HDL) binding protein
Prdm16	1.66046	-1.14941	0.145246	0.734235	Intron (ENSMUST00000030902.12/70673, intron 3 of 16)	154463987	154464386	4	154476469	154528765	52297	2	70673	ENSMUST00000135064.1	64379	ENSMUSG00000039410	PR domain containing 16
Bmp8a	5.77207	0.32046	0.145533	0.734583	Promoter (<=1kb)	123342225	123342624	4	123312645	123342803	30159	2	12163	ENSMUST00000102641.9	179	ENSMUSG00000032726	bone morphogenetic protein 8a
Cldn23	4.79562	0.403114	0.145588	0.734583	Promoter (<=1kb)	35825644	35826043	8	35824712	35826559	1848	2	71908	ENSMUST00000060128.6	516	ENSMUSG00000055976	claudin 23
St14	5.82586	0.317638	0.145827	0.734583	Promoter (<=1kb)	31131133	31131532	9	31106144	31131727	25584	2	19143	ENSMUST00000214418.1	195	ENSMUSG00000031995	suppression of tumorigenicity 14 (colon carcinoma)
Dock8	4.77856	0.411437	0.145838	0.734583	Promoter (<=1kb)	24999731	25000130	19	24999544	25067106	67563	1	76088	ENSMUST00000235722.1	187	ENSMUSG00000052085	dedicator of cytokinesis 8
Ptgfr	2.37503	1.0171	0.145992	0.734583	Promoter (<=1kb)	151837322	151837721	3	151796502	151837630	41129	2	19220	ENSMUST00000029670.6	0	ENSMUSG00000028036	prostaglandin F receptor
Snx20	1.99063	-1.01198	0.146032	0.734583	Downstream (<1kb)	88625165	88625564	8	88626563	88636128	9566	2	71607	ENSMUST00000034087.8	10564	ENSMUSG00000031662	sorting nexin 20
Cd247	3.99628	0.575826	0.146248	0.734961	Intron (ENSMUST00000161971.7/12503, intron 1 of 7)	165840857	165841256	1	165858216	165861555	3340	1	12503	ENSMUST00000159070.2	-16960	ENSMUSG00000005763	CD247 antigen
Cdh1	6.07665	0.316573	0.146346	0.734961	Promoter (<=1kb)	106603531	106603930	8	106603379	106669362	65984	1	12550	ENSMUST00000167688.1	152	ENSMUSG00000000303	cadherin 1
Grhl1	2.17602	1.09864	0.146522	0.735242	Promoter (<=1kb)	24572179	24572578	12	24572283	24617388	45106	1	195733	ENSMUST00000085553.12	0	ENSMUSG00000020656	grainyhead like transcription factor 1
Luzp2	1.33012	1.59273	0.146897	0.735511	Distal Intergenic	54783343	54783742	7	54835498	55250089	414592	1	233271	ENSMUST00000206923.1	-51756	ENSMUSG00000063297	leucine zipper protein 2
Phf2	2.15887	1.10179	0.146959	0.735511	Intron (ENSMUST00000035540.8/18676, intron 17 of 21)	48808421	48808820	13	48801750	48871119	69370	2	18676	ENSMUST00000035540.8	62299	ENSMUSG00000038025	PHD finger protein 2
Dbx1	4.13766	0.53851	0.147202	0.735511	Distal Intergenic	49686754	49687153	7	49631499	49636849	5351	2	13172	ENSMUST00000032717.6	-49905	ENSMUSG00000030507	developing brain homeobox 1
Ptgis	3.55069	0.687869	0.147221	0.735511	Promoter (<=1kb)	167240576	167240975	2	167191805	167240589	48785	2	19223	ENSMUST00000088041.10	0	ENSMUSG00000017969	prostaglandin I2 (prostacyclin) synthase
9530059O14Rik	3.84359	0.612518	0.147251	0.735511	Intron (ENSMUST00000181682.8/319626, intron 2 of 3)	122595353	122595752	9	122572502	122679596	107095	1	319626	ENSMUST00000181719.1	22851	ENSMUSG00000097736	RIKEN cDNA 9530059O14 gene
Sf1	2.71894	-0.809546	0.147294	0.735511	Promoter (<=1kb)	6363430	6363829	19	6363690	6378030	14341	1	22668	ENSMUST00000131252.7	0	ENSMUSG00000024949	splicing factor 1
Lmntd1	0	3.12987	0.147965	0.737803	Promoter (3-4kb)	145454346	145454745	6	145393459	145450767	57309	2	74071	ENSMUST00000111706.7	-3579	ENSMUSG00000054966	lamin tail domain containing 1
Ly6g6c	3.14141	0.77211	0.147993	0.737803	Promoter (<=1kb)	35065098	35065497	17	35065388	35069625	4238	1	68468	ENSMUST00000173207.7	0	ENSMUSG00000092586	lymphocyte antigen 6 complex, locus G6C
Nrg1	2.46079	-0.856109	0.14815	0.73799	Promoter (<=1kb)	31917520	31917919	8	31819175	31917650	98476	2	211323	ENSMUST00000208335.1	0	ENSMUSG00000062991	neuregulin 1
Tinagl1	3.13144	0.778805	0.148849	0.74087	Promoter (<=1kb)	130173917	130174316	4	130169113	130174691	5579	2	94242	ENSMUST00000132545.2	375	ENSMUSG00000028776	tubulointerstitial nephritis antigen-like 1
Rtp4	2.86706	-0.759143	0.149866	0.741479	Intron (ENSMUST00000209422.1/67775, intron 2 of 3)	23595861	23596260	16	23601742	23613150	11409	1	67775	ENSMUST00000211569.1	-5482	ENSMUSG00000033355	receptor transporter protein 4
Atp2b2	1.38919	-1.2505	0.149929	0.741479	Promoter (<=1kb)	114041649	114042048	6	113743831	114042026	298196	2	11941	ENSMUST00000101045.9	0	ENSMUSG00000030302	ATPase, Ca++ transporting, plasma membrane 2
Mrm1	1.69154	-1.1336	0.149935	0.741479	Distal Intergenic	84794703	84795102	11	84814743	84815390	648	2	217038	ENSMUST00000144104.1	20288	ENSMUSG00000018405	mitochondrial rRNA methyltransferase 1
Sox1	1.20384	-1.34809	0.149997	0.741479	Promoter (1-2kb)	12393709	12394108	8	12395295	12400126	4832	1	20664	ENSMUST00000180353.1	-1187	ENSMUSG00000096014	SRY (sex determining region Y)-box 1
4933400F21Rik	2.1736	1.08636	0.150008	0.741479	Intron (ENSMUST00000027521.14/347722, intron 6 of 17)	89646003	89646402	1	89681085	89683888	2804	2	74403	ENSMUST00000187011.1	37486	NA	RIKEN cDNA 4933400F21 gene
Hey1	2.1736	1.08636	0.150008	0.741479	Distal Intergenic	8766478	8766877	3	8663359	8667256	3898	2	15213	ENSMUST00000042412.4	-99222	ENSMUSG00000040289	hairy/enhancer-of-split related with YRPW motif 1
Kcp	1.9506	1.20193	0.15007	0.741479	Promoter (<=1kb)	29484150	29484549	6	29473162	29484094	10933	2	333088	ENSMUST00000159482.8	-56	ENSMUSG00000059022	kielin/chordin-like protein
Nhlh1	4.60157	0.433219	0.15027	0.741479	Promoter (3-4kb)	172053803	172054202	1	172052292	172057573	5282	2	18071	ENSMUST00000059794.3	3371	ENSMUSG00000051251	nescient helix loop helix 1
Fitm2	1.41085	-1.24446	0.150357	0.741479	Distal Intergenic	163482141	163482540	2	163466379	163472629	6251	2	228859	ENSMUST00000109418.1	-9512	ENSMUSG00000048486	fat storage-inducing transmembrane protein 2
Inhba	1.7028	1.34046	0.150558	0.741479	Promoter (2-3kb)	16016756	16017155	13	16014475	16027211	12737	1	16323	ENSMUST00000164993.1	2281	ENSMUSG00000041324	inhibin beta-A
Zfp703	3.3855	0.718407	0.150668	0.741479	Promoter (1-2kb)	26979196	26979595	8	26978185	26978692	508	1	353310	ENSMUST00000209411.1	1011	ENSMUSG00000085795	zinc finger protein 703
Nxph3	0	3.10888	0.150792	0.741479	Distal Intergenic	95537013	95537412	11	95509845	95514570	4726	2	104079	ENSMUST00000058866.7	-22443	ENSMUSG00000046719	neurexophilin 3
Dmbt1	0	3.10888	0.150792	0.741479	Promoter (<=1kb)	131107128	131107527	7	131108462	131121628	13167	1	12945	ENSMUST00000209015.2	-935	ENSMUSG00000047517	deleted in malignant brain tumors 1
Bst2	1.31566	1.57635	0.150815	0.741479	Promoter (<=1kb)	71536794	71537193	8	71535805	71537331	1527	2	69550	ENSMUST00000212386.1	138	ENSMUSG00000046718	bone marrow stromal cell antigen 2
Gm53	2.52998	0.946285	0.150852	0.741479	Distal Intergenic	96234955	96235354	11	96251105	96264484	13380	1	193022	ENSMUST00000129907.2	-15751	NA	predicted gene 53
Gm15934	3.96915	-0.530004	0.150925	0.741479	Promoter (<=1kb)	45289322	45289721	10	45287311	45289424	2114	2	102638854	ENSMUST00000162062.1	0	ENSMUSG00000090088	predicted gene 15934
Rgmb	1.64586	-1.13461	0.151022	0.741479	Promoter (<=1kb)	15830330	15830729	17	15820848	15830651	9804	2	68799	ENSMUST00000231281.1	0	ENSMUSG00000048027	repulsive guidance molecule family member B
Ror2	5.58689	0.322082	0.151388	0.741602	Promoter (<=1kb)	53285347	53285746	13	53109312	53285549	176238	2	26564	ENSMUST00000130235.7	0	ENSMUSG00000021464	receptor tyrosine kinase-like orphan receptor 2
Esrrg	8.03192	0.281151	0.151552	0.741602	Promoter (1-2kb)	187607016	187607415	1	187608791	188043502	434712	1	26381	ENSMUST00000127489.7	-1376	ENSMUSG00000026610	estrogen-related receptor gamma
Igfbp2	2.80576	0.856961	0.151777	0.741602	Promoter (<=1kb)	72825080	72825479	1	72825322	72852467	27146	1	16008	ENSMUST00000120564.1	0	ENSMUSG00000039323	insulin-like growth factor binding protein 2
Sertm1	3.02587	0.792294	0.151823	0.741602	Promoter (<=1kb)	54915440	54915839	3	54897071	54915887	18817	2	329641	ENSMUST00000070342.3	48	ENSMUSG00000056306	serine rich and transmembrane domain containing 1
Ttll6	1.94625	1.20157	0.152029	0.741602	Promoter (<=1kb)	96133304	96133703	11	96133786	96165451	31666	1	237930	ENSMUST00000167258.7	-83	ENSMUSG00000038756	tubulin tyrosine ligase-like family, member 6
Olig2	1.18038	-1.43906	0.152111	0.741602	Distal Intergenic	91241159	91241558	16	91225457	91228677	3221	1	50913	ENSMUST00000035608.9	15702	ENSMUSG00000039830	oligodendrocyte transcription factor 2
Gnas	5.76927	0.314305	0.152183	0.741602	Promoter (1-2kb)	174299442	174299841	2	174297859	174346744	48886	1	14683	ENSMUST00000087876.10	1583	ENSMUSG00000027523	GNAS (guanine nucleotide binding protein, alpha stimulating) complex locus
Col4a1	4.90898	-0.358959	0.15221	0.741602	Promoter (<=1kb)	11312913	11313312	8	11198423	11312826	114404	2	12826	ENSMUST00000033898.9	-87	ENSMUSG00000031502	collagen, type IV, alpha 1
Abca4	4.19337	0.527947	0.15238	0.741602	Promoter (<=1kb)	122043368	122043767	3	122044443	122180059	135617	1	11304	ENSMUST00000013995.12	-676	ENSMUSG00000028125	ATP-binding cassette, sub-family A (ABC1), member 4
Id1	1.98819	1.18536	0.152431	0.741602	Promoter (<=1kb)	152736517	152736916	2	152736251	152737410	1160	1	15901	ENSMUST00000109824.1	266	ENSMUSG00000042745	inhibitor of DNA binding 1, HLH protein
Sdsl	1.67431	-1.12546	0.15248	0.741602	Downstream (1-2kb)	120456616	120457015	5	120460688	120467360	6673	2	257635	ENSMUST00000132916.1	10345	ENSMUSG00000029596	serine dehydratase-like
Ptprg	1.97869	-0.998542	0.152722	0.741602	Promoter (<=1kb)	12189817	12190216	14	12189943	12238563	48621	1	19270	ENSMUST00000119888.1	0	ENSMUSG00000021745	protein tyrosine phosphatase, receptor type, G
Mid1	0.799625	2.0042	0.152789	0.741602	Intron (ENSMUST00000112107.7/17318, intron 2 of 9)	169950779	169951178	20	169972885	169983974	11090	1	17318	ENSMUST00000133857.7	-21707	ENSMUSG00000035299	midline 1
Sec61a1	2.24697	-0.906699	0.15293	0.741602	Exon (ENSMUST00000120933.4/74589, exon 6 of 6)	88546043	88546442	6	88503579	88518905	15327	2	53421	ENSMUST00000032168.6	-27138	ENSMUSG00000030082	Sec61 alpha 1 subunit (S. cerevisiae)
8430422H06Rik	6.61701	0.308567	0.153087	0.741602	Exon (ENSMUST00000234483.1/ENSMUST00000234483.1, exon 1 of 1)	14308442	14308841	18	14232309	14278542	46234	1	74529	ENSMUST00000234218.1	76133	ENSMUSG00000117633	RIKEN cDNA 8430422H06 gene
Pdik1l	1.30841	1.56812	0.153442	0.741602	Distal Intergenic	134292970	134293369	4	134275002	134287895	12894	2	230809	ENSMUST00000061234.13	-5075	ENSMUSG00000050890	PDLIM1 interacting kinase 1 like
Ppa2	0	3.08394	0.153499	0.741602	Exon (ENSMUST00000122334.7/74776, exon 12 of 12)	133378174	133378573	3	133348076	133378067	29992	1	74776	ENSMUST00000106315.3	30098	ENSMUSG00000028013	pyrophosphatase (inorganic) 2
Paqr9	3.24709	-0.673602	0.153545	0.741602	Promoter (<=1kb)	95559772	95560171	9	95559657	95568023	8367	1	75552	ENSMUST00000079597.6	115	ENSMUSG00000064225	progestin and adipoQ receptor family member IX
Gm13133	1.22999	-1.32446	0.153584	0.741602	Intron (ENSMUST00000030902.12/70673, intron 1 of 16)	154542418	154542817	4	154550282	154557645	7364	1	102634405	ENSMUST00000143888.1	-7465	ENSMUSG00000086565	predicted gene 13133
Naglu	2.33868	1.01209	0.153978	0.741602	Promoter (<=1kb)	101069972	101070371	11	101070012	101077672	7661	1	27419	ENSMUST00000001802.9	0	ENSMUSG00000001751	alpha-N-acetylglucosaminidase (Sanfilippo disease IIIB)
Pde1b	2.50197	-0.832418	0.154	0.741602	Promoter (<=1kb)	103502936	103503335	15	103503034	103530051	27018	1	18574	ENSMUST00000226468.1	0	ENSMUSG00000022489	phosphodiesterase 1B, Ca2+-calmodulin dependent
Cpxm2	4.49499	0.453873	0.154013	0.741602	Promoter (<=1kb)	132154442	132154841	7	132042816	132154739	111924	2	55987	ENSMUST00000033149.4	0	ENSMUSG00000030862	carboxypeptidase X 2 (M14 family)
Sel1l3	1.32503	1.56863	0.154126	0.741602	Intron (ENSMUST00000031090.7/231238, intron 14 of 23)	53138795	53139194	5	53155595	53173112	17518	2	231238	ENSMUST00000196550.1	33918	ENSMUSG00000029189	sel-1 suppressor of lin-12-like 3 (C. elegans)
Lurap1	1.92306	1.191	0.154426	0.741602	Promoter (<=1kb)	116143733	116144132	4	116132406	116144609	12204	2	68075	ENSMUST00000030469.4	477	ENSMUSG00000028701	leucine rich adaptor protein 1
Prrg4	2.35239	1.00256	0.154427	0.741602	Promoter (<=1kb)	104849501	104849900	2	104830741	104849876	19136	2	228413	ENSMUST00000028593.10	0	ENSMUSG00000027171	proline rich Gla (G-carboxyglutamic acid) 4 (transmembrane)
Lyl1	5.62666	0.321434	0.154429	0.741602	Promoter (4-5kb)	84705855	84706254	8	84701781	84704155	2375	1	17095	ENSMUST00000238338.1	4074	ENSMUSG00000034041	lymphoblastomic leukemia 1
Zfp575	1.86045	-1.04418	0.154469	0.741602	Exon (ENSMUST00000077191.6/66071, exon 4 of 8)	24594944	24595343	7	24583838	24587641	3804	2	101544	ENSMUST00000094705.2	-7303	ENSMUSG00000066721	zinc finger protein 575
Smad3	2.44507	-0.847994	0.154478	0.741602	Distal Intergenic	63843919	63844318	9	63646767	63757994	111228	2	17127	ENSMUST00000034973.9	-85925	ENSMUSG00000032402	SMAD family member 3
Nav2	3.06442	0.782257	0.154573	0.741602	Intron (ENSMUST00000184336.1/78286, intron 3 of 4)	48918282	48918681	7	48908716	48963824	55109	1	78286	ENSMUST00000184336.1	9566	ENSMUSG00000052512	neuron navigator 2
Mal	5.47451	0.325268	0.154721	0.741602	Promoter (<=1kb)	127656236	127656635	2	127634874	127656219	21346	2	17153	ENSMUST00000028853.6	-17	ENSMUSG00000027375	myelin and lymphocyte protein, T cell differentiation protein
Cacna1h	5.65606	0.318313	0.154787	0.741602	Promoter (<=1kb)	25432602	25433001	17	25397625	25433278	35654	2	58226	ENSMUST00000159623.1	277	ENSMUSG00000024112	calcium channel, voltage-dependent, T type, alpha 1H subunit
Wnt3a	2.90501	0.817458	0.154908	0.741602	Intron (ENSMUST00000010044.7/22416, intron 2 of 3)	59265153	59265552	11	59248033	59290752	42720	2	22416	ENSMUST00000010044.7	25200	ENSMUSG00000009900	wingless-type MMTV integration site family, member 3A
A4galt	5.73431	-0.305822	0.155143	0.742149	Promoter (<=1kb)	83251081	83251480	15	83228333	83251729	23397	2	239559	ENSMUST00000229687.1	249	ENSMUSG00000047878	alpha 1,4-galactosyltransferase
Slc16a2	1.30115	1.57852	0.155782	0.743548	Intron (ENSMUST00000042664.9/20502, intron 1 of 5)	103757194	103757593	20	103706384	103734189	27806	2	20502	ENSMUST00000148684.2	-23005	ENSMUSG00000033965	solute carrier family 16 (monocarboxylic acid transporters), member 2
Rnf144b	3.55105	-0.61224	0.155974	0.743548	Promoter (<=1kb)	47193875	47194274	13	47193825	47246417	52593	1	218215	ENSMUST00000110111.3	50	ENSMUSG00000038068	ring finger protein 144B
Smad2	1.23436	-1.31476	0.156278	0.743548	Distal Intergenic	76391354	76391753	18	76262492	76302642	40151	1	17126	ENSMUST00000113930.2	128862	ENSMUSG00000024563	SMAD family member 2
Lamc3	1.63979	-1.12335	0.156336	0.743548	Distal Intergenic	31876311	31876710	2	31887291	31945246	57956	1	23928	ENSMUST00000138325.7	-10581	ENSMUSG00000026840	laminin gamma 3
Tcf4	2.79858	0.847902	0.156351	0.743548	Exon (ENSMUST00000237660.1/ENSMUST00000237660.1, exon 1 of 2)	69198196	69198595	18	69343356	69564082	220727	1	21413	ENSMUST00000203002.3	-144761	ENSMUSG00000053477	transcription factor 4
P2rx2	3.45988	-0.627289	0.156386	0.743548	Promoter (<=1kb)	110342740	110343139	5	110339812	110342955	3144	2	231602	ENSMUST00000112478.7	0	ENSMUSG00000029503	purinergic receptor P2X, ligand-gated ion channel, 2
Shisal2a	3.86002	-0.546498	0.156586	0.743548	Promoter (<=1kb)	108383380	108383779	4	108367777	108383349	15573	2	545667	ENSMUST00000053157.6	-31	ENSMUSG00000059816	shisa like 2A
Dnajc6	4.61549	0.426095	0.15663	0.743548	Promoter (<=1kb)	101497109	101497508	4	101496648	101642799	146152	1	72685	ENSMUST00000106930.7	461	ENSMUSG00000028528	DnaJ heat shock protein family (Hsp40) member C6
Samd4b	2.49636	-0.82856	0.15663	0.743548	Promoter (<=1kb)	28436337	28436736	7	28401461	28436227	34767	2	233033	ENSMUST00000207766.1	-110	ENSMUSG00000109336	sterile alpha motif domain containing 4B
Cavin1	7.44075	0.293927	0.156764	0.743548	Promoter (<=1kb)	100970026	100970425	11	100964407	100970551	6145	2	19285	ENSMUST00000132934.1	126	ENSMUSG00000004044	caveolae associated 1
Arid3c	5.7302	0.312377	0.157187	0.743548	Promoter (<=1kb)	41729707	41730106	4	41724139	41730286	6148	2	550619	ENSMUST00000084698.11	180	ENSMUSG00000066224	AT rich interactive domain 3C (BRIGHT-like)
Tnfrsf1a	2.16323	1.07368	0.157205	0.743548	Promoter (<=1kb)	125349664	125350063	6	125349723	125362484	12762	1	21937	ENSMUST00000032491.14	0	ENSMUSG00000030341	tumor necrosis factor receptor superfamily, member 1a
Oard1	2.37628	-0.864716	0.157234	0.743548	Promoter (<=1kb)	48409627	48410026	17	48410014	48417254	7241	1	106821	ENSMUST00000167180.7	0	ENSMUSG00000040771	O-acyl-ADP-ribose deacylase 1
Pantr1	1.55603	-1.16558	0.15726	0.743548	Intron (ENSMUST00000181660.7/66297, intron 1 of 3)	42685722	42686121	1	42648201	42693093	44893	2	66297	ENSMUST00000186656.6	6972	ENSMUSG00000060424	POU domain, class 3, transcription factor 3 adjacent noncoding transcript 1
Dnm3	3.25879	-0.66889	0.15749	0.743548	Promoter (<=1kb)	162477528	162477927	1	162318171	162478012	159842	2	103967	ENSMUST00000161155.7	85	ENSMUSG00000040265	dynamin 3
Sox8	2.90141	0.820975	0.157567	0.743548	Promoter (<=1kb)	25569953	25570352	17	25567988	25570214	2227	2	20681	ENSMUST00000174560.1	0	ENSMUSG00000024176	SRY (sex determining region Y)-box 8
Nkx6-2	7.96092	-0.273891	0.157617	0.743548	Promoter (1-2kb)	139584627	139585026	7	139579376	139582797	3422	2	14912	ENSMUST00000097974.8	-1830	ENSMUSG00000041309	NK6 homeobox 2
Pom121l2	5.27999	0.336901	0.157714	0.743548	Promoter (<=1kb)	21981292	21981691	13	21981520	21984479	2960	1	195236	ENSMUST00000017126.5	0	ENSMUSG00000016982	POM121 membrane glycoprotein-like 2 (rat)
Shox2	3.35875	-0.643743	0.157733	0.743548	Distal Intergenic	66744367	66744766	3	66972780	66978447	5668	2	20429	ENSMUST00000162060.8	233681	ENSMUSG00000027833	short stature homeobox 2
Fam76a	1.21693	-1.3188	0.157978	0.744131	Distal Intergenic	132941173	132941572	4	132899213	132922558	23346	2	230789	ENSMUST00000030696.10	-18615	ENSMUSG00000028878	family with sequence similarity 76, member A
Vipr1	5.58445	0.316805	0.158578	0.745734	Promoter (<=1kb)	121642677	121643076	9	121642716	121672954	30239	1	22354	ENSMUST00000035115.4	0	ENSMUSG00000032528	vasoactive intestinal peptide receptor 1
Oga	3.87441	0.589509	0.158706	0.745734	Promoter (<=1kb)	45783478	45783877	19	45750259	45783551	33293	2	76055	ENSMUST00000026243.4	0	ENSMUSG00000025220	O-GlcNAcase
Arhgap6	3.52169	0.67149	0.158757	0.745734	Promoter (<=1kb)	168796015	168796414	20	168795099	169304435	509337	1	11856	ENSMUST00000033721.12	916	ENSMUSG00000031355	Rho GTPase activating protein 6
Ly6h	3.51325	-0.612749	0.159016	0.745734	Promoter (<=1kb)	75565609	75566008	15	75565213	75566632	1420	2	23934	ENSMUST00000150125.1	624	ENSMUSG00000022577	lymphocyte antigen 6 complex, locus H
Fto	1.3117	1.55345	0.159088	0.745734	Intron (ENSMUST00000069718.14/26383, intron 1 of 8)	91363963	91364362	8	91390555	91409464	18910	1	26383	ENSMUST00000149913.1	-26193	ENSMUSG00000055932	fat mass and obesity associated
Ptk2b	5.80385	-0.30639	0.159312	0.745734	Promoter (<=1kb)	66280226	66280625	14	66153844	66280982	127139	2	19229	ENSMUST00000111121.1	357	ENSMUSG00000059456	PTK2 protein tyrosine kinase 2 beta
4931429L15Rik	1.63968	-1.11043	0.15949	0.745734	Exon (ENSMUST00000213885.1/ENSMUST00000213885.1, exon 4 of 5)	46351836	46352235	9	46303361	46319986	16626	2	74361	ENSMUST00000159565.7	-31850	ENSMUSG00000056617	RIKEN cDNA 4931429L15 gene
Mir9-3hg	3.19972	0.73952	0.159514	0.745734	Exon (ENSMUST00000206829.1/ENSMUST00000206829.1, exon 2 of 2)	79555635	79556034	7	79527850	79532044	4195	1	101694	ENSMUST00000182125.1	27785	ENSMUSG00000097023	Mir9-3 host gene
Fam43a	3.31847	0.714159	0.159654	0.745734	Distal Intergenic	30717767	30718166	16	30599723	30602797	3075	1	224093	ENSMUST00000059078.3	118044	ENSMUSG00000046546	family with sequence similarity 43, member A
Nr4a1	3.02391	0.775066	0.159711	0.745734	Promoter (<=1kb)	101266989	101267388	15	101266846	101274795	7950	1	15370	ENSMUST00000023779.7	143	ENSMUSG00000023034	nuclear receptor subfamily 4, group A, member 1
Spr	1.20205	-1.30983	0.159831	0.745734	Distal Intergenic	85160279	85160678	6	85133678	85137766	4089	2	20751	ENSMUST00000045986.7	-22513	ENSMUSG00000033735	sepiapterin reductase
Ust	3.95508	0.567894	0.159869	0.745734	Promoter (<=1kb)	8517775	8518174	10	8204809	8518825	314017	2	338362	ENSMUST00000061601.8	651	ENSMUSG00000047712	uronyl-2-sulfotransferase
C130021I20Rik	0	-2.26894	0.160044	0.745734	Intron (ENSMUST00000130532.1/ENSMUST00000130532.1, intron 1 of 1)	33717350	33717749	2	33641331	33646354	5024	1	100504399	ENSMUST00000147294.2	76019	NA	Riken cDNA C130021I20 gene
Lhx5	0	-2.26894	0.160044	0.745734	Distal Intergenic	120321011	120321410	5	120431699	120441223	9525	1	16873	ENSMUST00000031591.9	-110289	ENSMUSG00000029595	LIM homeobox protein 5
Map3k9	2.97393	-0.722497	0.160138	0.745734	Promoter (<=1kb)	81780543	81780942	12	81722039	81780874	58836	2	338372	ENSMUST00000222322.1	0	ENSMUSG00000042724	mitogen-activated protein kinase kinase kinase 9
Ebf1	4.95511	-0.347887	0.160531	0.746999	Intron (ENSMUST00000109268.1/13591, intron 6 of 15)	44791374	44791773	11	44912138	44972914	60777	1	13591	ENSMUST00000140822.1	-120365	ENSMUSG00000057098	early B cell factor 1
C77080	0.778835	1.95363	0.16086	0.747541	Promoter (1-2kb)	129225615	129226014	4	129225383	129227480	2098	2	97130	ENSMUST00000146376.1	1466	ENSMUSG00000050390	expressed sequence C77080
Aamp	2.60365	-0.797693	0.160973	0.747541	Promoter (<=1kb)	74284672	74285071	1	74279840	74284738	4899	2	227290	ENSMUST00000006462.13	0	ENSMUSG00000006299	angio-associated migratory protein
Ethe1	3.26747	-0.660127	0.1611	0.747541	Promoter (1-2kb)	24585874	24586273	7	24587543	24608925	21383	1	66071	ENSMUST00000077191.6	-1270	ENSMUSG00000064254	ethylmalonic encephalopathy 1
4933427I22Rik	0.755263	1.95649	0.161134	0.747541	Promoter (<=1kb)	139932138	139932537	4	139926683	139933074	6392	2	71235	ENSMUST00000138672.1	537	ENSMUSG00000085928	RIKEN cDNA 4933427I22 gene
Nkx6-1	2.14499	1.06628	0.161257	0.747548	Distal Intergenic	101322827	101323226	5	101658139	101664996	6858	2	18096	ENSMUST00000044125.10	341770	ENSMUSG00000035187	NK6 homeobox 1
Dok7	2.08345	-0.941228	0.161783	0.748918	Promoter (1-2kb)	35058182	35058581	5	35057077	35087839	30763	1	231134	ENSMUST00000050709.3	1105	ENSMUSG00000044716	docking protein 7
Dlgap2	6.78435	0.307069	0.161833	0.748918	Promoter (<=1kb)	14095867	14096266	8	14095875	14847680	751806	1	244310	ENSMUST00000133298.7	0	ENSMUSG00000047495	DLG associated protein 2
Wwc1	2.00481	-0.970209	0.16205	0.748918	Promoter (<=1kb)	35979358	35979757	11	35838400	35980527	142128	2	211652	ENSMUST00000018993.6	770	ENSMUSG00000018849	WW, C2 and coiled-coil domain containing 1
1700109G15Rik	1.63588	1.31914	0.162127	0.748918	Distal Intergenic	84708086	84708485	11	84716976	84720432	3457	2	78471	ENSMUST00000150735.1	11947	ENSMUSG00000085044	RIKEN cDNA 1700109G15 gene
Mettl1	1.32123	1.53554	0.162162	0.748918	Promoter (<=1kb)	127040586	127040985	10	127041414	127043182	1769	1	17299	ENSMUST00000152960.1	-429	ENSMUSG00000006732	methyltransferase like 1
Gsg1l	1.66055	-1.09922	0.162587	0.749232	Intron (ENSMUST00000073935.6/269994, intron 2 of 6)	126009524	126009923	7	125878420	126082411	203992	2	269994	ENSMUST00000073935.6	72488	ENSMUSG00000046182	GSG1-like
9930012K11Rik	3.6173	0.638901	0.162669	0.749232	Promoter (<=1kb)	70159476	70159875	14	70154405	70159502	5098	2	268759	ENSMUST00000058240.13	0	ENSMUSG00000044551	RIKEN cDNA 9930012K11 gene
Bik	4.59621	0.420077	0.162727	0.749232	Promoter (<=1kb)	83526745	83527144	15	83526862	83544634	17773	1	12124	ENSMUST00000016902.4	0	ENSMUSG00000016758	BCL2-interacting killer
Clic6	5.31532	0.328712	0.162738	0.749232	Promoter (<=1kb)	92498751	92499150	16	92498134	92541243	43110	1	209195	ENSMUST00000023670.3	617	ENSMUSG00000022949	chloride intracellular channel 6
Slc22a3	5.14543	0.341645	0.162918	0.749232	Promoter (<=1kb)	12507107	12507506	17	12418960	12507416	88457	2	20519	ENSMUST00000233535.1	0	ENSMUSG00000023828	solute carrier family 22 (organic cation transporter), member 3
Dmrta2	3.23994	0.719249	0.163338	0.749232	Distal Intergenic	110019842	110020241	4	109978053	109983687	5635	1	242620	ENSMUST00000061187.3	41789	ENSMUSG00000047143	doublesex and mab-3 related transcription factor like family A2
Stx18	4.1306	0.519998	0.163391	0.749232	Distal Intergenic	37967545	37967944	5	38038742	38137765	99024	1	71116	ENSMUST00000114126.8	-70798	ENSMUSG00000029125	syntaxin 18
Prkcd	3.73746	-0.573018	0.163438	0.749232	Promoter (<=1kb)	30625539	30625938	14	30600262	30626172	25911	2	18753	ENSMUST00000130736.7	234	ENSMUSG00000021948	protein kinase C, delta
Tcf7	4.29613	0.48266	0.163447	0.749232	Promoter (<=1kb)	52283933	52284332	11	52253236	52283331	30096	2	21414	ENSMUST00000109071.2	-602	ENSMUSG00000000782	transcription factor 7, T cell specific
Vipr1	2.33266	0.982766	0.163472	0.749232	Promoter (<=1kb)	121669183	121669582	9	121668713	121669509	797	1	22354	ENSMUST00000149959.1	470	ENSMUSG00000032528	vasoactive intestinal peptide receptor 1
Kcp	4.77053	0.38912	0.163571	0.749232	Promoter (<=1kb)	29496517	29496916	6	29482036	29495914	13879	2	333088	ENSMUST00000159479.7	-603	ENSMUSG00000059022	kielin/chordin-like protein
Arid1b	2.40609	-0.8421	0.164002	0.750649	Intron (ENSMUST00000092723.10/239985, intron 4 of 18)	5189823	5190222	17	5040578	5127640	87063	1	239985	ENSMUST00000146703.1	149245	ENSMUSG00000069729	AT rich interactive domain 1B (SWI-like)
Nbl1	5.65245	0.308767	0.164261	0.750895	Promoter (<=1kb)	139093230	139093629	4	139082284	139092993	10710	2	17965	ENSMUST00000042844.6	-237	ENSMUSG00000041120	NBL1, DAN family BMP antagonist
Greb1	2.97485	0.794134	0.164345	0.750895	Promoter (<=1kb)	16800746	16801145	12	16733278	16800886	67609	2	268527	ENSMUST00000161998.2	0	ENSMUSG00000036523	gene regulated by estrogen in breast cancer protein
Nmt2	2.8945	-0.728198	0.164606	0.750895	Promoter (<=1kb)	3283878	3284277	2	3284212	3328877	44666	1	18108	ENSMUST00000081932.12	0	ENSMUSG00000026643	N-myristoyltransferase 2
Kif26b	5.83888	-0.297632	0.164675	0.750895	Promoter (<=1kb)	178529760	178530159	1	178529125	178939200	410076	1	269152	ENSMUST00000161017.7	635	ENSMUSG00000026494	kinesin family member 26B
Vti1a	1.2983	1.53817	0.164676	0.750895	Promoter (2-3kb)	55383753	55384152	19	55381014	55446979	65966	1	53611	ENSMUST00000224396.1	2739	ENSMUSG00000024983	vesicle transport through interaction with t-SNAREs 1A
Ckmt1	3.61077	-0.587362	0.164789	0.750895	Promoter (<=1kb)	121358421	121358820	2	121358610	121363737	5128	1	12716	ENSMUST00000000317.12	0	ENSMUSG00000000308	creatine kinase, mitochondrial 1, ubiquitous
Dpysl4	1.87681	-1.01089	0.165265	0.752508	Promoter (<=1kb)	139085952	139086351	7	139086001	139102704	16704	1	26757	ENSMUST00000026551.14	0	ENSMUSG00000025478	dihydropyrimidinase-like 4
Plekhf2	2.17093	-0.907459	0.165498	0.753009	Promoter (<=1kb)	11007482	11007881	4	10988662	11007676	19015	2	71801	ENSMUST00000054776.3	0	ENSMUSG00000049969	pleckstrin homology domain containing, family F (with FYVE domain) member 2
Cdca3	3.07588	-0.690029	0.166192	0.755609	Promoter (<=1kb)	124829206	124829605	6	124829547	124832664	3118	1	14793	ENSMUST00000150120.7	0	ENSMUSG00000023505	cell division cycle associated 3
Pgm5	0.755688	1.92838	0.166462	0.755637	Intron (ENSMUST00000047666.4/226041, intron 6 of 10)	24781933	24782332	19	24684551	24763078	78528	2	226041	ENSMUST00000133692.1	-18855	ENSMUSG00000041731	phosphoglucomutase 5
Crip1	3.04427	0.761829	0.166559	0.755637	Promoter (<=1kb)	113151686	113152085	12	113152012	113153877	1866	1	12925	ENSMUST00000006523.11	0	ENSMUSG00000006360	cysteine-rich protein 1 (intestinal)
Arhgap20	1.3894	-1.20479	0.166782	0.755637	Promoter (<=1kb)	51765232	51765631	9	51765337	51790249	24913	1	244867	ENSMUST00000124907.1	0	ENSMUSG00000053199	Rho GTPase activating protein 20
Nsg1	1.66051	-1.08645	0.166916	0.755637	Promoter (<=1kb)	38159222	38159621	5	38138543	38159405	20863	2	18196	ENSMUST00000201363.3	0	ENSMUSG00000029126	neuron specific gene family member 1
Pwwp2b	4.32512	-0.439872	0.166976	0.755637	Promoter (<=1kb)	139247423	139247822	7	139248482	139267975	19494	1	101631	ENSMUST00000093993.4	-660	ENSMUSG00000060260	PWWP domain containing 2B
Gsk3b	2.79886	0.836477	0.167115	0.755637	Promoter (<=1kb)	38088946	38089345	16	38089001	38246084	157084	1	56637	ENSMUST00000023507.12	0	ENSMUSG00000022812	glycogen synthase kinase 3 beta
4930405A10Rik	3.53507	-0.596618	0.167149	0.755637	Intron (ENSMUST00000075639.10/76633, intron 2 of 6)	22433798	22434197	14	22507174	22542798	35625	2	74896	ENSMUST00000225327.1	108601	ENSMUSG00000114412	RIKEN cDNA 4930405A10 gene
Gm38426	3.72817	-0.558896	0.16731	0.755637	Promoter (<=1kb)	84912702	84913101	8	84913391	84922915	9525	1	100503676	ENSMUST00000148573.1	-290	ENSMUSG00000003812	predicted gene, 38426
Uts2r	4.58151	-0.392696	0.167371	0.755637	Promoter (3-4kb)	121156508	121156907	11	121160271	121161973	1703	1	217369	ENSMUST00000039044.1	-3364	ENSMUSG00000039321	urotensin 2 receptor
Atcay	1.6625	1.3011	0.167428	0.755637	Promoter (<=1kb)	81230074	81230473	10	81204508	81230785	26278	2	16467	ENSMUST00000146030.7	312	ENSMUSG00000034958	ataxia, cerebellar, Cayman type
Cacna2d4	2.12666	1.05356	0.168141	0.758178	Promoter (<=1kb)	119331368	119331767	6	119330802	119338140	7339	1	319734	ENSMUST00000186203.6	566	ENSMUSG00000041460	calcium channel, voltage-dependent, alpha 2/delta subunit 4
Pou2f3	5.63519	-0.302329	0.168237	0.758178	Promoter (<=1kb)	43205555	43205954	9	43123939	43205755	81817	2	18988	ENSMUST00000176636.4	0	ENSMUSG00000032015	POU domain, class 2, transcription factor 3
Nsf	4.54425	0.427874	0.168363	0.758187	Intron (ENSMUST00000000127.5/22415, intron 2 of 4)	103810240	103810639	11	103822934	103824100	1167	2	18195	ENSMUST00000040443.10	13461	ENSMUSG00000034187	N-ethylmaleimide sensitive fusion protein
C030034L19Rik	1.91023	1.15856	0.168654	0.758944	Distal Intergenic	9346638	9347037	3	9403064	9436317	33254	1	320088	ENSMUST00000180874.7	-56027	ENSMUSG00000097365	RIKEN cDNA C030034L19 gene
Gm10390	0	-2.20599	0.16888	0.759404	Intron (ENSMUST00000031590.11/74111, intron 21 of 23)	120145332	120145731	5	120131485	120139263	7779	2	100503427	ENSMUST00000181905.1	-6069	ENSMUSG00000097368	predicted gene 10390
Metrnl	3.55542	0.640282	0.169767	0.762834	Promoter (<=1kb)	121703282	121703681	11	121702763	121715829	13067	1	210029	ENSMUST00000125580.1	519	ENSMUSG00000039208	meteorin, glial cell differentiation regulator-like
CK137956	3.65873	0.620968	0.169992	0.763286	Promoter (<=1kb)	127971241	127971640	4	127927592	127970951	43360	2	635169	ENSMUST00000030614.2	-290	ENSMUSG00000028813	cDNA sequence CK137956
Gm20757	1.28503	1.51252	0.170267	0.763964	Intron (ENSMUST00000182870.1/627800, intron 2 of 8)	92349219	92349618	10	92171301	92375373	204073	2	627800	ENSMUST00000182870.1	25755	ENSMUSG00000098040	predicted gene, 20757
Kcna5	1.17645	-1.28232	0.170565	0.764432	Distal Intergenic	126434917	126435316	6	126532551	126535412	2862	2	16493	ENSMUST00000060972.4	100096	ENSMUSG00000045534	potassium voltage-gated channel, shaker-related subfamily, member 5
Zfp36l2	4.13987	0.510243	0.17062	0.764432	Promoter (1-2kb)	84186380	84186779	17	84183931	84187947	4017	2	12193	ENSMUST00000060366.6	1168	ENSMUSG00000045817	zinc finger protein 36, C3H type-like 2
Zeb2	2.66727	0.854411	0.170788	0.764627	Promoter (1-2kb)	45108635	45109034	2	45105265	45110076	4812	2	24136	ENSMUST00000201298.1	1042	ENSMUSG00000026872	zinc finger E-box binding homeobox 2
Ptpn18	2.78798	0.814172	0.171084	0.765394	Promoter (<=1kb)	34472437	34472836	1	34472720	34475733	3014	1	19253	ENSMUST00000188972.2	0	ENSMUSG00000026126	protein tyrosine phosphatase, non-receptor type 18
Camk2b	4.53021	-0.410802	0.17127	0.765671	Promoter (<=1kb)	6065465	6065864	11	5969644	6065748	96105	2	12323	ENSMUST00000109813.8	0	ENSMUSG00000057897	calcium/calmodulin-dependent protein kinase II, beta
Nr5a2	6.74788	0.297308	0.171428	0.765757	Promoter (<=1kb)	136948222	136948621	1	136940985	136949173	8189	2	26424	ENSMUST00000195428.1	552	ENSMUSG00000026398	nuclear receptor subfamily 5, group A, member 2
Aopep	2.11504	1.05013	0.171822	0.765757	Promoter (<=1kb)	63272524	63272923	13	63272816	63299668	26853	1	72061	ENSMUST00000223204.1	0	ENSMUSG00000021458	aminopeptidase O
Cntfr	1.89638	1.16095	0.171866	0.765757	Promoter (<=1kb)	41697298	41697697	4	41669674	41697089	27416	2	12804	ENSMUST00000084701.11	-209	ENSMUSG00000028444	ciliary neurotrophic factor receptor
Asb7	2.44863	-0.823027	0.171897	0.765757	Promoter (<=1kb)	66689595	66689994	7	66644565	66689596	45032	2	117589	ENSMUST00000124899.7	0	ENSMUSG00000030509	ankyrin repeat and SOCS box-containing 7
Tecr	0.710586	1.90825	0.171912	0.765757	Intron (ENSMUST00000211972.1/106529, intron 1 of 5)	83601507	83601906	8	83573099	83607971	34873	2	106529	ENSMUST00000211972.1	6065	ENSMUSG00000031708	trans-2,3-enoyl-CoA reductase
Kcnj12	4.72128	0.392155	0.172558	0.768077	Promoter (<=1kb)	61022407	61022806	11	61022564	61071131	48568	1	16515	ENSMUST00000089184.10	0	ENSMUSG00000042529	potassium inwardly-rectifying channel, subfamily J, member 12
Tmem132d	2.32215	0.961185	0.172749	0.768369	Distal Intergenic	128443411	128443810	5	127781630	128433077	651448	2	243274	ENSMUST00000044441.7	-10334	ENSMUSG00000034310	transmembrane protein 132D
Kirrel3	2.33754	0.958002	0.173697	0.771106	Intron (ENSMUST00000115148.8/67703, intron 13 of 16)	35025334	35025733	9	35016452	35030876	14425	1	67703	ENSMUST00000188658.1	8882	ENSMUSG00000032036	kirre like nephrin family adhesion molecule 3
Nrg4	1.27054	1.52856	0.173701	0.771106	Promoter (<=1kb)	55326142	55326541	9	55221301	55326749	105449	2	83961	ENSMUST00000130158.7	208	ENSMUSG00000032311	neuregulin 4
Rassf10	5.73032	0.300383	0.17374	0.771106	Promoter (<=1kb)	112954478	112954877	7	112953962	112957457	3496	1	78748	ENSMUST00000182858.1	516	ENSMUSG00000098132	Ras association (RalGDS/AF-6) domain family (N-terminal) member 10
Ttc7	4.25374	0.484258	0.174128	0.771759	Promoter (<=1kb)	87283899	87284298	17	87282951	87361921	78971	1	225049	ENSMUST00000144204.7	948	ENSMUSG00000036918	tetratricopeptide repeat domain 7
Magee2	0.73661	1.90787	0.174167	0.771759	Distal Intergenic	104955332	104955731	20	104854952	104857267	2316	2	272790	ENSMUST00000033575.6	-98065	ENSMUSG00000031224	MAGE family member E2
Matn4	6.4859	0.293361	0.174264	0.771759	Promoter (<=1kb)	164404498	164404897	2	164389393	164404612	15220	2	17183	ENSMUST00000109358.7	0	ENSMUSG00000016995	matrilin 4
Boc	2.9891	-0.690815	0.17462	0.772319	Distal Intergenic	44564660	44565059	16	44485049	44558897	73849	2	117606	ENSMUST00000114634.2	-5763	ENSMUSG00000022687	biregional cell adhesion molecule-related/down-regulated by oncogenes (Cdon) binding protein
Zdhhc22	4.00301	0.533499	0.174642	0.772319	Promoter (<=1kb)	86989551	86989950	12	86980763	86990430	9668	2	238331	ENSMUST00000222543.1	480	ENSMUSG00000048483	zinc finger, DHHC-type containing 22
Otud7a	6.08384	0.300151	0.174908	0.77294	Promoter (4-5kb)	63758873	63759272	7	63754712	63757925	3214	1	170711	ENSMUST00000177511.1	4161	ENSMUSG00000033510	OTU domain containing 7A
Arhgef4	4.14075	-0.46729	0.17505	0.773013	Promoter (<=1kb)	34751170	34751569	1	34750581	34807144	56564	1	226970	ENSMUST00000159021.8	589	ENSMUSG00000037509	Rho guanine nucleotide exchange factor (GEF) 4
B130024G19Rik	0.724963	1.89512	0.17526	0.773383	Distal Intergenic	70788398	70788797	7	70388305	70388842	538	1	434198	ENSMUST00000080024.5	400093	ENSMUSG00000100005	RIKEN cDNA B130024G19 gene
Arid1b	5.49774	0.308659	0.175479	0.773451	Exon (ENSMUST00000232522.1/ENSMUST00000232522.1, exon 1 of 2)	4946478	4946877	17	4994332	5097733	103402	1	239985	ENSMUST00000124362.1	-47455	ENSMUSG00000069729	AT rich interactive domain 1B (SWI-like)
Glis1	1.25309	1.50539	0.17554	0.773451	Intron (ENSMUST00000046005.8/230587, intron 7 of 10)	107623714	107624113	4	107615000	107632393	17394	1	230587	ENSMUST00000125573.1	8714	ENSMUSG00000034762	GLIS family zinc finger 1
Mir7671	0.434181	-1.66192	0.175956	0.773451	Promoter (1-2kb)	53761875	53762274	11	53763597	53763654	58	2	102465772	ENSMUST00000184599.1	1380	ENSMUSG00000099153	microRNA 7671
Arid1b	0.434181	-1.66192	0.175956	0.773451	Intron (ENSMUST00000124362.1/239985, intron 2 of 2)	5055095	5055494	17	5040578	5127640	87063	1	239985	ENSMUST00000146703.1	14517	ENSMUSG00000069729	AT rich interactive domain 1B (SWI-like)
Tiam2	4.50655	0.426352	0.175989	0.773451	Promoter (<=1kb)	3326855	3327254	17	3326573	3518979	192407	1	24001	ENSMUST00000169838.8	282	ENSMUSG00000023800	T cell lymphoma invasion and metastasis 2
Med13l	3.30285	0.6818	0.17603	0.773451	Distal Intergenic	118436528	118436927	5	118560679	118720114	159436	1	76199	ENSMUST00000201614.1	-123752	ENSMUSG00000018076	mediator complex subunit 13-like
Hoxc8	7.22972	-0.281427	0.176374	0.773553	Promoter (1-2kb)	102991659	102992058	15	102990607	102993821	3215	1	15426	ENSMUST00000001703.7	1052	ENSMUSG00000001657	homeobox C8
Plin1	3.76316	-0.541251	0.17639	0.773553	Promoter (<=1kb)	79722389	79722788	7	79722381	79723288	908	2	103968	ENSMUST00000205553.1	500	ENSMUSG00000030546	perilipin 1
Flnc	6.23882	0.293178	0.176461	0.773553	Promoter (<=1kb)	29434132	29434531	6	29433276	29461883	28608	1	68794	ENSMUST00000101617.8	856	ENSMUSG00000068699	filamin C, gamma
Mir6392	1.66026	1.27671	0.176711	0.773553	Promoter (<=1kb)	84168495	84168894	15	84168270	84168377	108	1	102466642	ENSMUST00000184924.1	225	ENSMUSG00000098882	microRNA 6392
Abcc4	3.19172	0.707985	0.176816	0.773553	Intron (ENSMUST00000036554.13/239273, intron 20 of 30)	118550072	118550471	14	118528823	118534255	5433	2	239273	ENSMUST00000227480.1	-15817	ENSMUSG00000032849	ATP-binding cassette, sub-family C (CFTR/MRP), member 4
Sall4	6.78019	-0.28679	0.176889	0.773553	Promoter (<=1kb)	168765657	168766056	2	168756181	168765246	9066	2	99377	ENSMUST00000137536.1	-411	ENSMUSG00000027547	spalt like transcription factor 4
Gm14812	0.700894	1.89792	0.176994	0.773553	Distal Intergenic	99357249	99357648	20	99405331	99443797	38467	2	100038584	ENSMUST00000156494.1	86149	ENSMUSG00000073051	predicted gene 14812
Insm1	3.83086	0.572161	0.17706	0.773553	Promoter (2-3kb)	146218915	146219314	2	146221921	146225020	3100	1	53626	ENSMUST00000089257.5	-2607	ENSMUSG00000068154	insulinoma-associated 1
Flt1	5.09835	0.333966	0.178031	0.773982	Distal Intergenic	147752694	147753093	5	147561604	147726011	164408	2	14254	ENSMUST00000031653.11	-26683	ENSMUSG00000029648	FMS-like tyrosine kinase 1
Sh3gl2	1.92895	1.13034	0.178081	0.773982	Intron (ENSMUST00000107188.9/20404, intron 1 of 11)	85248742	85249141	4	85205535	85377691	172157	1	20404	ENSMUST00000107184.7	43207	ENSMUSG00000028488	SH3-domain GRB2-like 2
Fat3	1.88991	1.14194	0.178133	0.773982	Promoter (<=1kb)	16501798	16502197	9	15910189	16501285	591097	2	270120	ENSMUST00000217308.2	-513	ENSMUSG00000074505	FAT atypical cadherin 3
Gm12830	6.05644	0.295192	0.178241	0.773982	Intron (ENSMUST00000137570.1/433746, intron 2 of 3)	114843297	114843696	4	114821722	114856166	34445	1	433746	ENSMUST00000137570.1	21575	ENSMUSG00000055198	predicted gene 12830
Cdh22	1.66572	-1.05823	0.178309	0.773982	Promoter (<=1kb)	165181234	165181633	2	165112327	165181459	69133	2	104010	ENSMUST00000138643.1	0	ENSMUSG00000053166	cadherin 22
Gm14812	0.689148	1.88514	0.178324	0.773982	Distal Intergenic	99394738	99395137	20	99405331	99443797	38467	2	100038584	ENSMUST00000156494.1	48660	ENSMUSG00000073051	predicted gene 14812
Itgb4	4.64354	0.399034	0.178519	0.773982	Promoter (<=1kb)	115974963	115975362	11	115974979	116008412	33434	1	192897	ENSMUST00000106460.8	0	ENSMUSG00000020758	integrin beta 4
Med13l	1.88931	-0.981208	0.178558	0.773982	Distal Intergenic	118515013	118515412	5	118560679	118720114	159436	1	76199	ENSMUST00000201614.1	-45267	ENSMUSG00000018076	mediator complex subunit 13-like
4933428G20Rik	6.77757	-0.289353	0.179115	0.773982	Promoter (<=1kb)	97500299	97500698	11	97490783	97500340	9558	2	100141474	ENSMUST00000056955.1	0	ENSMUSG00000047988	RIKEN cDNA 4933428G20 gene
2610028E06Rik	4.28694	-0.434005	0.179138	0.773982	Distal Intergenic	125729339	125729738	4	125887851	125898982	11132	2	72395	ENSMUST00000123368.7	169244	ENSMUSG00000085562	RIKEN cDNA 2610028E06 gene
Megf8	5.58597	0.308067	0.179198	0.773982	Promoter (1-2kb)	25315109	25315508	7	25317164	25365917	48754	1	269878	ENSMUST00000128119.1	-1656	ENSMUSG00000045039	multiple EGF-like-domains 8
Rnf220	5.91221	0.294826	0.179323	0.773982	Promoter (3-4kb)	117303518	117303917	4	117285889	117300028	14140	2	66743	ENSMUST00000150148.1	-3490	ENSMUSG00000028677	ring finger protein 220
Acss2	2.6698	-0.750654	0.179366	0.773982	Promoter (<=1kb)	155517696	155518095	2	155517948	155562746	44799	1	60525	ENSMUST00000029135.14	0	ENSMUSG00000027605	acyl-CoA synthetase short-chain family member 2
Tox2	5.58583	-0.291059	0.179698	0.773982	Exon (ENSMUST00000017961.10/59091, exon 4 of 6)	163339062	163339461	2	163320378	163323102	2725	1	269389	ENSMUST00000148599.1	18684	ENSMUSG00000074607	TOX high mobility group box family member 2
Mir5127	1.17415	-1.26019	0.180072	0.773982	Intron (ENSMUST00000235996.1/ENSMUST00000235996.1, intron 1 of 2)	81647851	81648250	18	81992010	81992080	71	2	100628596	ENSMUST00000175295.1	343830	ENSMUSG00000093036	microRNA 5127
Mcidas	6.94073	0.287023	0.180079	0.773982	Promoter (2-3kb)	112991204	112991603	13	112993845	113000394	6550	1	622408	ENSMUST00000092089.5	-2242	ENSMUSG00000074651	multiciliate differentiation and DNA synthesis associated cell cycle protein
Fgf12	1.75319	-1.03298	0.180336	0.773982	Promoter (<=1kb)	28445512	28445911	16	28396945	28446075	49131	2	14167	ENSMUST00000231717.1	164	ENSMUSG00000022523	fibroblast growth factor 12
Lrrk1	2.87965	0.773777	0.180365	0.773982	Promoter (<=1kb)	66387913	66388312	7	66341670	66388307	46638	2	233328	ENSMUST00000154893.1	0	ENSMUSG00000015133	leucine-rich repeat kinase 1
Trim14	5.7586	0.293778	0.180466	0.773982	Promoter (<=1kb)	46534759	46535158	4	46523576	46534604	11029	2	74735	ENSMUST00000142606.1	-155	ENSMUSG00000039853	tripartite motif-containing 14
Nod1	2.09625	1.03714	0.180564	0.773982	Promoter (<=1kb)	54944304	54944703	6	54928089	54943453	15365	2	107607	ENSMUST00000203076.1	-851	ENSMUSG00000038058	nucleotide-binding oligomerization domain containing 1
Dab2ip	5.39992	0.310881	0.180686	0.773982	Promoter (<=1kb)	35582830	35583229	2	35582840	35730992	148153	1	69601	ENSMUST00000135741.7	0	ENSMUSG00000026883	disabled 2 interacting protein
Cdon	0.402344	-1.64085	0.180725	0.773982	Distal Intergenic	35363366	35363765	9	35421128	35455365	34238	1	57810	ENSMUST00000151682.7	-57363	ENSMUSG00000038119	cell adhesion molecule-related/down-regulated by oncogenes
Dusp26	2.15235	-0.878531	0.180727	0.773982	Promoter (<=1kb)	31089422	31089821	8	31089471	31097047	7577	1	66959	ENSMUST00000036631.13	0	ENSMUSG00000039661	dual specificity phosphatase 26 (putative)
Scube3	1.24625	1.50077	0.180969	0.773982	Promoter (1-2kb)	28161828	28162227	17	28160761	28173027	12267	1	268935	ENSMUST00000148342.7	1067	ENSMUSG00000038677	signal peptide, CUB domain, EGF-like 3
Fndc3c1	1.26392	1.50138	0.181102	0.773982	Promoter (<=1kb)	106484680	106485079	20	106447591	106485022	37432	2	333564	ENSMUST00000149331.1	0	ENSMUSG00000033737	fibronectin type III domain containing 3C1
Thbd	5.7275	0.295526	0.18116	0.773982	Promoter (<=1kb)	148407632	148408031	2	148404466	148408188	3723	2	21824	ENSMUST00000099270.4	157	ENSMUSG00000074743	thrombomodulin
Gpr157	0.701646	1.86955	0.181226	0.773982	Intron (ENSMUST00000094451.3/269604, intron 2 of 3)	150099519	150099918	4	150087365	150105927	18563	1	269604	ENSMUST00000094451.3	12154	ENSMUSG00000047875	G protein-coupled receptor 157
Dus2	0.701646	1.86955	0.181226	0.773982	Promoter (<=1kb)	106047711	106048110	8	106048708	106052199	3492	1	66369	ENSMUST00000144904.1	-598	ENSMUSG00000031901	dihydrouridine synthase 2
Shisa7	2.12035	1.02222	0.181267	0.773982	Promoter (2-3kb)	4841318	4841717	7	4825553	4844696	19144	2	232813	ENSMUST00000066041.11	2979	ENSMUSG00000053550	shisa family member 7
Myo9b	2.58956	-0.767156	0.181337	0.773982	Promoter (<=1kb)	71272319	71272718	8	71272714	71359921	87208	1	17925	ENSMUST00000212935.1	0	ENSMUSG00000004677	myosin IXb
Ankrd63	8.89584	-0.236076	0.181395	0.773982	Promoter (1-2kb)	118702334	118702733	2	118699103	118703963	4861	2	383787	ENSMUST00000104937.1	1230	ENSMUSG00000078137	ankyrin repeat domain 63
BB123696	1.48565	-1.11939	0.18145	0.773982	Promoter (2-3kb)	52754273	52754672	13	52729922	52757205	27284	2	105404	ENSMUST00000223209.1	2533	NA	expressed sequence BB123696
Kcnh1	3.10084	0.720706	0.18151	0.773982	Promoter (<=1kb)	192191254	192191653	1	192190774	192510159	319386	1	16510	ENSMUST00000110844.2	480	ENSMUSG00000058248	potassium voltage-gated channel, subfamily H (eag-related), member 1
Fstl3	1.2983	1.47946	0.181559	0.773982	Promoter (<=1kb)	79779435	79779834	10	79780581	79782607	2027	1	83554	ENSMUST00000168798.1	-747	ENSMUSG00000020325	follistatin-like 3
Sox3	3.56826	-0.573047	0.181565	0.773982	Promoter (2-3kb)	60890782	60891181	20	60891366	60893430	2065	2	20675	ENSMUST00000135107.3	2249	ENSMUSG00000045179	SRY (sex determining region Y)-box 3
Cacng2	3.36288	-0.615291	0.182154	0.775955	Promoter (<=1kb)	78119846	78120245	15	77991748	78120028	128281	2	12300	ENSMUST00000019290.2	0	ENSMUSG00000019146	calcium channel, voltage-dependent, gamma subunit 2
Olfm2	4.31909	-0.42529	0.182296	0.77602	Promoter (<=1kb)	20745000	20745399	9	20667693	20746349	78657	2	244723	ENSMUST00000215999.1	950	ENSMUSG00000032172	olfactomedin 2
Nfatc2	4.26843	0.467774	0.182445	0.776108	Promoter (<=1kb)	168589731	168590130	2	168519098	168590191	71094	2	18019	ENSMUST00000029057.12	61	ENSMUSG00000027544	nuclear factor of activated T cells, cytoplasmic, calcineurin dependent 2
AY702102	1.7489	-1.02466	0.182569	0.776108	Intron (ENSMUST00000123300.2/228911, intron 1 of 1)	170041540	170041939	2	169962015	169963187	1173	2	446211	ENSMUST00000194651.1	-78353	ENSMUSG00000103935	cDNA sequence AY702102
Lrp2	4.16373	0.491825	0.182961	0.777237	Promoter (<=1kb)	69586919	69587318	2	69424340	69586065	161726	2	14725	ENSMUST00000080953.11	-854	ENSMUSG00000027070	low density lipoprotein receptor-related protein 2
Gm13029	4.29126	0.462681	0.183495	0.777885	Intron (ENSMUST00000039331.8/230868, intron 2 of 9)	140109074	140109473	4	140142873	140144633	1761	1	102636673	ENSMUST00000137283.1	-33400	NA	predicted gene 13029
Atxn7l1	0.506623	-1.63192	0.183514	0.777885	Intron (ENSMUST00000146040.8/380753, intron 3 of 12)	33286805	33287204	12	33302515	33368273	65759	1	380753	ENSMUST00000090597.10	-15311	ENSMUSG00000020564	ataxin 7-like 1
Pcdh19	0.97427	-1.34576	0.183696	0.777885	Promoter (<=1kb)	133685424	133685823	20	133582879	133685893	103015	2	279653	ENSMUST00000060309.9	70	ENSMUSG00000051323	protocadherin 19
Mapk8ip1	0.993229	-1.33706	0.183789	0.777885	Promoter (2-3kb)	92390239	92390638	2	92383676	92392731	9056	2	19099	ENSMUST00000111279.8	2093	ENSMUSG00000027223	mitogen-activated protein kinase 8 interacting protein 1
Mir135b	1.22301	1.49427	0.183791	0.777885	Promoter (1-2kb)	132199791	132200190	1	132198088	132198184	97	1	723818	ENSMUST00000083501.1	1703	ENSMUSG00000065435	microRNA 135b
Cox19	0.731647	-1.46748	0.183896	0.777885	Promoter (<=1kb)	139350937	139351336	5	139338221	139351418	13198	2	68033	ENSMUST00000198966.4	82	ENSMUSG00000045438	cytochrome c oxidase assembly protein 19
Drd5	3.90342	0.544701	0.183999	0.777885	Promoter (<=1kb)	38319351	38319750	5	38319367	38322518	3152	1	13492	ENSMUST00000041646.3	0	ENSMUSG00000039358	dopamine receptor D5
Itpr3	6.16397	0.28985	0.184403	0.778969	Promoter (<=1kb)	27057246	27057645	17	27057304	27122223	64920	1	16440	ENSMUST00000049308.8	0	ENSMUSG00000042644	inositol 1,4,5-triphosphate receptor 3
Slit3	5.37287	0.307136	0.184509	0.778969	Promoter (<=1kb)	35121652	35122051	11	35121224	35708507	587284	1	20564	ENSMUST00000069837.3	428	ENSMUSG00000056427	slit guidance ligand 3
4930563F08Rik	1.30359	-1.19525	0.184781	0.779581	Intron (ENSMUST00000161226.8/319974, intron 4 of 18)	131872878	131873277	5	131880269	131883768	3500	1	75369	ENSMUST00000198640.1	-6992	ENSMUSG00000105773	RIKEN cDNA 4930563F08 gene
Bcor	3.46289	0.634019	0.18544	0.781822	Intron (ENSMUST00000043441.12/71458, intron 1 of 13)	12154943	12155342	20	12131493	12160346	28854	2	71458	ENSMUST00000209776.1	5004	ENSMUSG00000040363	BCL6 interacting corepressor
Frmpd4	1.87889	1.12888	0.185574	0.781853	Promoter (<=1kb)	168123090	168123489	20	167473435	168123330	649896	2	333605	ENSMUST00000112149.8	0	ENSMUSG00000049176	FERM and PDZ domain containing 4
Kcnt1	2.62776	0.830052	0.185896	0.782153	Promoter (<=1kb)	25863930	25864329	2	25863968	25916117	52150	1	227632	ENSMUST00000200434.4	0	ENSMUSG00000058740	potassium channel, subfamily T, member 1
Lin28b	3.44961	-0.590382	0.1859	0.782153	Promoter (<=1kb)	45486528	45486927	10	45418363	45486395	68033	2	380669	ENSMUST00000215708.1	-133	ENSMUSG00000063804	lin-28 homolog B (C. elegans)
Rybp	0	-2.11002	0.186255	0.783113	Intron (ENSMUST00000204791.1/ENSMUST00000204791.1, intron 1 of 3)	99983179	99983578	6	100232011	100233131	1121	2	56353	ENSMUST00000203410.1	249553	ENSMUSG00000072872	RING1 and YY1 binding protein
Piezo2	4.93469	0.346346	0.186468	0.783319	Promoter (<=1kb)	63386088	63386487	18	63010848	63386269	375422	2	667742	ENSMUST00000238156.1	0	ENSMUSG00000041482	piezo-type mechanosensitive ion channel component 2
Zfp423	0.692758	1.89579	0.186621	0.783319	Promoter (2-3kb)	87940945	87941344	8	87783316	87944052	160737	2	94187	ENSMUST00000173725.7	2708	ENSMUSG00000045333	zinc finger protein 423
Mpp2	1.49307	-1.10431	0.186687	0.783319	Promoter (<=1kb)	102087661	102088060	11	102080707	102088455	7749	2	50997	ENSMUST00000132687.1	395	ENSMUSG00000017314	membrane protein, palmitoylated 2 (MAGUK p55 subfamily member 2)
Fezf1	1.22543	1.47718	0.187529	0.786316	Intron (ENSMUST00000166458.8/320405, intron 28 of 29)	23271918	23272317	6	23245044	23248362	3319	2	73191	ENSMUST00000031709.6	-23556	ENSMUSG00000029697	Fez family zinc finger 1
Adcy7	2.85947	-0.690843	0.187778	0.786674	Promoter (<=1kb)	88272229	88272628	8	88272403	88329039	56637	1	11513	ENSMUST00000169037.8	0	ENSMUSG00000031659	adenylate cyclase 7
Gm25018	0.986906	-1.32584	0.18787	0.786674	Intron (ENSMUST00000127664.1/108148, intron 1 of 15)	123529522	123529921	8	123538786	123538904	119	2	100861480	ENSMUST00000178106.1	8983	ENSMUSG00000094751	predicted gene, 25018
Six4	5.21885	0.318224	0.188474	0.787627	Promoter (1-2kb)	73111026	73111425	12	73099609	73113425	13817	2	20474	ENSMUST00000043208.7	2000	ENSMUSG00000034460	sine oculis-related homeobox 4
Tcf7l2	1.89129	1.11447	0.188571	0.787627	Intron (ENSMUST00000111662.10/21416, intron 4 of 13)	55880668	55881067	19	55893352	55919618	26267	1	21416	ENSMUST00000145249.7	-12285	ENSMUSG00000024985	transcription factor 7 like 2, T cell specific, HMG box
Bcas3os1	4.02168	0.512006	0.188802	0.787627	Promoter (3-4kb)	85715751	85716150	11	85702200	85719744	17545	2	71489	ENSMUST00000151652.7	3594	ENSMUSG00000086199	breast carcinoma amplified sequence 3, opposite strand 1
4930592C13Rik	0.706734	-1.45045	0.188818	0.787627	Promoter (3-4kb)	157530220	157530619	3	157527515	157534090	6576	2	381498	ENSMUST00000196791.1	3471	ENSMUSG00000105834	RIKEN cDNA 4930592C13 gene
Grasp	3.21732	0.683058	0.188848	0.787627	Promoter (<=1kb)	101224269	101224668	15	101224188	101232756	8569	1	56149	ENSMUST00000000543.5	81	ENSMUSG00000000531	GRP1 (general receptor for phosphoinositides 1)-associated scaffold protein
Dlgap4	4.8351	0.359721	0.188898	0.787627	Promoter (1-2kb)	156614817	156615216	2	156613705	156764363	150659	1	228836	ENSMUST00000169464.8	1112	ENSMUSG00000061689	DLG associated protein 4
Smug1	6.6819	-0.282187	0.189009	0.787627	Promoter (3-4kb)	103170725	103171124	15	103153290	103167092	13803	2	71726	ENSMUST00000229371.1	-3633	ENSMUSG00000036061	single-strand selective monofunctional uracil DNA glycosylase
1700044C05Rik	2.79557	0.788643	0.189295	0.787627	Promoter (4-5kb)	118370172	118370571	14	118365878	118398170	32293	1	73306	ENSMUST00000186060.1	4294	ENSMUSG00000099911	RIKEN cDNA 1700044C05 gene
Slc34a1	0.666812	-1.45841	0.1896	0.787627	Promoter (<=1kb)	55399172	55399571	13	55399693	55414092	14400	1	20505	ENSMUST00000057167.8	-122	ENSMUSG00000021490	solute carrier family 34 (sodium phosphate), member 1
Smarcd3	0	2.91174	0.189817	0.787627	Intron (ENSMUST00000195943.1/66993, intron 2 of 13)	24611316	24611715	5	24592622	24602012	9391	2	66993	ENSMUST00000030791.11	-9304	ENSMUSG00000028949	SWI/SNF related, matrix associated, actin dependent regulator of chromatin, subfamily d, member 3
Lef1	6.41124	-0.279648	0.189825	0.787627	Promoter (<=1kb)	131109122	131109521	3	131110471	131224356	113886	1	16842	ENSMUST00000029611.13	-950	ENSMUSG00000027985	lymphoid enhancer binding factor 1
Tcf7l2	4.47097	0.421267	0.189846	0.787627	Promoter (<=1kb)	55743839	55744238	19	55742845	55910681	167837	1	21416	ENSMUST00000133008.7	994	ENSMUSG00000024985	transcription factor 7 like 2, T cell specific, HMG box
Slc25a28	1.29711	-1.18354	0.189923	0.787627	Distal Intergenic	43653959	43654358	19	43663801	43665974	2174	2	246696	ENSMUST00000236286.1	11616	ENSMUSG00000040414	solute carrier family 25, member 28
Adamts16	3.70722	0.582576	0.189999	0.787627	Promoter (<=1kb)	70841634	70842033	13	70727802	70841811	114010	2	271127	ENSMUST00000080145.12	0	ENSMUSG00000049538	a disintegrin-like and metallopeptidase (reprolysin type) with thrombospondin type 1 motif, 16
Kcnq1	4.71801	0.375055	0.19002	0.787627	Promoter (<=1kb)	143107062	143107461	7	143107254	143427042	319789	1	16535	ENSMUST00000009689.10	0	ENSMUSG00000009545	potassium voltage-gated channel, subfamily Q, member 1
Trim65	1.86483	-0.95399	0.190209	0.787639	Promoter (<=1kb)	116130421	116130820	11	116121846	116131124	9279	2	338364	ENSMUST00000106440.8	304	ENSMUSG00000054517	tripartite motif-containing 65
N4bp3	3.39125	0.643336	0.190279	0.787639	Promoter (<=1kb)	51650563	51650962	11	51643063	51650842	7780	2	212706	ENSMUST00000001080.15	0	ENSMUSG00000001053	NEDD4 binding protein 3
Cbx7	3.06135	-0.650272	0.190449	0.787812	Promoter (<=1kb)	79933278	79933677	15	79930548	79933830	3283	2	52609	ENSMUST00000177061.1	153	ENSMUSG00000053411	chromobox 7
Map3k14	1.89135	-0.952202	0.190909	0.787975	Promoter (<=1kb)	103267482	103267881	11	103264860	103267745	2886	2	53859	ENSMUST00000139621.1	0	ENSMUSG00000020941	mitogen-activated protein kinase kinase kinase 14
Nkd1	1.6063	1.24987	0.190975	0.787975	Distal Intergenic	88495190	88495589	8	88521354	88593618	72265	1	93960	ENSMUST00000034086.12	-25765	ENSMUSG00000031661	naked cuticle 1
Gm11729	3.40981	-0.587435	0.190989	0.787975	Promoter (<=1kb)	117413929	117414328	11	117414389	117415368	980	1	105827746	ENSMUST00000124901.1	-61	ENSMUSG00000086588	predicted gene 11729
Tuba1c	3.36995	0.648854	0.191001	0.787975	Promoter (<=1kb)	99030012	99030411	15	99030321	99034902	4582	1	22146	ENSMUST00000230447.1	0	ENSMUSG00000043091	tubulin, alpha 1C
Rprml	7.01301	0.276863	0.191243	0.787998	Promoter (<=1kb)	103650020	103650419	11	103649570	103650579	1010	1	104582	ENSMUST00000057870.3	450	ENSMUSG00000046215	reprimo-like
Rras	0.0215697	-1.8029	0.191263	0.787998	Promoter (<=1kb)	45019348	45019747	7	45019470	45020405	936	1	20130	ENSMUST00000210895.1	0	ENSMUSG00000038387	related RAS viral (r-ras) oncogene
Mir6391	1.48928	-1.09703	0.191418	0.788108	Intron (ENSMUST00000036554.13/239273, intron 19 of 30)	118565418	118565817	14	118592369	118592472	104	2	102465208	ENSMUST00000184391.1	26655	ENSMUSG00000098433	microRNA 6391
Gadd45g	4.54073	0.401585	0.191946	0.788646	Distal Intergenic	51916825	51917224	13	51846744	51848224	1481	1	23882	ENSMUST00000132480.1	70081	ENSMUSG00000021453	growth arrest and DNA-damage-inducible 45 gamma
Pcsk5	2.63585	0.819306	0.192163	0.788646	Promoter (<=1kb)	17836671	17837070	19	17673452	17837617	164166	2	18552	ENSMUST00000235505.1	547	ENSMUSG00000024713	proprotein convertase subtilisin/kexin type 5
Mmp2	3.81997	-0.510904	0.192232	0.788646	Distal Intergenic	92775476	92775875	8	92827291	92853420	26130	1	17390	ENSMUST00000034187.8	-51416	ENSMUSG00000031740	matrix metallopeptidase 2
Fbp1	2.32971	0.925742	0.19236	0.788646	Promoter (<=1kb)	62887774	62888173	13	62872719	62888127	15409	2	14121	ENSMUST00000134814.1	0	ENSMUSG00000069805	fructose bisphosphatase 1
Gng8	1.86109	1.10748	0.192417	0.788646	Promoter (<=1kb)	16892672	16893071	7	16892321	16895426	3106	1	14709	ENSMUST00000205598.1	351	ENSMUSG00000063594	guanine nucleotide binding protein (G protein), gamma 8
Gchfr	3.2806	-0.609317	0.192536	0.788646	Promoter (<=1kb)	119166870	119167269	2	119167773	119172390	4618	1	320415	ENSMUST00000057454.3	-504	ENSMUSG00000046814	GTP cyclohydrolase I feedback regulator
Cgnl1	4.63306	0.38812	0.192624	0.788646	Promoter (<=1kb)	71771109	71771508	9	71629211	71771560	142350	2	68178	ENSMUST00000122065.1	52	ENSMUSG00000032232	cingulin-like 1
Fam169a	2.27887	0.930096	0.192672	0.788646	Promoter (<=1kb)	97068143	97068542	13	97067286	97131013	63728	1	320557	ENSMUST00000169863.8	857	ENSMUSG00000041817	family with sequence similarity 169, member A
Slco3a1	1.6049	1.2481	0.192703	0.788646	Promoter (<=1kb)	74552676	74553075	7	74504239	74552594	48356	2	108116	ENSMUST00000138099.1	-82	ENSMUSG00000025790	solute carrier organic anion transporter family, member 3a1
Slc16a8	5.17137	-0.303863	0.193019	0.789253	Promoter (2-3kb)	79252329	79252728	15	79251014	79254761	3748	2	57274	ENSMUST00000039752.3	2033	ENSMUSG00000032988	solute carrier family 16 (monocarboxylic acid transporters), member 8
Zc3hav1	7.32132	0.271745	0.193144	0.789253	Promoter (<=1kb)	38353821	38354220	6	38305286	38354273	48988	2	78781	ENSMUST00000114900.7	53	ENSMUSG00000029826	zinc finger CCCH type, antiviral 1
3300002P13Rik	2.47698	0.867797	0.193296	0.789253	Promoter (<=1kb)	3422477	3422876	7	3421665	3423445	1781	2	70230	ENSMUST00000204020.1	569	ENSMUSG00000107585	RIKEN cDNA 3300002P13 gene
Wt1	8.92265	-0.228745	0.193365	0.789253	Promoter (<=1kb)	105130417	105130816	2	105130800	105133950	3151	1	22431	ENSMUST00000145107.1	0	ENSMUSG00000016458	Wilms tumor 1 homolog
Cbx4	7.39532	-0.266449	0.193788	0.78976	Promoter (3-4kb)	119089845	119090244	11	119081373	119086221	4849	2	12418	ENSMUST00000145058.1	-3624	ENSMUSG00000039989	chromobox 4
Dysf	0	-2.07604	0.19394	0.78976	Promoter (4-5kb)	84100394	84100793	6	84105373	84112199	6827	1	26903	ENSMUST00000127459.7	-4580	ENSMUSG00000033788	dysferlin
Itpripl2	6.31202	-0.278415	0.194271	0.78976	Promoter (<=1kb)	118490693	118491092	7	118485111	118491975	6865	2	319622	ENSMUST00000178344.2	883	ENSMUSG00000095115	inositol 1,4,5-triphosphate receptor interacting protein-like 2
Celrr	2.45714	0.863383	0.194443	0.78976	Intron (ENSMUST00000181433.7/98452, intron 1 of 4)	121098315	121098714	1	121087529	121088932	1404	1	98452	ENSMUST00000181183.2	10786	ENSMUSG00000097881	cerebellum expressed regulatory RNA
Atg4d	3.65747	-0.541496	0.194449	0.78976	Promoter (<=1kb)	21265045	21265444	9	21265293	21277772	12480	1	235040	ENSMUST00000065005.4	0	ENSMUSG00000002820	autophagy related 4D, cysteine peptidase
Cep85	2.86559	-0.68831	0.194453	0.78976	Promoter (<=1kb)	134187007	134187406	4	134129858	134187112	57255	2	70012	ENSMUST00000040271.11	0	ENSMUSG00000037443	centrosomal protein 85
Abcb9	1.85163	-0.949861	0.194816	0.78976	Promoter (<=1kb)	124095296	124095695	5	124087935	124095786	7852	2	56325	ENSMUST00000126970.2	91	ENSMUSG00000029408	ATP-binding cassette, sub-family B (MDR/TAP), member 9
Rasl11b	2.08173	-0.881106	0.19487	0.78976	Distal Intergenic	74163640	74164039	5	74195286	74199481	4196	1	68939	ENSMUST00000051937.8	-31247	ENSMUSG00000049907	RAS-like, family 11, member B
A530065N20Rik	0.990198	-1.31068	0.194942	0.78976	Distal Intergenic	59927142	59927541	13	60029711	60116669	86959	1	328263	ENSMUST00000225266.1	-102170	ENSMUSG00000114531	RIKEN cDNA A530046M15 gene
Trabd2b	4.1843	0.470172	0.194981	0.78976	Promoter (<=1kb)	114406816	114407215	4	114406724	114615098	208375	1	666048	ENSMUST00000094894.3	92	ENSMUSG00000070867	TraB domain containing 2B
T2	3.11175	0.695612	0.195058	0.78976	Exon (ENSMUST00000140890.2/21331, exon 3 of 6)	8389271	8389670	17	8396629	8422728	26100	1	21331	ENSMUST00000169635.2	-6959	ENSMUSG00000058159	brachyury 2
Grm7	2.75251	0.777082	0.19512	0.78976	Promoter (1-2kb)	110646791	110647190	6	110645582	111567230	921649	1	108073	ENSMUST00000172951.1	1209	ENSMUSG00000056755	glutamate receptor, metabotropic 7
Mctp1	1.19404	1.46159	0.19516	0.78976	Intron (ENSMUST00000125209.7/78771, intron 10 of 20)	76807900	76808299	13	76825207	76828076	2870	1	78771	ENSMUST00000155275.1	-16908	ENSMUSG00000021596	multiple C2 domains, transmembrane 1
Adcy8	5.49146	-0.284906	0.195497	0.78981	Promoter (<=1kb)	64920972	64921371	15	64782562	64922271	139710	2	11514	ENSMUST00000228109.1	900	ENSMUSG00000022376	adenylate cyclase 8
9030404E10Rik	1.87422	1.09362	0.195531	0.78981	Promoter (<=1kb)	30038510	30038909	16	30021842	30039479	17638	2	71528	ENSMUST00000232465.1	570	ENSMUSG00000116660	RIKEN cDNA 9030404E10 gene
Dach1	2.12612	0.994692	0.195647	0.78981	Intron (ENSMUST00000069334.7/13134, intron 1 of 10)	98085790	98086189	14	97786853	98169543	382691	2	13134	ENSMUST00000069334.7	83354	ENSMUSG00000055639	dachshund family transcription factor 1
Htr2a	1.87938	1.11297	0.195686	0.78981	Promoter (<=1kb)	74640753	74641152	14	74640840	74709494	68655	1	15558	ENSMUST00000036653.4	0	ENSMUSG00000034997	5-hydroxytryptamine (serotonin) receptor 2A
Vgll4	5.04474	-0.312607	0.196673	0.790491	Promoter (<=1kb)	114968238	114968637	6	114862321	114969180	106860	2	232334	ENSMUST00000147639.7	543	ENSMUSG00000030315	vestigial like family member 4
Dcbld2	0	2.85727	0.196726	0.790491	Distal Intergenic	58180812	58181211	16	58408443	58469727	61285	1	73379	ENSMUST00000046663.7	-227232	ENSMUSG00000035107	discoidin, CUB and LCCL domain containing 2
Tle7	0	2.85727	0.196726	0.790491	Downstream (<1kb)	110136221	110136620	8	110109772	110111762	1991	1	102638837	ENSMUST00000178785.1	26449	ENSMUSG00000095941	TLE family member 7
Ddx3x	0	2.85727	0.196726	0.790491	Distal Intergenic	13356230	13356629	20	13287785	13289915	2131	1	13205	ENSMUST00000149639.1	68445	ENSMUSG00000000787	DEAD box helicase 3, X-linked
Igfbp6	4.17763	0.469956	0.197112	0.790491	Promoter (<=1kb)	102144534	102144933	15	102144362	102149511	5150	1	16012	ENSMUST00000023807.6	172	ENSMUSG00000023046	insulin-like growth factor binding protein 6
Eno2	2.09328	0.988915	0.197284	0.790491	Promoter (<=1kb)	124769265	124769664	6	124760055	124769621	9567	2	13807	ENSMUST00000112476.7	0	ENSMUSG00000004267	enolase 2, gamma neuronal
Tle3	1.58281	1.2366	0.197371	0.790491	Distal Intergenic	61363587	61363986	9	61372366	61418497	46132	1	21887	ENSMUST00000178113.7	-8380	ENSMUSG00000032280	transducin-like enhancer of split 3
Atf2	3.37656	0.643735	0.197426	0.790491	Promoter (<=1kb)	73892703	73893102	2	73816509	73892639	76131	2	11909	ENSMUST00000112016.8	-64	ENSMUSG00000027104	activating transcription factor 2
1700112H15Rik	0.0299037	-1.77925	0.197639	0.790491	Distal Intergenic	184452262	184452661	1	184527841	184557691	29851	2	73590	ENSMUST00000188766.1	105030	ENSMUSG00000101574	RIKEN cDNA 1700112H15 gene
Cldn5	6.29937	0.280056	0.197693	0.790491	Promoter (<=1kb)	18776956	18777355	16	18776847	18778262	1416	1	12741	ENSMUST00000043577.2	109	ENSMUSG00000041378	claudin 5
Ndrg4	3.88845	-0.495081	0.197785	0.790491	Promoter (<=1kb)	95678576	95678975	8	95678245	95714952	36708	1	234593	ENSMUST00000166358.7	331	ENSMUSG00000036564	N-myc downstream regulated gene 4
Prdm16	1.33499	-1.15354	0.197937	0.790491	Intron (ENSMUST00000030902.12/70673, intron 1 of 16)	154613799	154614198	4	154476500	154636797	160298	2	70673	ENSMUST00000149605.1	22599	ENSMUSG00000039410	PR domain containing 16
Ltb4r1	1.69824	-0.999627	0.198022	0.790491	Promoter (1-2kb)	55763630	55764029	14	55765962	55768494	2533	1	16995	ENSMUST00000057569.3	-1933	ENSMUSG00000046908	leukotriene B4 receptor 1
Mapk7	2.54234	-0.760384	0.198168	0.790491	Promoter (<=1kb)	61494262	61494661	11	61488812	61494266	5455	2	23939	ENSMUST00000101085.8	0	ENSMUSG00000001034	mitogen-activated protein kinase 7
4933425B07Rik	3.31077	0.650912	0.198236	0.790491	Promoter (<=1kb)	46637917	46638316	14	46602806	46637423	34618	2	74458	ENSMUST00000226569.1	-494	ENSMUSG00000115665	RIKEN cDNA 4933425B07 gene
Adra2b	6.39377	0.278818	0.198237	0.790491	Promoter (<=1kb)	127363952	127364351	2	127363286	127367221	3936	1	11552	ENSMUST00000071902.4	666	ENSMUSG00000058620	adrenergic receptor, alpha 2b
B230112J18Rik	3.84477	0.536513	0.198415	0.790491	Promoter (2-3kb)	116314575	116314974	5	116312360	116318281	5922	1	77846	ENSMUST00000128473.1	2215	ENSMUSG00000086715	RIKEN cDNA B230112J18 gene
Phactr2	4.04939	0.498511	0.198829	0.790491	Promoter (<=1kb)	13473732	13474131	10	13207717	13474412	266696	2	215789	ENSMUST00000105545.11	281	ENSMUSG00000062866	phosphatase and actin regulator 2
Schip1	1.86513	1.10743	0.19894	0.790491	Promoter (4-5kb)	68069599	68069998	3	68064802	68626464	561663	1	30953	ENSMUST00000169909.9	4797	ENSMUSG00000027777	schwannomin interacting protein 1
Tbx5	1.88793	-0.934173	0.199005	0.790491	Intron (ENSMUST00000018407.9/21388, intron 7 of 8)	119866834	119867233	5	119836155	119845110	8956	1	21388	ENSMUST00000202504.2	30679	ENSMUSG00000018263	T-box 5
Sstr1	5.49645	-0.283693	0.199033	0.790491	Promoter (<=1kb)	58212501	58212900	12	58211804	58214444	2641	1	20605	ENSMUST00000044299.2	697	ENSMUSG00000035431	somatostatin receptor 1
Slc45a1	0	2.82804	0.19916	0.790491	Promoter (1-2kb)	150645171	150645570	4	150643289	150644089	801	2	242773	ENSMUST00000147706.1	-1082	ENSMUSG00000039838	solute carrier family 45, member 1
Tafa4	0	2.82804	0.19916	0.790491	Intron (ENSMUST00000089295.5/320701, intron 3 of 5)	97009261	97009660	6	96831203	97060413	229211	2	320701	ENSMUST00000089295.5	50753	ENSMUSG00000046500	TAFA chemokine like family member 4
Col15a1	5.42777	-0.284583	0.199181	0.790491	Promoter (<=1kb)	47208358	47208757	4	47208161	47313167	105007	1	12819	ENSMUST00000102917.10	197	ENSMUSG00000028339	collagen, type XV, alpha 1
4933427I22Rik	1.22154	1.44146	0.199319	0.790491	Exon (ENSMUST00000153921.1/71235, exon 3 of 3)	139926095	139926494	4	139926683	139933074	6392	2	71235	ENSMUST00000138672.1	6580	ENSMUSG00000085928	RIKEN cDNA 4933427I22 gene
Unc5b	1.4863	-1.07667	0.199451	0.790491	Exon (ENSMUST00000218180.1/ENSMUST00000218180.1, exon 1 of 1)	60811401	60811800	10	60762610	60820641	58032	2	107449	ENSMUST00000218316.1	8841	ENSMUSG00000020099	unc-5 netrin receptor B
Cys1	3.9953	0.503088	0.199525	0.790491	Promoter (<=1kb)	24681477	24681876	12	24665838	24681813	15976	2	12879	ENSMUST00000074163.12	0	ENSMUSG00000062563	cystin 1
Gm4349	1.83882	1.09255	0.199654	0.790491	Promoter (<=1kb)	95427390	95427789	3	95427671	95431087	3417	1	100043305	ENSMUST00000181809.1	0	NA	SET domain, bifurcated 1 pseudogene
Tiam1	1.50563	-1.08459	0.199756	0.790491	Promoter (<=1kb)	90143715	90144114	16	89787111	90143769	356659	2	21844	ENSMUST00000114124.8	0	ENSMUSG00000002489	T cell lymphoma invasion and metastasis 1
Crtc1	1.19542	1.44289	0.199867	0.790491	Promoter (4-5kb)	70444318	70444717	8	70382355	70439579	57225	2	382056	ENSMUST00000142769.7	-4739	ENSMUSG00000003575	CREB regulated transcription coactivator 1
Zbtb7c	4.87791	0.344394	0.199924	0.790491	Promoter (<=1kb)	76060229	76060628	18	76059458	76146443	86986	1	207259	ENSMUST00000167921.1	771	ENSMUSG00000044646	zinc finger and BTB domain containing 7C
Nbeal2	2.72318	-0.699109	0.19997	0.790491	Promoter (<=1kb)	110653002	110653401	9	110624872	110654142	29271	2	235627	ENSMUST00000196488.4	741	ENSMUSG00000056724	neurobeachin-like 2
Rab3a	3.2632	-0.600299	0.200237	0.791041	Promoter (<=1kb)	70754428	70754827	8	70754679	70758677	3999	1	19339	ENSMUST00000110093.8	0	ENSMUSG00000031840	RAB3A, member RAS oncogene family
Gm12830	4.74426	0.362308	0.200574	0.791764	Distal Intergenic	114729626	114730025	4	114821722	114856166	34445	1	433746	ENSMUST00000137570.1	-91697	ENSMUSG00000055198	predicted gene 12830
Cpxm1	5.23177	0.305854	0.200718	0.791764	Exon (ENSMUST00000110288.8/228598, exon 14 of 18)	130361991	130362390	2	130390776	130393276	2501	2	56264	ENSMUST00000130533.1	30886	ENSMUSG00000027408	carboxypeptidase X 1 (M14 family)
Tet1	3.58375	0.586794	0.200807	0.791764	Promoter (<=1kb)	62886638	62887037	10	62879873	62887324	7452	2	52463	ENSMUST00000218438.1	287	ENSMUSG00000047146	tet methylcytosine dioxygenase 1
Dmrta2	6.59236	0.275848	0.201465	0.793493	Promoter (1-2kb)	109979110	109979509	4	109978053	109983687	5635	1	242620	ENSMUST00000061187.3	1057	ENSMUSG00000047143	doublesex and mab-3 related transcription factor like family A2
Nav2	2.28055	0.910381	0.201503	0.793493	Intron (ENSMUST00000210463.1/ENSMUST00000210463.1, intron 1 of 8)	48896081	48896480	7	48908716	48963824	55109	1	78286	ENSMUST00000184336.1	-12236	ENSMUSG00000052512	neuron navigator 2
Wscd2	2.71887	-0.697688	0.201679	0.793676	Promoter (<=1kb)	113490594	113490993	5	113490447	113589725	99279	1	320916	ENSMUST00000094452.3	147	ENSMUSG00000063430	WSC domain containing 2
Eno4	2.9817	0.709214	0.202162	0.795066	Exon (ENSMUST00000237297.1/73442, exon 2 of 7)	58931751	58932150	19	58943425	58971419	27995	1	226265	ENSMUST00000054280.9	-11275	ENSMUSG00000048029	enolase 4
Sox7	7.5074	0.26107	0.203522	0.798321	Promoter (<=1kb)	63943861	63944260	14	63943673	63950732	7060	1	20680	ENSMUST00000079652.6	188	ENSMUSG00000063060	SRY (sex determining region Y)-box 7
Psd3	1.87592	1.07633	0.203571	0.798321	Promoter (2-3kb)	67948489	67948888	8	67903648	67951879	48232	2	234353	ENSMUST00000145595.1	2991	ENSMUSG00000030465	pleckstrin and Sec7 domain containing 3
M5C1000I18Rik	3.63932	-0.532559	0.203673	0.798321	Promoter (<=1kb)	67759662	67760061	9	67758713	67760230	1518	2	102633151	ENSMUST00000186205.1	169	ENSMUSG00000055125	RIKEN cDNA M5C1000I18 gene
Comp	0	2.79895	0.203777	0.798321	Distal Intergenic	70364608	70365007	8	70373558	70382066	8509	1	12845	ENSMUST00000003659.8	-8551	ENSMUSG00000031849	cartilage oligomeric matrix protein
Mdk	5.42088	0.293339	0.203794	0.798321	Distal Intergenic	91922961	91923360	2	91929805	91931688	1884	2	17242	ENSMUST00000111309.7	8328	ENSMUSG00000027239	midkine
Skap1	2.26441	-0.828846	0.203947	0.798321	Intron (ENSMUST00000103154.10/78473, intron 4 of 12)	96673735	96674134	11	96708235	96713202	4968	1	78473	ENSMUST00000123814.1	-34101	ENSMUSG00000057058	src family associated phosphoprotein 1
Adra2c	2.21767	-0.820858	0.204006	0.798321	Distal Intergenic	35313997	35314396	5	35278319	35281763	3445	1	11553	ENSMUST00000049545.6	35678	ENSMUSG00000045318	adrenergic receptor, alpha 2c
Olfr1505	3.29705	-0.588583	0.204486	0.798321	Distal Intergenic	14242892	14243291	19	13918942	13920044	1103	1	258151	ENSMUST00000081520.2	323950	ENSMUSG00000062314	olfactory receptor 1505
Ncf1	2.07684	0.985339	0.204647	0.798321	Promoter (<=1kb)	134222102	134222501	5	134221372	134222222	851	2	17969	ENSMUST00000182626.1	0	ENSMUSG00000015950	neutrophil cytosolic factor 1
Sidt1	3.69255	-0.520331	0.204667	0.798321	Promoter (<=1kb)	44332185	44332584	16	44284250	44332541	48292	2	320007	ENSMUST00000124651.1	0	ENSMUSG00000022696	SID1 transmembrane family, member 1
2410017I17Rik	0.399059	-1.54795	0.204716	0.798321	Exon (ENSMUST00000173127.2/ENSMUST00000173127.2, exon 3 of 4)	36138001	36138400	17	36145018	36162374	17357	1	675325	ENSMUST00000056774.15	-6618	ENSMUSG00000038311	RIKEN cDNA 2410017I17 gene
Acot7	2.30702	-0.788756	0.204794	0.798321	Intron (ENSMUST00000075363.9/70025, intron 2 of 8)	152213802	152214201	4	152199868	152217876	18009	1	70025	ENSMUST00000144733.1	13934	ENSMUSG00000028937	acyl-CoA thioesterase 7
Ptf1a	8.2747	0.240856	0.204951	0.798321	Promoter (<=1kb)	19445152	19445551	2	19445663	19447501	1839	1	19213	ENSMUST00000028068.2	-112	ENSMUSG00000026735	pancreas specific transcription factor, 1a
Insig1	3.73263	-0.514198	0.205156	0.798321	Promoter (<=1kb)	28071144	28071543	5	28071363	28078662	7300	1	231070	ENSMUST00000059155.10	0	ENSMUSG00000045294	insulin induced gene 1
Gnas	2.94915	-0.654429	0.205425	0.798321	Promoter (<=1kb)	174327614	174328013	2	174327699	174346502	18804	1	14683	ENSMUST00000156623.7	0	ENSMUSG00000027523	GNAS (guanine nucleotide binding protein, alpha stimulating) complex locus
Hibadh	3.65769	-0.527604	0.205701	0.798321	Promoter (<=1kb)	52640206	52640605	6	52546228	52640389	94162	2	58875	ENSMUST00000031788.8	0	ENSMUSG00000029776	3-hydroxyisobutyrate dehydrogenase
Tgfbr3	4.80876	-0.334153	0.205788	0.798321	Intron (ENSMUST00000031224.14/21814, intron 2 of 16)	107244913	107245312	5	107147980	107289595	141616	2	21814	ENSMUST00000146591.1	44283	ENSMUSG00000029287	transforming growth factor, beta receptor III
B3gnt8	1.75146	-0.968965	0.20583	0.798321	Promoter (<=1kb)	25627976	25628375	7	25627642	25629485	1844	1	232984	ENSMUST00000206824.1	334	ENSMUSG00000059479	UDP-GlcNAc:betaGal beta-1,3-N-acetylglucosaminyltransferase 8
Rab1a	3.00551	-0.648088	0.206029	0.798321	Promoter (<=1kb)	20201004	20201403	11	20201432	20226856	25425	1	19324	ENSMUST00000020358.11	-29	ENSMUSG00000020149	RAB1A, member RAS oncogene family
Unc45b	6.19733	0.282607	0.206032	0.798321	Promoter (1-2kb)	82930530	82930929	11	82928959	82929745	787	1	217012	ENSMUST00000125499.1	1571	ENSMUSG00000018845	unc-45 myosin chaperone B
Ano1	1.72774	-0.970768	0.206232	0.798321	Promoter (<=1kb)	144738026	144738425	7	144588549	144738543	149995	2	101772	ENSMUST00000121758.7	118	ENSMUSG00000031075	anoctamin 1, calcium activated chloride channel
Htatip2	1.57327	1.21878	0.206417	0.798321	Promoter (2-3kb)	49756317	49756716	7	49759115	49762759	3645	1	53415	ENSMUST00000208048.1	-2399	ENSMUSG00000039745	HIV-1 Tat interactive protein 2
St8sia3	3.19088	0.665594	0.206433	0.798321	Promoter (<=1kb)	64266041	64266440	18	64266177	64269836	3660	1	20451	ENSMUST00000134064.1	0	ENSMUSG00000056812	ST8 alpha-N-acetyl-neuraminide alpha-2,8-sialyltransferase 3
Adamts12	2.25823	0.905498	0.206469	0.798321	Promoter (<=1kb)	11063575	11063974	15	11064790	11153010	88221	1	239337	ENSMUST00000227189.1	-816	ENSMUSG00000047497	a disintegrin-like and metallopeptidase (reprolysin type) with thrombospondin type 1 motif, 12
Enpp7	1.54596	-1.04515	0.206594	0.798321	Distal Intergenic	118999593	118999992	11	118988216	118993221	5006	1	238011	ENSMUST00000106273.2	11377	ENSMUSG00000046697	ectonucleotide pyrophosphatase/phosphodiesterase 7
Gjb1	4.65097	-0.349064	0.206642	0.798321	Promoter (<=1kb)	101384218	101384617	20	101383736	101385629	1894	1	14618	ENSMUST00000119190.1	482	ENSMUSG00000047797	gap junction protein, beta 1
Runx1	5.67954	-0.276353	0.206663	0.798321	Promoter (<=1kb)	92696450	92696849	16	92605398	92696125	90728	2	12394	ENSMUST00000168195.7	-325	ENSMUSG00000022952	runt related transcription factor 1
Cdk3	4.94523	0.329209	0.206761	0.798321	Exon (ENSMUST00000037007.3/14027, exon 22 of 22)	116222237	116222636	11	116216540	116220287	3748	1	69681	ENSMUST00000173567.1	5697	ENSMUSG00000092300	cyclin-dependent kinase 3
9130015G15Rik	3.12753	0.675634	0.206984	0.798321	Intron (ENSMUST00000183659.7/78286, intron 2 of 39)	49068421	49068820	7	49122334	49134276	11943	2	108167511	ENSMUST00000208636.1	65456	NA	RIKEN cDNA 9130015G15 gene
Gal	3.15986	0.662033	0.207012	0.798321	Promoter (<=1kb)	3414066	3414465	19	3409932	3414447	4516	2	14419	ENSMUST00000025842.7	0	ENSMUSG00000024907	galanin and GMAP prepropeptide
Cfap65	0	2.77367	0.207237	0.798321	Promoter (3-4kb)	74938842	74939241	1	74902071	74935599	33529	2	241116	ENSMUST00000094844.3	-3243	ENSMUSG00000047021	cilia and flagella associated protein 65
Rtn1	0	2.77367	0.207237	0.798321	Promoter (4-5kb)	72230760	72231159	12	72211752	72235739	23988	2	104001	ENSMUST00000150156.1	4580	ENSMUSG00000021087	reticulon 1
Kit	2.4787	0.840261	0.207275	0.798321	Intron (ENSMUST00000144270.7/16590, intron 1 of 20)	75592454	75592853	5	75574955	75656722	81768	1	16590	ENSMUST00000005815.6	17499	ENSMUSG00000005672	KIT proto-oncogene receptor tyrosine kinase
Irf2bp2	1.16361	1.42701	0.207532	0.798321	Distal Intergenic	126699644	126700043	8	126588296	126593986	5691	2	270110	ENSMUST00000054960.7	-105658	ENSMUSG00000051495	interferon regulatory factor 2 binding protein 2
8430437L04Rik	2.61735	-0.712542	0.207575	0.798321	Distal Intergenic	72619182	72619581	2	72703510	72729468	25959	1	74541	ENSMUST00000124829.1	-83929	ENSMUSG00000085252	RIKEN cDNA 8430437L04 gene
Zic2	7.92503	-0.245388	0.207665	0.798321	Distal Intergenic	122483787	122484186	14	122478100	122479050	951	1	22772	ENSMUST00000137059.1	5687	ENSMUSG00000061524	zinc finger protein of the cerebellum 2
Grm4	0.60814	1.80421	0.207823	0.79843	Promoter (<=1kb)	27513024	27513423	17	27425899	27513406	87508	2	268934	ENSMUST00000118161.2	0	ENSMUSG00000063239	glutamate receptor, metabotropic 4
4930459C07Rik	0.634357	1.80149	0.208139	0.799145	Distal Intergenic	96098113	96098512	10	96226020	96248866	22847	1	74881	ENSMUST00000219638.1	-127508	ENSMUSG00000112762	RIKEN cDNA 4930459C07 gene
Slco2a1	4.13004	0.468902	0.208471	0.799919	Promoter (<=1kb)	103008334	103008733	9	103008499	103096002	87504	1	24059	ENSMUST00000188664.1	0	ENSMUSG00000032548	solute carrier organic anion transporter family, member 2a1
Nt5dc3	2.75586	-0.683991	0.208607	0.799942	Promoter (<=1kb)	86779158	86779557	10	86779005	86838389	59385	1	103466	ENSMUST00000099396.2	153	ENSMUSG00000054027	5'-nucleotidase domain containing 3
Foxs1	0.357427	-1.54107	0.208821	0.800176	Promoter (1-2kb)	152931449	152931848	2	152931898	152933208	1311	2	14239	ENSMUST00000099200.2	1360	ENSMUSG00000074676	forkhead box S1
Kctd1	6.30386	0.272494	0.20895	0.800176	Promoter (1-2kb)	15065837	15066236	18	14974055	15064098	90044	2	106931	ENSMUST00000234864.1	-1739	ENSMUSG00000036225	potassium channel tetramerisation domain containing 1
9630013K17Rik	0.605873	1.8015	0.209193	0.800176	Promoter (2-3kb)	63966850	63967249	11	63964226	63968040	3815	1	78883	ENSMUST00000146915.1	2624	ENSMUSG00000086359	RIKEN cDNA 9630013K17 gene
Ccdc166	2.73734	-0.682911	0.209239	0.800176	Promoter (<=1kb)	75981616	75982015	15	75979872	75982442	2571	2	223648	ENSMUST00000183130.2	427	ENSMUSG00000098176	coiled-coil domain containing 166
Arhgef17	2.88117	0.725591	0.209319	0.800176	Promoter (<=1kb)	100930839	100931238	7	100869752	100932107	62356	2	207212	ENSMUST00000107032.2	869	ENSMUSG00000032875	Rho guanine nucleotide exchange factor (GEF) 17
Mir124-2hg	2.52153	-0.727425	0.20956	0.800601	Distal Intergenic	17623844	17624243	3	17789921	17800073	10153	1	70441	ENSMUST00000188983.6	-165678	ENSMUSG00000100252	Mir124-2 host gene (non-protein coding)
Wapl	4.16527	-0.432579	0.210187	0.801257	Distal Intergenic	34660785	34661184	14	34673928	34747983	74056	1	218914	ENSMUST00000048263.13	-12744	ENSMUSG00000041408	WAPL cohesin release factor
Trim25	2.65644	-0.69705	0.210478	0.801257	Promoter (<=1kb)	88999524	88999923	11	88999376	89020293	20918	1	217069	ENSMUST00000107896.9	148	ENSMUSG00000000275	tripartite motif-containing 25
Afap1	1.82741	1.08062	0.21048	0.801257	Promoter (<=1kb)	35893335	35893734	5	35893465	35905693	12229	1	70292	ENSMUST00000146300.1	0	ENSMUSG00000029094	actin filament associated protein 1
Fam83f	3.73266	0.549036	0.210645	0.801257	Promoter (<=1kb)	80671581	80671980	15	80671847	80700425	28579	1	213956	ENSMUST00000023044.6	0	ENSMUSG00000022408	family with sequence similarity 83, member F
BC024139	0.385684	-1.52647	0.210716	0.801257	Promoter (<=1kb)	76124455	76124854	15	76124104	76125339	1236	2	271278	ENSMUST00000226663.1	485	ENSMUSG00000044361	cDNA sequence BC024139
Rif1	0	2.74473	0.210775	0.801257	Intron (ENSMUST00000112693.9/51869, intron 21 of 35)	52099762	52100161	2	52093195	52098444	5250	1	51869	ENSMUST00000125116.1	6567	ENSMUSG00000036202	replication timing regulatory factor 1
Anxa3	0	2.74473	0.210775	0.801257	Distal Intergenic	96861623	96862022	5	96841998	96845860	3863	1	11745	ENSMUST00000196126.1	19625	ENSMUSG00000029484	annexin A3
Gm10445	0	2.74473	0.210775	0.801257	Distal Intergenic	84475861	84476260	6	84412942	84423838	10897	2	100038556	ENSMUST00000203521.1	-52023	ENSMUSG00000107797	predicted gene 10445
Adssl1	3.58749	0.573942	0.210922	0.801319	Promoter (<=1kb)	112619916	112620315	12	112620045	112641339	21295	1	11565	ENSMUST00000021726.7	0	ENSMUSG00000011148	adenylosuccinate synthetase like 1
Zfand2b	1.83367	1.07619	0.211112	0.801549	Promoter (<=1kb)	75168489	75168888	1	75168646	75170752	2107	1	68818	ENSMUST00000162768.7	0	ENSMUSG00000026197	zinc finger, AN1 type domain 2B
Slc6a2	4.96056	0.323747	0.211317	0.801832	Promoter (<=1kb)	92961110	92961509	8	92960933	93001667	40735	1	20538	ENSMUST00000072939.7	177	ENSMUSG00000055368	solute carrier family 6 (neurotransmitter transporter, noradrenalin), member 2
Mgat4a	1.39867	-1.12634	0.211837	0.803307	Promoter (<=1kb)	37541257	37541656	1	37439340	37541016	101677	2	269181	ENSMUST00000151952.7	-241	ENSMUSG00000026110	mannoside acetylglucosaminyltransferase 4, isoenzyme A
Bmper	0	-1.98348	0.212131	0.803927	Distal Intergenic	23039400	23039799	9	23223076	23485200	262125	1	73230	ENSMUST00000071982.6	-183277	ENSMUSG00000031963	BMP-binding endothelial regulator
Prkch	3.988	0.489717	0.212663	0.804079	Promoter (<=1kb)	73585465	73585864	12	73584843	73761542	176700	1	18755	ENSMUST00000119092.1	622	ENSMUSG00000021108	protein kinase C, eta
Abt1	2.25617	0.894007	0.212709	0.804079	Distal Intergenic	23411138	23411537	13	23418361	23423866	5506	2	30946	ENSMUST00000041782.3	12329	ENSMUSG00000036376	activator of basal transcription 1
Castor1	3.43325	0.605342	0.212728	0.804079	Promoter (<=1kb)	4218251	4218650	11	4218225	4222409	4185	1	71962	ENSMUST00000020699.3	26	ENSMUSG00000020424	cytosolic arginine sensor for mTORC1 subunit 1
Fbxl16	1.84481	1.07096	0.212807	0.804079	Promoter (<=1kb)	25809561	25809960	17	25809085	25821255	12171	1	214931	ENSMUST00000045692.8	476	ENSMUSG00000025738	F-box and leucine-rich repeat protein 16
Fgf23	2.64581	-0.697349	0.212825	0.804079	Exon (ENSMUST00000000186.8/64654, exon 3 of 3)	127079935	127080334	6	127072902	127081408	8507	1	64654	ENSMUST00000000186.8	7033	ENSMUSG00000000182	fibroblast growth factor 23
B4galnt4	2.46618	-0.739651	0.212987	0.804195	Promoter (<=1kb)	141060769	141061168	7	141061104	141072400	11297	1	330671	ENSMUST00000048002.6	0	ENSMUSG00000055629	beta-1,4-N-acetyl-galactosaminyl transferase 4
9330198I05Rik	6.4875	0.268637	0.21312	0.804203	Exon (ENSMUST00000197854.1/ENSMUST00000197854.1, exon 2 of 3)	108367984	108368383	5	108360187	108363885	3699	1	77560	ENSMUST00000196846.1	7797	NA	RIKEN cDNA 9330198I05 gene
Bcar1	0.403396	-1.52543	0.213443	0.80476	Promoter (3-4kb)	111736000	111736399	8	111710477	111732136	21660	2	12927	ENSMUST00000212349.1	-3864	ENSMUSG00000031955	breast cancer anti-estrogen resistance 1
Tcf24	5.94807	0.269888	0.213773	0.80476	Promoter (<=1kb)	9967849	9968248	1	9960163	9967932	7770	2	100039596	ENSMUST00000185184.1	0	ENSMUSG00000099032	transcription factor 24
Kif19a	1.61464	1.1993	0.213821	0.80476	Promoter (<=1kb)	114765616	114766015	11	114765389	114790575	25187	1	286942	ENSMUST00000084368.11	227	ENSMUSG00000010021	kinesin family member 19A
Gnas	5.99728	0.269093	0.214069	0.80476	Promoter (<=1kb)	174285659	174286058	2	174285358	174338084	52727	1	14683	ENSMUST00000130761.7	301	ENSMUSG00000027523	GNAS (guanine nucleotide binding protein, alpha stimulating) complex locus
Osr1	7.34266	0.258118	0.214292	0.80476	Promoter (4-5kb)	9578899	9579298	12	9574441	9581500	7060	1	23967	ENSMUST00000057021.8	4458	ENSMUSG00000048387	odd-skipped related transcription factor 1
Cldn10	3.81879	0.522082	0.214311	0.80476	Promoter (<=1kb)	118854801	118855200	14	118854732	118875489	20758	1	58187	ENSMUST00000100314.3	69	ENSMUSG00000022132	claudin 10
Kcnj5	3.85064	0.517237	0.214381	0.80476	Promoter (<=1kb)	32343911	32344310	9	32315900	32344237	28338	2	16521	ENSMUST00000216033.1	0	ENSMUSG00000032034	potassium inwardly-rectifying channel, subfamily J, member 5
Hsd17b3	1.20215	1.39847	0.21446	0.80476	Distal Intergenic	63983240	63983639	13	64058284	64063133	4850	2	15487	ENSMUST00000221513.1	79494	ENSMUSG00000033122	hydroxysteroid (17-beta) dehydrogenase 3
Gm30731	2.65039	-0.691835	0.214573	0.80476	Promoter (<=1kb)	22489631	22490030	4	22490548	22493126	2579	1	105500046	ENSMUST00000203909.1	-518	ENSMUSG00000107859	predicted gene, 30731
Lrp1	0.0057649	-1.70765	0.214584	0.80476	Promoter (4-5kb)	127554812	127555211	10	127546395	127549917	3523	2	16971	ENSMUST00000129727.1	-4895	ENSMUSG00000040249	low density lipoprotein receptor-related protein 1
Mycl	2.26863	0.890347	0.214795	0.80476	Distal Intergenic	122983535	122983934	4	122995652	122996739	1088	1	16918	ENSMUST00000144998.1	-11718	ENSMUSG00000028654	v-myc avian myelocytomatosis viral oncogene lung carcinoma derived
Plekha2	2.24468	0.898619	0.215103	0.80476	Intron (ENSMUST00000064883.13/83436, intron 3 of 11)	25066480	25066879	8	25062433	25091346	28914	2	83436	ENSMUST00000125466.1	24467	ENSMUSG00000031557	pleckstrin homology domain-containing, family A (phosphoinositide binding specific) member 2
Slc38a1	0.584752	1.77887	0.215206	0.80476	Intron (ENSMUST00000088454.12/105727, intron 4 of 15)	96603070	96603469	15	96578534	96579584	1051	2	105727	ENSMUST00000230607.1	-23486	ENSMUSG00000023169	solute carrier family 38, member 1
Epb41	5.52212	-0.274852	0.215371	0.80476	Promoter (<=1kb)	132074819	132075218	4	132003776	132075264	71489	2	269587	ENSMUST00000131953.1	46	ENSMUSG00000028906	erythrocyte membrane protein band 4.1
Hnrnpul1	2.45298	-0.736514	0.215372	0.80476	Promoter (<=1kb)	25754894	25755293	7	25721165	25754757	33593	2	232989	ENSMUST00000206832.1	-137	ENSMUSG00000040725	heterogeneous nuclear ribonucleoprotein U-like 1
Gm833	0.0280928	-1.70585	0.215382	0.80476	Distal Intergenic	153016056	153016455	4	152697540	152700515	2976	1	330004	ENSMUST00000143133.1	318516	NA	predicted gene 833
Nfix	8.90153	0.222504	0.215497	0.80476	Intron (ENSMUST00000076715.12/18032, intron 1 of 8)	84785150	84785549	8	84708626	84774369	65744	2	18032	ENSMUST00000109762.7	-10781	ENSMUSG00000001911	nuclear factor I/X
Ramp1	2.44312	0.82497	0.215665	0.80476	Promoter (<=1kb)	91179450	91179849	1	91179822	91206790	26969	1	51801	ENSMUST00000165855.7	0	ENSMUSG00000034353	receptor (calcitonin) activity modifying protein 1
Abcg8	2.07209	0.962694	0.215762	0.80476	Promoter (<=1kb)	84675583	84675982	17	84676302	84699333	23032	1	67470	ENSMUST00000170725.7	-320	ENSMUSG00000024254	ATP binding cassette subfamily G member 8
Pou5f1	3.19729	0.644622	0.215886	0.80476	Promoter (<=1kb)	35506494	35506893	17	35506018	35510772	4755	1	18999	ENSMUST00000025271.16	476	ENSMUSG00000024406	POU domain, class 5, transcription factor 1
Pitpnm1	3.57516	0.569018	0.216103	0.805084	Promoter (<=1kb)	4100750	4101149	19	4100622	4113965	13344	1	18739	ENSMUST00000100022.3	128	ENSMUSG00000024851	phosphatidylinositol transfer protein, membrane-associated 1
Pou4f1	1.94591	-0.883134	0.216897	0.805606	Intron (ENSMUST00000228095.1/ENSMUST00000228095.1, intron 2 of 4)	104298218	104298617	14	104463973	104465365	1393	2	18996	ENSMUST00000139505.1	166748	ENSMUSG00000048349	POU domain, class 4, transcription factor 1
Rgs11	5.18521	0.297033	0.217809	0.805606	Promoter (<=1kb)	26202634	26203033	17	26202951	26211315	8365	1	50782	ENSMUST00000152676.7	0	ENSMUSG00000024186	regulator of G-protein signaling 11
Cacna1h	4.80556	0.341532	0.21794	0.805606	Intron (ENSMUST00000159610.7/58226, intron 2 of 34)	25402389	25402788	17	25388240	25389472	1233	2	58226	ENSMUST00000162820.1	-12917	ENSMUSG00000024112	calcium channel, voltage-dependent, T type, alpha 1H subunit
Clic6	0	-2.33652	0.218127	0.805606	Distal Intergenic	92562545	92562944	16	92498134	92541243	43110	1	209195	ENSMUST00000023670.3	64411	ENSMUSG00000022949	chloride intracellular channel 6
Tnrc6a	0	-2.33652	0.218127	0.805606	Distal Intergenic	123022258	123022657	7	123031374	123169678	138305	1	233833	ENSMUST00000211170.1	-8717	ENSMUSG00000052707	trinucleotide repeat containing 6a
Myod1	6.00948	0.268676	0.21813	0.805606	Promoter (<=1kb)	46376898	46377297	7	46376474	46379099	2626	1	17927	ENSMUST00000072514.2	424	ENSMUSG00000009471	myogenic differentiation 1
4933412E24Rik	0.410934	-1.50736	0.218286	0.805606	Distal Intergenic	59976421	59976820	15	60014866	60016613	1748	2	71088	ENSMUST00000096421.3	39793	ENSMUSG00000071749	RIKEN cDNA 4933412E24 gene
Anks1b	4.87271	0.332492	0.218412	0.805606	Promoter (<=1kb)	90830660	90831059	10	90829843	90921338	91496	1	77531	ENSMUST00000183145.1	817	ENSMUSG00000058589	ankyrin repeat and sterile alpha motif domain containing 1B
Psmb7	0.571916	1.76481	0.218452	0.805606	Exon (ENSMUST00000118797.1/ENSMUST00000118797.1, exon 1 of 18)	38671152	38671551	2	38588036	38644087	56052	2	19177	ENSMUST00000028083.5	-27065	ENSMUSG00000026750	proteasome (prosome, macropain) subunit, beta type 7
Hspa1a	4.1514	0.45516	0.218503	0.805606	Promoter (2-3kb)	34969317	34969716	17	34969190	34972156	2967	2	193740	ENSMUST00000087328.3	2440	ENSMUSG00000091971	heat shock protein 1A
Gdf10	5.03029	-0.298239	0.218606	0.805606	Promoter (<=1kb)	33923560	33923959	14	33923587	33937983	14397	1	14560	ENSMUST00000168727.2	0	ENSMUSG00000021943	growth differentiation factor 10
Aanat	1.34724	-1.10989	0.218652	0.805606	Promoter (1-2kb)	116597027	116597426	11	116595771	116596265	495	1	11298	ENSMUST00000132601.1	1256	ENSMUSG00000020804	arylalkylamine N-acetyltransferase
Slc17a6	6.57063	0.268542	0.21873	0.805606	Promoter (<=1kb)	51625804	51626203	7	51625148	51646221	21074	1	140919	ENSMUST00000207375.1	656	ENSMUSG00000030500	solute carrier family 17 (sodium-dependent inorganic phosphate cotransporter), member 6
Abhd3	2.65695	-0.689407	0.218942	0.805606	Promoter (<=1kb)	10706393	10706792	18	10642092	10706706	64615	2	106861	ENSMUST00000002549.8	0	ENSMUSG00000002475	abhydrolase domain containing 3
Klf1	2.46571	-0.730467	0.219037	0.805606	Promoter (1-2kb)	84903078	84903477	8	84901928	84905291	3364	1	16596	ENSMUST00000067060.8	1150	ENSMUSG00000054191	Kruppel-like factor 1 (erythroid)
Pthlh	1.82039	1.07238	0.21908	0.805606	Promoter (4-5kb)	147268408	147268807	6	147252109	147264183	12075	2	19227	ENSMUST00000204197.1	-4225	ENSMUSG00000048776	parathyroid hormone-like peptide
Htr5b	2.97161	0.68352	0.219147	0.805606	Promoter (<=1kb)	121527169	121527568	1	121509842	121528465	18624	2	15564	ENSMUST00000055884.7	897	ENSMUSG00000050534	5-hydroxytryptamine (serotonin) receptor 5B
Ebf1	7.86563	-0.241531	0.219156	0.805606	Promoter (1-2kb)	44619971	44620370	11	44621761	44643459	21699	1	13591	ENSMUST00000138452.1	-1391	ENSMUSG00000057098	early B cell factor 1
Gng7	0	2.69061	0.219215	0.805606	Promoter (<=1kb)	81015431	81015830	10	80948624	81014945	66322	2	14708	ENSMUST00000117805.7	-486	ENSMUSG00000048240	guanine nucleotide binding protein (G protein), gamma 7
Gm5441	0	2.69061	0.219215	0.805606	Distal Intergenic	117394760	117395159	12	117279435	117337022	57588	2	432713	ENSMUST00000186454.1	-57738	ENSMUSG00000101930	predicted gene 5441
Gpr160	0	2.69061	0.219215	0.805606	Intron (ENSMUST00000108259.7/71862, intron 2 of 2)	30883537	30883936	3	30856143	30895821	39679	1	71862	ENSMUST00000147697.1	27394	ENSMUSG00000037661	G protein-coupled receptor 160
Crnde	0	2.69061	0.219215	0.805606	Promoter (1-2kb)	92345106	92345505	8	92326033	92346870	20838	2	71296	ENSMUST00000178064.8	1365	ENSMUSG00000031736	colorectal neoplasia differentially expressed (non-protein coding)
9630013K17Rik	2.06997	0.955499	0.219258	0.805606	Distal Intergenic	63952361	63952760	11	63964226	63968040	3815	1	78883	ENSMUST00000146915.1	-11466	ENSMUSG00000086359	RIKEN cDNA 9630013K17 gene
Srxn1	3.69888	0.542538	0.219554	0.805948	Exon (ENSMUST00000064061.3/545474, exon 2 of 2)	152093483	152093882	2	152105516	152109211	3696	1	76650	ENSMUST00000137751.1	-11634	ENSMUSG00000032802	sulfiredoxin 1 homolog (S. cerevisiae)
Rorb	2.22013	-0.78916	0.219613	0.805948	Promoter (1-2kb)	19108986	19109385	19	18930605	19111196	180592	2	225998	ENSMUST00000112832.7	1811	ENSMUSG00000036192	RAR-related orphan receptor beta
Myrf	2.60036	-0.701017	0.219762	0.806012	Promoter (<=1kb)	10240149	10240548	19	10210385	10240604	30220	2	225908	ENSMUST00000189897.1	56	ENSMUSG00000036098	myelin regulatory factor
Chst1	1.72089	-0.944463	0.220152	0.806512	Promoter (<=1kb)	92600299	92600698	2	92599707	92615250	15544	1	76969	ENSMUST00000065797.6	592	ENSMUSG00000027221	carbohydrate sulfotransferase 1
Lbx1	8.21546	-0.233083	0.220161	0.806512	Downstream (1-2kb)	45230340	45230739	19	45232684	45235812	3129	2	16814	ENSMUST00000099401.5	5073	ENSMUSG00000025216	ladybird homeobox 1
B930092H01Rik	1.30738	-1.10139	0.220584	0.807443	Intron (ENSMUST00000213377.1/622037, intron 3 of 4)	61281565	61281964	9	61259227	61293809	34583	2	622037	ENSMUST00000213377.1	11845	ENSMUSG00000111658	RIKEN cDNA B930092H01 gene
Crabp1	6.28656	0.26596	0.220677	0.807443	Promoter (<=1kb)	54765327	54765726	9	54764748	54773110	8363	1	12903	ENSMUST00000034830.8	579	ENSMUSG00000032291	cellular retinoic acid binding protein I
4930512J16Rik	0.421199	-1.49372	0.220994	0.808119	Distal Intergenic	89294144	89294543	6	89269511	89285725	16215	2	75131	ENSMUST00000203704.1	-8419	ENSMUSG00000107622	RIKEN cDNA 4930512J16 gene
Lhfpl2	3.08441	0.660376	0.22124	0.808502	Promoter (<=1kb)	94057950	94058349	13	94057832	94123974	66143	1	218454	ENSMUST00000144838.1	118	ENSMUSG00000045312	lipoma HMGIC fusion partner-like 2
Gm19410	3.47899	0.584031	0.221368	0.808502	Promoter (<=1kb)	35765772	35766171	8	35765790	35818047	52258	1	100502846	ENSMUST00000207505.1	0	ENSMUSG00000109372	predicted gene, 19410
Sult2b1	3.0432	0.665559	0.221513	0.808502	Promoter (<=1kb)	45759190	45759589	7	45758474	45759530	1057	2	54200	ENSMUST00000209464.1	0	ENSMUSG00000003271	sulfotransferase family, cytosolic, 2B, member 1
Tbc1d14	2.67163	-0.681855	0.222018	0.808502	Promoter (<=1kb)	36581875	36582274	5	36490604	36581803	91200	2	100855	ENSMUST00000136189.7	-72	ENSMUSG00000029192	TBC1 domain family, member 14
Tnfaip8l3	2.56972	-0.706575	0.222138	0.808502	Promoter (<=1kb)	54067680	54068079	9	54067355	54068372	1018	2	244882	ENSMUST00000214656.1	293	ENSMUSG00000074345	tumor necrosis factor, alpha-induced protein 8-like 3
Syk	0.587914	1.7507	0.22249	0.808502	Distal Intergenic	52561072	52561471	13	52583173	52648792	65620	1	20963	ENSMUST00000120135.7	-21702	ENSMUSG00000021457	spleen tyrosine kinase
Cox7a2l	3.20568	0.635684	0.222509	0.808502	Distal Intergenic	83546481	83546880	17	83502330	83517330	15001	2	20463	ENSMUST00000234258.1	-29151	ENSMUSG00000024248	cytochrome c oxidase subunit 7A2 like
Trank1	5.44913	0.278173	0.222666	0.808502	Promoter (<=1kb)	111311625	111312024	9	111311739	111395775	84037	1	320429	ENSMUST00000078626.7	0	ENSMUSG00000062296	tetratricopeptide repeat and ankyrin repeat containing 1
Adam33	6.69349	0.262705	0.223306	0.808502	Promoter (<=1kb)	131055045	131055444	2	131053522	131054529	1008	2	110751	ENSMUST00000132071.1	-516	ENSMUSG00000027318	a disintegrin and metallopeptidase domain 33
Sall4	1.18044	1.39643	0.223382	0.808502	Distal Intergenic	168809400	168809799	2	168756614	168767943	11330	2	99377	ENSMUST00000125138.1	-41457	ENSMUSG00000027547	spalt like transcription factor 4
Bdkrb2	4.04506	0.469561	0.223534	0.808502	Promoter (<=1kb)	105563134	105563533	12	105563226	105595237	32012	1	12062	ENSMUST00000001652.6	0	ENSMUSG00000021070	bradykinin receptor, beta 2
Ankrd34a	3.7865	-0.484149	0.223656	0.808502	Promoter (<=1kb)	96596381	96596780	3	96596636	96599775	3140	1	545554	ENSMUST00000058943.7	0	ENSMUSG00000049097	ankyrin repeat domain 34A
Hspa8	3.66492	-0.515186	0.223779	0.808502	Promoter (<=1kb)	40800837	40801236	9	40800984	40805200	4217	1	15481	ENSMUST00000015800.15	0	ENSMUSG00000015656	heat shock protein 8
Gphn	0	-2.27817	0.223937	0.808502	Intron (ENSMUST00000052472.5/268566, intron 19 of 23)	78661982	78662381	12	78682647	78684093	1447	1	268566	ENSMUST00000219629.1	-20266	ENSMUSG00000047454	gephyrin
Tars	0	-2.27817	0.223937	0.808502	Distal Intergenic	11429039	11429438	15	11382301	11399665	17365	2	110960	ENSMUST00000022849.6	-29374	ENSMUSG00000022241	threonyl-tRNA synthetase
Hunk	0	-2.27817	0.223937	0.808502	Promoter (1-2kb)	90384184	90384583	16	90386013	90499553	113541	1	26559	ENSMUST00000065856.7	-1430	ENSMUSG00000053414	hormonally upregulated Neu-associated kinase
Slc45a1	0	-2.27817	0.223937	0.808502	Distal Intergenic	150727331	150727730	4	150628572	150652174	23603	2	242773	ENSMUST00000037827.9	-75157	ENSMUSG00000039838	solute carrier family 45, member 1
2310034O05Rik	0	-2.27817	0.223937	0.808502	Intron (ENSMUST00000150506.1/ENSMUST00000150506.1, intron 4 of 4)	100223099	100223498	5	100210708	100216741	6034	1	69571	ENSMUST00000188902.1	12391	ENSMUSG00000100157	RIKEN cDNA 2310034O05 gene
Tbx5	0	-2.27817	0.223937	0.808502	Distal Intergenic	119767766	119768165	5	119832668	119840886	8219	1	21388	ENSMUST00000202723.3	-64503	ENSMUSG00000018263	T-box 5
Efnb2	0	-2.27817	0.223937	0.808502	Distal Intergenic	7317966	7318365	8	8620597	8639363	18767	2	13642	ENSMUST00000152698.1	1320998	ENSMUSG00000001300	ephrin B2
Isyna1	0	-2.27817	0.223937	0.808502	Promoter (<=1kb)	70596048	70596447	8	70595967	70596767	801	1	71780	ENSMUST00000211773.1	81	ENSMUSG00000019139	myo-inositol 1-phosphate synthase A1
Pltp	4.37183	0.407818	0.223992	0.808502	Promoter (<=1kb)	164857182	164857581	2	164839518	164857542	18025	2	18830	ENSMUST00000109316.7	0	ENSMUSG00000017754	phospholipid transfer protein
1700057H15Rik	1.54873	1.18275	0.224244	0.808937	Distal Intergenic	124255195	124255594	4	124450235	124451285	1051	2	78460	ENSMUST00000156566.1	195691	NA	RIKEN cDNA 1700057H15 gene
Zfhx3	2.13599	-0.817581	0.224544	0.809536	Intron (ENSMUST00000220518.1/11906, intron 1 of 15)	107950705	107951104	8	107942644	108961630	1018987	1	11906	ENSMUST00000220518.1	8061	ENSMUSG00000038872	zinc finger homeobox 3
Pi16	3.85672	0.505598	0.224688	0.809536	Promoter (2-3kb)	29322128	29322527	17	29319240	29325928	6689	1	74116	ENSMUST00000234618.1	2888	ENSMUSG00000024011	peptidase inhibitor 16
Gm10710	6.52605	0.262232	0.224805	0.809536	Promoter (<=1kb)	83128940	83129339	3	83125276	83129246	3971	2	100038599	ENSMUST00000047876.6	0	ENSMUSG00000074517	predicted gene 10710
Gramd1b	2.3467	-0.758557	0.225171	0.809901	Promoter (<=1kb)	40455450	40455849	9	40293233	40455764	162532	2	235283	ENSMUST00000045682.6	0	ENSMUSG00000040111	GRAM domain containing 1B
Eef1a1	2.24673	-0.781438	0.225256	0.809901	Promoter (<=1kb)	78481775	78482174	9	78478449	78481724	3276	2	13627	ENSMUST00000042235.14	-51	ENSMUSG00000037742	eukaryotic translation elongation factor 1 alpha 1
Cntn4	1.52862	1.18308	0.225361	0.809901	Promoter (3-4kb)	106517104	106517503	6	106513558	106697756	184199	1	269784	ENSMUST00000132395.3	3546	ENSMUSG00000064293	contactin 4
Cds1	4.36461	0.405584	0.225522	0.809901	Promoter (<=1kb)	101765548	101765947	5	101765130	101823858	58729	1	74596	ENSMUST00000031273.8	418	ENSMUSG00000029330	CDP-diacylglycerol synthase 1
Tgfbr3	6.21667	-0.26252	0.225728	0.809901	Promoter (<=1kb)	107288780	107289179	5	107147980	107289595	141616	2	21814	ENSMUST00000146591.1	416	ENSMUSG00000029287	transforming growth factor, beta receptor III
Slc7a14	0.575145	1.73657	0.225829	0.809901	Promoter (1-2kb)	31308511	31308910	3	31202858	31310378	107521	2	241919	ENSMUST00000091259.8	1468	ENSMUSG00000069072	solute carrier family 7 (cationic amino acid transporter, y+ system), member 14
Kcnj11	0.575145	1.73657	0.225829	0.809901	Promoter (<=1kb)	46100331	46100730	7	46099420	46100658	1239	2	16514	ENSMUST00000209291.1	0	ENSMUSG00000096146	potassium inwardly rectifying channel, subfamily J, member 11
C2cd4d	2.51213	-0.716089	0.226165	0.810406	Promoter (1-2kb)	94364073	94364472	3	94362438	94364566	2129	1	271944	ENSMUST00000169433.2	1635	ENSMUSG00000091648	C2 calcium-dependent domain containing 4D
Fzd5	5.3951	-0.271441	0.226234	0.810406	Promoter (1-2kb)	64735569	64735968	1	64734469	64737749	3281	2	14367	ENSMUST00000116133.3	1781	ENSMUSG00000045005	frizzled class receptor 5
Syt12	4.86135	-0.310891	0.226545	0.810751	Promoter (<=1kb)	4476518	4476917	19	4456837	4477126	20290	2	171180	ENSMUST00000166191.1	209	ENSMUSG00000049303	synaptotagmin XII
Bahcc1	2.33131	-0.751728	0.226597	0.810751	Promoter (<=1kb)	120232629	120233028	11	120232947	120292282	59336	1	268515	ENSMUST00000122148.7	0	ENSMUSG00000039741	BAH domain and coiled-coil containing 1
Eef1a2	2.21447	-0.777002	0.226753	0.810751	Promoter (1-2kb)	181155549	181155948	2	181147653	181157014	9362	2	13628	ENSMUST00000055990.7	1066	ENSMUSG00000016349	eukaryotic translation elongation factor 1 alpha 2
Ndrg1	2.71961	0.727621	0.226857	0.810751	Promoter (<=1kb)	66969091	66969490	15	66943097	66969595	26499	2	17988	ENSMUST00000171266.7	105	ENSMUSG00000005125	N-myc downstream regulated gene 1
Cux2	1.70475	-0.937279	0.227379	0.81157	Promoter (<=1kb)	122047336	122047735	5	121860216	122047825	187610	2	13048	ENSMUST00000086317.11	90	ENSMUSG00000042589	cut-like homeobox 2
Lsm14b	2.95042	0.676518	0.227431	0.81157	Promoter (1-2kb)	180022661	180023060	2	180024987	180035461	10475	1	241846	ENSMUST00000055485.11	-1927	ENSMUSG00000039108	LSM family member 14B
Stum	4.58474	-0.343197	0.227482	0.81157	Promoter (<=1kb)	180482666	180483065	1	180437683	180483329	45647	2	381310	ENSMUST00000211561.1	264	ENSMUSG00000053963	mechanosensory transduction mediator
Ptprv	1.58889	1.16736	0.22777	0.812007	Promoter (1-2kb)	135129410	135129809	1	135126376	135128262	1887	2	13924	ENSMUST00000182387.1	-1148	ENSMUSG00000097993	protein tyrosine phosphatase, receptor type, V
Syt1	1.80972	1.04048	0.228076	0.812007	Intron (ENSMUST00000105276.7/20979, intron 10 of 11)	108582422	108582821	10	108627286	108636964	9679	2	20979	ENSMUST00000147593.1	54143	ENSMUSG00000035864	synaptotagmin I
Foxp4	6.09238	-0.258308	0.228094	0.812007	Distal Intergenic	47974607	47975006	17	47867133	47924645	57513	2	74123	ENSMUST00000113265.7	-49962	ENSMUSG00000023991	forkhead box P4
Col23a1	1.35826	-1.08058	0.228237	0.812007	Promoter (<=1kb)	51290433	51290832	11	51289920	51583918	293999	1	237759	ENSMUST00000102765.8	513	ENSMUSG00000063564	collagen, type XXIII, alpha 1
Gm15270	2.24107	0.880058	0.228392	0.812007	Promoter (<=1kb)	24595667	24596066	10	24549447	24595817	46371	2	102638890	ENSMUST00000136908.7	0	NA	predicted gene 15270
Hcn4	2.93656	-0.619201	0.228398	0.812007	Promoter (<=1kb)	58823585	58823984	9	58823412	58863175	39764	1	330953	ENSMUST00000034889.9	173	ENSMUSG00000032338	hyperpolarization-activated, cyclic nucleotide-gated K+ 4
Fbxw4	3.46163	0.58061	0.228532	0.812016	Promoter (4-5kb)	45587349	45587748	19	45578795	45591842	13048	2	30838	ENSMUST00000160003.7	4094	ENSMUSG00000040913	F-box and WD-40 domain protein 4
Upf1	3.43575	-0.545195	0.228692	0.812116	Promoter (<=1kb)	70353363	70353762	8	70331525	70353278	21754	2	19704	ENSMUST00000075666.7	-85	ENSMUSG00000058301	UPF1 regulator of nonsense transcripts homolog (yeast)
Ovol2	7.38629	0.250673	0.229228	0.812361	Promoter (<=1kb)	144331453	144331852	2	144305175	144331695	26521	2	107586	ENSMUST00000103171.9	0	ENSMUSG00000037279	ovo like zinc finger 2
Ate1	2.04816	0.934188	0.229399	0.812361	Intron (ENSMUST00000124096.7/14183, intron 2 of 6)	130369221	130369620	7	130394345	130418790	24446	2	11907	ENSMUST00000208116.1	49170	ENSMUSG00000030850	arginyltransferase 1
Mideas	1.09674	-1.16219	0.229629	0.812361	Intron (ENSMUST00000046266.12/238317, intron 1 of 12)	84210776	84211175	12	84149176	84218881	69706	2	238317	ENSMUST00000046266.12	7706	ENSMUSG00000042507	mitotic deacetylase associated SANT domain protein
Lhx2	6.66274	-0.255151	0.22973	0.812361	Promoter (<=1kb)	38354550	38354949	2	38353802	38360089	6288	1	16870	ENSMUST00000175896.1	748	ENSMUSG00000000247	LIM homeobox protein 2
Shank1	6.03272	-0.256244	0.229822	0.812361	Promoter (<=1kb)	44336867	44337266	7	44336016	44343738	7723	1	243961	ENSMUST00000134470.7	851	ENSMUSG00000038738	SH3 and multiple ankyrin repeat domains 1
Ets1	2.6953	0.729504	0.230302	0.812361	Intron (ENSMUST00000183879.1/23871, intron 1 of 3)	32645870	32646269	9	32636248	32754994	118747	1	23871	ENSMUST00000238819.1	9622	ENSMUSG00000032035	E26 avian leukemia oncogene 1, 5' domain
Inppl1	2.2755	0.857818	0.230321	0.812361	Promoter (<=1kb)	101836886	101837285	7	101833789	101836965	3177	2	16332	ENSMUST00000209861.1	0	ENSMUSG00000032737	inositol polyphosphate phosphatase-like 1
Gabbr2	1.11938	1.38119	0.230591	0.812361	Intron (ENSMUST00000107749.3/242425, intron 13 of 18)	46698560	46698959	4	46664502	46688447	23946	2	242425	ENSMUST00000129328.2	-10113	ENSMUSG00000039809	gamma-aminobutyric acid (GABA) B receptor, 2
Rbfox3	6.14557	-0.25728	0.230638	0.812361	Promoter (<=1kb)	118570367	118570766	11	118502842	118569910	67069	2	52897	ENSMUST00000136551.2	-457	ENSMUSG00000025576	RNA binding protein, fox-1 homolog (C. elegans) 3
Irx3	4.19611	0.433215	0.2308	0.812361	Distal Intergenic	92065979	92066378	8	91798525	91802067	3543	2	16373	ENSMUST00000175795.3	-263912	ENSMUSG00000031734	Iroquois related homeobox 3
Ephx4	4.12546	-0.4172	0.23095	0.812361	Promoter (<=1kb)	107403588	107403987	5	107403775	107413528	9754	1	384214	ENSMUST00000161246.7	0	ENSMUSG00000033805	epoxide hydrolase 4
Lims2	2.81523	0.698845	0.23108	0.812361	Promoter (<=1kb)	31931282	31931681	18	31931325	31958619	27295	1	225341	ENSMUST00000025254.8	0	ENSMUSG00000024395	LIM and senescent cell antigen like domains 2
Nnmt	3.84072	0.502645	0.23109	0.812361	Distal Intergenic	48648264	48648663	9	48591877	48605153	13277	2	18113	ENSMUST00000119426.1	-43111	ENSMUSG00000032271	nicotinamide N-methyltransferase
Col27a1	5.82624	-0.258096	0.231379	0.812361	Promoter (<=1kb)	63214320	63214719	4	63214004	63292831	78828	1	373864	ENSMUST00000125504.7	316	ENSMUSG00000045672	collagen, type XXVII, alpha 1
Pld1	2.83781	0.692941	0.23138	0.812361	Promoter (<=1kb)	27938763	27939162	3	27938695	28133239	194545	1	18805	ENSMUST00000120834.7	68	ENSMUSG00000027695	phospholipase D1
Mapkapk2	2.57533	-0.686935	0.231406	0.812361	Exon (ENSMUST00000191688.1/ENSMUST00000191688.1, exon 1 of 1)	131090409	131090808	1	131053700	131097826	44127	2	17164	ENSMUST00000016672.10	7018	ENSMUSG00000016528	MAP kinase-activated protein kinase 2
Slc66a2	4.41035	-0.369595	0.231608	0.812361	Exon (ENSMUST00000077962.7/240444, exon 4 of 4)	80295740	80296139	18	80262840	80263485	646	1	66943	ENSMUST00000155039.1	32900	ENSMUSG00000034006	solute carrier family 66 member 2
Lrrc32	0.564545	1.72505	0.231693	0.812361	Distal Intergenic	98527676	98528075	7	98494222	98501831	7610	1	434215	ENSMUST00000165205.1	33454	ENSMUSG00000090958	leucine rich repeat containing 32
Slc35c1	1.44675	-1.04943	0.231694	0.812361	Intron (ENSMUST00000141341.1/ENSMUST00000141341.1, intron 1 of 1)	92484772	92485171	2	92452767	92460538	7772	2	228368	ENSMUST00000125276.1	-24234	ENSMUSG00000049922	solute carrier family 35, member C1
Rap1gap	1.11429	-1.15497	0.231787	0.812361	Promoter (<=1kb)	137708516	137708915	4	137707522	137729861	22340	1	110351	ENSMUST00000097837.10	994	ENSMUSG00000041351	Rap1 GTPase-activating protein
Zcchc14	2.82107	-0.64096	0.231872	0.812361	Promoter (<=1kb)	121652832	121653231	8	121598703	121652901	54199	2	142682	ENSMUST00000046386.4	0	ENSMUSG00000061410	zinc finger, CCHC domain containing 14
Ccdc32	1.95596	-0.850084	0.232236	0.812361	Distal Intergenic	118996289	118996688	2	119021805	119029377	7573	2	269336	ENSMUST00000110833.1	32689	ENSMUSG00000039983	coiled-coil domain containing 32
Kpnb1	3.46946	-0.536168	0.232284	0.812361	Promoter (<=1kb)	97187990	97188389	11	97159714	97187881	28168	2	16211	ENSMUST00000001479.4	-109	ENSMUSG00000001440	karyopherin (importin) beta 1
Prph	6.95437	0.255817	0.23241	0.812361	Promoter (<=1kb)	99055530	99055929	15	99055970	99056874	905	1	19132	ENSMUST00000229268.1	-41	ENSMUSG00000023484	peripherin
Ranbp10	3.13505	-0.593093	0.232545	0.812361	Promoter (<=1kb)	105827166	105827565	8	105768308	105827350	59043	2	74334	ENSMUST00000041400.5	0	ENSMUSG00000037415	RAN binding protein 10
Parp1	1.80399	-0.902908	0.232643	0.812361	Distal Intergenic	180548180	180548579	1	180568924	180579161	10238	1	11545	ENSMUST00000194608.1	-20345	ENSMUSG00000026496	poly (ADP-ribose) polymerase family, member 1
Mast4	4.41821	0.386732	0.232937	0.812361	Promoter (<=1kb)	103333465	103333864	13	102732486	103334192	601707	2	328329	ENSMUST00000166726.7	328	ENSMUSG00000034751	microtubule associated serine/threonine kinase family member 4
Rap1gap2	4.66449	-0.331143	0.233075	0.812361	Promoter (<=1kb)	74589604	74590003	11	74437043	74590124	153082	2	380711	ENSMUST00000145524.1	121	ENSMUSG00000038807	RAP1 GTPase activating protein 2
Hrh1	3.05236	0.645818	0.233129	0.812361	Promoter (<=1kb)	114398218	114398617	6	114398086	114479866	81781	1	15465	ENSMUST00000160212.1	132	ENSMUSG00000053004	histamine receptor H1
Usp2	2.88751	-0.625428	0.233154	0.812361	Promoter (<=1kb)	44084672	44085071	9	44084939	44094477	9539	1	53376	ENSMUST00000065461.8	0	ENSMUSG00000032010	ubiquitin specific peptidase 2
9530059O14Rik	1.78446	1.02918	0.233326	0.812361	Distal Intergenic	122549506	122549905	9	122572499	122678965	106467	1	319626	ENSMUST00000181682.8	-22594	ENSMUSG00000097736	RIKEN cDNA 9530059O14 gene
Got1	3.97677	-0.441308	0.233445	0.812361	Promoter (<=1kb)	43524466	43524865	19	43499752	43524605	24854	2	14718	ENSMUST00000026196.13	0	ENSMUSG00000025190	glutamic-oxaloacetic transaminase 1, soluble
Dkk1	6.90251	0.254697	0.233468	0.812361	Promoter (<=1kb)	30548801	30549200	19	30545863	30549665	3803	2	13380	ENSMUST00000025803.8	465	ENSMUSG00000024868	dickkopf WNT signaling pathway inhibitor 1
Vgll4	2.48725	-0.703004	0.233469	0.812361	Intron (ENSMUST00000147639.7/232334, intron 2 of 5)	114954234	114954633	6	114862321	114969180	106860	2	232334	ENSMUST00000147639.7	14547	ENSMUSG00000030315	vestigial like family member 4
Snhg11	3.09945	-0.592478	0.233727	0.812361	Promoter (<=1kb)	158375486	158375885	2	158375638	158386145	10508	1	319317	ENSMUST00000109488.7	0	ENSMUSG00000044349	small nucleolar RNA host gene 11
Nkx2-2os	8.49651	-0.218676	0.233751	0.812361	Promoter (<=1kb)	147183874	147184273	2	147184083	147331681	147599	1	100313531	ENSMUST00000136998.2	0	ENSMUSG00000086509	NK2 homeobox 2, opposite strand
Nav2	2.22864	0.860697	0.233761	0.812361	Intron (ENSMUST00000183659.7/78286, intron 4 of 39)	49377282	49377681	7	49364721	49454642	89922	1	78286	ENSMUST00000064383.6	12561	ENSMUSG00000052512	neuron navigator 2
Uba52	3.02918	-0.599162	0.233783	0.812361	Promoter (<=1kb)	70510232	70510631	8	70508263	70510350	2088	2	22186	ENSMUST00000140679.7	0	ENSMUSG00000090137	ubiquitin A-52 residue ribosomal protein fusion product 1
Cfc1	5.36708	0.275816	0.233968	0.812542	Promoter (1-2kb)	34537126	34537525	1	34535648	34544313	8666	1	12627	ENSMUST00000027298.4	1478	ENSMUSG00000026124	cripto, FRL-1, cryptic family 1
Psd2	1.8288	1.02036	0.234311	0.812667	Promoter (<=1kb)	35965904	35966303	18	35965105	36014674	49570	1	74002	ENSMUST00000175734.1	799	ENSMUSG00000024347	pleckstrin and Sec7 domain containing 2
Hoxb13	8.54748	-0.217942	0.234335	0.812667	Promoter (1-2kb)	96195681	96196080	11	96194316	96197447	3132	1	15408	ENSMUST00000062709.3	1365	ENSMUSG00000049604	homeobox B13
Zfp385c	2.02529	0.932199	0.2344	0.812667	Exon (ENSMUST00000207052.1/ENSMUST00000207052.1, exon 1 of 2)	100642981	100643380	11	100627543	100650693	23151	2	278304	ENSMUST00000103119.9	7313	ENSMUSG00000014198	zinc finger protein 385C
Shc2	3.08411	0.639731	0.234964	0.814163	Promoter (<=1kb)	79638024	79638423	10	79618652	79637918	19267	2	216148	ENSMUST00000020564.6	-106	ENSMUSG00000020312	SHC (Src homology 2 domain containing) transforming protein 2
Tgif1	4.52445	0.370239	0.235292	0.814324	Promoter (<=1kb)	70849646	70850045	17	70844205	70849790	5586	2	21815	ENSMUST00000172229.7	0	ENSMUSG00000047407	TGFB-induced factor homeobox 1
Csrnp1	2.42834	0.801987	0.235367	0.814324	Promoter (<=1kb)	119983147	119983546	9	119972081	119983023	10943	2	215418	ENSMUST00000214058.1	-124	ENSMUSG00000032515	cysteine-serine-rich nuclear protein 1
Foxd4	1.12217	1.36275	0.235432	0.814324	Distal Intergenic	24885804	24886203	19	24899236	24901197	1962	2	14237	ENSMUST00000058600.3	14994	ENSMUSG00000051490	forkhead box D4
Ptprtos	0.524804	1.71351	0.2356	0.814324	Intron (ENSMUST00000109443.7/19281, intron 2 of 30)	162333565	162333964	2	162390813	162393945	3133	1	77645	ENSMUST00000151688.1	-56849	ENSMUSG00000084919	protein tyrosine phosphatase, receptor type T, opposite strand
Ttc9b	1.12087	1.36113	0.235756	0.814324	Promoter (1-2kb)	27655643	27656042	7	27653915	27657346	3432	1	73032	ENSMUST00000008088.8	1728	ENSMUSG00000007944	tetratricopeptide repeat domain 9B
Eya2	2.23397	0.853008	0.235989	0.814324	Distal Intergenic	165563740	165564139	2	165595032	165771719	176688	1	14049	ENSMUST00000088132.12	-30893	ENSMUSG00000017897	EYA transcriptional coactivator and phosphatase 2
1700018B08Rik	2.03559	0.930078	0.236232	0.814324	Intron (ENSMUST00000127664.1/108148, intron 1 of 15)	121382475	121382874	8	121530828	121541869	11042	2	76405	ENSMUST00000182739.7	158995	ENSMUSG00000031809	RIKEN cDNA 1700018B08 gene
Gadd45g	4.56535	0.360782	0.236253	0.814324	Distal Intergenic	51853044	51853443	13	51846744	51848224	1481	1	23882	ENSMUST00000132480.1	6300	ENSMUSG00000021453	growth arrest and DNA-damage-inducible 45 gamma
Fam131c	1.82213	1.01766	0.236267	0.814324	Promoter (<=1kb)	141368144	141368543	4	141368220	141384175	15956	1	277743	ENSMUST00000006380.4	0	ENSMUSG00000006218	family with sequence similarity 131, member C
Mir129-1	2.03978	-0.812657	0.236706	0.814324	Exon (ENSMUST00000164104.2/ENSMUST00000164104.2, exon 1 of 2)	28981297	28981696	6	29022619	29022691	73	1	387237	ENSMUST00000083535.1	-40923	ENSMUSG00000065469	microRNA 129-1
Pappa	0	-1.62758	0.236819	0.814324	Intron (ENSMUST00000084501.3/18491, intron 9 of 21)	65250735	65251134	4	65124174	65357509	233336	1	18491	ENSMUST00000084501.3	126561	ENSMUSG00000028370	pregnancy-associated plasma protein A
Rasip1	0	-1.62758	0.236819	0.814324	Promoter (<=1kb)	45628125	45628524	7	45627488	45639093	11606	1	69903	ENSMUST00000057927.9	637	ENSMUSG00000044562	Ras interacting protein 1
Zfp385a	0.714243	-1.31147	0.236824	0.814324	Promoter (<=1kb)	103334219	103334618	15	103313895	103334327	20433	2	29813	ENSMUST00000229373.1	0	ENSMUSG00000000552	zinc finger protein 385A
Mtap	2.69233	0.726228	0.236943	0.814324	Promoter (<=1kb)	89137306	89137705	4	89137122	89181081	43960	1	66902	ENSMUST00000058030.9	184	ENSMUSG00000062937	methylthioadenosine phosphorylase
Gm4675	3.76205	0.509063	0.236998	0.814324	Distal Intergenic	118194951	118195350	14	118236232	118238759	2528	1	105245869	ENSMUST00000164755.1	-40882	ENSMUSG00000090534	predicted gene 4675
Ttyh2	2.41201	0.794547	0.237341	0.814506	Promoter (<=1kb)	114675980	114676379	11	114675516	114690603	15088	1	117160	ENSMUST00000141111.1	464	ENSMUSG00000034714	tweety family member 2
Rps6ka2	2.94844	-0.607141	0.237372	0.814506	Promoter (<=1kb)	7169698	7170097	17	7170115	7303315	133201	1	20112	ENSMUST00000024575.7	-18	ENSMUSG00000023809	ribosomal protein S6 kinase, polypeptide 2
Tlcd4	2.68475	-0.654333	0.237448	0.814506	Promoter (<=1kb)	121262742	121263141	3	121202008	121263314	61307	2	99887	ENSMUST00000128909.7	173	ENSMUSG00000028132	TLC domain containing 4
Runx3	0.538959	1.69666	0.237663	0.814788	Intron (ENSMUST00000056977.13/12399, intron 1 of 5)	135129269	135129668	4	135120652	135177990	57339	1	12399	ENSMUST00000056977.13	8617	ENSMUSG00000070691	runt related transcription factor 3
Myh14	0.511923	1.69931	0.238132	0.815423	Promoter (<=1kb)	44670216	44670615	7	44605803	44670843	65041	2	71960	ENSMUST00000048102.14	228	ENSMUSG00000030739	myosin, heavy polypeptide 14
Scara3	0.580283	1.6922	0.238193	0.815423	Promoter (1-2kb)	65952459	65952858	14	65919394	65953935	34542	2	219151	ENSMUST00000042046.4	1077	ENSMUSG00000034463	scavenger receptor class A, member 3
Slc34a3	1.5073	1.15785	0.238266	0.815423	Promoter (1-2kb)	25231537	25231936	2	25230782	25233046	2265	2	142681	ENSMUST00000124146.7	1110	ENSMUSG00000006469	solute carrier family 34 (sodium phosphate), member 3
Gm13205	5.90865	-0.252143	0.238851	0.815423	Promoter (3-4kb)	148952396	148952795	4	148947492	148948914	1423	2	108168987	ENSMUST00000123548.1	-3482	NA	predicted gene 13205
Unc5b	5.68347	-0.253963	0.238904	0.815423	Promoter (<=1kb)	60830405	60830804	10	60764577	60831382	66806	2	107449	ENSMUST00000218637.1	578	ENSMUSG00000020099	unc-5 netrin receptor B
Jakmip1	2.02871	0.920298	0.238979	0.815423	Distal Intergenic	37015719	37016118	5	37028335	37091447	63113	1	76071	ENSMUST00000173836.7	-12217	ENSMUSG00000063646	janus kinase and microtubule interacting protein 1
Ank1	2.01286	0.928652	0.239003	0.815423	Promoter (<=1kb)	23058491	23058890	8	23058525	23149688	91164	1	11733	ENSMUST00000173248.7	0	ENSMUSG00000031543	ankyrin 1, erythroid
Rerg	2.92128	-0.606858	0.239046	0.815423	Promoter (<=1kb)	137169296	137169695	6	137056099	137169685	113587	2	232441	ENSMUST00000119610.3	0	ENSMUSG00000030222	RAS-like, estrogen-regulated, growth-inhibitor
Elf2	4.123	0.435696	0.239097	0.815423	Distal Intergenic	51358643	51359042	3	51252720	51340663	87944	2	69257	ENSMUST00000194641.5	-17980	ENSMUSG00000037174	E74-like factor 2
Adgrb1	1.42893	-1.03051	0.239175	0.815423	Promoter (<=1kb)	74564263	74564662	15	74563901	74572861	8961	1	107831	ENSMUST00000187599.1	362	ENSMUSG00000034730	adhesion G protein-coupled receptor B1
Ppl	1.79848	-0.891665	0.239394	0.815716	Intron (ENSMUST00000035672.4/19041, intron 1 of 21)	5119663	5120062	16	5096969	5132410	35442	2	19041	ENSMUST00000230554.1	12348	ENSMUSG00000039457	periplakin
Lmbr1	2.05212	0.912784	0.23967	0.816206	Promoter (<=1kb)	29378116	29378515	5	29229802	29378384	148583	2	56873	ENSMUST00000055195.10	0	ENSMUSG00000010721	limb region 1
Tmem260	1.14061	1.34993	0.239967	0.816375	Intron (ENSMUST00000227146.1/ENSMUST00000227146.1, intron 3 of 3)	48541203	48541602	14	48472322	48496376	24055	1	218989	ENSMUST00000228697.1	68881	ENSMUSG00000036339	transmembrane protein 260
Cdon	1.48708	1.14964	0.240011	0.816375	Exon (ENSMUST00000119129.9/57810, exon 18 of 20)	35491548	35491947	9	35457478	35470085	12608	1	57810	ENSMUST00000127264.1	34070	ENSMUSG00000038119	cell adhesion molecule-related/down-regulated by oncogenes
Parm1	1.47946	1.15666	0.240231	0.816375	Promoter (<=1kb)	91518263	91518662	5	91517615	91626894	109280	1	231440	ENSMUST00000040576.9	648	ENSMUSG00000034981	prostate androgen-regulated mucin-like protein 1
4930557F10Rik	3.72425	0.51177	0.240287	0.816375	Promoter (2-3kb)	23310756	23311155	13	23276204	23313400	37197	2	75322	ENSMUST00000155432.1	2245	ENSMUSG00000085488	RIKEN cDNA 4930557F10 gene
Trim45	2.68785	-0.659624	0.240384	0.816375	Promoter (<=1kb)	100922098	100922497	3	100922202	100931702	9501	1	229644	ENSMUST00000094048.9	0	ENSMUSG00000033233	tripartite motif-containing 45
BC037704	4.59436	-0.334511	0.240635	0.816766	Promoter (<=1kb)	43675137	43675536	19	43675178	43677176	1999	1	100502982	ENSMUST00000236819.1	0	ENSMUSG00000117698	cDNA sequence BC037704
Ccn1	2.40999	0.788483	0.240765	0.816766	Promoter (2-3kb)	145652021	145652420	3	145646976	145649981	3006	2	16007	ENSMUST00000029846.4	-2040	ENSMUSG00000028195	cellular communication network factor 1
Clic4	3.15015	-0.570418	0.241076	0.817372	Promoter (<=1kb)	135272683	135273082	4	135213969	135272814	58846	2	29876	ENSMUST00000037099.8	0	ENSMUSG00000037242	chloride intracellular channel 4 (mitochondrial)
Nab2	4.16154	0.430945	0.241381	0.817533	Promoter (<=1kb)	127665155	127665554	10	127664925	127665481	557	2	17937	ENSMUST00000128780.1	0	ENSMUSG00000025402	Ngfi-A binding protein 2
Prtn3	2.80945	0.684193	0.24139	0.817533	Promoter (<=1kb)	79882517	79882916	10	79881783	79882880	1098	1	19152	ENSMUST00000171489.1	734	ENSMUSG00000057729	proteinase 3
Pde4dip	3.49951	0.55357	0.241555	0.817642	Promoter (<=1kb)	97824254	97824653	3	97796732	97824621	27890	2	83679	ENSMUST00000200232.2	0	ENSMUSG00000038170	phosphodiesterase 4D interacting protein (myomegalin)
Spock1	3.4708	-0.519417	0.241929	0.818135	Promoter (<=1kb)	57907632	57908031	13	57429295	57907587	478293	2	20745	ENSMUST00000172326.2	-45	ENSMUSG00000056222	sparc/osteonectin, cwcv and kazal-like domains proteoglycan 1
Ror1	2.95117	-0.600895	0.241978	0.818135	Promoter (<=1kb)	100096526	100096925	4	100095791	100444765	348975	1	26563	ENSMUST00000039630.5	735	ENSMUSG00000035305	receptor tyrosine kinase-like orphan receptor 1
Tac4	3.63307	0.525741	0.2421	0.818135	Exon (ENSMUST00000150818.1/ENSMUST00000150818.1, exon 2 of 2)	95223783	95224182	11	95261529	95269265	7737	1	93670	ENSMUST00000021242.4	-37347	ENSMUSG00000020872	tachykinin 4
LOC114841036	3.99012	-0.432454	0.242272	0.818268	Promoter (<=1kb)	6979913	6980312	19	6977747	6980250	2504	2	114841036	ENSMUST00000238181.1	0	ENSMUSG00000056629	Uncharacterized protein LOC114841036
Sptb	3.38096	0.571371	0.243267	0.820655	Promoter (<=1kb)	76709972	76710371	12	76596130	76710023	113894	2	20741	ENSMUST00000166101.1	0	ENSMUSG00000021061	spectrin beta, erythrocytic
4930441H08Rik	0.499048	1.6851	0.24335	0.820655	Intron (ENSMUST00000190004.1/ENSMUST00000190004.1, intron 1 of 2)	71382055	71382454	7	71909693	71939191	29499	1	78156	ENSMUST00000205699.1	-527239	ENSMUSG00000108669	RIKEN cDNA 4930441H08 gene
Pura	4.72998	0.330684	0.24351	0.820655	Promoter (3-4kb)	36284193	36284592	18	36281097	36292535	11439	1	19290	ENSMUST00000051301.5	3096	ENSMUSG00000043991	purine rich element binding protein A
Chsy3	1.78952	1.00347	0.243513	0.820655	Promoter (<=1kb)	59176192	59176591	18	59175650	59411336	235687	1	78923	ENSMUST00000080721.5	542	ENSMUSG00000058152	chondroitin sulfate synthase 3
Slc25a48	5.95567	0.252582	0.243713	0.820778	Promoter (<=1kb)	56438388	56438787	13	56438355	56474239	35885	1	328258	ENSMUST00000021971.5	33	ENSMUSG00000021509	solute carrier family 25, member 48
Ext2	0.844524	-1.23567	0.243817	0.820778	Intron (ENSMUST00000042078.9/11695, intron 2 of 3)	93673333	93673732	2	93703539	93704509	971	2	14043	ENSMUST00000144780.1	30777	ENSMUSG00000027198	exostosin glycosyltransferase 2
Tm6sf1	1.08686	1.34398	0.244088	0.820883	Promoter (<=1kb)	81860128	81860527	7	81859151	81884434	25284	1	107769	ENSMUST00000126334.7	977	ENSMUSG00000038623	transmembrane 6 superfamily member 1
Rbm47	4.71493	0.335928	0.24423	0.820883	Promoter (<=1kb)	66150847	66151246	5	66018602	66151078	132477	2	245945	ENSMUST00000094756.10	0	ENSMUSG00000070780	RNA binding motif protein 47
Pde4c	4.1648	-0.398418	0.244282	0.820883	Promoter (<=1kb)	70729856	70730255	8	70730112	70745893	15782	1	110385	ENSMUST00000134693.7	0	ENSMUSG00000031842	phosphodiesterase 4C, cAMP specific
Thsd4	0.865664	-1.22669	0.244618	0.820883	Intron (ENSMUST00000171654.7/207596, intron 5 of 16)	60307005	60307404	9	59969719	60141220	171502	2	207596	ENSMUST00000034829.5	-165785	ENSMUSG00000032289	thrombospondin, type I, domain containing 4
Tfap2b	7.1928	-0.242076	0.244683	0.820883	Promoter (<=1kb)	19212695	19213094	1	19212306	19214442	2137	1	21419	ENSMUST00000191068.1	389	ENSMUSG00000025927	transcription factor AP-2 beta
B4galnt4	1.08888	-1.12745	0.244759	0.820883	Promoter (<=1kb)	141069423	141069822	7	141070275	141070852	578	1	330671	ENSMUST00000211455.1	-453	ENSMUSG00000055629	beta-1,4-N-acetyl-galactosaminyl transferase 4
Spaca1	2.23194	0.841282	0.244833	0.820883	Distal Intergenic	34238484	34238883	4	34028314	34050191	21878	2	67652	ENSMUST00000029927.5	-188293	ENSMUSG00000028264	sperm acrosome associated 1
Syt7	2.21708	0.840976	0.244916	0.820883	Exon (ENSMUST00000169121.8/54525, exon 5 of 13)	10422486	10422885	19	10404018	10435667	31650	1	54525	ENSMUST00000235717.1	18468	ENSMUSG00000024743	synaptotagmin VII
Tdrd7	2.13904	-0.775305	0.245728	0.822622	Promoter (<=1kb)	45972375	45972774	4	45972834	45987622	14789	1	100121	ENSMUST00000151422.1	-60	ENSMUSG00000035517	tudor domain containing 7
Bnc2	4.81925	0.317315	0.246073	0.822622	Promoter (<=1kb)	84674968	84675367	4	84275095	84675034	399940	2	242509	ENSMUST00000102820.8	0	ENSMUSG00000028487	basonuclin 2
Klrg2	5.54674	0.261539	0.246159	0.822622	Promoter (<=1kb)	38636765	38637164	6	38625693	38637233	11541	2	74253	ENSMUST00000202245.3	69	ENSMUSG00000071537	killer cell lectin-like receptor subfamily G, member 2
Atf7	3.3257	0.579626	0.246168	0.822622	Promoter (<=1kb)	102625038	102625437	15	102523843	102625067	101225	2	223922	ENSMUST00000184772.1	0	ENSMUSG00000099083	activating transcription factor 7
Nav2	0.716281	-1.36954	0.246314	0.822622	Promoter (2-3kb)	49447963	49448362	7	49450760	49464580	13821	1	78286	ENSMUST00000184155.1	-2398	ENSMUSG00000052512	neuron navigator 2
Nog	2.35757	-0.713241	0.24641	0.822622	Promoter (<=1kb)	89301932	89302331	11	89300638	89302332	1695	2	18121	ENSMUST00000061728.4	1	ENSMUSG00000048616	noggin
Dusp15	5.66417	-0.251272	0.246483	0.822622	Exon (ENSMUST00000123121.8/252864, exon 7 of 7)	152942587	152942986	2	152940997	152951456	10460	2	252864	ENSMUST00000123121.8	8470	ENSMUSG00000042662	dual specificity phosphatase-like 15
Htr1d	4.79379	-0.310973	0.246631	0.822622	Promoter (<=1kb)	136424480	136424879	4	136424612	136441970	17359	1	15552	ENSMUST00000133818.1	0	ENSMUSG00000070687	5-hydroxytryptamine (serotonin) receptor 1D
Npw	5.54289	0.259312	0.246639	0.822622	Promoter (<=1kb)	24658036	24658435	17	24657405	24658425	1021	2	381073	ENSMUST00000213213.1	0	ENSMUSG00000071230	neuropeptide W
Smim12	2.11121	-0.774451	0.24713	0.823356	Intron (ENSMUST00000046659.13/242667, intron 8 of 11)	127224566	127224965	4	127243784	127247809	4026	1	80284	ENSMUST00000142029.1	-18819	ENSMUSG00000042380	small integral membrane protein 12
Ube2ql1	3.10232	-0.57173	0.24718	0.823356	Promoter (1-2kb)	69738132	69738531	13	69702832	69739889	37058	2	76980	ENSMUST00000065118.6	1358	ENSMUSG00000052981	ubiquitin-conjugating enzyme E2Q family-like 1
Epb41l4a	1.69704	-0.925173	0.247261	0.823356	Promoter (<=1kb)	34005630	34006029	18	33796327	34006919	210593	2	13824	ENSMUST00000025234.6	890	ENSMUSG00000024376	erythrocyte membrane protein band 4.1 like 4a
Dbx2	7.44419	0.238079	0.247561	0.823908	Promoter (1-2kb)	95653899	95654298	15	95623563	95655960	32398	2	223843	ENSMUST00000054244.6	1662	ENSMUSG00000045608	developing brain homeobox 2
Necab2	2.21864	0.833744	0.248176	0.825128	Intron (ENSMUST00000098363.9/117148, intron 8 of 12)	119465378	119465777	8	119452432	119470945	18514	1	117148	ENSMUST00000148328.1	12946	ENSMUSG00000031837	N-terminal EF-hand calcium binding protein 2
Htra4	6.89735	-0.244069	0.248242	0.825128	Promoter (<=1kb)	25038327	25038726	8	25024929	25038962	14034	2	330723	ENSMUST00000084031.5	236	ENSMUSG00000037406	HtrA serine peptidase 4
Syt2	7.10658	-0.243026	0.248383	0.825128	Promoter (<=1kb)	134646496	134646895	1	134646677	134741829	95153	1	20980	ENSMUST00000187725.6	0	ENSMUSG00000026452	synaptotagmin II
Ap2a2	0.554966	1.66368	0.248483	0.825128	Promoter (<=1kb)	141562181	141562580	7	141562208	141603156	40949	1	11772	ENSMUST00000201320.1	0	ENSMUSG00000002957	adaptor-related protein complex 2, alpha 2 subunit
Cytl1	2.38436	-0.710329	0.248599	0.825128	Distal Intergenic	37769210	37769609	5	37737280	37739815	2536	1	231162	ENSMUST00000201048.1	31930	ENSMUSG00000062329	cytokine-like 1
Lncppara	2.00793	-0.80961	0.248883	0.825476	Distal Intergenic	85626423	85626822	15	85653616	85707524	53909	1	102800312	ENSMUST00000230913.1	-26794	NA	long noncoding RNA near Ppara
Dmrt3	8.32615	-0.215384	0.249076	0.825476	Promoter (4-5kb)	25605823	25606222	19	25610537	25623921	13385	1	240590	ENSMUST00000048935.5	-4315	ENSMUSG00000042372	doublesex and mab-3 related transcription factor 3
Fam205c	1.79239	-0.867321	0.249141	0.825476	Distal Intergenic	42891271	42891670	4	42871688	42874234	2547	2	277773	ENSMUST00000144112.1	-17037	ENSMUSG00000050141	family with sequence similarity 205, member C
Slfn5	5.44337	0.263741	0.249262	0.825476	Promoter (<=1kb)	82952048	82952447	11	82952095	82960012	7918	1	327978	ENSMUST00000108158.8	0	ENSMUSG00000054404	schlafen 5
Vrk1	2.93083	0.648218	0.249613	0.825476	Distal Intergenic	105994536	105994935	12	106010228	106075220	64993	1	22367	ENSMUST00000072040.6	-15293	ENSMUSG00000021115	vaccinia related kinase 1
Swsap1	3.57141	-0.494616	0.249717	0.825476	Promoter (<=1kb)	21955758	21956157	9	21955755	21958264	2510	1	66962	ENSMUST00000053583.6	3	ENSMUSG00000051238	SWIM type zinc finger 7 associated protein 1
Trim9	2.58116	-0.6575	0.249901	0.825476	Promoter (<=1kb)	70346098	70346497	12	70247735	70347089	99355	2	94090	ENSMUST00000221294.1	592	ENSMUSG00000021071	tripartite motif-containing 9
4930594M22Rik	2.38353	0.781015	0.250024	0.825476	Promoter (<=1kb)	122913003	122913402	14	122913030	122927690	14661	1	105245866	ENSMUST00000100291.2	0	ENSMUSG00000075463	RIKEN cDNA 4930594M22 gene
Cbx2	3.33627	0.574261	0.250056	0.825476	Promoter (<=1kb)	119022883	119023282	11	119022962	119031270	8309	1	12416	ENSMUST00000026662.7	0	ENSMUSG00000025577	chromobox 2
Arid3b	2.84046	-0.607778	0.250677	0.825476	Promoter (<=1kb)	57836536	57836935	9	57790353	57836706	46354	2	56380	ENSMUST00000164010.7	0	ENSMUSG00000004661	AT rich interactive domain 3B (BRIGHT-like)
Btrc	3.71458	-0.471591	0.251	0.825476	Promoter (<=1kb)	45363420	45363819	19	45363734	45507736	144003	1	12234	ENSMUST00000223764.1	0	ENSMUSG00000025217	beta-transducin repeat containing protein
Cdc23	2.22216	0.832844	0.251052	0.825476	Distal Intergenic	34679407	34679806	18	34631683	34651735	20053	2	52563	ENSMUST00000133181.1	-27672	ENSMUSG00000024370	CDC23 cell division cycle 23
Eva1a	3.04826	0.622895	0.251219	0.825476	Promoter (<=1kb)	82041972	82042371	6	82041688	82047150	5463	1	232146	ENSMUST00000150691.1	284	ENSMUSG00000035104	eva-1 homolog A (C. elegans)
Ndufs6	2.01411	0.903469	0.251227	0.825476	Distal Intergenic	73310459	73310858	13	73319879	73328452	8574	2	407785	ENSMUST00000147407.1	17594	ENSMUSG00000021606	NADH:ubiquinone oxidoreductase core subunit S6
Shc4	3.53478	0.533911	0.251253	0.825476	Promoter (<=1kb)	125723067	125723466	2	125627447	125723387	95941	2	271849	ENSMUST00000042246.13	0	ENSMUSG00000035109	SHC (Src homology 2 domain containing) family, member 4
Acvr2a	0.822091	-1.2193	0.251279	0.825476	Distal Intergenic	47831089	47831488	2	48814109	48903269	89161	1	11480	ENSMUST00000063886.3	-982621	ENSMUSG00000052155	activin receptor IIA
Mmp14	2.11274	-0.767812	0.251373	0.825476	Promoter (<=1kb)	54432296	54432695	14	54432436	54435872	3437	1	17387	ENSMUST00000196155.1	0	ENSMUSG00000000957	matrix metallopeptidase 14 (membrane-inserted)
Evi5l	1.7814	0.993544	0.251425	0.825476	Promoter (<=1kb)	4205688	4206087	8	4205729	4206603	875	1	213027	ENSMUST00000177085.1	0	ENSMUSG00000011832	ecotropic viral integration site 5 like
1700057H15Rik	0.497984	1.69262	0.251586	0.825476	Intron (ENSMUST00000127913.7/78460, intron 2 of 3)	124443653	124444052	4	124450235	124451285	1051	2	78460	ENSMUST00000156566.1	7233	NA	RIKEN cDNA 1700057H15 gene
Cntnap5b	3.89839	0.471891	0.251587	0.825476	Intron (ENSMUST00000086738.9/241175, intron 10 of 23)	100180014	100180413	1	100252629	100369839	117211	1	241175	ENSMUST00000185484.1	-72216	ENSMUSG00000067028	contactin associated protein-like 5B
Rasgrf1	5.67202	0.257749	0.251722	0.825476	Promoter (<=1kb)	89908568	89908967	9	89909908	89915847	5940	1	19417	ENSMUST00000189545.1	-941	ENSMUSG00000032356	RAS protein-specific guanine nucleotide-releasing factor 1
Enpp1	2.57076	0.729049	0.251766	0.825476	Promoter (<=1kb)	24711435	24711834	10	24641806	24711991	70186	2	18605	ENSMUST00000135846.1	157	ENSMUSG00000037370	ectonucleotide pyrophosphatase/phosphodiesterase 1
Mir7680	5.61907	0.256385	0.251792	0.825476	Exon (ENSMUST00000181476.2/328646, exon 5 of 5)	21248048	21248447	16	21256013	21256066	54	2	102465781	ENSMUST00000183640.1	7619	ENSMUSG00000098400	microRNA 7680
3930402G23Rik	1.40375	-0.997634	0.251998	0.825711	Promoter (<=1kb)	10927354	10927753	8	10926917	10928444	1528	2	665306	ENSMUST00000208615.1	691	ENSMUSG00000038917	RIKEN cDNA 3930402G23 gene
Megf11	5.14381	0.280537	0.252398	0.82658	Promoter (<=1kb)	64386311	64386710	9	64385686	64709205	323520	1	214058	ENSMUST00000068967.10	625	ENSMUSG00000036466	multiple EGF-like-domains 11
Slc45a1	1.53354	1.12403	0.252655	0.826981	Distal Intergenic	150721903	150722302	4	150628572	150652174	23603	2	242773	ENSMUST00000037827.9	-69729	ENSMUSG00000039838	solute carrier family 45, member 1
Krt79	1.12825	1.31347	0.252849	0.827176	Promoter (<=1kb)	101929944	101930343	15	101929890	101930971	1082	2	223917	ENSMUST00000230273.1	628	ENSMUSG00000061397	keratin 79
Bbs9	2.27266	-0.724928	0.253105	0.827571	Intron (ENSMUST00000039798.15/319845, intron 20 of 21)	22830362	22830761	9	22678750	22888274	209525	1	319845	ENSMUST00000124076.1	151612	ENSMUSG00000035919	Bardet-Biedl syndrome 9 (human)
Ypel4	1.68947	-0.909814	0.25337	0.827999	Promoter (2-3kb)	84736389	84736788	2	84734227	84738649	4423	1	241525	ENSMUST00000151647.1	2162	ENSMUSG00000034059	yippee like 4
Gm13272	1.08266	1.31716	0.253556	0.828166	Promoter (<=1kb)	88780311	88780710	4	88779850	88780660	811	1	545648	ENSMUST00000179425.1	461	ENSMUSG00000096591	predicted gene 13272
4930435F18Rik	3.96056	-0.422946	0.254072	0.829032	Distal Intergenic	116706376	116706775	13	116802095	116838178	36084	2	74680	ENSMUST00000224552.1	131403	ENSMUSG00000114290	RIKEN cDNA 4930435F18 gene
Lif	1.40943	-0.992619	0.254219	0.829032	Distal Intergenic	4308991	4309390	11	4267095	4272514	5420	1	16878	ENSMUST00000040750.3	41896	ENSMUSG00000034394	leukemia inhibitory factor
Sox17	8.73342	0.206413	0.254226	0.829032	Promoter (<=1kb)	4492887	4493286	1	4492465	4493735	1271	2	20671	ENSMUST00000191939.1	449	ENSMUSG00000025902	SRY (sex determining region Y)-box 17
H2-Q2	5.93821	0.246662	0.255377	0.830832	Promoter (<=1kb)	35342508	35342907	17	35342242	35345794	3553	1	15013	ENSMUST00000074806.11	266	ENSMUSG00000091705	histocompatibility 2, Q region locus 2
Tha1	2.02545	0.889476	0.255653	0.830832	Distal Intergenic	117889223	117889622	11	117867952	117873481	5530	2	71776	ENSMUST00000153989.1	-15742	ENSMUSG00000017713	threonine aldolase 1
Cobl	3.46313	-0.505492	0.255739	0.830832	Promoter (<=1kb)	12464223	12464622	11	12304867	12464752	159886	2	12808	ENSMUST00000130572.1	130	ENSMUSG00000020173	cordon-bleu WH2 repeat
Bmp7	4.95013	0.2969	0.255814	0.830832	Distal Intergenic	172787576	172787975	2	172916118	172940092	23975	2	12162	ENSMUST00000137247.1	152117	ENSMUSG00000008999	bone morphogenetic protein 7
A530065N20Rik	3.40529	0.551695	0.255862	0.830832	Intron (ENSMUST00000225266.1/328263, intron 1 of 2)	60096934	60097333	13	60029711	60116669	86959	1	328263	ENSMUST00000225266.1	67223	ENSMUSG00000114531	RIKEN cDNA A530046M15 gene
Rnf123	3.86593	0.467353	0.255952	0.830832	Promoter (<=1kb)	108082306	108082705	9	108077722	108083344	5623	2	84585	ENSMUST00000159372.2	639	ENSMUSG00000041528	ring finger protein 123
Rpl11	4.12589	-0.394701	0.256036	0.830832	Distal Intergenic	136081574	136081973	4	136051241	136053428	2188	2	67025	ENSMUST00000128733.1	-28146	ENSMUSG00000059291	ribosomal protein L11
Iqsec3	2.34664	-0.698016	0.256071	0.830832	Promoter (<=1kb)	121473242	121473641	6	121372933	121473623	100691	2	243621	ENSMUST00000129815.7	0	ENSMUSG00000040797	IQ motif and Sec7 domain 3
Baiap2l2	4.03707	0.437764	0.256208	0.830832	Promoter (<=1kb)	79260659	79261058	15	79259716	79261297	1582	2	207495	ENSMUST00000167970.1	239	ENSMUSG00000018126	BAI1-associated protein 2-like 2
Stx3	4.39112	0.371182	0.256536	0.830832	Promoter (<=1kb)	11818279	11818678	19	11781597	11818721	37125	2	20908	ENSMUST00000211047.1	43	ENSMUSG00000041488	syntaxin 3
Plec	7.19678	0.240226	0.256581	0.830832	Promoter (<=1kb)	76232035	76232434	15	76188464	76232045	43582	2	18810	ENSMUST00000167754.7	0	ENSMUSG00000022565	plectin
Mir193a	5.20302	-0.264488	0.25683	0.830832	Promoter (<=1kb)	79711591	79711990	11	79711969	79712034	66	1	387188	ENSMUST00000083461.1	0	ENSMUSG00000065395	microRNA 193a
Osbp2	4.08328	0.42724	0.256868	0.830832	Promoter (<=1kb)	3774494	3774893	11	3717912	3774732	56821	2	74309	ENSMUST00000155197.1	0	ENSMUSG00000020435	oxysterol binding protein 2
Xkr6	1.42162	-0.984266	0.257026	0.830832	Distal Intergenic	63586172	63586571	14	63606503	63820809	214307	1	219149	ENSMUST00000119973.2	-19932	ENSMUSG00000035067	X-linked Kx blood group related 6
Hmcn2	5.59314	0.252295	0.257127	0.830832	Promoter (<=1kb)	31314413	31314812	2	31314415	31460738	146324	1	665700	ENSMUST00000113532.8	0	ENSMUSG00000055632	hemicentin 2
Cemip	4.44751	-0.341707	0.257183	0.830832	Promoter (<=1kb)	84085238	84085637	7	83932857	84086502	153646	2	80982	ENSMUST00000064174.11	865	ENSMUSG00000052353	cell migration inducing protein, hyaluronan binding
Ebf2	2.54099	0.723757	0.257253	0.830832	Intron (ENSMUST00000022637.13/13592, intron 7 of 16)	67272081	67272480	14	67234644	67428687	194044	1	13592	ENSMUST00000176029.1	37437	ENSMUSG00000022053	early B cell factor 2
Igdcc3	1.09284	1.3067	0.257339	0.830832	Promoter (<=1kb)	65179673	65180072	9	65180738	65181722	985	1	19289	ENSMUST00000217135.1	-666	ENSMUSG00000032394	immunoglobulin superfamily, DCC subclass, member 3
Adrb2	2.37129	0.770479	0.257346	0.830832	Promoter (<=1kb)	62179856	62180255	18	62177816	62179959	2144	2	11555	ENSMUST00000053640.4	0	ENSMUSG00000045730	adrenergic receptor, beta 2
4930404N11Rik	5.21627	-0.263289	0.257919	0.831709	Promoter (<=1kb)	81364273	81364672	10	81363067	81364854	1788	2	432479	ENSMUST00000131736.7	182	ENSMUSG00000020234	RIKEN cDNA 4930404N11 gene
Mapk13	4.66647	-0.312938	0.258339	0.831709	Promoter (<=1kb)	28769695	28770094	17	28769419	28779109	9691	1	26415	ENSMUST00000004986.13	276	ENSMUSG00000004864	mitogen-activated protein kinase 13
4921513I03Rik	4.49819	0.354986	0.258373	0.831709	Distal Intergenic	120722071	120722470	10	120765732	120774481	8750	1	70874	ENSMUST00000219219.1	-43262	ENSMUSG00000044544	RIKEN cDNA 4921513I03 gene
Tshz3	2.9806	-0.595919	0.258624	0.831709	Distal Intergenic	36679542	36679941	7	36698118	36773553	75436	1	243931	ENSMUST00000021641.7	-18177	ENSMUSG00000021217	teashirt zinc finger family member 3
Lhx5	1.76849	-0.85486	0.258695	0.831709	Distal Intergenic	120371201	120371600	5	120431699	120441223	9525	1	16873	ENSMUST00000031591.9	-60099	ENSMUSG00000029595	LIM homeobox protein 5
Smad6	7.88562	0.225287	0.258805	0.831709	Promoter (1-2kb)	64018973	64019372	9	63954009	64016987	62979	2	17130	ENSMUST00000144323.2	-1986	ENSMUSG00000036867	SMAD family member 6
Fmnl1	4.92541	0.295709	0.258884	0.831709	Promoter (2-3kb)	103199363	103199762	11	103196801	103197876	1076	1	57778	ENSMUST00000129726.2	2562	ENSMUSG00000055805	formin-like 1
Irx1	5.32143	0.26462	0.258921	0.831709	Distal Intergenic	72294517	72294916	13	71957921	71963723	5803	2	16371	ENSMUST00000077337.8	-330794	ENSMUSG00000060969	Iroquois homeobox 1
Fa2h	4.73979	-0.301727	0.258936	0.831709	Promoter (<=1kb)	111393333	111393732	8	111347470	111393818	46349	2	338521	ENSMUST00000162463.1	86	ENSMUSG00000033579	fatty acid 2-hydroxylase
Fgf16	4.30904	0.38337	0.259001	0.831709	Promoter (<=1kb)	105764954	105765353	20	105764279	105774939	10661	1	80903	ENSMUST00000033581.3	675	ENSMUSG00000031230	fibroblast growth factor 16
Il15ra	2.01716	0.886272	0.259106	0.831709	Promoter (<=1kb)	11705997	11706396	2	11705848	11733249	27402	1	16169	ENSMUST00000114832.2	149	ENSMUSG00000023206	interleukin 15 receptor, alpha chain
Tubg2	2.83585	-0.60853	0.259664	0.833023	Promoter (<=1kb)	101155811	101156210	11	101155907	101161787	5881	1	103768	ENSMUST00000043654.9	0	ENSMUSG00000045007	tubulin, gamma 2
Dmrt1	6.04585	0.246727	0.259786	0.833023	Promoter (<=1kb)	25505923	25506322	19	25505707	25560265	54559	1	50796	ENSMUST00000160814.1	216	ENSMUSG00000024837	doublesex and mab-3 related transcription factor 1
Gm11733	0.501429	1.66224	0.260031	0.833373	Promoter (<=1kb)	117483939	117484338	11	117484368	117489014	4647	1	432615	ENSMUST00000092394.3	-30	ENSMUSG00000069588	predicted gene 11733
Kmt5c	3.13655	-0.554123	0.260204	0.833493	Promoter (<=1kb)	4739604	4740003	7	4740115	4747514	7400	1	232811	ENSMUST00000098853.8	-112	ENSMUSG00000059851	lysine methyltransferase 5C
Sec16a	2.39928	-0.689826	0.260461	0.833881	Promoter (<=1kb)	26445228	26445627	2	26409433	26445216	35784	2	227648	ENSMUST00000091252.4	-12	ENSMUSG00000026924	SEC16 homolog A, endoplasmic reticulum export factor
Fbxw4	4.09897	0.422828	0.261263	0.835573	Distal Intergenic	45675806	45676205	19	45578254	45660312	82059	2	30838	ENSMUST00000046869.10	-15494	ENSMUSG00000040913	F-box and WD-40 domain protein 4
Runx1	1.746	0.984793	0.261376	0.835573	Downstream (<1kb)	92601051	92601450	16	92686758	92695495	8738	2	12394	ENSMUST00000187242.2	94045	ENSMUSG00000022952	runt related transcription factor 1
Hsd17b12	2.62349	-0.643278	0.261488	0.835573	Promoter (<=1kb)	94158010	94158409	2	94032689	94157964	125276	2	56348	ENSMUST00000028619.4	-46	ENSMUSG00000027195	hydroxysteroid (17-beta) dehydrogenase 12
Arhgef1	3.09775	-0.563221	0.261749	0.835573	Promoter (<=1kb)	24904080	24904479	7	24904356	24913451	9096	1	16801	ENSMUST00000206906.1	0	ENSMUSG00000040940	Rho guanine nucleotide exchange factor (GEF) 1
Mir3079	2.36141	0.766486	0.261871	0.835573	Exon (ENSMUST00000074173.3/74281, exon 3 of 5)	76284498	76284897	15	76290879	76290968	90	2	100526548	ENSMUST00000175428.1	6071	ENSMUSG00000093169	microRNA 3079
Mir7025	1.46095	1.10241	0.261941	0.835573	Distal Intergenic	75348179	75348578	5	75176831	75176904	74	1	102465620	ENSMUST00000183797.1	171348	ENSMUSG00000099060	microRNA 7025
Camkv	1.46095	1.10241	0.261941	0.835573	Promoter (<=1kb)	107936950	107937349	9	107937300	107945537	8238	1	235604	ENSMUST00000195219.1	0	ENSMUSG00000032936	CaM kinase-like vesicle-associated
S1pr5	7.60311	-0.225381	0.262168	0.835865	Promoter (3-4kb)	21244394	21244793	9	21242912	21248443	5532	2	94226	ENSMUST00000122088.1	3650	ENSMUSG00000045087	sphingosine-1-phosphate receptor 5
Mymx	3.94987	0.448058	0.262464	0.836375	Promoter (<=1kb)	45601302	45601701	17	45601254	45601966	713	2	653016	ENSMUST00000169137.2	265	ENSMUSG00000079471	myomixer, myoblast fusion factor
Gpbp1	1.14964	-1.08184	0.262763	0.836894	Promoter (<=1kb)	111490194	111490593	13	111425680	111490111	64432	2	73274	ENSMUST00000047627.13	-83	ENSMUSG00000032745	GC-rich promoter binding protein 1
Anks1b	1.51039	1.09533	0.263098	0.837465	Intron (ENSMUST00000183156.7/77531, intron 17 of 25)	90704637	90705036	10	90829111	90941465	112355	1	77531	ENSMUST00000182192.7	-124075	ENSMUSG00000058589	ankyrin repeat and sterile alpha motif domain containing 1B
Mir670	2.80828	0.655037	0.263234	0.837465	Distal Intergenic	94273059	94273458	2	94261300	94261399	100	2	735259	ENSMUST00000102380.1	-11660	ENSMUSG00000076335	microRNA 670
Ephb2	1.10593	1.28712	0.263351	0.837465	Promoter (<=1kb)	136835739	136836138	4	136647539	136835988	188450	2	13844	ENSMUST00000105845.8	0	ENSMUSG00000028664	Eph receptor B2
Iqsec2	0.458134	1.64902	0.263631	0.837613	Distal Intergenic	152129319	152129718	20	152144268	152225235	80968	1	245666	ENSMUST00000168786.7	-14550	ENSMUSG00000041115	IQ motif and Sec7 domain 2
Rbm19	3.48151	-0.494279	0.26367	0.837613	Distal Intergenic	120302417	120302816	5	120175725	120197969	22245	1	74111	ENSMUST00000202788.1	126692	ENSMUSG00000029594	RNA binding motif protein 19
Tspear	3.27794	-0.522937	0.264145	0.838675	Distal Intergenic	77677576	77677975	10	77686569	77886769	200201	1	252974	ENSMUST00000092366.3	-8594	ENSMUSG00000069581	thrombospondin type laminin G domain and EAR repeats
D430036J16Rik	3.73808	-0.451346	0.264278	0.838675	Promoter (<=1kb)	81632813	81633212	9	81632418	81644352	11935	1	319405	ENSMUST00000183781.1	395	ENSMUSG00000097466	RIKEN cDNA D430036J16 gene
Fgf17	5.48152	0.254067	0.264947	0.839245	Promoter (<=1kb)	70641721	70642120	14	70636509	70642254	5746	2	14171	ENSMUST00000227123.1	134	ENSMUSG00000022101	fibroblast growth factor 17
Paqr6	1.07729	1.28855	0.264958	0.839245	Promoter (<=1kb)	88366051	88366450	3	88366722	88368541	1820	1	68957	ENSMUST00000147818.1	-272	ENSMUSG00000041423	progestin and adipoQ receptor family member VI
Pold1	2.78906	-0.601582	0.265034	0.839245	Promoter (<=1kb)	44548623	44549022	7	44532746	44548847	16102	2	18971	ENSMUST00000049343.14	0	ENSMUSG00000038644	polymerase (DNA directed), delta 1, catalytic subunit
Sdk2	0.580684	-1.29921	0.265058	0.839245	Intron (ENSMUST00000041627.13/237979, intron 18 of 44)	113849497	113849896	11	113806341	113826219	19879	2	237979	ENSMUST00000125879.1	-23278	ENSMUSG00000041592	sidekick cell adhesion molecule 2
Abcc4	3.60788	0.505315	0.265691	0.839245	Distal Intergenic	118473796	118474195	14	118527758	118529965	2208	2	239273	ENSMUST00000228691.1	55770	ENSMUSG00000032849	ATP-binding cassette, sub-family C (CFTR/MRP), member 4
Klhl40	3.81596	-0.437737	0.265804	0.839245	Promoter (<=1kb)	121777761	121778160	9	121777691	121783818	6128	1	72330	ENSMUST00000098272.3	70	ENSMUSG00000074001	kelch-like 40
A230051N06Rik	2.27182	-0.704614	0.26585	0.839245	Promoter (<=1kb)	56241894	56242293	17	56241716	56242805	1090	1	320593	ENSMUST00000233314.1	178	ENSMUSG00000117172	RIKEN cDNA A230051N06 gene
Clybl	4.81229	0.303626	0.265978	0.839245	Promoter (2-3kb)	122255554	122255953	14	122258041	122402227	144187	1	69634	ENSMUST00000226136.1	-2088	ENSMUSG00000025545	citrate lyase beta like
D930007P13Rik	4.1447	0.414474	0.265997	0.839245	Promoter (<=1kb)	103146417	103146816	15	103123070	103146828	23759	2	432989	ENSMUST00000181306.1	12	ENSMUSG00000097003	Riken cDNA D930007P13 gene
Lncppara	3.38533	0.544453	0.266146	0.839245	Distal Intergenic	85634466	85634865	15	85653616	85707524	53909	1	102800312	ENSMUST00000230913.1	-18751	NA	long noncoding RNA near Ppara
Ank3	5.33896	0.257663	0.266225	0.839245	Promoter (<=1kb)	69398575	69398974	10	69398996	70023957	624962	1	11735	ENSMUST00000218680.1	-22	ENSMUSG00000069601	ankyrin 3, epithelial
Tcfl5	6.22375	-0.238087	0.266315	0.839245	Promoter (<=1kb)	180641552	180641951	2	180637466	180642347	4882	2	277353	ENSMUST00000131881.1	396	ENSMUSG00000038932	transcription factor-like 5 (basic helix-loop-helix)
Il6ra	4.09216	0.416119	0.266318	0.839245	Promoter (<=1kb)	89912603	89913002	3	89869324	89913162	43839	2	16194	ENSMUST00000029559.6	160	ENSMUSG00000027947	interleukin 6 receptor, alpha
Llgl2	6.63506	0.240351	0.266383	0.839245	Promoter (3-4kb)	115858866	115859265	11	115855032	115855780	749	1	217325	ENSMUST00000132999.1	3834	ENSMUSG00000020782	LLGL2 scribble cell polarity complex component
Mlycd	1.47091	1.08876	0.266649	0.839245	Distal Intergenic	119370256	119370655	8	119394878	119411102	16225	1	56690	ENSMUST00000098367.4	-24223	ENSMUSG00000074064	malonyl-CoA decarboxylase
Wnt3	7.69125	0.225688	0.266911	0.839245	Promoter (1-2kb)	103772602	103773001	11	103774150	103817957	43808	1	22415	ENSMUST00000000127.5	-1149	ENSMUSG00000000125	wingless-type MMTV integration site family, member 3
Esyt3	5.18	0.270519	0.26695	0.839245	Promoter (<=1kb)	99357987	99358386	9	99309963	99358518	48556	2	272636	ENSMUST00000042158.12	132	ENSMUSG00000037681	extended synaptotagmin-like protein 3
Csnk1g2	4.26279	-0.366506	0.266984	0.839245	Promoter (<=1kb)	80622299	80622698	10	80622838	80640741	17904	1	103236	ENSMUST00000079773.13	-140	ENSMUSG00000003345	casein kinase 1, gamma 2
Irx3	1.09763	1.27722	0.267051	0.839245	Distal Intergenic	91946759	91947158	8	91798525	91802067	3543	2	16373	ENSMUST00000175795.3	-144692	ENSMUSG00000031734	Iroquois related homeobox 3
Sncb	4.26399	-0.363048	0.267428	0.83975	Promoter (<=1kb)	54766057	54766456	13	54759381	54766097	6717	2	104069	ENSMUST00000134110.1	0	ENSMUSG00000034891	synuclein, beta
Fibcd1	5.88631	-0.239228	0.267563	0.83975	Promoter (<=1kb)	31846041	31846440	2	31813290	31846005	32716	2	98970	ENSMUST00000028188.7	-36	ENSMUSG00000026841	fibrinogen C domain containing 1
Agtrap	1.74381	0.969283	0.267866	0.83975	Exon (ENSMUST00000030862.4/70433, exon 7 of 7)	148102078	148102477	4	148083915	148088031	4117	2	11610	ENSMUST00000137393.1	-14047	ENSMUSG00000029007	angiotensin II, type I receptor-associated protein
Arglu1	1.38012	-0.967665	0.26822	0.83975	Distal Intergenic	8867943	8868342	8	8665075	8690521	25447	2	234023	ENSMUST00000048545.9	-177422	ENSMUSG00000040459	arginine and glutamate rich 1
Prom2	2.68101	-0.619155	0.268237	0.83975	Distal Intergenic	127559290	127559689	2	127526473	127541467	14995	2	192212	ENSMUST00000028855.13	-17823	ENSMUSG00000027376	prominin 2
Bloc1s4	0.475844	1.63407	0.268462	0.83975	Distal Intergenic	36768116	36768515	5	36747378	36748650	1273	2	117197	ENSMUST00000071949.4	-19466	ENSMUSG00000060708	biogenesis of lysosomal organelles complex-1, subunit 4, cappuccino
Antxr1	0.475844	1.63407	0.268462	0.83975	Promoter (2-3kb)	87332844	87333243	6	87157760	87335724	177965	2	69538	ENSMUST00000204805.2	2481	ENSMUSG00000033420	anthrax toxin receptor 1
Gnal	2.38911	0.754029	0.268524	0.83975	Promoter (<=1kb)	67088991	67089390	18	67088335	67192846	104512	1	14680	ENSMUST00000236551.1	656	ENSMUSG00000024524	guanine nucleotide binding protein, alpha stimulating, olfactory type
C1qtnf4	5.27999	-0.253795	0.268625	0.83975	Promoter (<=1kb)	90886738	90887137	2	90885860	90890525	4666	1	67445	ENSMUST00000111466.2	878	ENSMUSG00000040794	C1q and tumor necrosis factor related protein 4
Rasl11a	2.49725	-0.648841	0.268639	0.83975	Promoter (<=1kb)	146844931	146845330	5	146845071	146847726	2656	1	68895	ENSMUST00000031646.7	0	ENSMUSG00000029641	RAS-like, family 11, member A
Tle4	2.48989	-0.658069	0.268841	0.83975	Distal Intergenic	14442336	14442735	19	14543726	14595539	51814	2	21888	ENSMUST00000235975.1	152804	ENSMUSG00000024642	transducin-like enhancer of split 4
Ebf3	0.473388	1.63107	0.268978	0.83975	Intron (ENSMUST00000169486.8/13593, intron 6 of 15)	137288875	137289274	7	137195884	137267538	71655	2	13593	ENSMUST00000209578.1	-21337	ENSMUSG00000010476	early B cell factor 3
Aagab	3.05842	-0.557078	0.268988	0.83975	Promoter (<=1kb)	63602319	63602718	9	63602660	63644588	41929	1	66939	ENSMUST00000041551.8	0	ENSMUSG00000037257	alpha- and gamma-adaptin binding protein
Myadml2	2.09164	-0.742134	0.269357	0.840477	Promoter (<=1kb)	120647411	120647810	11	120646031	120648110	2080	2	68515	ENSMUST00000239158.1	300	ENSMUSG00000025141	myeloid-associated differentiation marker-like 2
Kl	3.1504	-0.5422	0.269501	0.840499	Promoter (<=1kb)	150952694	150953093	5	150952704	150986981	34278	1	16591	ENSMUST00000202096.1	0	ENSMUSG00000058488	klotho
Cacna1d	3.03867	-0.553308	0.269657	0.840559	Promoter (<=1kb)	30352338	30352737	14	30060744	30352964	292221	2	12289	ENSMUST00000238568.1	227	ENSMUSG00000015968	calcium channel, voltage-dependent, L type, alpha 1D subunit
Gprin1	1.58589	-0.897732	0.270059	0.840723	Exon (ENSMUST00000135343.1/26913, exon 2 of 2)	54737764	54738163	13	54736673	54749669	12997	2	26913	ENSMUST00000099506.1	11506	ENSMUSG00000069227	G protein-regulated inducer of neurite outgrowth 1
Aldh1a3	6.89178	-0.232449	0.270181	0.840723	Promoter (<=1kb)	66427348	66427747	7	66390890	66427517	36628	2	56847	ENSMUST00000015278.14	0	ENSMUSG00000015134	aldehyde dehydrogenase family 1, subfamily A3
Bdnf	8.11195	-0.211103	0.27029	0.840723	Promoter (<=1kb)	109693813	109694212	2	109694409	109727007	32599	1	12064	ENSMUST00000111043.8	-197	ENSMUSG00000048482	brain derived neurotrophic factor
Gm4559	1.06072	1.29615	0.27029	0.840723	Distal Intergenic	142281991	142282390	7	142273764	142274363	600	2	100043627	ENSMUST00000080669.5	-7628	ENSMUSG00000056885	predicted gene 4559
Pou3f2	1.09005	-1.06846	0.27043	0.840723	Downstream (2-3kb)	22479532	22479931	4	22482780	22488366	5587	2	18992	ENSMUST00000178174.2	8435	ENSMUSG00000095139	POU domain, class 3, transcription factor 2
Exoc2	2.79802	0.641629	0.270542	0.840723	Distal Intergenic	30985784	30986183	13	30923656	30974093	50438	2	66482	ENSMUST00000222133.1	-11691	ENSMUSG00000021357	exocyst complex component 2
Tbx15	7.45392	-0.226532	0.270695	0.840723	Promoter (3-4kb)	99250329	99250728	3	99253760	99354259	100500	1	21384	ENSMUST00000029462.9	-3032	ENSMUSG00000027868	T-box 15
Osbpl5	2.19182	0.80631	0.270804	0.840723	Promoter (<=1kb)	143740710	143741109	7	143688762	143740341	51580	2	79196	ENSMUST00000119499.7	-369	ENSMUSG00000037606	oxysterol binding protein-like 5
Cd302	2.5467	0.716463	0.271178	0.841459	Promoter (<=1kb)	60283764	60284163	2	60251993	60284418	32426	2	66205	ENSMUST00000028356.8	255	ENSMUSG00000060703	CD302 antigen
Gse1	0.527045	-1.29032	0.271388	0.841686	Intron (ENSMUST00000127664.1/108148, intron 1 of 15)	120306775	120307174	8	120228456	120553634	325179	1	382034	ENSMUST00000180448.2	78319	ENSMUSG00000031822	genetic suppressor element 1, coiled-coil protein
Tmem132cos	1.40652	-0.954416	0.271535	0.841718	Intron (ENSMUST00000119026.7/208213, intron 2 of 8)	127372477	127372876	5	127256858	127281634	24777	2	67351	ENSMUST00000145064.7	-90843	ENSMUSG00000087104	transmembrane protein 132C, opposite strand
6030466F02Rik	2.00385	0.863423	0.272314	0.842446	Promoter (3-4kb)	123730170	123730569	8	123733958	123739941	5984	1	234863	ENSMUST00000212339.1	-3389	ENSMUSG00000110599	RIKEN cDNA 6030466F02 gene
Slc9a3r2	2.89482	0.621302	0.272314	0.842446	Promoter (<=1kb)	24649771	24650170	17	24639291	24650013	10723	2	65962	ENSMUST00000234912.1	0	ENSMUSG00000002504	solute carrier family 9 (sodium/hydrogen exchanger), member 3 regulator 2
Tmem174	7.53132	0.229156	0.272542	0.842446	Distal Intergenic	98573073	98573472	13	98634978	98637410	2433	2	68344	ENSMUST00000050389.4	63938	ENSMUSG00000046082	transmembrane protein 174
Wrnip1	1.41623	-0.957167	0.272665	0.842446	Promoter (<=1kb)	32802191	32802590	13	32802116	32822607	20492	1	78903	ENSMUST00000220560.1	75	ENSMUSG00000021400	Werner helicase interacting protein 1
Tmem132e	5.48522	-0.242426	0.272773	0.842446	Promoter (3-4kb)	82434176	82434575	11	82438257	82442899	4643	1	270893	ENSMUST00000202598.1	-3682	ENSMUSG00000020701	transmembrane protein 132E
Skor1	2.25232	-0.708435	0.27293	0.842446	Distal Intergenic	63124077	63124476	9	63138176	63146980	8805	2	207667	ENSMUST00000055281.7	22504	ENSMUSG00000022245	SKI family transcriptional corepressor 1
Gm4675	2.6479	0.671932	0.272995	0.842446	Downstream (2-3kb)	118230128	118230527	14	118236232	118238759	2528	1	105245869	ENSMUST00000164755.1	-5705	ENSMUSG00000090534	predicted gene 4675
1700124L16Rik	5.02891	0.27588	0.272995	0.842446	Promoter (<=1kb)	83762794	83763193	6	83761756	83762842	1087	2	67934	ENSMUST00000189308.2	0	ENSMUSG00000099354	RIKEN cDNA 1700124L16 gene
Prss36	2.38849	0.743179	0.273403	0.842446	Promoter (1-2kb)	127944656	127945055	7	127932638	127946725	14088	2	77613	ENSMUST00000094026.9	1670	ENSMUSG00000070371	protease, serine 36
Gse1	0.485002	1.58497	0.273601	0.842446	Intron (ENSMUST00000127664.1/108148, intron 1 of 15)	120297638	120298037	8	120228456	120553634	325179	1	382034	ENSMUST00000180448.2	69182	ENSMUSG00000031822	genetic suppressor element 1, coiled-coil protein
Mir7020	2.37895	-0.671295	0.27373	0.842446	Promoter (<=1kb)	139643832	139644231	4	139644042	139644111	70	1	102465617	ENSMUST00000183787.1	0	ENSMUSG00000098569	microRNA 7020
Dpcd	2.3571	0.753298	0.273818	0.842446	Promoter (<=1kb)	45574032	45574431	19	45575174	45577511	2338	1	226162	ENSMUST00000237600.1	-743	ENSMUSG00000041035	deleted in primary ciliary dyskinesia
P4ha3	2.01712	0.863544	0.273982	0.842446	Promoter (<=1kb)	100285531	100285930	7	100285542	100298687	13146	1	320452	ENSMUST00000148620.1	0	ENSMUSG00000051048	procollagen-proline, 2-oxoglutarate 4-dioxygenase (proline 4-hydroxylase), alpha polypeptide III
Rbmxl2	3.58304	0.49978	0.274064	0.842446	Promoter (<=1kb)	107210105	107210504	7	107209445	107210916	1472	1	76572	ENSMUST00000098135.1	660	ENSMUSG00000073894	RNA binding motif protein, X-linked-like 2
Il4i1	3.4039	0.530677	0.27419	0.842446	Promoter (<=1kb)	44839775	44840174	7	44839198	44839768	571	1	14204	ENSMUST00000133279.1	577	ENSMUSG00000074141	interleukin 4 induced 1
1700044C05Rik	0.459378	1.61546	0.274283	0.842446	Distal Intergenic	118423085	118423484	14	118365878	118398170	32293	1	73306	ENSMUST00000186060.1	57207	ENSMUSG00000099911	RIKEN cDNA 1700044C05 gene
[truncated: 4,148 more rows]
